# Supplementary material for: Statin-mediated reduction in mitochondrial cholesterol primes an anti-inflammatory response in macrophages by upregulating Jmjd3
Source: eLife. 2024 Apr 11;13:e85964. doi: 10.7554/eLife.85964 (PMC11186637; doi:10.7554/eLife.85964)
Supplement: Supplementary file 1. [file elife-85964-supp1.xlsx]

## Sheet:  S 1a - statin regulated gene
Table S1a Genes regulated by statin
Row.names	baseMean	log2FoldChange	lfcSE	stat	pvalue	padj
Pgf	101.572	10.1365	1.48546	6.82381	8.86569e-12	1.50272e-10
Rab15	60.6741	9.39322	1.50827	6.22781	4.73005e-10	6.56382e-09
Sphk1	119.264	8.93057	1.4658	6.09264	1.11061e-09	1.45491e-08
Cplx2	39.5251	8.77434	1.53218	5.72671	1.02395e-08	1.14958e-07
Edn1	211.858	8.70179	1.39506	6.2376	4.44345e-10	6.20859e-09
Dok7	31.2335	8.4358	1.62065	5.20518	1.93805e-07	1.79089e-06
Pdcd1	18.4679	7.6776	1.6477	4.65959	3.16846e-06	2.3229e-05
Bdkrb2	16.1603	7.48521	1.68779	4.43491	9.21098e-06	6.17278e-05		a
Pdpn	194.705	7.24556	1.17952	6.14281	8.1076e-10	1.0939e-08
Nr4a3	117.045	6.90515	0.829961	8.31985	8.80716e-17	2.79123e-15
Dusp8	355.263	6.79065	0.476597	14.2482	4.60069e-46	1.27251e-43
Areg	198.409	6.69462	1.03492	6.46873	9.88316e-11	1.47944e-09
Gm13889	226.652	6.67202	0.551843	12.0904	1.18667e-33	1.55288e-31
Ptpn14	71.7206	6.58062	0.922581	7.13284	9.83169e-13	1.90528e-11
Hgfac	19.793	6.32999	1.57356	4.02273	5.75279e-05	0.000318814
Clec4n	776.02	6.15795	0.270708	22.7476	1.51709e-114	4.61574e-111
Mylk2	6.32582	6.13194	1.94718	3.14914	0.00163753	0.0060117
Socs2	6.14389	6.08826	1.95122	3.12023	0.00180709	0.00656174
Hr	260.549	6.01803	0.444362	13.5431	8.70658e-42	2.07763e-39
Arntl2	15.947	6.01624	1.61649	3.72178	0.000197822	0.000956874
Esyt3	5.79683	6.00639	2.02213	2.97033	0.00297479	0.0101042
Arhgef26	5.70232	5.97971	2.19904	2.71924	0.00654321	0.0198334
Itgb3	134.356	5.92427	2.06102	2.87444	0.00404747	0.0132058
Tnfrsf9	54.1042	5.76158	0.969419	5.94334	2.7928e-09	3.41592e-08
Hbegf	93.3372	5.73703	0.69284	8.28046	1.22701e-16	3.80836e-15
Sema7a	4.33614	5.58601	2.11493	2.64122	0.00826075	0.0241725
Lrrc32	32.9748	5.47355	1.08373	5.05067	4.40269e-07	3.80005e-06
Scn11a	3.83629	5.40894	2.19455	2.46471	0.0137123	0.0371261
Prss35	3.81686	5.40232	2.19056	2.46618	0.0136562	0.0370148
Mustn1	37.7018	5.2576	0.999142	5.26212	1.42404e-07	1.34658e-06
Rgs16	525.963	5.19074	1.03495	5.01546	5.29068e-07	4.50501e-06
Clcf1	8.82287	5.15127	1.77022	2.90995	0.00361481	0.0119642
BC021614	8.39102	5.07556	1.76911	2.86899	0.00411785	0.0133959
Cxcl2	11493.4	5.02131	0.170438	29.4613	9.02179e-191	1.09795e-186
Fam20a	7.77461	4.9668	1.85478	2.67783	0.00741	0.0220327
Sp7	7.59268	4.92879	1.79926	2.73934	0.00615636	0.018839
Gprc5a	149.78	4.92763	0.554467	8.88714	6.27e-19	2.48553e-17
Nfe2	68.0691	4.87539	0.632091	7.7131	1.22793e-14	3.03123e-13
Ccl3	42453	4.84725	0.208532	23.2447	1.61109e-119	6.53567e-116
Lamc2	42.4195	4.83783	0.802754	6.02654	1.67506e-09	2.1257e-08
Tnc	1560.43	4.76461	0.247683	19.2367	1.82382e-82	2.01781e-79
Ccl4	12207.4	4.72524	0.425628	11.1018	1.22922e-28	1.21623e-26
Flnc	2986.17	4.69991	0.605239	7.76538	8.14008e-15	2.05529e-13
Olr1	126.476	4.55726	0.459531	9.9172	3.50464e-23	2.14329e-21
Notum	30.3262	4.53904	0.871598	5.20773	1.91167e-07	1.76921e-06
Phlda1	1421.49	4.51565	0.204871	22.0415	1.15314e-107	2.33896e-104
Mapk8ip1	5.8514	4.48289	1.90298	2.35573	0.0184866	0.0476555
Arg2	162.503	4.44935	0.382605	11.6291	2.93204e-31	3.43106e-29
Slc6a4	10.5604	4.42327	1.44412	3.06295	0.00219167	0.00772673
Plekhg6	26.0876	4.35653	0.894682	4.86936	1.11959e-06	8.96999e-06
Chst11	266.321	4.35459	0.335017	12.9981	1.25384e-38	2.5432e-36
Mmp9	1342.42	4.33972	0.737244	5.88641	3.94671e-09	4.67687e-08
Cish	61.111	4.31786	0.587844	7.34524	2.05397e-13	4.29498e-12
Egr2	2743.37	4.30887	0.659166	6.53685	6.28274e-11	9.65415e-10
Dusp14	31.2154	4.29311	0.869342	4.93834	7.87903e-07	6.48329e-06
Wnk2	9.66607	4.2282	1.40891	3.00104	0.00269063	0.00923433
Plk3	3582.53	4.15413	0.226749	18.3204	5.68696e-75	5.32387e-72
Adm	27.05	4.11753	1.01189	4.06914	4.71875e-05	0.000267227
P2rx5	55.8602	4.1143	0.661615	6.21858	5.01679e-10	6.93799e-09
Scimp	251.211	4.00792	0.323566	12.3867	3.08333e-35	4.6326e-33
Csf3	31.8585	3.96728	0.76584	5.1803	2.21525e-07	2.02399e-06
Procr	453.472	3.95923	0.341376	11.5978	4.22608e-31	4.76217e-29
Tmcc3	127.173	3.95101	0.493425	8.00732	1.1724e-15	3.24775e-14
Maff	1067.46	3.94665	0.180266	21.8935	2.99561e-106	5.20807e-103
Plk2	3597.4	3.93599	0.443653	8.87177	7.19932e-19	2.82631e-17
Vgf	11.029	3.88772	1.32038	2.94441	0.00323572	0.0108571
Gucy2g	378.412	3.88189	0.259758	14.9443	1.69761e-50	6.66448e-48
Itgax	2921.95	3.86892	0.692339	5.58819	2.29446e-08	2.44514e-07
Osm	1479.14	3.8377	0.230428	16.6546	2.80079e-62	2.00503e-59
F3	29.9337	3.83515	0.764968	5.01348	5.34553e-07	4.53978e-06
Nes	113.97	3.81568	0.548297	6.95914	3.42354e-12	6.17251e-11
Ccr1	270.612	3.75602	0.387031	9.70472	2.87866e-22	1.61444e-20
Ier3	6381.36	3.72622	0.215412	17.2981	4.86514e-67	3.94725e-64
Ccdc136	7.1556	3.68669	1.56171	2.36067	0.0182421	0.0471351
Myrf	26.4158	3.68381	0.837623	4.39793	1.09286e-05	7.20875e-05
Kcnd1	76.386	3.67486	0.485934	7.56248	3.95456e-14	8.97892e-13
Ccl2	367.01	3.64347	0.29949	12.1656	4.74229e-34	6.55837e-32
Plat	9.27949	3.62508	1.36813	2.64966	0.00805719	0.0237079
Ptgs2	3938.41	3.61907	0.215499	16.7939	2.70572e-63	2.05804e-60
Mmp12	130.826	3.60106	1.13514	3.17234	0.00151215	0.0056209
Serinc2	537.967	3.59788	0.264855	13.5844	4.95888e-42	1.20699e-39
Egln3	91.3668	3.57404	0.618116	5.78216	7.37487e-09	8.47519e-08
Fosl1	461.157	3.54152	0.925614	3.82613	0.000130174	0.000660642
Tmem151a	36.3647	3.53481	0.678116	5.21269	1.86126e-07	1.72561e-06
Cdh23	9.03776	3.52665	1.36079	2.59163	0.00955238	0.0273937
Il1rn	10824.8	3.51662	0.442406	7.94885	1.8825e-15	5.07982e-14
Sept5	24.7227	3.5151	0.808665	4.3468	1.38141e-05	8.90454e-05
Il11	21.1098	3.51164	0.953958	3.68113	0.000232206	0.00109916
Epha2	195.042	3.51136	0.397986	8.82282	1.11618e-18	4.27166e-17
Kdelr3	42.0842	3.46498	0.662322	5.23156	1.68086e-07	1.57233e-06
Dusp5	291.384	3.45763	0.283629	12.1907	3.48411e-34	4.87375e-32
Dcstamp	905.58	3.44501	0.543578	6.33766	2.33276e-10	3.34784e-09
Pacsin1	26.8237	3.42736	0.801718	4.27502	1.91124e-05	0.000119772
Xirp1	94.2405	3.38238	0.485822	6.96217	3.35073e-12	6.0592e-11
Fcrlb	18.9105	3.36328	0.905603	3.71386	0.000204124	0.000982281
Spint2	7.79937	3.35799	1.43418	2.34139	0.019212	0.0492957
Slc17a6	25.9979	3.35027	0.880539	3.8048	0.00014192	0.000712821
Pcbp4	152.737	3.3417	1.38713	2.40907	0.015993	0.0422844
Spred3	164.221	3.32086	0.348272	9.53525	1.4953e-21	7.84386e-20
Cmklr1	8.18225	3.3087	1.34819	2.45418	0.0141208	0.0380438
Fosb	90.0097	3.30294	0.486494	6.78926	1.12712e-11	1.89462e-10
Thsd4	20.4467	3.28251	0.862378	3.80635	0.000141035	0.000708963
Acy1	409.721	3.2721	0.733868	4.4587	8.24583e-06	5.58752e-05
Hspa1b	1734.15	3.26653	0.494302	6.60837	3.88582e-11	6.08628e-10
Celsr3	104.721	3.24602	0.40217	8.07126	6.95742e-16	1.96454e-14
Acap1	594.012	3.18477	0.213051	14.9483	1.59666e-50	6.47712e-48
Pla1a	91.342	3.17565	0.421248	7.53867	4.74777e-14	1.07398e-12
Irg1	6084.7	3.13713	0.121087	25.9081	5.39186e-148	3.28094e-144
Ehd2	1875.12	3.13712	0.614162	5.10796	3.25656e-07	2.88655e-06
Spp1	662611	3.11341	0.152715	20.387	2.18084e-92	2.65409e-89
Syn1	15.3063	3.05994	0.99652	3.07063	0.00213611	0.00756812
Myc	137.95	3.02549	0.390443	7.74886	9.27201e-15	2.3266e-13
Cyp2s1	35.342	3.01312	0.651668	4.62371	3.76936e-06	2.72729e-05
Slc15a3	3410.92	3.01182	0.144882	20.788	5.55596e-96	7.51289e-93
Olfr920	84.4727	3.00957	0.42073	7.1532	8.47758e-13	1.65075e-11
Rhob	3330.49	2.99189	0.56952	5.25335	1.49354e-07	1.40793e-06
Ccl7	17.1185	2.97508	0.917875	3.24127	0.00118999	0.00459607
Cystm1	41.7049	2.96015	0.605794	4.8864	1.02697e-06	8.27151e-06
Atp6v0d2	2326.34	2.94231	0.221016	13.3126	1.95491e-40	4.57523e-38
Gem	112.803	2.93435	0.419659	6.99222	2.70562e-12	4.97393e-11
Gm15645	24.5686	2.93311	0.79995	3.66661	0.000245783	0.00115697
Src	1638.53	2.89879	0.188758	15.3572	3.17026e-53	1.54328e-50
Flrt3	18.3838	2.88452	0.893731	3.22751	0.00124874	0.004782
Cd5	9.84144	2.87627	1.18727	2.4226	0.01541	0.0410013
Fhdc1	23.7865	2.86229	0.896843	3.19152	0.00141527	0.00531436
Tnf	10303.1	2.85584	0.151315	18.8734	1.88681e-79	1.91354e-76
Arc	733.693	2.83139	0.258404	10.9572	6.13375e-28	5.48881e-26
Adamts1	350.008	2.79788	0.287657	9.72645	2.32562e-22	1.31641e-20
Dusp1	1634.01	2.7924	0.193878	14.4028	4.96664e-47	1.47424e-44
Scel	435.054	2.77493	0.229303	12.1016	1.03613e-33	1.37319e-31
Il1b	765.829	2.75795	0.246662	11.1811	5.04794e-29	5.03553e-27
Csrnp1	2165.53	2.74155	0.196749	13.9343	3.92175e-44	1.01548e-41
Pdgfa	1557.79	2.72783	0.188011	14.5088	1.06511e-47	3.32367e-45
Fbxo2	20.9836	2.72464	0.835214	3.26221	0.00110549	0.00430935
Plaur	3890.83	2.72165	0.18451	14.7507	3.0464e-49	1.05928e-46
P4ha2	10.5584	2.6633	1.10759	2.40459	0.0161906	0.0426863
Plau	9531.64	2.651	0.215087	12.3252	6.62641e-35	9.60041e-33
Gadd45g	37.1067	2.6477	0.60297	4.39109	1.12785e-05	7.4194e-05
Hspa1a	96.7309	2.63006	0.489557	5.37234	7.77235e-08	7.70273e-07
Gstt1	11.8641	2.61121	1.04661	2.49493	0.0125983	0.0346253
Lif	226.609	2.60002	0.29085	8.93938	3.91371e-19	1.6037e-17
Odc1	25820	2.59789	0.578994	4.48691	7.22642e-06	4.9491e-05
Eva1b	75.7811	2.58378	0.474643	5.44363	5.2206e-08	5.27697e-07
Kdm6b	1996.94	2.5814	0.18405	14.0256	1.08709e-44	2.87606e-42
Gng4	40.664	2.56999	0.575358	4.46677	7.94098e-06	5.39898e-05
Serpine1	370.283	2.54534	0.289214	8.80088	1.35748e-18	5.16268e-17
Fam214b	1137.11	2.5432	0.179271	14.1863	1.11363e-45	3.01174e-43
Tubb2b	470.674	2.53674	0.273203	9.28518	1.61437e-20	7.76554e-19
Gli1	12.0538	2.53281	1.06634	2.37524	0.0175375	0.0455758
Fam131a	169.417	2.5308	0.341397	7.41307	1.23407e-13	2.67712e-12
Mir22hg	721.012	2.51824	0.204304	12.326	6.56576e-35	9.60041e-33
Fermt2	15.2857	2.49199	0.983238	2.53448	0.0112616	0.0314415
Pilra	34.8582	2.49179	0.632628	3.93879	8.18936e-05	0.000438471
E230016K23Rik	19.7109	2.46257	0.843829	2.91833	0.00351914	0.0116761
Ccrl2	730.942	2.45504	0.253867	9.67058	4.02095e-22	2.22432e-20
Adora2a	20.7267	2.44664	0.80126	3.05349	0.00226195	0.00793313
Nr4a1	737.455	2.44162	0.210307	11.6098	3.67569e-31	4.22011e-29
Cadm4	12.4185	2.44106	1.01452	2.40613	0.0161227	0.0425625
Bcl6b	241.514	2.42539	0.298117	8.13568	4.0962e-16	1.18692e-14
Lpin1	1860.08	2.4215	0.197281	12.2743	1.24392e-34	1.76029e-32
Nt5e	32.984	2.4108	0.649583	3.71131	0.000206188	0.000989866
Htra4	19.7203	2.39971	0.796239	3.0138	0.00257994	0.00888955
Il20rb	75.0193	2.38403	0.49951	4.77274	1.81738e-06	1.40162e-05
Eno2	1797.58	2.37703	0.216663	10.9711	5.26482e-28	4.78156e-26
Pdgfb	8199.26	2.37667	0.160923	14.769	2.3224e-49	8.31282e-47
Cass4	2007.18	2.37418	0.159725	14.8642	5.62668e-50	2.1399e-47
Malt1	9201.06	2.37366	0.160537	14.7857	1.81102e-49	6.67881e-47
Prr7	51.4115	2.36478	0.500638	4.72354	2.31774e-06	1.74576e-05
Slc40a1	208.754	2.36369	0.353002	6.69597	2.14251e-11	3.47657e-10
Stk38l	6596.81	2.33617	0.186851	12.5029	7.19818e-36	1.18381e-33
Ggn	36.8445	2.31428	0.593398	3.90005	9.61719e-05	0.000506672
Serpinb9b	29.9538	2.31297	0.756208	3.05865	0.00222338	0.0078205
Ccl9	29153.7	2.30941	0.1567	14.7378	3.6842e-49	1.24546e-46
Gm5547	33.1672	2.30886	0.658137	3.50818	0.000451182	0.0019787
Pygl	49.9213	2.29606	0.533714	4.30205	1.69227e-05	0.000106875
Pdgfrb	345.1	2.28641	0.894241	2.55682	0.0105634	0.0297723
Layn	2119.84	2.28366	0.182678	12.501	7.36962e-36	1.19584e-33
Agpat9	197.867	2.27334	0.278203	8.17152	3.04525e-16	9.0392e-15
Col11a2	154.048	2.27113	0.331578	6.84947	7.41251e-12	1.27416e-10
Fbxo15	62.6789	2.26397	0.501501	4.51438	6.35023e-06	4.39604e-05
Sh2d5	19.6471	2.23546	0.825559	2.70781	0.00677279	0.0204165
Abtb2	408.293	2.2308	0.262186	8.50848	1.76235e-17	6.04164e-16
Rhoc	13239.9	2.22283	0.13564	16.3878	2.33887e-60	1.58134e-57
Lat	29.5849	2.22143	0.688124	3.22824	0.00124553	0.00477118
Gfod1	6386.22	2.21645	0.161851	13.6944	1.09654e-42	2.72344e-40
A330023F24Rik	60.0425	2.21622	0.52688	4.20632	2.59568e-05	0.000157318
Mfsd2a	57.2659	2.21043	0.468432	4.71879	2.3725e-06	1.78121e-05
Zfp36	4547.07	2.20097	0.151411	14.5364	7.12699e-48	2.28251e-45
Myh14	109.637	2.2008	0.350282	6.28294	3.32235e-10	4.69061e-09
Cdc42ep2	827.65	2.20001	0.166432	13.2187	6.84569e-40	1.54282e-37
Nr4a2	521.794	2.19791	0.265497	8.27848	1.24755e-16	3.84373e-15
Smad7	161.432	2.1972	0.31406	6.9961	2.63181e-12	4.86765e-11
Dpep3	30.5852	2.19586	0.65138	3.37109	0.000748709	0.00307001
Ankrd33b	114.743	2.16992	0.408692	5.30943	1.09969e-07	1.0664e-06
Fam19a3	223.942	2.16682	0.292022	7.42007	1.17058e-13	2.54392e-12
Tgm2	1611.63	2.16655	0.210407	10.2969	7.27334e-25	5.23767e-23
Rasgef1b	12542.8	2.16362	0.124602	17.3642	1.5406e-67	1.33922e-64
Pdzk1ip1	35.2219	2.16188	0.694512	3.1128	0.00185321	0.00671036
Serpini1	44.7546	2.15263	0.579191	3.71661	0.000201912	0.000974332
Hspa4l	3811.35	2.14494	0.171846	12.4817	9.39344e-36	1.50419e-33
Npdc1	38.8015	2.13593	0.571063	3.74027	0.000183826	0.000897736
Fosl2	3998.07	2.13402	0.141963	15.0322	4.51844e-51	1.96391e-48
Trib1	952.545	2.13215	0.25108	8.49191	2.03268e-17	6.90997e-16
Sgtb	303.181	2.12886	0.227344	9.36403	7.67488e-21	3.72125e-19
Nckap1	235.364	2.11544	0.295396	7.16137	7.98754e-13	1.56284e-11
Trp53i11	53.3937	2.10417	0.530275	3.96807	7.24583e-05	0.000393317
Fam65c	33.3589	2.09174	0.658273	3.17762	0.00148489	0.00553648
Tlcd2	38.3987	2.08852	0.628759	3.32165	0.000894864	0.0035966
Il23a	15.482	2.08536	0.876103	2.38026	0.0173002	0.0451046
Ocstamp	17.2664	2.06839	0.843057	2.45344	0.0141497	0.0380894
Kctd11	589.476	2.0671	0.203276	10.1689	2.72917e-24	1.81497e-22
Socs3	615.761	2.06089	0.187043	11.0183	3.11994e-28	2.98973e-26
Ralgds	5834.99	2.05949	0.127561	16.1451	1.22903e-58	7.47865e-56
Grtp1	911.478	2.05105	0.226024	9.07447	1.14232e-19	4.96503e-18
Snn	51.5248	2.04344	0.532704	3.83598	0.000125066	0.000638176
Adora2b	220.189	2.03196	0.287149	7.07632	1.48034e-12	2.81936e-11
Traf1	2785.55	2.03099	0.127466	15.9336	3.70517e-57	2.04963e-54
Ptges	119.912	2.02913	0.338841	5.98843	2.11877e-09	2.63925e-08
Atf3	9771.59	2.02669	0.207497	9.76731	1.55521e-22	9.01279e-21
Slc9a3r2	576.181	2.02038	0.252624	7.99758	1.26891e-15	3.49381e-14
Col18a1	762.202	2.00964	0.170932	11.7569	6.50478e-32	7.91631e-30
Bhlhe40	4928.5	1.99072	0.15035	13.2406	5.11649e-40	1.17486e-37
Bcar1	42.0768	1.98882	0.611775	3.2509	0.00115038	0.00446292
Hcar2	2184.76	1.98597	0.159581	12.4449	1.49117e-35	2.32661e-33
Mertk	31.665	1.98442	0.849543	2.33587	0.0194983	0.0499461
Itgal	4853.1	1.98392	0.156672	12.6628	9.5e-37	1.7256e-34
Tbc1d9	293.433	1.98291	0.274538	7.22271	5.09603e-13	1.0209e-11
Hivep3	1601.02	1.98107	0.243164	8.14707	3.72861e-16	1.08558e-14
Flrt2	1897.91	1.96092	0.16518	11.8715	1.6653e-32	2.11111e-30
Frmd6	418.951	1.95659	0.216736	9.02753	1.75584e-19	7.52416e-18
Fbxl16	36.164	1.95348	0.589272	3.31507	0.000916199	0.00366541
Ppm1j	1266.62	1.94992	0.155075	12.5741	2.93282e-36	5.12698e-34
Rffl	1806.69	1.93413	0.174521	11.0825	1.52565e-28	1.48537e-26
Fam46c	30.5003	1.93378	0.67989	2.84425	0.00445161	0.0143437
Egr1	4282.26	1.93023	0.124782	15.4688	5.63711e-54	2.85848e-51
Slc22a4	143.347	1.92974	0.357734	5.39436	6.87687e-08	6.84874e-07
Rcor2	150.997	1.92754	0.320467	6.0148	1.8011e-09	2.27144e-08
Folr1	46.5821	1.9273	0.641342	3.0051	0.00265497	0.00912225
Srgn	15482.5	1.92653	0.146346	13.1642	1.41013e-39	3.12024e-37
Nos3	38.2657	1.92471	0.557267	3.45383	0.000552687	0.00237054
Grasp	154.021	1.91779	0.330266	5.80682	6.36687e-09	7.35848e-08
G530011O06Rik	31.6351	1.91738	0.694964	2.75896	0.00579852	0.0179243
Pvr	1936.38	1.91586	0.148942	12.8631	7.25789e-38	1.38013e-35
Nyap1	28.6561	1.91404	0.643621	2.97387	0.00294074	0.00999407
Bdh2	100.56	1.91373	0.370157	5.17004	2.34047e-07	2.12881e-06
Rilpl1	517.707	1.91152	0.195801	9.76253	1.6304e-22	9.40378e-21
Etv4	33.3095	1.91067	0.807371	2.36653	0.0179558	0.0464845
Tm7sf2	494.77	1.90706	0.284075	6.71323	1.90362e-11	3.11804e-10
Rgs1	3758.48	1.90407	0.458666	4.15133	3.30555e-05	0.000193966
Ctsh	31.4072	1.9033	0.617716	3.08119	0.00206172	0.00733875
Rgcc	54.6913	1.90309	0.578762	3.2882	0.0010083	0.0039815
Jund	9995	1.90287	0.131254	14.4976	1.25436e-47	3.8164e-45
Ank	32522.1	1.89232	0.19254	9.82821	8.51194e-23	5.02865e-21
Rnf145	4759.42	1.88475	0.180024	10.4695	1.19312e-25	9.19003e-24
Btg2	3783.27	1.88203	0.52133	3.61006	0.00030613	0.00140218
Clec4e	18751.7	1.87736	0.120555	15.5727	1.11577e-54	5.90389e-52
Dusp2	335.782	1.87565	0.226549	8.27924	1.23967e-16	3.82914e-15
Hdc	43.8521	1.87296	0.552125	3.39228	0.000693139	0.00287803
Hist1h1c	638.863	1.86277	0.256523	7.26161	3.82498e-13	7.8104e-12
Lcat	32.3224	1.86089	0.669603	2.77909	0.00545115	0.0170454
Mapk11	843.526	1.85825	0.197634	9.40247	5.32947e-21	2.62589e-19
Cd9	55464.7	1.83356	0.120964	15.1579	6.71592e-52	3.02714e-49
Fndc3b	11143.8	1.82703	0.127339	14.3478	1.09934e-46	3.18546e-44
Tmem202	94.7307	1.82673	0.366325	4.98663	6.14424e-07	5.15692e-06
Hilpda	736.713	1.82667	0.204094	8.95013	3.55049e-19	1.46971e-17
Tnfrsf23	1371.74	1.82556	0.16961	10.7633	5.12991e-27	4.30558e-25
Mturn	259.456	1.82299	0.29767	6.12418	9.115e-10	1.21767e-08
Lpp	1034.81	1.82255	0.181895	10.0198	1.24758e-23	7.94923e-22
Myo6	156.647	1.8156	0.308012	5.89456	3.75681e-09	4.4912e-08
Gm15471	50.2994	1.81384	0.508563	3.56659	0.00036165	0.0016283
Aplp1	116.439	1.80475	0.390943	4.6164	3.9045e-06	2.81004e-05
Fam49a	25.6968	1.80224	0.69158	2.60598	0.00916117	0.0264345
Rora	111.327	1.80169	0.379874	4.74286	2.10721e-06	1.6008e-05
Kdm5b	1268.05	1.80091	0.191589	9.39988	5.46244e-21	2.6761e-19
6530402F18Rik	67.4594	1.79776	0.513294	3.50239	0.000461104	0.0020193
Slc45a3	591.795	1.79709	0.223249	8.04974	8.29669e-16	2.32651e-14
Tnfrsf12a	898.691	1.79612	0.202986	8.84848	8.87206e-19	3.43863e-17
Arhgap31	2013.61	1.7943	0.186682	9.61153	7.14789e-22	3.83215e-20
Pim1	3830.55	1.78887	0.136582	13.0974	3.40824e-39	7.2769e-37
Pdlim7	1100.84	1.77788	0.184039	9.66034	4.44384e-22	2.44713e-20
Slc2a1	9519.66	1.77617	0.135023	13.1546	1.60201e-39	3.4815e-37
Klc3	159.836	1.77479	0.310511	5.7157	1.09256e-08	1.22548e-07
Ccdc92	92.0523	1.77118	0.378727	4.67666	2.91587e-06	2.1559e-05
Dusp16	2479.29	1.76406	0.149552	11.7957	4.10855e-32	5.10215e-30
Mybpc3	32.2628	1.76356	0.601481	2.93203	0.0033675	0.0112558
Slc7a11	6836.4	1.76008	0.160802	10.9457	6.97127e-28	6.14786e-26
Fzd5	718.089	1.75946	0.259299	6.78545	1.15728e-11	1.93729e-10
Ptpn5	76.6896	1.75546	0.481807	3.6435	0.000268959	0.00125124
Rps6ka2	424.344	1.75421	0.240577	7.29169	3.06094e-13	6.31384e-12
Cpeb4	3315.52	1.74864	0.193465	9.03851	1.58826e-19	6.83007e-18
Notch1	469.748	1.73372	0.212656	8.15269	3.55916e-16	1.04123e-14
Nlgn2	645.721	1.72406	0.263152	6.5516	5.69234e-11	8.76909e-10
Dennd3	854.178	1.7213	0.195248	8.81598	1.18645e-18	4.52638e-17
Ptgs1	652.03	1.71163	0.196913	8.69234	3.55038e-18	1.2898e-16
Csf1	85.9484	1.70737	0.385527	4.42866	9.48222e-06	6.33915e-05
Slc5a3	14451.9	1.70641	0.512159	3.3318	0.000862857	0.00348638
Btg1	32773.2	1.70194	0.132823	12.8136	1.37641e-37	2.57705e-35
Adamtsl4	38.7794	1.69893	0.557184	3.04914	0.00229497	0.00803734
Zrsr1	407.203	1.692	0.212032	7.97994	1.464e-15	4.0128e-14
Dcbld2	4113.51	1.6915	0.162377	10.4171	2.07119e-25	1.55595e-23
Kdm7a	6404.65	1.68071	0.158273	10.6191	2.42967e-26	1.94533e-24
Plek	55355.9	1.67895	0.121753	13.7899	2.9325e-43	7.4351e-41
Rell2	31.0117	1.6783	0.622984	2.69397	0.00706061	0.0211228
Cyb561	121.881	1.67806	0.337809	4.96747	6.78311e-07	5.63869e-06
Rcan1	2427.29	1.67517	0.187275	8.94497	3.72061e-19	1.53491e-17
Sdc3	1476.19	1.66191	0.246927	6.73035	1.6926e-11	2.792e-10
F10	657.837	1.6481	0.268338	6.1419	8.15411e-10	1.09774e-08
Flnb	5850.89	1.64448	0.18475	8.90112	5.52842e-19	2.21319e-17
Cflar	10356.1	1.64342	0.153401	10.7133	8.82093e-27	7.30277e-25
Arid5a	542.426	1.64308	0.224155	7.33009	2.29997e-13	4.79292e-12
4930404N11Rik	53.6805	1.64137	0.501086	3.27563	0.00105428	0.00414215
Egr3	1057.01	1.641	0.235277	6.97478	3.06361e-12	5.56479e-11
Tanc2	708.017	1.63567	0.187593	8.71924	2.80071e-18	1.03287e-16
B4galt5	10039.7	1.62725	0.157406	10.3379	4.74927e-25	3.48184e-23
S100a11	11158.9	1.62512	0.165433	9.82338	8.92973e-23	5.22475e-21
Pld3	9971.5	1.62387	0.210832	7.70217	1.33773e-14	3.25604e-13
Tuba1a	1826.88	1.61805	0.467052	3.46438	0.000531454	0.0022875
Sertad1	740.068	1.60836	0.178507	9.01006	2.05935e-19	8.76305e-18
Col4a3bp	6920.93	1.60215	0.177845	9.00871	2.08502e-19	8.84137e-18
March9	760.9	1.5964	0.23196	6.88221	5.89303e-12	1.03489e-10
Nxpe4	117.222	1.59481	0.334071	4.77388	1.80709e-06	1.39456e-05
Pmepa1	217.789	1.59436	0.370435	4.30402	1.67724e-05	0.000106253
Sertad2	3004.85	1.58744	0.15492	10.2468	1.22338e-24	8.55665e-23
Jag1	716.055	1.58364	0.214126	7.39579	1.40568e-13	3.01712e-12
Mn1	189.29	1.58054	0.338446	4.67	3.01207e-06	2.22028e-05
Marcksl1	10629.8	1.58009	0.158888	9.94469	2.65991e-23	1.6432e-21
Mgarp	34.3576	1.57486	0.655944	2.40091	0.0163543	0.0430339
Dst	2987.84	1.5748	0.157233	10.0157	1.30058e-23	8.24381e-22
Tmc4	32.7541	1.57478	0.653395	2.41015	0.0159458	0.0421688
Itgam	17770.9	1.57455	0.136314	11.5509	7.3067e-31	8.08387e-29
Pard6b	459.126	1.57442	0.197553	7.96962	1.59164e-15	4.3334e-14
Junb	13307.4	1.57332	0.12479	12.6077	1.91518e-36	3.42761e-34
Tmem171	316.323	1.56737	0.297807	5.26306	1.4168e-07	1.34182e-06
Slc6a12	32357.1	1.56365	0.130524	11.9798	4.53248e-33	5.86811e-31
Pmaip1	2534.09	1.56284	0.142446	10.9714	5.24306e-28	4.78156e-26
Dgka	480.64	1.56157	0.269015	5.80477	6.4455e-09	7.4423e-08
Faah	68.7316	1.56029	0.489281	3.18894	0.00142797	0.00535212
E330009J07Rik	201.892	1.55412	0.268655	5.7848	7.25965e-09	8.35066e-08
Mvd	6294.78	1.55372	0.49649	3.12941	0.00175155	0.00638789
Cdk2ap2	2227.24	1.55059	0.135388	11.4529	2.27444e-30	2.44955e-28
Dpep2	6238.57	1.54557	0.174189	8.87293	7.12467e-19	2.80606e-17
Slc10a6	28.9178	1.54209	0.656681	2.34832	0.0188585	0.0484705
Nfkbiz	1623.36	1.53854	0.141104	10.9036	1.108e-27	9.56338e-26
Wipi1	148.41	1.53711	0.313211	4.90757	9.22116e-07	7.48643e-06
Coq10b	917.951	1.53361	0.185347	8.27429	1.29226e-16	3.95146e-15
Ptafr	1585.28	1.52669	0.186533	8.18455	2.7332e-16	8.13277e-15
Dhcr24	8961.15	1.5263	0.183331	8.3254	8.40423e-17	2.67048e-15
Idi1	2754.73	1.52386	0.172305	8.84397	9.23802e-19	3.5691e-17
1810062G17Rik	40.2453	1.51423	0.53168	2.848	0.00439942	0.0142056
C5ar1	4729.59	1.50933	0.136	11.0981	1.28175e-28	1.25798e-26
Plekhn1	954.874	1.50746	0.188314	8.00505	1.19418e-15	3.29551e-14
Mtmr11	122.865	1.50454	0.331799	4.53448	5.77453e-06	4.01577e-05
Gpr157	80.6078	1.49876	0.425901	3.51903	0.000433126	0.00190914
Elovl6	2865.65	1.48767	0.157179	9.46485	2.93985e-21	1.49699e-19
Hmgcs1	9136.75	1.48695	0.427801	3.47581	0.000509314	0.00220739
Mt2	6576.35	1.48456	0.186057	7.97904	1.47474e-15	4.03315e-14
Abhd14b	85.6069	1.48389	0.540135	2.74726	0.00600959	0.0184642
Bcorl1	646.033	1.48344	0.207056	7.16446	7.80935e-13	1.5329e-11
Smim3	666.541	1.4829	0.191007	7.7636	8.25548e-15	2.07581e-13
Spty2d1	2953.51	1.46807	0.148096	9.91298	3.65567e-23	2.22448e-21
Nfkbie	2323.62	1.46548	0.18849	7.77486	7.55299e-15	1.91102e-13
Spry2	355.563	1.46159	0.22987	6.35832	2.03971e-10	2.94464e-09
Il13ra1	3101.77	1.45737	0.199563	7.30283	2.81784e-13	5.83215e-12
Icam5	64.963	1.4476	0.447516	3.23474	0.00121753	0.00468459
Ak4	1723.13	1.44726	0.167097	8.6612	4.66825e-18	1.67096e-16
Ubc	2254.45	1.4469	0.143687	10.0699	7.50904e-24	4.8869e-22
Gfpt1	5590.23	1.44581	0.181944	7.94644	1.9195e-15	5.16822e-14
Cxxc5	33.8117	1.44283	0.59467	2.42626	0.0152553	0.0406252
Myo1d	3330.42	1.44138	0.184347	7.81881	5.33235e-15	1.36909e-13
Stap1	11824.8	1.43984	0.14058	10.2421	1.28369e-24	8.92715e-23
Hmox1	6380.7	1.43863	0.160951	8.93831	3.95181e-19	1.61388e-17
Aacs	4335.61	1.43348	0.189028	7.58345	3.36477e-14	7.71172e-13
Tns3	25516.1	1.42705	0.148612	9.60253	7.8003e-22	4.16358e-20
Ppp1r13l	936.51	1.42702	0.175002	8.15432	3.5115e-16	1.02976e-14
Lrrk2	4352.66	1.41994	0.169321	8.38607	5.02651e-17	1.64442e-15
Gpr132	1190.6	1.4183	0.236988	5.98469	2.16802e-09	2.69233e-08
Abhd14a	217.46	1.41666	0.374699	3.7808	0.000156325	0.000775888
Xylt1	628.755	1.41563	0.240211	5.89328	3.786e-09	4.51722e-08
Jun	7851.73	1.4112	0.192841	7.31795	2.51796e-13	5.22928e-12
Usp53	572.308	1.41076	0.192284	7.33688	2.18633e-13	4.56391e-12
Ahdc1	673.545	1.41033	0.179798	7.84394	4.36617e-15	1.13297e-13
Ankrd37	261.481	1.40895	0.306618	4.59513	4.32475e-06	3.08874e-05
A630033H20Rik	2949.66	1.40577	0.196166	7.16623	7.70886e-13	1.51562e-11
Tmem189	9500.75	1.40526	0.121874	11.5305	9.26415e-31	1.01572e-28
Cd300ld	12579.6	1.4031	0.143961	9.74643	1.91078e-22	1.09175e-20
Itga5	6518.4	1.3996	0.151398	9.24451	2.36322e-20	1.10193e-18
Phldb1	2669.55	1.39959	0.142373	9.83046	8.32374e-23	4.94146e-21
Dbn1	65.2764	1.39805	0.421825	3.31428	0.000918796	0.00367458
Ddah2	37.7158	1.39673	0.587065	2.37917	0.0173516	0.0451989
Cd86	180.317	1.39668	0.280003	4.98808	6.09815e-07	5.12531e-06
Chst3	780.45	1.39295	0.236634	5.88652	3.94422e-09	4.67687e-08
Tmem120b	541.011	1.39287	0.18004	7.73644	1.02242e-14	2.54976e-13
Rras	1152.8	1.39281	0.202147	6.8901	5.57525e-12	9.81922e-11
Tmc8	163.867	1.39207	0.343321	4.05472	5.0195e-05	0.000281898
Hmx3	36.3729	1.39182	0.586079	2.37481	0.0175582	0.0456197
Hmgcr	13594.8	1.38964	0.156269	8.89262	5.96837e-19	2.37369e-17
Gadd45b	814.086	1.38897	0.254327	5.46133	4.72574e-08	4.83296e-07
Cd80	380.588	1.38565	0.223293	6.20554	5.451e-10	7.48519e-09
Per1	2546.7	1.37892	0.153979	8.95522	3.39054e-19	1.41311e-17
Stac2	1187.08	1.37597	0.1782	7.72149	1.14982e-14	2.84682e-13
Zswim4	2140.65	1.37503	0.139119	9.88384	4.89192e-23	2.93274e-21
Arl5b	887.326	1.37464	0.178031	7.72137	1.15089e-14	2.84682e-13
Acss2	2559.77	1.36965	0.498037	2.75009	0.00595781	0.0183422
Rnf19b	5054.36	1.36793	0.118701	11.5242	9.96324e-31	1.08261e-28
Ptpn22	6252.65	1.36685	0.205237	6.65985	2.74105e-11	4.39381e-10
Insig1	5871.06	1.36639	0.199855	6.83692	8.09134e-12	1.38303e-10
Kif3c	2486.7	1.36536	0.147365	9.26513	1.94848e-20	9.29922e-19
Sema4g	616.406	1.36469	0.291452	4.68237	2.83575e-06	2.1005e-05
Prrg4	880.383	1.36345	0.227262	5.99948	1.97946e-09	2.47839e-08
Ampd3	1740.92	1.36228	0.195042	6.98454	2.8579e-12	5.23017e-11
St3gal6	5201.88	1.35758	0.133041	10.2042	1.89872e-24	1.27665e-22
Agpat4	1443.54	1.35533	0.149602	9.05954	1.31006e-19	5.67383e-18
Golgb1	4093.51	1.35357	0.174023	7.77811	7.36181e-15	1.87042e-13
Synpo	1381	1.34953	0.193441	6.97648	3.02677e-12	5.50611e-11
Gpr68	564.976	1.34487	0.193445	6.95221	3.59619e-12	6.4742e-11
Fcgr4	251.215	1.34397	0.382624	3.51249	0.000443922	0.00195319
Cdk18	7350.07	1.34273	0.134845	9.95759	2.33665e-23	1.45831e-21
Soga1	3099.06	1.34096	0.160257	8.36754	5.88342e-17	1.91447e-15
Arhgap23	765.409	1.3397	0.191861	6.98266	2.89635e-12	5.28465e-11
Kcnk6	2980.62	1.33723	0.152534	8.76671	1.83968e-18	6.8722e-17
Dusp18	965.712	1.33613	0.190544	7.01215	2.34692e-12	4.38067e-11
Irgq	1846.87	1.33609	0.165012	8.09695	5.63536e-16	1.60614e-14
Ifi202b	1701.21	1.33396	0.217144	6.14319	8.08793e-10	1.09245e-08
Malat1	18123.7	1.33387	0.531035	2.51184	0.0120104	0.0332499
Creb3l2	601.167	1.33353	0.185695	7.1813	6.90532e-13	1.36204e-11
Nabp1	440.834	1.33279	0.233726	5.70238	1.18149e-08	1.31794e-07
Ppard	1625.43	1.32982	0.145459	9.14219	6.12009e-20	2.74839e-18
Irak2	5802.48	1.32944	0.128883	10.3151	6.02045e-25	4.38736e-23
Kctd12	2925.36	1.32761	0.17415	7.6234	2.47089e-14	5.82766e-13
Itgb2	22118.1	1.32589	0.126067	10.5174	7.1827e-26	5.60342e-24
Fasn	23772.3	1.3219	0.168664	7.83746	4.59738e-15	1.18538e-13
Ldlr	12518.8	1.31986	0.156529	8.43206	3.39619e-17	1.1262e-15
Acat2	2915.98	1.31173	0.226967	5.7794	7.49662e-09	8.60697e-08
Pitpnm1	2515.1	1.30953	0.166246	7.87705	3.35195e-15	8.81063e-14
Cd24a	103.361	1.30808	0.339692	3.85077	0.000117748	0.000605149
Amigo3	70.5666	1.30691	0.428859	3.04742	0.00230816	0.00807426
Grin1	69.1891	1.30634	0.46152	2.83053	0.0046471	0.0148986
Ercc6	2420.21	1.30503	0.158845	8.21571	2.10906e-16	6.30645e-15
Srxn1	3843.27	1.30478	0.193233	6.75233	1.45488e-11	2.41554e-10
Ugcg	2346.16	1.30344	0.136467	9.55132	1.28055e-21	6.74645e-20
Zc3h12a	1030.27	1.30185	0.1517	8.58175	9.3441e-18	3.24908e-16
Pvrl2	970.92	1.30149	0.188154	6.91715	4.60833e-12	8.19933e-11
F11r	46.4496	1.29809	0.503967	2.57574	0.0100027	0.0284556
Hsd17b7	2303.78	1.29281	0.153858	8.40258	4.36781e-17	1.43666e-15
Fdft1	3941.52	1.29238	0.193018	6.69561	2.14772e-11	3.4804e-10
Lcp2	19868.6	1.29232	0.111153	11.6264	3.02455e-31	3.5056e-29
Lims2	373.716	1.28911	0.2509	5.13793	2.77784e-07	2.48758e-06
Tmem198	57.0172	1.28823	0.45714	2.81801	0.00483216	0.0153918
Zswim6	1367.48	1.2869	0.163688	7.86196	3.78176e-15	9.85525e-14
Prokr1	161.99	1.28142	0.316456	4.04928	5.13758e-05	0.000287733
Ptger2	69.6085	1.28142	0.459309	2.78988	0.00527268	0.0165767
Filip1l	942.328	1.28076	0.196906	6.50442	7.79927e-11	1.18646e-09
Mex3a	398.596	1.28064	0.210998	6.06943	1.28362e-09	1.66011e-08
Rhof	1944.96	1.28027	0.164164	7.79871	6.25424e-15	1.59679e-13
Pstpip2	7116.06	1.27783	0.138164	9.24869	2.27252e-20	1.06372e-18
Tnfrsf22	576.609	1.27614	0.179746	7.09968	1.25049e-12	2.4004e-11
Flot1	1405.64	1.27583	0.226688	5.62814	1.82165e-08	1.96364e-07
Gstp1	498.763	1.2748	0.208667	6.10923	1.00111e-09	1.32286e-08
Vav3	4175.14	1.27423	0.15371	8.28984	1.13403e-16	3.54786e-15
Dock10	8896.67	1.27191	0.134461	9.45931	3.09995e-21	1.56541e-19
Ehd1	10408.7	1.27188	0.13123	9.692	3.2608e-22	1.82036e-20
Lilrb4a	30526.1	1.26654	0.152603	8.29957	1.04488e-16	3.27736e-15
Ldlrad4	220.501	1.26466	0.274422	4.60846	4.05658e-06	2.91432e-05
Chpf	1493.94	1.26387	0.185118	6.82738	8.64768e-12	1.47192e-10
Txnrd3	188.572	1.26292	0.264973	4.76622	1.8771e-06	1.44493e-05
Tnfaip3	1277.27	1.26238	0.155511	8.11767	4.75234e-16	1.36728e-14
Sntb2	2947.25	1.26197	0.150934	8.3611	6.21371e-17	2.01119e-15
Frs3	109.998	1.26137	0.33706	3.74226	0.000182375	0.000892084
Snta1	1755.31	1.25842	0.189135	6.65352	2.8617e-11	4.55849e-10
H60b	799.368	1.25778	0.177587	7.08262	1.41454e-12	2.70251e-11
Cyp51	7318.97	1.25645	0.182769	6.8745	6.22073e-12	1.08773e-10
Rilpl2	4896.62	1.25562	0.174678	7.1882	6.5652e-13	1.29705e-11
Trp53inp2	1787.34	1.25224	0.204077	6.13613	8.45542e-10	1.13329e-08
Dcun1d3	866.355	1.25102	0.169444	7.38312	1.54626e-13	3.28985e-12
Zc3h12c	1570.25	1.25052	0.165868	7.53924	4.72703e-14	1.07128e-12
Atxn1	674.006	1.25051	0.167317	7.47394	7.78309e-14	1.71906e-12
Skil	5523.27	1.25028	0.142622	8.76642	1.84444e-18	6.8722e-17
Atp7a	4919.27	1.24663	0.150651	8.27493	1.28533e-16	3.94017e-15
E430018J23Rik	247.571	1.24522	0.245919	5.06354	4.11535e-07	3.57486e-06
Doc2g	48.5315	1.2424	0.480991	2.583	0.00979441	0.0279348
Tmem132a	718.071	1.24178	0.176609	7.03126	2.04676e-12	3.85589e-11
Zbtb4	3202.3	1.23787	0.17767	6.96729	3.23109e-12	5.86026e-11
Mamld1	46.7949	1.23782	0.511097	2.42189	0.01544	0.0410632
Clcn2	43.4175	1.23679	0.519453	2.38094	0.0172684	0.0450399
Atp6v0a1	4145.05	1.23311	0.167586	7.35805	1.86611e-13	3.92237e-12
Zfp516	2120.1	1.23286	0.135485	9.09956	9.06984e-20	4.01382e-18
Tmem170	139.341	1.23282	0.321408	3.8357	0.000125208	0.000638634
Adgre5	359.815	1.23	0.314167	3.91512	9.03575e-05	0.00047936
Tmem26	875.662	1.22501	0.256028	4.78469	1.71248e-06	1.3266e-05
Ccl6	121.341	1.22303	0.3315	3.68938	0.000224805	0.0010687
Pik3r3	234.046	1.22057	0.241928	5.04516	4.53137e-07	3.90281e-06
Rhbdf2	5231.56	1.21961	0.13816	8.82753	1.0701e-18	4.12124e-17
Hspa5	65106.1	1.21941	0.129013	9.45187	3.32841e-21	1.67383e-19
Sec24d	2992.06	1.21879	0.158524	7.68835	1.49041e-14	3.59886e-13
Eps8	4221.08	1.21861	0.165792	7.35022	1.97877e-13	4.152e-12
Hip1r	48.3977	1.21248	0.495863	2.44519	0.0144774	0.0389026
Slc12a5	121.008	1.21164	0.316033	3.8339	0.000126128	0.000642517
Atg2a	3309.59	1.20563	0.147973	8.14763	3.71112e-16	1.08308e-14
Nudt18	1048.09	1.2039	0.16069	7.49204	6.78122e-14	1.50323e-12
Aoc2	151.4	1.20272	0.316877	3.79554	0.00014732	0.000736601
Nlrp3	6001.66	1.20161	0.155452	7.72977	1.07737e-14	2.68131e-13
Rab11fip1	1660.2	1.20096	0.136099	8.82415	1.10298e-18	4.23449e-17
Furin	8669.05	1.19969	0.143332	8.37	5.76192e-17	1.87996e-15
Plekho2	18584.7	1.19962	0.134386	8.92668	4.38982e-19	1.7808e-17
Ptprs	15746.6	1.19691	0.113861	10.512	7.60612e-26	5.89596e-24
Ppfia3	211.255	1.19438	0.268173	4.45378	8.43722e-06	5.69185e-05
Kcnc3	661.723	1.19431	0.178838	6.67814	2.41987e-11	3.90064e-10
Zbed6	1561.33	1.19251	0.183386	6.50272	7.88798e-11	1.19846e-09
Sdc4	9465.95	1.19208	0.126523	9.42187	4.43136e-21	2.20121e-19
Ier5	5717.41	1.19143	0.210631	5.65649	1.54501e-08	1.68786e-07
Sez6l2	88.7691	1.18815	0.378118	3.14226	0.00167646	0.00614622
P2ry2	1129.4	1.18808	0.159421	7.45247	9.1612e-14	2.01249e-12
Rad54l2	2590.6	1.185	0.147137	8.05375	8.0296e-16	2.25682e-14
Bmp2	51.9601	1.18486	0.500221	2.36866	0.0178524	0.0462559
Osgin2	3010.73	1.18469	0.187565	6.31615	2.68156e-10	3.81246e-09
Tjp2	2253.91	1.18173	0.162004	7.29446	2.99859e-13	6.19574e-12
Cd36	2557.57	1.18168	0.128657	9.18472	4.1261e-20	1.89489e-18
Igsf3	255.969	1.18078	0.246231	4.7954	1.62354e-06	1.26414e-05
AF251705	1539.81	1.17934	0.152981	7.70909	1.26719e-14	3.1218e-13
Dnajb2	856.703	1.17897	0.157138	7.50275	6.24921e-14	1.40061e-12
Star	51.1318	1.1774	0.469842	2.50594	0.0122125	0.0337328
Il4ra	300.089	1.17568	0.267066	4.40222	1.07148e-05	7.08308e-05
Pip5k1b	3874.18	1.17011	0.171263	6.83221	8.36138e-12	1.42718e-10
Ston1	651.769	1.16981	0.187064	6.2535	4.01345e-10	5.6532e-09
Tmem50b	2973.55	1.16777	0.160931	7.25632	3.97753e-13	8.08123e-12
Mitf	7122.48	1.16737	0.140915	8.28427	1.18836e-16	3.6988e-15
Emilin2	14095.5	1.1662	0.113533	10.2719	9.42924e-25	6.71075e-23
Hk1	9307.61	1.16415	0.149579	7.78287	7.08992e-15	1.80511e-13
Bet1l	882.325	1.16395	0.179909	6.46967	9.82196e-11	1.47233e-09
St3gal1	3576.89	1.16272	0.126263	9.20867	3.30192e-20	1.53376e-18
Cxcr4	2514.93	1.16088	0.230496	5.03644	4.74264e-07	4.06751e-06
Apbb3	911.341	1.16028	0.180281	6.43593	1.22721e-10	1.80813e-09
Creb5	300.644	1.15931	0.219413	5.2837	1.26598e-07	1.2141e-06
Homer1	821.779	1.15694	0.163298	7.08489	1.39156e-12	2.66279e-11
Bcl2l1	4781.37	1.15692	0.135005	8.56942	1.04007e-17	3.60616e-16
Zfyve1	1494.62	1.15613	0.169316	6.82821	8.59786e-12	1.46549e-10
Lamc1	8333.63	1.15191	0.177622	6.48517	8.86299e-11	1.33825e-09
Bnip3	2297.62	1.15162	0.155766	7.39329	1.43244e-13	3.06375e-12
Klf7	416.487	1.15154	0.219812	5.23874	1.61679e-07	1.51473e-06
Ticam1	1792.42	1.14932	0.155133	7.4086	1.27639e-13	2.75908e-12
Daam1	1274.85	1.14465	0.166224	6.88619	5.73069e-12	1.00784e-10
Pmvk	1702.95	1.14107	0.185662	6.14593	7.94985e-10	1.075e-08
Tns2	52.2668	1.14082	0.470356	2.42545	0.0152896	0.0407075
Dnajb5	341.175	1.14015	0.232122	4.91186	9.02187e-07	7.33441e-06
Rusc2	4537.45	1.13936	0.142595	7.99023	1.34683e-15	3.69997e-14
Zfp609	2019.54	1.13816	0.149684	7.60378	2.87604e-14	6.69244e-13
Stk40	2148.58	1.1372	0.131002	8.68079	3.93013e-18	1.4235e-16
Basp1	7846.12	1.13671	0.131402	8.65061	5.12244e-18	1.82815e-16
Sema4c	621.813	1.13489	0.178025	6.37488	1.83106e-10	2.67195e-09
Emp2	236.419	1.13407	0.294662	3.84873	0.000118733	0.000609951
2310047M10Rik	1260.43	1.13284	0.191488	5.916	3.29859e-09	3.9984e-08
Zswim8	4617.64	1.12936	0.148915	7.58394	3.35216e-14	7.69732e-13
Ptk2b	10804.8	1.12866	0.130255	8.66496	4.51663e-18	1.63108e-16
Hgsnat	4177.88	1.12828	0.128586	8.77452	1.71641e-18	6.46709e-17
Hist1h2bc	235.514	1.1251	0.296621	3.79305	0.000148805	0.000742501
Slc6a13	2273.79	1.12454	0.133236	8.4402	3.16798e-17	1.0534e-15
Rc3h1	6395.64	1.12133	0.188808	5.93902	2.86731e-09	3.49651e-08
Sec23a	2388.39	1.12119	0.146664	7.64463	2.09544e-14	5.01012e-13
Zxda	163.231	1.12089	0.296212	3.78407	0.000154283	0.000767318
Unc13a	93.7019	1.11853	0.355151	3.14946	0.00163575	0.00601073
Lilr4b	10871	1.11835	0.146602	7.62853	2.37445e-14	5.63296e-13
Plagl2	3497.16	1.11602	0.137666	8.10672	5.20039e-16	1.48915e-14
Ppp2r5b	1286.3	1.11578	0.159464	6.99704	2.61434e-12	4.8427e-11
Aff4	7200.84	1.1148	0.138647	8.0406	8.93967e-16	2.49532e-14
Sema4b	1756.87	1.11215	0.139449	7.97533	1.51974e-15	4.14693e-14
Micall1	2444.85	1.10743	0.153098	7.23347	4.70792e-13	9.50171e-12
Tcaf1	532.484	1.10679	0.201054	5.50494	3.69295e-08	3.85117e-07
Parp3	886.462	1.10485	0.216262	5.10887	3.24093e-07	2.87479e-06
Tgoln1	4433.98	1.10258	0.124103	8.88441	6.42587e-19	2.53905e-17
Pabpc1l	68.2749	1.1025	0.469335	2.34907	0.0188204	0.0483929
Vps37a	2009.48	1.10221	0.130953	8.41686	3.86716e-17	1.27543e-15
Hipk2	2202.94	1.10197	0.212118	5.19506	2.04649e-07	1.88252e-06
Tmem63b	1956.14	1.10155	0.166484	6.61656	3.6766e-11	5.77345e-10
Plcd3	664.712	1.10147	0.173478	6.34932	2.16272e-10	3.11483e-09
Nudt8	411.587	1.09901	0.19461	5.64727	1.63019e-08	1.77455e-07
Map1b	85.7819	1.09865	0.435496	2.52274	0.0116443	0.0323615
Dgkh	169.883	1.09848	0.294398	3.73128	0.000190513	0.000927044
Lpl	76985.7	1.09419	0.132676	8.24708	1.62317e-16	4.90172e-15
Plekhm3	9155.75	1.09009	0.128272	8.49828	1.92414e-17	6.57773e-16
Ptpre	2091.66	1.08986	0.167221	6.51747	7.15043e-11	1.09323e-09
Dusp10	138.371	1.08911	0.302683	3.59817	0.000320464	0.00145796
Spag9	10014.5	1.08888	0.146656	7.42473	1.13011e-13	2.46036e-12
H13	11163.3	1.08823	0.112675	9.65809	4.54261e-22	2.46802e-20
Sacs	149.691	1.08779	0.311496	3.49214	0.000479171	0.0020894
Zxdb	314.055	1.08726	0.217482	4.99928	5.75445e-07	4.8532e-06
Dusp4	4512.63	1.08713	0.148855	7.3033	2.80796e-13	5.82162e-12
Sc5d	2805.03	1.08663	0.179747	6.04536	1.49081e-09	1.91181e-08
Birc3	4831.19	1.08523	0.143086	7.58447	3.33861e-14	7.6807e-13
Cd164	3778.5	1.0852	0.129288	8.39362	4.71407e-17	1.54637e-15
Smox	2918.17	1.08189	0.142862	7.573	3.64716e-14	8.31198e-13
Camk2d	1194.57	1.08111	0.217221	4.97701	6.45751e-07	5.39012e-06
Fkbp14	179.045	1.0811	0.267412	4.04283	5.2811e-05	0.000294578
Csf2rb	3204.05	1.08095	0.150636	7.17587	7.18495e-13	1.4149e-11
Zyx	2262.83	1.08038	0.164111	6.58324	4.60319e-11	7.15463e-10
Dok4	107.595	1.08027	0.347904	3.10509	0.00190223	0.00684712
Etv3	6826.37	1.0801	0.119361	9.04904	1.44236e-19	6.22466e-18
Dapk1	8451.6	1.07957	0.181979	5.93237	2.98587e-09	3.6338e-08
Stx11	274.884	1.0788	0.23668	4.55804	5.16326e-06	3.63009e-05
Mogat1	158.528	1.07834	0.287161	3.75518	0.000173216	0.000850702
Pip5k1a	5161.73	1.07766	0.129401	8.32806	8.21795e-17	2.625e-15
Sidt2	4394.33	1.07721	0.166798	6.4582	1.05955e-10	1.57829e-09
Cd44	23060.2	1.07675	0.148532	7.24928	4.18982e-13	8.49112e-12
Mafk	2980.73	1.0747	0.139506	7.70359	1.32297e-14	3.23953e-13
Acsl4	11057.7	1.07301	0.12568	8.53767	1.36957e-17	4.70837e-16
Syk	5322.46	1.0708	0.132102	8.10585	5.23764e-16	1.49629e-14
Otud7b	4016.51	1.07074	0.136708	7.83229	4.79074e-15	1.23263e-13
Spryd7	2702.6	1.07043	0.156048	6.85963	6.90406e-12	1.1952e-10
Azin2	86.403	1.0698	0.384471	2.78253	0.00539377	0.0168963
Ets2	18922.1	1.06973	0.119898	8.92206	4.57674e-19	1.85046e-17
Fam210b	524.927	1.06936	0.238866	4.4768	7.57713e-06	5.17183e-05
Jarid2	2568.84	1.06823	0.155744	6.85892	6.93823e-12	1.19941e-10
Hif1a	10091.8	1.06691	0.149028	7.15916	8.11748e-13	1.58571e-11
Chka	998.531	1.06583	0.17634	6.04416	1.50193e-09	1.92405e-08
Macf1	11433.5	1.06559	0.180637	5.89905	3.65592e-09	4.38782e-08
Crebl2	472.875	1.06406	0.212317	5.01163	5.39699e-07	4.57391e-06
Epb4.1l5	375.212	1.06187	0.22354	4.75026	2.03151e-06	1.55103e-05
Baz2a	3322.97	1.06147	0.148196	7.16261	7.91536e-13	1.55121e-11
Sqstm1	53198	1.05983	0.139512	7.59665	3.03901e-14	7.04471e-13
Slc23a2	13278.6	1.05921	0.185429	5.71219	1.11529e-08	1.24983e-07
Ppp1r13b	874.226	1.05911	0.170003	6.22995	4.66569e-10	6.48191e-09
Axl	69.0249	1.05731	0.439313	2.40674	0.0160958	0.0425192
Rdh11	2321.4	1.05325	0.136689	7.70542	1.30418e-14	3.19997e-13
Plekhg2	275.108	1.05143	0.258905	4.06104	4.88536e-05	0.000275254
1810021B22Rik	80.1902	1.0492	0.407665	2.57368	0.0100625	0.0285855
Tnfaip2	17159.5	1.04833	0.126151	8.31011	9.5611e-17	3.0223e-15
Kremen1	855.955	1.04623	0.171702	6.09329	1.10616e-09	1.45064e-08
Acaca	4890.63	1.04595	0.129991	8.04637	8.52854e-16	2.38603e-14
Ppp1r15a	2051.82	1.04595	0.17266	6.05782	1.37977e-09	1.77504e-08
Vprbp	1671.04	1.04423	0.143831	7.26012	3.86755e-13	7.87092e-12
Adcy7	23802.3	1.04388	0.133659	7.81001	5.71847e-15	1.46513e-13
Map1lc3a	863.96	1.04289	0.265727	3.92467	8.68503e-05	0.000462771
Usp27x	120.602	1.04252	0.328529	3.17329	0.0015072	0.00560594
Myadm	16687.1	1.04178	0.115465	9.02254	1.83784e-19	7.84789e-18
Smagp	808.413	1.04082	0.211608	4.91863	8.71532e-07	7.11849e-06
Il27	140.879	1.03857	0.294038	3.53208	0.000412311	0.00183132
Tob1	1177.4	1.03742	0.190491	5.44605	5.15017e-08	5.21444e-07
Nsdhl	3428.82	1.03739	0.196948	5.26736	1.384e-07	1.3128e-06
Lss	5228.78	1.03721	0.192791	5.37996	7.45021e-08	7.40156e-07
Trip10	1155.94	1.03628	0.157101	6.59628	4.21602e-11	6.58652e-10
Ccdc114	69.1323	1.03388	0.420892	2.4564	0.0140336	0.037852
Slc16a3	7094.97	1.03336	0.130167	7.93877	2.04204e-15	5.486e-14
Mycbp2	7088.34	1.03244	0.150057	6.88034	5.971e-12	1.04708e-10
Zfp9	128.578	1.02723	0.311173	3.30117	0.000962832	0.00382306
Gatsl2	1310.19	1.0272	0.142811	7.19273	6.35076e-13	1.25673e-11
Tnfsf9	4874.16	1.02699	0.118548	8.6631	4.59099e-18	1.652e-16
Wfs1	198.791	1.0259	0.259753	3.94951	7.83122e-05	0.000421521
Vps37c	2112.73	1.02562	0.14666	6.99316	2.68754e-12	4.95566e-11
Eml5	276.724	1.02551	0.246655	4.15765	3.21535e-05	0.000189129
Snap29	3933.12	1.02529	0.178868	5.73209	9.91996e-09	1.11991e-07
Lrp12	1685.47	1.02501	0.138812	7.38418	1.53392e-13	3.26933e-12
Ttc9	143.728	1.02281	0.301392	3.39362	0.000689743	0.00286686
Tnks1bp1	1009.42	1.0225	0.152748	6.69406	2.17055e-11	3.51272e-10
Atp2a3	5711.88	1.02069	0.126106	8.09396	5.77537e-16	1.6422e-14
Ptprj	7165.06	1.01935	0.122327	8.33297	7.88371e-17	2.52486e-15
Dedd2	689.277	1.01636	0.166119	6.11822	9.46265e-10	1.25721e-08
Aldoc	9020.35	1.01354	0.215434	4.70466	2.54296e-06	1.89871e-05
Prkd2	684.869	1.01268	0.171157	5.91667	3.28534e-09	3.9863e-08
Hivep1	2178.47	1.01244	0.136708	7.40591	1.30257e-13	2.81069e-12
Fdps	15707	1.0107	0.159845	6.323	2.56533e-10	3.66003e-09
Tnip1	6047.42	1.00983	0.124464	8.11343	4.921e-16	1.41247e-14
Arid5b	761.413	1.00951	0.185033	5.45584	4.87428e-08	4.95986e-07
Sertad3	224.4	1.00933	0.249075	4.05231	5.07149e-05	0.000284555
Cd276	2856.5	1.0093	0.163711	6.16516	7.04103e-10	9.58493e-09
Ell	1918.28	1.00905	0.134173	7.5205	5.45654e-14	1.22974e-12
Arhgap25	1670.84	1.0075	0.149998	6.71676	1.85804e-11	3.04749e-10
Slc41a1	1231.09	1.00728	0.146493	6.87597	6.15679e-12	1.0781e-10
Cd52	8749.91	1.00646	0.135921	7.40468	1.31466e-13	2.82674e-12
Atp1b3	29941.9	1.0049	0.114459	8.7796	1.64056e-18	6.20051e-17
Creld1	1869.79	1.00425	0.135041	7.43665	1.03274e-13	2.26458e-12
Srgap3	829.111	1.00306	0.188898	5.31005	1.09594e-07	1.06361e-06
Ell2	4733.68	1.00254	0.145317	6.89898	5.23783e-12	9.25173e-11
Rapgef5	2586.07	1.00213	0.132114	7.58537	3.31532e-14	7.64155e-13
Qpct	556.673	1.00208	0.212999	4.70465	2.54306e-06	1.89871e-05
Acvrl1	1113.4	1.00127	0.166253	6.02259	1.71648e-09	2.17374e-08
Phc3	2852.6	0.999757	0.14897	6.71113	1.93128e-11	3.15909e-10
Parp4	2339.52	0.998162	0.156908	6.36143	1.99881e-10	2.89589e-09
Mboat7	2451.75	0.998014	0.131537	7.58732	3.26587e-14	7.54187e-13
Ago2	6104.39	0.997746	0.160809	6.20455	5.48543e-10	7.51776e-09
Prmt2	913.653	0.997432	0.177965	5.60465	2.08676e-08	2.23358e-07
Plec	28025.8	0.996836	0.183215	5.44081	5.30379e-08	5.35661e-07
Tulp4	6291.62	0.996193	0.139974	7.11699	1.10313e-12	2.13096e-11
Slc30a4	3435.73	0.996102	0.132896	7.49536	6.61149e-14	1.47366e-12
Sat1	10609.4	0.995494	0.189833	5.24406	1.57085e-07	1.47623e-06
Sec24a	2123.89	0.995088	0.166715	5.9688	2.39003e-09	2.94997e-08
Abl2	6534.42	0.994866	0.145915	6.8181	9.22512e-12	1.56147e-10
Clec7a	3038.78	0.994501	0.199232	4.99167	5.98579e-07	5.03784e-06
Rabgap1l	218.809	0.994083	0.248921	3.99356	6.50886e-05	0.000356641
Rab20	425.103	0.993755	0.207752	4.78338	1.72369e-06	1.33359e-05
Vwf	362.413	0.993567	0.243348	4.08291	4.44745e-05	0.000252451
Gpr107	3335.22	0.993145	0.126123	7.87442	3.42332e-15	8.97884e-14
Deb1	516.317	0.992191	0.191496	5.18125	2.20399e-07	2.01674e-06
Cpeb3	396.872	0.990925	0.209336	4.73366	2.20502e-06	1.66782e-05
3110043O21Rik	2489.62	0.990622	0.139408	7.1059	1.19542e-12	2.2983e-11
Cd40	221.301	0.988815	0.306601	3.22509	0.00125935	0.00481504
H2-DMa	636.111	0.988683	0.185596	5.32708	9.98064e-08	9.74053e-07
Pnpla2	3580.3	0.986507	0.140439	7.02443	2.14935e-12	4.03044e-11
Ndel1	3374.07	0.986075	0.137789	7.15641	8.28144e-13	1.61515e-11
4632428N05Rik	7965.45	0.984346	0.180658	5.44868	5.07438e-08	5.14199e-07
Zfp36l1	3783.31	0.984138	0.16701	5.89267	3.79999e-09	4.52946e-08
Msmo1	9779.51	0.982344	0.18379	5.34493	9.04516e-08	8.88455e-07
Agrn	1598.24	0.981307	0.158056	6.20859	5.34632e-10	7.36027e-09
Bsdc1	2428.28	0.981096	0.13237	7.41177	1.24622e-13	2.69866e-12
Asb1	953.358	0.981088	0.160883	6.09814	1.07311e-09	1.40882e-08
Kif1b	3495.88	0.980651	0.144015	6.80936	9.80311e-12	1.657e-10
Kif13a	644.192	0.980159	0.184654	5.30808	1.10784e-07	1.07259e-06
Tmem170b	3122.67	0.97821	0.142848	6.8479	7.49424e-12	1.28639e-10
Tiam1	132.501	0.976975	0.324034	3.01504	0.00256946	0.00886096
Ptpn12	5949.67	0.976762	0.132557	7.3686	1.7243e-13	3.64318e-12
Nos2	368.807	0.973344	0.212879	4.57229	4.82414e-06	3.40939e-05
Dnajb4	938.516	0.972594	0.16332	5.95515	2.59832e-09	3.19087e-08
Slc12a4	4643.49	0.969847	0.127436	7.61047	2.73093e-14	6.38595e-13
Stat3	3882.34	0.969381	0.145022	6.68437	2.31919e-11	3.74828e-10
Olfr933	149.707	0.969238	0.355634	2.72538	0.00642276	0.0195168
Rsbn1	3739.93	0.968558	0.161884	5.98304	2.19014e-09	2.71426e-08
Map3k12	439.959	0.967576	0.266793	3.62669	0.000287076	0.00132488
Tcf7l2	263.976	0.967524	0.230157	4.20376	2.6252e-05	0.00015879
Pcyt1a	5621.57	0.967464	0.142465	6.79088	1.11453e-11	1.87605e-10
Acbd4	1034.76	0.967045	0.159519	6.06226	1.34222e-09	1.72855e-08
Rnf24	1414.57	0.96671	0.151666	6.37392	1.84251e-10	2.68513e-09
Sqle	8324.46	0.966677	0.165669	5.83499	5.37945e-09	6.28895e-08
Armc7	835.635	0.966563	0.158878	6.08369	1.17449e-09	1.53365e-08
Grk5	540.917	0.965232	0.184855	5.22157	1.77417e-07	1.65327e-06
Qsox1	3138.53	0.965023	0.140381	6.87429	6.23005e-12	1.0878e-10
Wsb2	4979.27	0.965008	0.138143	6.98558	2.83681e-12	5.19939e-11
Rilp	74.118	0.964551	0.411614	2.34334	0.0191121	0.0490705
Orai1	1167.82	0.963211	0.15109	6.3751	1.82849e-10	2.6714e-09
Hsph1	6684.38	0.962721	0.154372	6.23637	4.47854e-10	6.24328e-09
Fgd6	1900.96	0.961987	0.164479	5.84871	4.95396e-09	5.80826e-08
Glcci1	522.609	0.961676	0.200086	4.80632	1.53731e-06	1.20161e-05
Dagla	578.22	0.96127	0.185697	5.17655	2.26028e-07	2.06358e-06
Myof	17662.3	0.959874	0.160446	5.98254	2.1969e-09	2.71986e-08
Rbpj	15382.3	0.959866	0.1175	8.16909	3.10715e-16	9.17815e-15
Phf1	810.797	0.959483	0.200407	4.78766	1.68733e-06	1.30971e-05
Ficd	314.203	0.95948	0.228408	4.20073	2.66055e-05	0.000160689
Zfp318	1999.05	0.95859	0.156097	6.141	8.20036e-10	1.10031e-08
Tmem87b	2567.41	0.958201	0.17006	5.63448	1.75589e-08	1.89949e-07
Tnfrsf26	1519.75	0.955898	0.137939	6.92986	4.21247e-12	7.51698e-11
Zfyve16	1554.63	0.955784	0.166326	5.74644	9.11402e-09	1.03179e-07
Cttnbp2nl	12488.5	0.955703	0.13128	7.27987	3.34144e-13	6.86914e-12
Gm11545	451.279	0.955018	0.227928	4.18999	2.78963e-05	0.000167241
Inppl1	12390.7	0.951999	0.156463	6.08448	1.16867e-09	1.52768e-08
Fzd7	1036.64	0.951211	0.180157	5.27991	1.29249e-07	1.2366e-06
Pikfyve	3926.86	0.949515	0.154062	6.1632	7.12905e-10	9.6831e-09
Itpkc	536.727	0.949295	0.178343	5.32287	1.02146e-07	9.95285e-07
Ppm1k	1001.3	0.948155	0.251749	3.76628	0.000165699	0.00081708
Mllt11	2748.28	0.947721	0.182368	5.19676	2.02796e-07	1.86972e-06
Kif13b	791.35	0.944507	0.171875	5.49532	3.90012e-08	4.05266e-07
Gab2	3154.87	0.944008	0.134112	7.03895	1.93695e-12	3.66036e-11
Igf2bp2	1278.07	0.943084	0.210951	4.47063	7.79908e-06	5.30843e-05
Secisbp2l	5049.52	0.943005	0.133825	7.04653	1.83433e-12	3.48266e-11
Sgsm2	967.944	0.942633	0.157275	5.99354	2.05317e-09	2.56541e-08
Calcoco1	1514.45	0.941897	0.189046	4.98236	6.28145e-07	5.25758e-06
Zfyve27	1704.51	0.941282	0.137577	6.84185	7.81777e-12	1.33815e-10
Gramd4	2485.46	0.941142	0.137855	6.82706	8.66718e-12	1.47318e-10
1700030J22Rik	76.3942	0.940271	0.394457	2.38371	0.017139	0.0447859
Suco	2240.08	0.939998	0.130457	7.20545	5.78534e-13	1.15233e-11
Sh3bp5l	2390.55	0.939078	0.141022	6.6591	2.75515e-11	4.40606e-10
Avl9	2636.69	0.939057	0.138785	6.76626	1.32157e-11	2.1972e-10
Lmtk2	1402.76	0.938818	0.179526	5.22941	1.70051e-07	1.5895e-06
Ceacam19	311.454	0.938773	0.238216	3.94084	8.11969e-05	0.000435124
Dcun1d4	314.942	0.93829	0.239117	3.92398	8.70974e-05	0.000463276
Cldn11	17365.1	0.938216	0.165474	5.66987	1.42909e-08	1.58109e-07
Prickle3	331.394	0.937885	0.212011	4.42376	9.69995e-06	6.46841e-05
Lysmd1	118.077	0.935666	0.325241	2.87684	0.00401683	0.0131199
Clec4d	12289.4	0.935229	0.118696	7.87923	3.29408e-15	8.67727e-14
Chrm4	313.919	0.934955	0.259401	3.60429	0.000313012	0.00143101
Itgav	3881.17	0.934817	0.153968	6.07152	1.26709e-09	1.64222e-08
Dlgap4	2111.94	0.933953	0.156247	5.97743	2.26688e-09	2.80365e-08
Cers4	168.831	0.933477	0.273642	3.41131	0.000646522	0.00272425
Rest	1364.28	0.932789	0.152359	6.1223	9.22363e-10	1.22814e-08
Bcl9l	477.455	0.932068	0.193468	4.81769	1.45227e-06	1.14248e-05
Pcsk7	2420.87	0.930673	0.132733	7.01164	2.35534e-12	4.38967e-11
Tpm1	6185.82	0.928788	0.128507	7.22755	4.91802e-13	9.89295e-12
Pnrc1	5517.9	0.928297	0.175856	5.27874	1.30075e-07	1.24255e-06
Gabarapl1	4740.37	0.92828	0.120518	7.70241	1.33519e-14	3.25604e-13
Ubash3b	2435.69	0.927105	0.158149	5.86223	4.56703e-09	5.37012e-08
Pde4d	875.214	0.926676	0.157079	5.89941	3.64801e-09	4.38266e-08
Cep170b	1219.11	0.925767	0.146354	6.32552	2.52379e-10	3.60499e-09
Zfand5	5892.91	0.925435	0.123504	7.49317	6.72287e-14	1.49302e-12
Cacna1b	428.213	0.924793	0.214919	4.30298	1.68519e-05	0.000106484
Rel	1243.18	0.922874	0.163981	5.62793	1.82387e-08	1.9643e-07
Ptpn23	3868.38	0.922462	0.15621	5.90528	3.52051e-09	4.24205e-08
Rarg	946.876	0.921433	0.223709	4.1189	3.80691e-05	0.000220095
Blzf1	2117.46	0.920541	0.158083	5.82314	5.7751e-09	6.71279e-08
Tmbim1	4601.67	0.920488	0.141473	6.50644	7.69532e-11	1.17212e-09
Prr13	2822.18	0.920183	0.179192	5.13518	2.8187e-07	2.52047e-06
Rbfox1	406.191	0.919283	0.238211	3.85911	0.000113799	0.000586835
Cdk17	2876.39	0.918512	0.145476	6.31383	2.72205e-10	3.86551e-09
Ppm1l	529.669	0.917574	0.180973	5.07022	3.97366e-07	3.46414e-06
Stx3	3369.38	0.917419	0.151309	6.06321	1.33427e-09	1.72014e-08
Iqgap1	48773.9	0.917057	0.136454	6.72064	1.80929e-11	2.97154e-10
Id2	666.189	0.916298	0.193016	4.74726	2.06191e-06	1.57128e-05
Vegfa	2801.02	0.916127	0.159044	5.76019	8.40177e-09	9.5829e-08
Pea15a	5802.91	0.915341	0.13781	6.64203	3.09396e-11	4.91559e-10
Tmeff1	395.224	0.915234	0.220577	4.14928	3.33525e-05	0.000195615
Trpm4	499.969	0.914763	0.190526	4.80126	1.57672e-06	1.2306e-05
Cox17	2062.86	0.913195	0.133031	6.86454	6.67081e-12	1.15977e-10
Braf	2107.76	0.912036	0.148655	6.13524	8.50284e-10	1.13839e-08
Aifm2	1687	0.911536	0.136801	6.66325	2.67835e-11	4.3002e-10
Arrdc4	416.858	0.911095	0.228102	3.99424	6.49018e-05	0.000355791
Bcl2l11	1616.65	0.910989	0.1522	5.98548	2.15755e-09	2.68297e-08
Unc119	1827.87	0.909322	0.163989	5.54502	2.93917e-08	3.09963e-07
Errfi1	674.038	0.908722	0.167718	5.41815	6.02174e-08	6.0416e-07
Cd14	82761.3	0.907764	0.122236	7.42634	1.11645e-13	2.44375e-12
Icam1	5788.15	0.904373	0.152105	5.94571	2.75261e-09	3.37695e-08
Mr1	436.064	0.903965	0.325726	2.77523	0.00551629	0.0172136
Gpsm1	457.281	0.902988	0.20486	4.40783	1.04412e-05	6.921e-05
St6galnac4	2111.3	0.90185	0.141494	6.37376	1.84451e-10	2.68513e-09
Ifitm2	11872.1	0.900543	0.148355	6.07021	1.27744e-09	1.65387e-08
Fgd3	6577.11	0.900366	0.128585	7.00208	2.52182e-12	4.67843e-11
Polk	1317.56	0.899308	0.1451	6.19786	5.72348e-10	7.82637e-09
Pik3cb	4342.44	0.899122	0.144145	6.23761	4.44317e-10	6.20859e-09
Rarb	940.371	0.898356	0.173047	5.19141	2.0871e-07	1.91629e-06
Golga2	3477.43	0.898312	0.128968	6.9654	3.27463e-12	5.9304e-11
Amn1	263.893	0.897967	0.229802	3.90757	9.32308e-05	0.000492456
L3mbtl3	175.71	0.897681	0.31145	2.88226	0.00394832	0.0129308
Cebpb	12785	0.896347	0.112542	7.96453	1.65855e-15	4.50547e-14
Carhsp1	3097.15	0.89594	0.124043	7.22284	5.09134e-13	1.0209e-11
Ubxn7	2692.43	0.895527	0.12591	7.11246	1.13992e-12	2.19507e-11
Ccdc186	856.298	0.893743	0.1668	5.35815	8.40762e-08	8.29179e-07
Rasal2	1484.53	0.893047	0.194365	4.59469	4.33384e-06	3.09161e-05
Lppr2	198.072	0.89148	0.318989	2.7947	0.00519473	0.0163486
Hs3st3b1	571.336	0.890367	0.202041	4.40685	1.04883e-05	6.94841e-05
Lonrf1	813.078	0.890237	0.157511	5.65189	1.58689e-08	1.73206e-07
Nfil3	1319.27	0.890031	0.147525	6.03308	1.60867e-09	2.05215e-08
Hipk1	18613.4	0.889972	0.174898	5.08853	3.60851e-07	3.18459e-06
Ypel5	1384.39	0.889592	0.145741	6.10394	1.03486e-09	1.36154e-08
Bmpr2	3012.4	0.889466	0.157164	5.65947	1.51842e-08	1.66179e-07
Hoxb4	413.447	0.888949	0.200936	4.42403	9.68752e-06	6.46366e-05
Sik1	157.359	0.888601	0.286061	3.10634	0.00189421	0.00682633
Ss18l1	359.749	0.886227	0.245742	3.60633	0.000310557	0.00142032
Zfp719	764.539	0.885967	0.160806	5.50955	3.59761e-08	3.75496e-07
Neu1	5611.74	0.885478	0.139112	6.3652	1.95035e-10	2.83242e-09
Zdhhc18	2110.71	0.885028	0.136797	6.46964	9.82361e-11	1.47233e-09
Klhl28	653.456	0.88496	0.207706	4.26065	2.03837e-05	0.00012715
Kctd6	170.09	0.884573	0.282779	3.12814	0.00175914	0.00640405
Lats2	1727.17	0.882587	0.15786	5.59094	2.25844e-08	2.41099e-07
Trim36	370.487	0.881126	0.215291	4.09272	4.26347e-05	0.000243141
Rassf8	699.593	0.880393	0.207125	4.25054	2.1326e-05	0.000132282
Trio	2843.46	0.879892	0.160955	5.4667	4.58504e-08	4.69696e-07
Clcn3	7155.65	0.879434	0.129604	6.78553	1.15661e-11	1.93729e-10
Fads2	8255.42	0.879341	0.128142	6.86221	6.7802e-12	1.1771e-10
Pim3	2435.98	0.879302	0.131306	6.69658	2.13361e-11	3.46676e-10
Trappc4	2701.13	0.879056	0.126704	6.93789	3.98001e-12	7.11258e-11
Tacc2	1369.45	0.878008	0.200202	4.3856	1.15664e-05	7.6006e-05
Dyrk2	803.584	0.877129	0.159141	5.51166	3.55459e-08	3.71325e-07
Hagh	2056.11	0.876146	0.131949	6.64003	3.13629e-11	4.97635e-10
Fbxo44	229.068	0.876129	0.244581	3.58217	0.000340758	0.00154165
Pxdn	1747.56	0.874342	0.156458	5.58836	2.29219e-08	2.44487e-07
A230028O05Rik	320.1	0.874204	0.226087	3.86668	0.000110328	0.000572772
Slc6a8	2626.65	0.874127	0.170507	5.12665	2.94949e-07	2.62969e-06
Ppp2r3a	565.514	0.873553	0.191973	4.5504	5.35428e-06	3.74923e-05
Ext1	954.162	0.873091	0.163541	5.33867	9.36288e-08	9.16704e-07
Slc39a2	114.961	0.872593	0.35706	2.44383	0.0145323	0.0390242
Ubr4	7136.88	0.872072	0.167168	5.21673	1.82111e-07	1.69441e-06
Ormdl3	1069.61	0.871199	0.147133	5.92116	3.19682e-09	3.88664e-08
Fam129b	18984.6	0.870286	0.158789	5.48077	4.23479e-08	4.37499e-07
Creb3	2458.46	0.870129	0.151311	5.7506	8.89287e-09	1.00795e-07
Camsap2	2709.64	0.868847	0.131233	6.62067	3.57571e-11	5.63685e-10
Ubn2	2635.57	0.868278	0.181374	4.78723	1.69099e-06	1.31162e-05
Stard4	2828.37	0.867678	0.171728	5.05262	4.3578e-07	3.76932e-06
Rabgef1	1899.9	0.867517	0.150327	5.77088	7.88609e-09	9.02008e-08
Cep19	486.65	0.866834	0.187662	4.61912	3.85365e-06	2.78002e-05
Zbtb21	2083.92	0.866644	0.139835	6.1976	5.73316e-10	7.83081e-09
Col27a1	111.813	0.86619	0.345042	2.51039	0.0120597	0.0333635
Trim3	1544.9	0.865107	0.142318	6.0787	1.21161e-09	1.58042e-08
Tnfrsf10b	319.826	0.864864	0.233742	3.70009	0.000215526	0.00102901
Arid3b	128.206	0.864439	0.326317	2.64908	0.00807114	0.0237375
Samd8	3749.34	0.863716	0.1274	6.77954	1.20558e-11	2.01538e-10
Tnfrsf1b	6909.78	0.86325	0.189755	4.5493	5.38257e-06	3.76687e-05
Traf5	364.116	0.862405	0.242187	3.56091	0.000369567	0.00165842
Socs5	2550.47	0.861421	0.174446	4.93805	7.89081e-07	6.48859e-06
Nod2	459.599	0.861054	0.252417	3.41123	0.000646701	0.00272425
Arhgef25	260.026	0.860424	0.28225	3.04844	0.00230032	0.00805061
Fam219a	369.328	0.858372	0.237237	3.6182	0.000296656	0.00136547
Mcf2l	755.385	0.858367	0.187464	4.57885	4.67548e-06	3.31203e-05
AU022252	341.68	0.857869	0.207059	4.14312	3.42619e-05	0.000200465
Acbd3	4701.18	0.857633	0.141191	6.07427	1.24551e-09	1.6177e-08
Gse1	2513.58	0.857522	0.143741	5.96575	2.43516e-09	2.99959e-08
Mfsd9	112.103	0.857255	0.33191	2.58279	0.00980051	0.0279457
Jmy	1726.85	0.855915	0.142067	6.02475	1.69371e-09	2.14713e-08
Prkx	2783.1	0.855275	0.140756	6.0763	1.22991e-09	1.60085e-08
Sav1	4501.46	0.855	0.123551	6.92021	4.50988e-12	8.0359e-11
Zfp703	1229.37	0.853913	0.159922	5.33954	9.31804e-08	9.13401e-07
Fam199x	1213.25	0.85345	0.150555	5.66871	1.43875e-08	1.58671e-07
1600012H06Rik	1485.77	0.853416	0.15924	5.3593	8.3544e-08	8.24599e-07
Zfp189	426.012	0.849821	0.199452	4.26078	2.03712e-05	0.000127137
Inpp4a	1388.28	0.849268	0.183088	4.63858	3.50813e-06	2.55347e-05
Bcl6	4926.52	0.848334	0.138564	6.12234	9.22133e-10	1.22814e-08
Cybb	126004	0.847712	0.160585	5.27889	1.29971e-07	1.24254e-06
Alcam	21608.1	0.847284	0.136398	6.21187	5.2359e-10	7.2246e-09
Larp1b	939.97	0.845141	0.155432	5.43737	5.40742e-08	5.44771e-07
Dopey2	1145.09	0.842524	0.164274	5.12876	2.91652e-07	2.60411e-06
Wdr44	878.246	0.842228	0.162945	5.16879	2.35614e-07	2.13827e-06
Usp35	374.202	0.841864	0.287368	2.92957	0.00339432	0.011333
Clcn5	620.148	0.841035	0.194839	4.31656	1.58477e-05	0.00010103
Cd72	19315.1	0.840785	0.134827	6.236	4.48893e-10	6.25061e-09
Cdkn1b	2609.9	0.839289	0.176467	4.75607	1.97401e-06	1.51378e-05
Nrp2	39459.2	0.839122	0.121386	6.91284	4.7505e-12	8.43994e-11
Arfgef3	1150.27	0.838959	0.175234	4.78765	1.68745e-06	1.30971e-05
Fem1b	5296.58	0.838367	0.142945	5.86494	4.49293e-09	5.29322e-08
Nfkbid	1424.16	0.838225	0.169528	4.94448	7.63492e-07	6.29946e-06
Syvn1	3053.05	0.838134	0.141038	5.94261	2.80519e-09	3.42762e-08
Dos	219.138	0.837824	0.2484	3.37288	0.00074386	0.00305424
Mtf1	1525.62	0.836994	0.145525	5.75153	8.84371e-09	1.00399e-07
Srpr	9078.83	0.835013	0.131894	6.33094	2.43675e-10	3.48886e-09
Il15	267.322	0.834917	0.24047	3.47202	0.000516561	0.00223482
Sik2	1192.05	0.832857	0.17109	4.86794	1.12765e-06	9.02863e-06
Kmt2a	2778.45	0.832611	0.198473	4.19509	2.72764e-05	0.000163847
Spen	5113.89	0.832209	0.149045	5.5836	2.35595e-08	2.50628e-07
Camk2n2	214.54	0.832191	0.255794	3.25337	0.00114046	0.0044315
Hexim1	3428.06	0.832177	0.125768	6.61677	3.67126e-11	5.77252e-10
Mtm1	1091.81	0.831812	0.152893	5.44049	5.3133e-08	5.35733e-07
Txnrd1	18024.6	0.831728	0.151775	5.48	4.2532e-08	4.39028e-07
Ccrn4l	873.004	0.831383	0.174905	4.75335	2.0007e-06	1.53039e-05
Cdkn1a	12701.9	0.831314	0.122821	6.76852	1.30109e-11	2.1661e-10
Tex264	2093.04	0.831259	0.141144	5.88945	3.87487e-09	4.6007e-08
Unkl	333.025	0.830841	0.207806	3.99816	6.3836e-05	0.000350421
Zfp369	377.881	0.830041	0.21658	3.83249	0.000126852	0.000645399
Tmem140	156.525	0.828383	0.332603	2.4906	0.0127526	0.0349784
Slc37a3	2098.01	0.828062	0.160933	5.14538	2.66982e-07	2.40145e-06
Pou2f2	844.022	0.82771	0.179928	4.60024	4.21997e-06	3.01922e-05
Ninj1	7360.29	0.827357	0.124399	6.65085	2.91414e-11	4.63595e-10
Gm8801	111.646	0.826077	0.325503	2.53785	0.0111537	0.0311904
AI607873	4540.76	0.825403	0.145787	5.66169	1.4989e-08	1.64487e-07
Crem	557.941	0.825139	0.200257	4.1204	3.7822e-05	0.000219187
Stxbp1	6602.07	0.823411	0.128373	6.4142	1.41566e-10	2.08074e-09
Wdr47	1234.37	0.822446	0.152759	5.38395	7.28683e-08	7.25108e-07
Cyth1	967.917	0.821368	0.155835	5.27077	1.35853e-07	1.2947e-06
Ccng2	1920.45	0.82081	0.200389	4.09608	4.20206e-05	0.000239864
Rnasek	3499.33	0.818496	0.136287	6.00567	1.90543e-09	2.38816e-08
Hotairm1	186.448	0.81788	0.266955	3.06373	0.00218594	0.00771321
Ago3	529.271	0.817442	0.240366	3.40082	0.000671849	0.00280403
Gale	947.031	0.817294	0.16149	5.06097	4.17135e-07	3.62092e-06
Tspan17	400.97	0.816758	0.212822	3.83775	0.000124168	0.000634658
Zfp292	2414.39	0.815926	0.143498	5.68599	1.30055e-08	1.4415e-07
Golga4	5410.21	0.814683	0.13829	5.89112	3.83585e-09	4.56774e-08
Ttbk2	1132.19	0.814404	0.168532	4.83233	1.34943e-06	1.0664e-05
Asap3	154.53	0.814096	0.292376	2.78441	0.00536245	0.0168199
Prkcg	318.602	0.812189	0.218576	3.71582	0.000202549	0.000976632
Wipf2	1659.06	0.811423	0.149371	5.43226	5.56447e-08	5.60129e-07
Ik	23955.2	0.811023	0.111618	7.26605	3.70138e-13	7.57072e-12
Anxa5	62859.9	0.810766	0.130263	6.22409	4.84368e-10	6.70621e-09
Etv1	4573.52	0.809785	0.144138	5.61811	1.93053e-08	2.07183e-07
Atp8b2	5509.43	0.809357	0.120211	6.73278	1.66447e-11	2.75225e-10
Sec16a	4660.68	0.808078	0.1461	5.53099	3.18426e-08	3.34073e-07
Chd7	2173.3	0.808065	0.166706	4.84725	1.25188e-06	9.96425e-06
Pik3c2a	6351.41	0.807665	0.153893	5.24823	1.53565e-07	1.4465e-06
Rictor	2221.5	0.807185	0.151173	5.33947	9.32165e-08	9.13401e-07
Igip	440.974	0.807099	0.242604	3.32682	0.000878424	0.00354222
Tgif2	396.973	0.806911	0.207938	3.88054	0.000104224	0.000543447
Mxd1	506.869	0.806811	0.212576	3.7954	0.000147405	0.000736723
Ctif	723.799	0.805367	0.170946	4.71125	2.46207e-06	1.8439e-05
Arid4b	1984.58	0.805219	0.156573	5.14277	2.7072e-07	2.43148e-06
Dok2	5182.44	0.805038	0.135977	5.92042	3.21122e-09	3.90026e-08
Fam114a1	434.511	0.804696	0.189507	4.24626	2.17369e-05	0.000134556
Tanc1	3016.97	0.804683	0.132237	6.08516	1.16376e-09	1.52289e-08
Emp1	19122	0.80356	0.150457	5.34079	9.25412e-08	9.08247e-07
Aldh1l1	101.407	0.8025	0.338751	2.369	0.0178362	0.0462238
Lpcat2	3510.46	0.802392	0.149857	5.35439	8.58465e-08	8.45953e-07
Cd300lb	14226.4	0.802254	0.132631	6.04876	1.45963e-09	1.87381e-08
Fam134b	5336.54	0.801971	0.120819	6.63781	3.18383e-11	5.04521e-10
Dlg4	960.478	0.801312	0.150875	5.31111	1.08961e-07	1.05831e-06
Pank3	9621.52	0.800595	0.13733	5.82973	5.55185e-09	6.47185e-08
Tfe3	7537.07	0.800551	0.123177	6.49921	8.07454e-11	1.22375e-09
Gnaq	8556.87	0.799857	0.126986	6.29879	2.99983e-10	4.24511e-09
Il10ra	2680.02	0.799207	0.196053	4.07648	4.57228e-05	0.000259174
Arfgap3	1259.6	0.797627	0.163161	4.8886	1.01556e-06	8.19584e-06
Sccpdh	294.942	0.796458	0.254556	3.12881	0.00175516	0.00639573
Tsc22d2	1843.98	0.796151	0.167028	4.76658	1.87382e-06	1.44331e-05
Kbtbd11	13650.6	0.796015	0.184898	4.30516	1.66865e-05	0.000105768
Map3k2	3059.44	0.795154	0.145025	5.48288	4.18461e-08	4.33419e-07
Slc2a6	9199.2	0.794668	0.17455	4.55267	5.29694e-06	3.71121e-05
Tnip3	7503.1	0.794644	0.118141	6.72625	1.74086e-11	2.863e-10
Usp32	2653.01	0.793711	0.151608	5.23527	1.64744e-07	1.54226e-06
Atxn2	2593.53	0.793105	0.147854	5.36412	8.13445e-08	8.03541e-07
Spsb2	921.144	0.792978	0.172944	4.58516	4.53636e-06	3.22098e-05
Antxr2	3919.87	0.792554	0.121586	6.51844	7.1041e-11	1.08751e-09
4930455G09Rik	249.194	0.792509	0.298157	2.65802	0.00786002	0.0231838
Dnajb9	1519.14	0.792473	0.148965	5.31986	1.03845e-07	1.01103e-06
Nf1	2352.88	0.791347	0.140096	5.64859	1.61767e-08	1.76407e-07
Nbr1	6299.74	0.791345	0.127947	6.18494	6.21275e-10	8.47636e-09
Blcap	1777.67	0.790401	0.148919	5.3076	1.1108e-07	1.0746e-06
Mpv17l	346.07	0.790024	0.210003	3.76197	0.000168582	0.00083029
Hyou1	15862.9	0.788531	0.126652	6.22597	4.78595e-10	6.63383e-09
Nab2	5045.5	0.78845	0.125788	6.26808	3.65533e-10	5.15473e-09
Zfand3	3778.67	0.787842	0.120843	6.51955	7.05202e-11	1.08089e-09
Zbtb7a	8346.66	0.787553	0.128234	6.14154	8.17233e-10	1.09897e-08
Dot1l	5156.95	0.787462	0.200128	3.93478	8.32718e-05	0.000445459
St3gal3	1403.31	0.787248	0.159562	4.93381	8.06419e-07	6.62221e-06
Mpp5	1990.82	0.78699	0.146694	5.36483	8.1027e-08	8.02358e-07
Zscan2	158.163	0.786863	0.28493	2.7616	0.0057519	0.0178164
Gripap1	10636.7	0.786653	0.116943	6.7268	1.73439e-11	2.85622e-10
Sik3	2766.13	0.786348	0.13228	5.94456	2.77207e-09	3.39739e-08
Arap3	6971.45	0.78631	0.162431	4.84088	1.29265e-06	1.02419e-05
Golga3	3274.38	0.785679	0.140887	5.57666	2.45176e-08	2.60593e-07
Bag3	2645.67	0.785601	0.146843	5.34995	8.79809e-08	8.65584e-07
Usp12	2148.55	0.78558	0.135152	5.81256	6.15231e-09	7.13082e-08
Ccnt1	1534.04	0.785335	0.152832	5.13855	2.76867e-07	2.48293e-06
Mapre3	146.741	0.785128	0.311465	2.52076	0.0117102	0.0325223
Mob3c	749.07	0.785126	0.162006	4.84628	1.258e-06	1.00065e-05
Pde1b	1154.59	0.784712	0.195459	4.01471	5.95198e-05	0.000328209
Selk	3572.22	0.784636	0.14151	5.54473	2.94409e-08	3.10213e-07
Zfp667	202.584	0.784439	0.273123	2.87211	0.00407745	0.0132929
Cdk6	1595.75	0.783356	0.16261	4.8174	1.45442e-06	1.14343e-05
Fbxo30	1578.76	0.782643	0.17562	4.45646	8.33254e-06	5.6306e-05
Fam102b	4253.27	0.782465	0.130646	5.98919	2.10886e-09	2.62959e-08
C920009B18Rik	602.59	0.782228	0.178546	4.38111	1.18077e-05	7.73785e-05
Arhgap26	990.609	0.782157	0.15461	5.05889	4.21697e-07	3.65531e-06
Hmga2	8317.62	0.78184	0.199994	3.90932	9.25568e-05	0.000489746
Foxn3	473.858	0.781658	0.192987	4.05032	5.11479e-05	0.00028672
Fam222b	1279.77	0.780118	0.158711	4.91533	8.86311e-07	7.22465e-06
Ube2h	2913.23	0.779653	0.150761	5.17146	2.3227e-07	2.11581e-06
AI464131	140.892	0.778957	0.305401	2.5506	0.0107536	0.0301965
Napg	3673.42	0.778831	0.127652	6.10122	1.05262e-09	1.38341e-08
Fxr2	5115.96	0.777029	0.128037	6.0688	1.28867e-09	1.66487e-08
Rwdd4a	2299.76	0.776601	0.172766	4.4951	6.95366e-06	4.76767e-05
Rc3h2	2434.4	0.775656	0.159813	4.85352	1.21292e-06	9.68582e-06
Slc35a2	1381.11	0.77495	0.148617	5.21442	1.84392e-07	1.71301e-06
Slco4a1	44609.2	0.774619	0.154491	5.01402	5.33056e-07	4.53023e-06
Ttc39b	3506.32	0.774249	0.134034	5.77649	7.62744e-09	8.74892e-08
Tln1	43632.4	0.772471	0.143762	5.37327	7.73221e-08	7.66919e-07
Il12rb1	333.362	0.771417	0.229635	3.35931	0.000781368	0.00318568
Acly	18855.2	0.771268	0.159808	4.82622	1.39148e-06	1.09821e-05
Lcorl	2080.62	0.771148	0.137092	5.62505	1.85458e-08	1.99384e-07
Aph1c	1364.19	0.770694	0.222972	3.45646	0.000547327	0.00235038
1810013L24Rik	2909.25	0.770384	0.133484	5.77137	7.86292e-09	9.00205e-08
Stard10	294.958	0.768836	0.220537	3.48621	0.00048992	0.00213245
Pgpep1	1095.18	0.767829	0.205862	3.72982	0.000191618	0.000930563
Rnf11	3611.02	0.766091	0.126154	6.07268	1.25794e-09	1.63211e-08
Ripk2	1536.69	0.76579	0.145545	5.26152	1.4287e-07	1.34889e-06
Fam63b	4381.04	0.765727	0.196563	3.89557	9.7968e-05	0.000514353
Clcn6	760.312	0.765095	0.171633	4.45773	8.28302e-06	5.60647e-05
Lyst	4438.21	0.764594	0.193271	3.95608	7.61912e-05	0.000411378
Tmem198b	415.176	0.763766	0.211923	3.60398	0.000313382	0.00143217
Cpd	7762.69	0.763561	0.134234	5.68829	1.28314e-08	1.42351e-07
Cbl	2840.49	0.762904	0.155582	4.90356	9.41134e-07	7.63064e-06
Zfp810	477.225	0.761345	0.189528	4.01706	5.89283e-05	0.000325537
Gdi1	3462.05	0.761291	0.133538	5.70094	1.19146e-08	1.32784e-07
Sgms1	3574.29	0.761154	0.132237	5.75597	8.61459e-09	9.78895e-08
Stap2	239.933	0.760351	0.253816	2.99568	0.00273832	0.00938172
Pik3ca	4887.31	0.75937	0.133951	5.669	1.43635e-08	1.58671e-07
Pdp2	1299.95	0.759327	0.165141	4.59806	4.26445e-06	3.04926e-05
Akr1b8	3482.7	0.758218	0.151184	5.01518	5.29834e-07	4.50599e-06
Chd1	5510.83	0.758014	0.13455	5.63369	1.76398e-08	1.90654e-07
Zbtb7b	4573.12	0.75791	0.129342	5.85974	4.63593e-09	5.44588e-08
Trip11	1514.09	0.75763	0.17593	4.30642	1.65916e-05	0.000105331
Gatsl3	232.227	0.757138	0.270384	2.80023	0.00510663	0.0161171
Supt3	1432.08	0.756852	0.138082	5.48116	4.22537e-08	4.36897e-07
Hic2	253.664	0.755692	0.237656	3.17978	0.00147389	0.0055039
2210018M11Rik	1437.01	0.755393	0.152853	4.94196	7.73424e-07	6.37708e-06
Slfn5	1753.88	0.754734	0.14918	5.05921	4.20997e-07	3.65185e-06
Nat6	953.636	0.754141	0.153764	4.90452	9.36549e-07	7.59853e-06
Hook3	5967.16	0.753951	0.142405	5.29443	1.19389e-07	1.15132e-06
Csf2rb2	979.047	0.752962	0.164508	4.57705	4.71572e-06	3.33665e-05
Hcls1	15049.5	0.752694	0.114138	6.59462	4.26345e-11	6.65207e-10
Bcl9	1852.62	0.75256	0.138192	5.44577	5.1581e-08	5.21813e-07
Riok3	5203.06	0.752111	0.125086	6.01275	1.82399e-09	2.29793e-08
Utrn	1054.83	0.752061	0.172193	4.36754	1.25654e-05	8.17756e-05
Usp22	3517.27	0.751761	0.123142	6.10485	1.02894e-09	1.35669e-08
Zfp260	1964.87	0.751301	0.161988	4.638	3.51798e-06	2.55911e-05
Sesn1	3889.13	0.751087	0.195969	3.83269	0.000126751	0.000645153
Fam214a	306.855	0.750935	0.246767	3.04309	0.00234159	0.00817473
2310022B05Rik	484.257	0.750395	0.183034	4.09976	4.13578e-05	0.000236925
Blvrb	1518.4	0.75028	0.1551	4.83741	1.31541e-06	1.04154e-05
Micu3	432.557	0.749599	0.204058	3.67346	0.000239291	0.00112875
Map3k9	558.736	0.749438	0.179549	4.174	2.99301e-05	0.00017803
Slc9a3r1	1610.76	0.749171	0.149753	5.00273	5.65252e-07	4.77716e-06
Lrrc41	6015.42	0.749171	0.132666	5.64706	1.63218e-08	1.77512e-07
Swt1	1017.23	0.7488	0.163283	4.58591	4.52016e-06	3.21135e-05
Suox	473.142	0.748578	0.203013	3.68734	0.000226612	0.00107561
Atg2b	2861.98	0.747844	0.137219	5.44999	5.03714e-08	5.10849e-07
Alas1	1683.5	0.747623	0.156994	4.76211	1.91575e-06	1.47188e-05
Pfkp	12133.7	0.747013	0.16092	4.64214	3.44825e-06	2.51138e-05
Pde4b	1447.39	0.746128	0.215874	3.45632	0.000547609	0.00235076
Mier3	721.301	0.746098	0.206627	3.61084	0.000305203	0.00139846
Pla2g6	727.128	0.74602	0.171507	4.34978	1.36272e-05	8.80268e-05
Pycr2	3208.42	0.745902	0.126192	5.91084	3.40358e-09	4.10929e-08
9930021J03Rik	1904.5	0.745547	0.144285	5.16719	2.37642e-07	2.15346e-06
Etv6	3147.61	0.745515	0.13305	5.60328	2.10339e-08	2.2494e-07
Ubap1	3048.37	0.745051	0.125994	5.91339	3.35137e-09	4.05429e-08
Abcb4	2718.74	0.744283	0.131335	5.66705	1.45274e-08	1.59998e-07
Slc35f5	1333.41	0.742986	0.14421	5.15212	2.57559e-07	2.32013e-06
Slc11a2	3827.81	0.742932	0.120523	6.16424	7.08243e-10	9.63052e-09
Lpgat1	7220.75	0.7426	0.153998	4.82215	1.42022e-06	1.11944e-05
St18	1898.49	0.742465	0.14629	5.0753	3.86879e-07	3.38972e-06
Lmbrd1	3172.7	0.742383	0.156903	4.73146	2.22908e-06	1.68496e-05
Zfp747	488.873	0.741872	0.188846	3.92846	8.54923e-05	0.000456334
Wbp2	4370.04	0.741862	0.126362	5.87093	4.33354e-09	5.11039e-08
Tmem41b	2115.74	0.741016	0.14446	5.12957	2.90401e-07	2.59484e-06
Bcl3	791.728	0.740783	0.188917	3.92122	8.81035e-05	0.000468218
B4galt3	1353.81	0.73993	0.159812	4.63001	3.65646e-06	2.65191e-05
Aak1	2497.88	0.739682	0.145337	5.08944	3.59123e-07	3.17395e-06
Chpf2	2975.65	0.739545	0.143261	5.16222	2.44037e-07	2.20649e-06
Mllt4	8447.27	0.739215	0.130998	5.64295	1.67157e-08	1.8131e-07
Fbxl20	2416.21	0.739176	0.158701	4.65766	3.19818e-06	2.34187e-05
Mt1	6646.9	0.739007	0.120037	6.15652	7.43625e-10	1.00779e-08
Mfge8	2326.9	0.738987	0.167106	4.42227	9.76676e-06	6.49872e-05
Slain2	5745.67	0.738699	0.145682	5.07064	3.96482e-07	3.46139e-06
Nt5dc3	1695.72	0.738483	0.14661	5.03706	4.72728e-07	4.06006e-06
4930402H24Rik	3982.64	0.738165	0.151034	4.8874	1.02174e-06	8.23485e-06
Ahcyl2	2944.22	0.737979	0.126253	5.84526	5.05767e-09	5.92414e-08
Pja2	3396.37	0.73763	0.135579	5.44058	5.31062e-08	5.35733e-07
Slc30a1	1832.77	0.737576	0.134842	5.46993	4.50203e-08	4.61581e-07
Micall2	573.602	0.736723	0.191621	3.84469	0.000120704	0.000618255
2210408F21Rik	496.316	0.736675	0.291776	2.5248	0.0115764	0.0322096
Rnf103	1253.77	0.736177	0.146933	5.0103	5.43442e-07	4.59923e-06
Trrap	5080.53	0.735807	0.141927	5.1844	2.1671e-07	1.98597e-06
A930015D03Rik	185.261	0.735395	0.269534	2.7284	0.00636431	0.0193885
Mier2	1746.72	0.735216	0.159695	4.60387	4.14704e-06	2.97229e-05
Nfat5	16742.9	0.73504	0.156467	4.69774	2.63052e-06	1.95921e-05
5830432E09Rik	235.526	0.734599	0.30076	2.44248	0.0145868	0.0391102
Foxj2	1988.82	0.734279	0.132176	5.55529	2.77146e-08	2.92783e-07
Ap4b1	1858.58	0.733565	0.147684	4.96713	6.79507e-07	5.64478e-06
Rabac1	4064.88	0.732672	0.13534	5.41357	6.17818e-08	6.18326e-07
Dapk3	2647.55	0.732269	0.132477	5.52751	3.24815e-08	3.40482e-07
P3h1	809.24	0.732157	0.157389	4.6519	3.28884e-06	2.40103e-05
Cmtm6	3705.38	0.73156	0.135088	5.41545	6.1136e-08	6.12366e-07
Tnip2	1263.83	0.730764	0.142531	5.12706	2.94309e-07	2.62591e-06
Dcaf10	1767.36	0.730129	0.133753	5.4588	4.79355e-08	4.88998e-07
Cd151	1747.42	0.72963	0.139895	5.21556	1.83266e-07	1.70386e-06
Slc11a1	4235.57	0.728733	0.149267	4.88208	1.04973e-06	8.43806e-06
Kmt2d	4541.1	0.727926	0.189957	3.83206	0.000127075	0.000646263
C3ar1	2358	0.727845	0.137614	5.28902	1.22975e-07	1.18215e-06
Slc4a7	6235.05	0.724076	0.124616	5.81045	6.23059e-09	7.21467e-08
Atxn7	1804.81	0.724028	0.160314	4.51631	6.29268e-06	4.35867e-05
Edem3	3500.09	0.723901	0.135291	5.3507	8.76144e-08	8.62676e-07
Mbnl2	10949.7	0.723532	0.1376	5.25822	1.45459e-07	1.37228e-06
Midn	3623.87	0.723385	0.1367	5.29177	1.2114e-07	1.16636e-06
1810055G02Rik	663.9	0.722682	0.189838	3.80683	0.000140758	0.000708449
Atp1a1	75092.7	0.722653	0.120311	6.00654	1.89528e-09	2.3779e-08
Ptger4	996.546	0.72211	0.180823	3.99346	6.51156e-05	0.000356641
Nup210l	268.096	0.721848	0.228115	3.16441	0.00155399	0.00575885
Pi4k2b	1903.1	0.721064	0.13761	5.2399	1.60666e-07	1.50709e-06
Zfp827	856.001	0.720481	0.172408	4.17893	2.92879e-05	0.000174578
Nkiras1	172.998	0.720244	0.275083	2.61828	0.00883753	0.02562
5330426P16Rik	1165.64	0.720227	0.190234	3.78602	0.000153081	0.000761964
Helz2	3164.53	0.719982	0.143654	5.0119	5.38945e-07	4.5707e-06
Camta2	3474.79	0.719845	0.121811	5.90954	3.43064e-09	4.13785e-08
Prpf40b	723.369	0.7192	0.161685	4.44815	8.66137e-06	5.83337e-05
Dbi	3991.8	0.71869	0.125848	5.71078	1.12463e-08	1.25797e-07
Mnda	198.403	0.718628	0.257943	2.78599	0.0053364	0.0167511
Arrdc3	279.588	0.718382	0.3065	2.34382	0.0190873	0.0490172
Ado	4106.55	0.718139	0.151228	4.74872	2.04703e-06	1.56093e-05
Setd7	5791.53	0.717967	0.141603	5.07028	3.9723e-07	3.46414e-06
Lst1	926.768	0.716405	0.23294	3.07549	0.00210157	0.00746673
Fxyd2	42340.5	0.715366	0.192903	3.70841	0.000208561	0.000999679
Crebrf	2807.27	0.715331	0.177001	4.0414	5.31334e-05	0.000296077
Sgk1	348.654	0.715269	0.238461	2.99953	0.00270399	0.00927757
Rasa2	1742.51	0.715155	0.142569	5.0162	5.27026e-07	4.49153e-06
Pfkfb3	1705.14	0.714547	0.165257	4.32384	1.53334e-05	9.80597e-05
Ino80d	1980.14	0.714516	0.169967	4.20384	2.62426e-05	0.00015879
B230312C02Rik	1176.64	0.714096	0.187419	3.81016	0.000138879	0.000700275
Nus1	10159.4	0.713822	0.114229	6.24902	4.13038e-10	5.79778e-09
Csad	455.614	0.713633	0.202511	3.52392	0.000425219	0.00188179
Tubb2a	826.719	0.713182	0.217183	3.28379	0.00102423	0.00404047
Npepps	5576.13	0.713156	0.128714	5.54061	3.01423e-08	3.16781e-07
Ccser2	1936.39	0.713043	0.137574	5.18297	2.18376e-07	1.99973e-06
Ube2g2	4490.3	0.712808	0.136522	5.22119	1.77777e-07	1.65535e-06
Map4k3	1615.48	0.712752	0.147127	4.84446	1.26954e-06	1.0085e-05
Fam160b1	1637.91	0.712572	0.140685	5.06503	4.08333e-07	3.55039e-06
Tom1l2	1973.58	0.712038	0.139462	5.10559	3.29771e-07	2.9209e-06
Uhrf1bp1l	3719.37	0.71161	0.137359	5.18067	2.21094e-07	2.02157e-06
Apbb2	2144.2	0.710836	0.170355	4.17266	3.01063e-05	0.000178674
Ap1s3	1676.65	0.708911	0.198806	3.56585	0.00036268	0.00163233
Ankrd12	1661.23	0.708696	0.162499	4.36123	1.29336e-05	8.40372e-05
Gm608	2011.04	0.708267	0.146002	4.85109	1.22782e-06	9.78556e-06
Rab11a	5452.89	0.707979	0.11869	5.96496	2.44696e-09	3.01107e-08
Prkab2	711.791	0.707864	0.174263	4.06205	4.86444e-05	0.000274202
Kdm4b	1309.96	0.707824	0.143854	4.92043	8.63542e-07	7.06746e-06
Insr	1616.33	0.707636	0.170995	4.13833	3.49842e-05	0.000204396
Prnp	758.746	0.707573	0.18184	3.89118	9.97593e-05	0.000522856
Hectd1	8455.07	0.706927	0.149851	4.71754	2.38711e-06	1.79107e-05
Rab33b	811.553	0.706517	0.162022	4.36062	1.29692e-05	8.41786e-05
Fktn	1277.87	0.706431	0.146126	4.8344	1.33545e-06	1.05673e-05
Uba6	4088.61	0.705981	0.130854	5.39518	6.84549e-08	6.82306e-07
Cited2	30930.8	0.705932	0.135385	5.21426	1.84556e-07	1.71323e-06
Zfhx2	561.233	0.705254	0.222914	3.1638	0.00155722	0.00576906
Inpp1	536.801	0.705235	0.182426	3.86586	0.000110696	0.000574244
Rara	999.629	0.70329	0.163318	4.30626	1.66041e-05	0.000105355
Zc3h3	806.509	0.702225	0.176322	3.98263	6.81578e-05	0.000371798
Mief1	3356.47	0.70215	0.123702	5.67614	1.3777e-08	1.52563e-07
Thra	713.831	0.701784	0.174035	4.03243	5.52036e-05	0.000307051
Slc25a25	1920.5	0.701677	0.150461	4.6635	3.10873e-06	2.28599e-05
Kdsr	1937.45	0.701055	0.14174	4.94606	7.57316e-07	6.25274e-06
Zbtb43	1351.69	0.700164	0.14942	4.68589	2.78748e-06	2.06725e-05
Kmt2c	2934.39	0.699994	0.181236	3.86235	0.000112303	0.000580354
D17H6S53E	836.176	0.699568	0.187549	3.73005	0.00019144	0.000930439
4932438A13Rik	3136.03	0.699084	0.1744	4.0085	6.11056e-05	0.00033659
Tmem74	197.745	0.698523	0.285006	2.45091	0.0142497	0.038333
Fam53c	3184.06	0.697935	0.138804	5.02822	4.95055e-07	4.23686e-06
Rb1cc1	2417.27	0.697876	0.133002	5.2471	1.54513e-07	1.45318e-06
Cdr2	985.644	0.697691	0.181977	3.83396	0.000126096	0.000642517
Fkbp1b	263.406	0.697266	0.284141	2.45394	0.0141301	0.0380533
Tank	4749.54	0.696847	0.1183	5.8905	3.8502e-09	4.57588e-08
Piezo1	9838.22	0.696809	0.132088	5.27534	1.32513e-07	1.26485e-06
Iffo2	1525.95	0.695767	0.145476	4.78268	1.72975e-06	1.33743e-05
Zbtb32	1010.86	0.695736	0.238347	2.91901	0.00351144	0.0116569
Lzts3	489.52	0.695338	0.203346	3.41949	0.00062739	0.00265762
Dip2c	2242.69	0.694374	0.165468	4.19641	2.71176e-05	0.000163377
Pdcd4	1350.32	0.694351	0.168529	4.12006	3.78778e-05	0.000219406
Zfp954	611.009	0.692964	0.19029	3.64163	0.000270922	0.00125844
Wdr37	2640.99	0.692662	0.130846	5.29372	1.19855e-07	1.15489e-06
Nck1	2045.53	0.692256	0.183168	3.77936	0.000157234	0.000779762
Prune	2013.65	0.691955	0.13781	5.02109	5.13797e-07	4.388e-06
Gpr85	219.593	0.691579	0.290217	2.38297	0.0171734	0.0448499
Evl	2118.95	0.691366	0.142735	4.84369	1.27451e-06	1.01179e-05
Dnmbp	964.706	0.691309	0.167444	4.12859	3.64987e-05	0.000212531
Phtf2	1866.56	0.691068	0.135213	5.11098	3.20499e-07	2.84498e-06
Adam8	22781	0.690705	0.152129	4.54025	5.61864e-06	3.91856e-05
Far1	6596.35	0.69055	0.138795	4.97533	6.51365e-07	5.43325e-06
Prrc2c	12955	0.68994	0.165319	4.17339	3.00095e-05	0.000178328
Ralgapa1	3493.83	0.689717	0.131083	5.26167	1.42753e-07	1.34884e-06
Atg9a	2944.85	0.68955	0.124101	5.55637	2.75447e-08	2.91242e-07
Syt11	785.207	0.689331	0.15934	4.32617	1.51725e-05	9.71329e-05
Tbc1d12	586.862	0.689308	0.186305	3.6999	0.000215688	0.00102938
Med13	4947.96	0.68733	0.155571	4.41811	9.95661e-06	6.61058e-05
Adcy9	931.974	0.686468	0.161325	4.25518	2.08884e-05	0.000129965
Klf8	462.372	0.685942	0.20406	3.36148	0.000775268	0.00316717
March7	3644.22	0.685619	0.134008	5.11627	3.11644e-07	2.77448e-06
Sde2	3483.35	0.685129	0.129637	5.28496	1.2573e-07	1.20673e-06
Kif7	239.434	0.684381	0.267458	2.55883	0.0105024	0.0296346
Itprip	902.645	0.684237	0.170181	4.02065	5.8038e-05	0.000321348
Taok1	5098.12	0.684148	0.155532	4.39875	1.08876e-05	7.18556e-05
Megf9	724.808	0.684019	0.167743	4.07779	4.54664e-05	0.000257841
Lrrfip2	2997.04	0.683939	0.130854	5.22672	1.72547e-07	1.61035e-06
Ankrd50	588.09	0.683636	0.175058	3.90521	9.41455e-05	0.000496426
Bdp1	3313.31	0.683428	0.159258	4.29134	1.776e-05	0.000111815
Abi2	2728.44	0.683338	0.133019	5.13714	2.78953e-07	2.49621e-06
Atp6v1h	5521.63	0.682897	0.134522	5.07647	3.84516e-07	3.37339e-06
Lnpep	3571.46	0.682413	0.140917	4.84268	1.28102e-06	1.01564e-05
Lix1l	5224.79	0.681471	0.147944	4.60626	4.09974e-06	2.94186e-05
Fbrs	3715.29	0.681294	0.138405	4.92248	8.54547e-07	6.99854e-06
Pitpnc1	842.124	0.681106	0.161454	4.21856	2.45865e-05	0.000150209
Kmt2e	5034.69	0.680494	0.13632	4.99191	5.97859e-07	5.03525e-06
Fbxo33	1897.33	0.68036	0.137471	4.9491	7.45569e-07	6.1725e-06
Dync2h1	891.055	0.679834	0.162918	4.17286	3.008e-05	0.00017866
Mlxip	3682.18	0.679231	0.134851	5.03691	4.73102e-07	4.06041e-06
Mfsd6	3609.7	0.678132	0.12642	5.36413	8.13421e-08	8.03541e-07
Dmxl2	1561.95	0.677685	0.173977	3.89525	9.80971e-05	0.000514809
Mecp2	2804.94	0.675591	0.124924	5.408	6.37311e-08	6.36788e-07
Rnf214	1500.81	0.675234	0.149706	4.51041	6.47027e-06	4.46643e-05
Bcl2l2	1877.74	0.675157	0.136065	4.962	6.97696e-07	5.78798e-06
Unc119b	2094.77	0.675006	0.145587	4.63644	3.54454e-06	2.57688e-05
Slc17a9	470.806	0.674475	0.198808	3.39259	0.000692359	0.00287577
Sh3kbp1	2800.42	0.673758	0.156372	4.30868	1.64235e-05	0.000104373
Nbeal1	1480.53	0.673643	0.1978	3.40568	0.000659995	0.00276684
Lemd3	1420.57	0.673574	0.152187	4.42597	9.60096e-06	6.40942e-05
Zdhhc8	1038	0.672976	0.175484	3.83496	0.000125583	0.000640278
Tbc1d17	1979.36	0.672765	0.150575	4.46797	7.89652e-06	5.37175e-05
Tbcel	2075.47	0.672632	0.129656	5.18782	2.12767e-07	1.9513e-06
Gatad2b	2353.86	0.671813	0.156189	4.30128	1.69817e-05	0.000107137
Sdf2l1	4149.15	0.671425	0.128134	5.24002	1.60561e-07	1.50709e-06
Llgl2	246.334	0.67098	0.262934	2.55189	0.0107139	0.0301129
Trim13	297.928	0.670754	0.217528	3.08353	0.00204562	0.00729849
Dclre1b	3571.23	0.670487	0.157492	4.25726	2.06943e-05	0.000128955
Rnf19a	1348.87	0.670145	0.143426	4.67241	2.9769e-06	2.19569e-05
Gskip	1322.66	0.67005	0.167735	3.99469	6.47785e-05	0.000355274
Sgsm1	783.5	0.669461	0.171798	3.89679	9.74763e-05	0.000512213
Kat6b	592.835	0.669438	0.200518	3.33854	0.000842196	0.00340855
Apc	2624.57	0.668257	0.158977	4.20347	2.62849e-05	0.000158911
Tnfaip8l2	3493.73	0.667982	0.16036	4.16552	3.10641e-05	0.000183876
Ulk1	1379.53	0.667224	0.140768	4.73989	2.13831e-06	1.62138e-05
S100pbp	786.8	0.667195	0.173872	3.83727	0.000124409	0.000635089
Atn1	3526.66	0.66689	0.143059	4.66163	3.13715e-06	2.3055e-05
Rassf5	3326.45	0.666799	0.131475	5.07169	3.943e-07	3.44481e-06
Ep300	5328.88	0.666699	0.150101	4.44167	8.92642e-06	5.99528e-05
Zbtb42	750.576	0.666548	0.208886	3.19097	0.00141798	0.00532124
Rab11fip3	1379.8	0.666454	0.141093	4.72351	2.31812e-06	1.74576e-05
Ltb	834.797	0.666451	0.220513	3.02228	0.00250882	0.00867365
Samsn1	1002.15	0.666099	0.160002	4.16307	3.14002e-05	0.000185595
Ralgapa2	1045.18	0.665699	0.17416	3.82235	0.000132186	0.000669177
Tmco3	1693.07	0.664879	0.149325	4.45255	8.48568e-06	5.7186e-05
Nktr	4720.4	0.664854	0.166012	4.00487	6.20524e-05	0.000341246
Fchsd1	513.778	0.664698	0.199766	3.32738	0.000876664	0.0035363
Usp20	1530.27	0.664206	0.143394	4.63204	3.62084e-06	2.62922e-05
Ktn1	2398.34	0.663687	0.152537	4.35099	1.35522e-05	8.76825e-05
Slc25a1	3731.91	0.663	0.152204	4.356	1.32463e-05	8.58858e-05
Ccdc112	338.495	0.66252	0.222073	2.98334	0.00285119	0.00972504
Ptrh1	525.858	0.662272	0.205137	3.22845	0.00124465	0.00476931
Cebpd	2499.72	0.662131	0.153864	4.30336	1.68225e-05	0.000106444
Opn3	177.799	0.661349	0.276247	2.39405	0.0166634	0.0436867
Ost4	2928.08	0.66118	0.140576	4.70338	2.55896e-06	1.90941e-05
Extl3	4485.52	0.661099	0.134173	4.9272	8.34177e-07	6.83632e-06
Cep170	5783.02	0.65961	0.137938	4.78193	1.73622e-06	1.34158e-05
Ranbp10	3807.64	0.659536	0.127741	5.16309	2.42912e-07	2.1988e-06
AI846148	498.137	0.658935	0.183016	3.60042	0.000317705	0.00144859
Scarf1	1128.61	0.658754	0.183367	3.59254	0.000327476	0.00148764
Hinfp	1004.64	0.657017	0.157135	4.18124	2.89928e-05	0.000173189
Hivep2	1395.97	0.656421	0.162326	4.04385	5.25805e-05	0.000293534
Fndc3a	3272.71	0.656139	0.137983	4.75523	1.9822e-06	1.51815e-05
Lzts2	1871.34	0.655904	0.15089	4.34691	1.38069e-05	8.90454e-05
Gas2l3	6759.55	0.655476	0.129944	5.04432	4.5514e-07	3.9173e-06
Rala	3195.3	0.654867	0.123354	5.30883	1.10329e-07	1.06903e-06
Svil	828.562	0.654787	0.186107	3.51834	0.000434258	0.00191344
Insig2	1516.19	0.654593	0.138038	4.74213	2.11483e-06	1.60458e-05
Dmxl1	4382.9	0.654216	0.146036	4.47983	7.47016e-06	5.10168e-05
Runx1	5262.88	0.654101	0.126513	5.17021	2.33825e-07	2.12839e-06
Arhgef12	1379.39	0.652762	0.157912	4.1337	3.56964e-05	0.000208258
Ubr5	8101.07	0.65217	0.146247	4.45938	8.21952e-06	5.57279e-05
Tob2	4767.28	0.651536	0.146279	4.45407	8.42571e-06	5.68723e-05
Myo9a	2120.02	0.651474	0.140189	4.64711	3.36622e-06	2.45458e-05
Herc4	5591.59	0.649781	0.118071	5.50332	3.72709e-08	3.88345e-07
Simc1	548.992	0.649165	0.181034	3.58587	0.000335954	0.00152161
Slc41a2	2180.29	0.648906	0.145617	4.45624	8.34114e-06	5.63328e-05
Rraga	3738	0.647961	0.128628	5.03748	4.71703e-07	4.05411e-06
Ccdc93	2900.11	0.647672	0.153489	4.21968	2.44652e-05	0.000149543
Hoxa1	305.28	0.64708	0.215193	3.00697	0.00263865	0.00907385
Slc9a6	4503.09	0.646633	0.122725	5.26895	1.37204e-07	1.30349e-06
Nub1	7798.74	0.646066	0.12696	5.08874	3.60458e-07	3.18343e-06
Ssh1	331.467	0.646045	0.233607	2.76552	0.00568319	0.0176395
Mex3c	3608.48	0.645723	0.132159	4.88596	1.02924e-06	8.28433e-06
Gpr146	1229.91	0.645305	0.216807	2.9764	0.00291652	0.00993186
Plekhg5	411.179	0.645254	0.244271	2.64155	0.00825276	0.0241665
Phf8	4404.8	0.64513	0.153747	4.19606	2.71599e-05	0.00016347
Ccdc28b	240.218	0.645112	0.234785	2.74768	0.0060019	0.0184499
Tbc1d23	6356.54	0.644843	0.132876	4.85297	1.21623e-06	9.70595e-06
Slc9a1	2934.89	0.644696	0.152762	4.22025	2.44031e-05	0.000149314
2810403A07Rik	4170.39	0.644589	0.147174	4.37979	1.18794e-05	7.77686e-05
Nckap5l	1141.02	0.643068	0.224877	2.85964	0.00424122	0.0137642
Nckipsd	958.209	0.642881	0.175356	3.66614	0.000246238	0.00115838
Synj1	3693.51	0.64225	0.136486	4.7056	2.53121e-06	1.89219e-05
Plxna1	3334.79	0.642121	0.162906	3.94167	8.09161e-05	0.000434112
Hyal2	932.481	0.641702	0.155313	4.13167	3.60134e-05	0.000209805
Satb2	1023.9	0.641212	0.163946	3.91111	9.1872e-05	0.000486546
Map4k5	1462.09	0.641096	0.139796	4.58594	4.51951e-06	3.21135e-05
Ash1l	4842.36	0.640529	0.146482	4.37276	1.22685e-05	8.00576e-05
Mbtd1	2065.67	0.640482	0.136779	4.6826	2.83257e-06	2.09942e-05
Klhl24	5093.5	0.640363	0.174682	3.66589	0.000246484	0.00115864
Zscan29	1162.17	0.640112	0.163011	3.92679	8.60855e-05	0.000458896
Pcnxl4	802.141	0.64011	0.170645	3.75113	0.000176038	0.000863862
Scd1	4445.93	0.63952	0.196716	3.25098	0.00115008	0.00446292
Zfyve26	2838.01	0.639221	0.134398	4.75618	1.97286e-06	1.51378e-05
Lrp10	4733.35	0.638994	0.136891	4.66791	3.04272e-06	2.24152e-05
Tmem38b	22750.5	0.638912	0.133074	4.80117	1.57743e-06	1.2306e-05
Rsf1	2538.57	0.63806	0.139309	4.58017	4.64606e-06	3.2931e-05
Nav1	5010.93	0.638034	0.159405	4.0026	6.26511e-05	0.000344227
Idh1	25358.1	0.637586	0.181686	3.50928	0.000449328	0.0019727
Slc12a7	3381.84	0.637353	0.123293	5.16941	2.3484e-07	2.13283e-06
Tspyl2	851.57	0.637241	0.164867	3.86518	0.000111005	0.000575356
Tspan5	1363.16	0.636622	0.155089	4.10487	4.0454e-05	0.000232119
Usp9x	7575.98	0.636575	0.152254	4.18101	2.90216e-05	0.000173218
Btaf1	4482.15	0.636557	0.139779	4.55403	5.26277e-06	3.6894e-05
Cers5	4632.44	0.636549	0.12329	5.16301	2.43007e-07	2.1988e-06
Tes	3311.36	0.636476	0.149901	4.24598	2.17641e-05	0.000134656
Vps37b	1604.08	0.635441	0.144614	4.39406	1.11255e-05	7.33461e-05
Arih1	9485.84	0.63541	0.119361	5.32342	1.01832e-07	9.93026e-07
Rreb1	3087.46	0.634726	0.139334	4.55545	5.22747e-06	3.66888e-05
Diap1	7182.32	0.634692	0.123145	5.15402	2.54957e-07	2.29859e-06
Ttpal	3270.28	0.634195	0.143373	4.42339	9.71654e-06	6.47238e-05
Sowahc	2322.07	0.633878	0.163937	3.86659	0.000110366	0.000572772
Trove2	4791.84	0.632957	0.152326	4.15528	3.24896e-05	0.00019083
Ncs1	1557.8	0.632734	0.156277	4.0488	5.14803e-05	0.000288053
Lrp8	1658.89	0.631746	0.161651	3.90808	9.30339e-05	0.000491629
Vsig10	779.751	0.631434	0.177878	3.54981	0.000385515	0.00172236
Prkce	231.611	0.631321	0.252304	2.50223	0.0123414	0.0340348
Tceb3	4449.89	0.631206	0.124262	5.07964	3.78154e-07	3.32524e-06
Fbxl19	1231.3	0.630696	0.174525	3.61378	0.000301765	0.00138532
Herpud1	4829.54	0.630644	0.155717	4.04995	5.12293e-05	0.000287045
Zfpm1	1196.73	0.629645	0.152252	4.13556	3.54093e-05	0.000206682
Slc37a1	774.538	0.629519	0.176822	3.56018	0.000370602	0.00166245
Clip2	1680.3	0.629513	0.13618	4.62267	3.78827e-06	2.73772e-05
Maged2	487.654	0.628888	0.243245	2.58541	0.00972634	0.0277863
Gpatch11	1172.74	0.62886	0.156217	4.02555	5.68428e-05	0.000315304
Ppp1r10	4297.02	0.62819	0.127677	4.92014	8.64843e-07	7.07334e-06
Klc2	1927.42	0.627236	0.134751	4.65477	3.24343e-06	2.37073e-05
Mblac2	682.759	0.627165	0.1846	3.39743	0.000680211	0.00283111
Clock	3601.19	0.626912	0.139197	4.50378	6.67568e-06	4.5926e-05
Mbd5	922.116	0.626313	0.167191	3.74609	0.00017961	0.000879263
Actn1	7686.28	0.626163	0.141619	4.42147	9.80315e-06	6.5158e-05
Prkcd	11602.5	0.625954	0.139913	4.47387	7.68152e-06	5.23721e-05
Zfp654	951.851	0.625828	0.16125	3.8811	0.000103987	0.000542441
Atp6v1e1	4928.23	0.625552	0.12124	5.15962	2.47447e-07	2.23566e-06
Chsy1	1708.82	0.625548	0.133439	4.68791	2.76012e-06	2.04946e-05
Mdm2	6787.2	0.625426	0.137221	4.55781	5.16892e-06	3.63197e-05
Dennd5a	5484.15	0.625307	0.14268	4.38257	1.17287e-05	7.69477e-05
Rab43	2064.27	0.624793	0.194624	3.21026	0.00132614	0.00503089
Il18rap	525.048	0.624145	0.191911	3.25226	0.00114492	0.00444456
Galnt7	18481.8	0.624097	0.127632	4.8898	1.00938e-06	8.15141e-06
Dhrs11	414.653	0.624076	0.194667	3.20586	0.00134661	0.00509742
BC022687	291.487	0.623805	0.233528	2.67122	0.00755765	0.0223896
Zc3h10	1477.5	0.623309	0.148698	4.19178	2.76769e-05	0.000166171
Tiparp	2750.6	0.622944	0.129455	4.81207	1.49376e-06	1.17133e-05
Tmem263	1159.54	0.622877	0.179852	3.46327	0.000533648	0.00229569
Stx5a	2343.81	0.622128	0.1296	4.80038	1.58366e-06	1.23467e-05
Bcl2	1722.3	0.622005	0.143028	4.34883	1.36869e-05	8.83655e-05
Lrsam1	856.266	0.621878	0.155279	4.00492	6.20392e-05	0.000341246
Phlpp1	1287.04	0.621858	0.168987	3.67992	0.000233306	0.00110371
Hcfc1r1	932.02	0.621606	0.180431	3.44513	0.000570792	0.00243738
Daglb	3661.82	0.620742	0.160961	3.85648	0.000115031	0.000592686
Pcgf2	853.935	0.620604	0.155789	3.98363	6.78714e-05	0.000370568
Mocos	570.137	0.620604	0.199958	3.10367	0.00191138	0.00687802
Acvr2a	628.108	0.620169	0.176113	3.52144	0.000429214	0.00189533
Pkd1	2756.69	0.619823	0.13731	4.51403	6.3606e-06	4.40071e-05
Pvrl1	4782.65	0.61956	0.125258	4.94626	7.56534e-07	6.25052e-06
Aph1b	422.717	0.619163	0.210483	2.94163	0.0032649	0.010949
D930016D06Rik	297.068	0.618389	0.245424	2.51967	0.0117464	0.0326081
Prdm15	967.605	0.618372	0.186467	3.31625	0.000912342	0.00365527
Mapkbp1	1036.61	0.617702	0.160961	3.83759	0.000124245	0.000634788
Dtx4	4802.38	0.617493	0.162749	3.79413	0.00014816	0.000739722
Tmem115	1702.96	0.616638	0.134147	4.59674	4.2916e-06	3.06687e-05
Cln8	7435.3	0.616253	0.119062	5.17591	2.26807e-07	2.06759e-06
Abcc1	10178.2	0.615689	0.155817	3.95137	7.77049e-05	0.000418622
Alg11	1234.5	0.614863	0.142861	4.30392	1.67805e-05	0.000106253
Prdx5	4191.63	0.614039	0.135064	4.54629	5.46001e-06	3.8123e-05
Bcl2a1d	1263.77	0.613896	0.146471	4.19124	2.77429e-05	0.000166485
Slc39a7	8870.65	0.613557	0.11783	5.20715	1.91762e-07	1.77336e-06
Fbxo38	3375.95	0.613383	0.131177	4.676	2.92527e-06	2.16154e-05
Map3k8	467.774	0.613295	0.218264	2.80987	0.00495613	0.0157401
Copb2	9850.76	0.613102	0.126857	4.833	1.3449e-06	1.06351e-05
1110007C09Rik	4230.7	0.612221	0.1241	4.9333	8.08503e-07	6.63485e-06
Ddit4	480.858	0.612187	0.189441	3.23154	0.00123124	0.00472391
Mlec	24388.4	0.612063	0.123034	4.97474	6.53345e-07	5.44603e-06
Klf6	13744.6	0.611633	0.132113	4.62962	3.66336e-06	2.65534e-05
Atrn	17219.6	0.61153	0.126862	4.82043	1.43252e-06	1.12767e-05
Nfkbia	8884.71	0.611506	0.154918	3.94728	7.90442e-05	0.000424897
Slc39a13	1508.6	0.611429	0.140779	4.34319	1.40429e-05	9.03768e-05
Calr	40681.7	0.611041	0.12254	4.98646	6.14947e-07	5.15776e-06
Napb	461.153	0.610761	0.19811	3.08294	0.0020497	0.00730504
Ric1	2307.68	0.610163	0.144781	4.21438	2.50468e-05	0.000152792
Man1a	1463.63	0.610153	0.158368	3.85275	0.000116798	0.000601285
Arih2	2366.99	0.609859	0.132017	4.61956	3.84545e-06	2.7774e-05
Il1rl1	1711.94	0.609746	0.188536	3.23411	0.00122024	0.00469309
Mapk1ip1	444.155	0.609712	0.196748	3.09895	0.00194208	0.00696994
Mgat4a	3011.07	0.609639	0.12396	4.91803	8.7421e-07	7.13079e-06
Cd99l2	1345.68	0.609549	0.14992	4.06582	4.78634e-05	0.000270426
Cep97	428.576	0.609286	0.200659	3.03642	0.00239405	0.00833876
Cds2	3153.51	0.608673	0.123035	4.94716	7.53051e-07	6.22597e-06
Adam10	12238.1	0.608224	0.116404	5.22511	1.74054e-07	1.62317e-06
Brwd3	709.564	0.608092	0.184431	3.29713	0.000976784	0.00387466
Stx6	2232.18	0.60749	0.144996	4.18969	2.79336e-05	0.000167381
B630005N14Rik	7211.77	0.607471	0.15853	3.83191	0.000127153	0.000646387
Stam	2042.88	0.607456	0.136278	4.45747	8.29317e-06	5.6071e-05
Bbx	5332.32	0.606479	0.148267	4.09044	4.30562e-05	0.000245201
Tnpo2	6419.62	0.605384	0.123202	4.91373	8.93581e-07	7.27417e-06
Ypel3	1102.18	0.605286	0.255966	2.36471	0.0180441	0.0466731
Aff1	4021.36	0.605182	0.134272	4.50714	6.57078e-06	4.52362e-05
Gbf1	3885.42	0.603696	0.144651	4.17348	2.99981e-05	0.000178328
Dock5	2761.43	0.603326	0.141528	4.26295	2.01749e-05	0.000126106
Mark4	1691.11	0.602565	0.142998	4.2138	2.51107e-05	0.000153105
Atp6v1d	3476.2	0.602363	0.148615	4.05317	5.05281e-05	0.000283638
Cldnd1	1852.21	0.602095	0.1421	4.23714	2.26389e-05	0.000139361
Gclm	2909.48	0.601897	0.219698	2.73965	0.00615045	0.0188304
Wdr7	3513.1	0.601859	0.15219	3.95465	7.66453e-05	0.000413463
Fgr	5043.88	0.601216	0.123926	4.85143	1.22576e-06	9.77557e-06
Arap1	9803.66	0.600966	0.141526	4.24634	2.17293e-05	0.000134556
Scamp1	3620.93	0.600686	0.149185	4.02645	5.66261e-05	0.000314257
Usp31	3058.5	0.599616	0.147245	4.07224	4.65636e-05	0.000263817
Lrrc42	1824.37	0.599525	0.134648	4.45253	8.48627e-06	5.7186e-05
Irx2	1731.55	0.599401	0.167211	3.58469	0.000337475	0.00152793
Tmem206	2286.98	0.599143	0.13276	4.51298	6.39242e-06	4.42022e-05
Lmbr1l	416.706	0.599032	0.192627	3.10981	0.0018721	0.00675865
Iqsec1	3120.07	0.597299	0.163742	3.64781	0.000264488	0.00123232
Nfkbib	1633.03	0.59665	0.145497	4.10076	4.11795e-05	0.00023606
Baz2b	2632.18	0.59659	0.157391	3.79051	0.00015034	0.00074985
Nacc2	571.14	0.596463	0.242686	2.45776	0.0139807	0.0377514
Sepw1	1249.28	0.595873	0.143251	4.15964	3.18755e-05	0.000187766
Heatr5b	2494.37	0.595797	0.142007	4.19556	2.72198e-05	0.000163749
Plod3	6979.26	0.59475	0.128387	4.63247	3.6133e-06	2.62531e-05
Eaf1	5599.23	0.594083	0.147787	4.01985	5.82356e-05	0.000322149
Tmem39a	1974.25	0.593723	0.143301	4.1432	3.42498e-05	0.000200465
Fam8a1	685.722	0.593559	0.179167	3.31288	0.000923402	0.00368936
Ncor2	5290.76	0.593528	0.148857	3.98723	6.68497e-05	0.000365481
Isyna1	5770.04	0.593244	0.131056	4.52664	5.99282e-06	4.16045e-05
Prdx1	46194	0.593065	0.160016	3.70628	0.000210328	0.00100735
Zfp608	261.636	0.592488	0.246365	2.40492	0.0161758	0.0426658
Sipa1l3	1805.37	0.592483	0.148212	3.99753	6.40056e-05	0.000351194
Sod2	6874.58	0.592294	0.141791	4.17722	2.95088e-05	0.00017561
Amfr	6945.64	0.591868	0.13018	4.54655	5.45323e-06	3.80975e-05
Leng1	498.702	0.591864	0.186466	3.17412	0.00150292	0.00559172
Crtc3	1268.27	0.591467	0.142088	4.16268	3.14535e-05	0.00018573
Fkbpl	688.675	0.591348	0.169912	3.48033	0.000500804	0.00217593
Kansl1l	1257.9	0.591182	0.18244	3.24041	0.00119357	0.00460841
Tnfaip1	4705.48	0.591031	0.129769	4.5545	5.25105e-06	3.6833e-05
Jmjd1c	7261.33	0.591017	0.124393	4.75119	2.02219e-06	1.54489e-05
Tapt1	1871.55	0.590859	0.142131	4.15714	3.22255e-05	0.000189461
Tvp23b	1636	0.590516	0.142906	4.13221	3.59297e-05	0.000209418
Car5b	2418.94	0.589706	0.133933	4.40299	1.0677e-05	7.06577e-05
Zfp281	1669.46	0.589003	0.154157	3.8208	0.000133019	0.000673113
Ccdc109b	2190.8	0.588397	0.132863	4.42859	9.48529e-06	6.33915e-05
Copa	17448.9	0.587344	0.12405	4.73471	2.19365e-06	1.66127e-05
Zfp658	292.892	0.587211	0.229612	2.5574	0.0105457	0.0297383
Stk10	5376.56	0.58589	0.148642	3.94161	8.09368e-05	0.000434112
Gpr84	2667.21	0.58575	0.166323	3.52177	0.000428681	0.00189367
Rac2	25861.1	0.585106	0.112287	5.21081	1.88013e-07	1.74134e-06
Mon2	4387.63	0.585099	0.139642	4.19	2.7896e-05	0.000167241
Abr	21482.7	0.584536	0.127527	4.58362	4.56992e-06	3.24291e-05
Pik3r5	11600.7	0.584506	0.117594	4.97054	6.67672e-07	5.56165e-06
Card6	432.37	0.584475	0.193142	3.02614	0.00247699	0.00858833
Rlim	6793.66	0.5842	0.138842	4.20765	2.58035e-05	0.000156623
Trp53bp2	769.958	0.584066	0.170376	3.4281	0.000607833	0.00257836
Csnk1g1	1821.88	0.583677	0.160141	3.64476	0.000267638	0.00124587
Socs7	2054.7	0.583103	0.137003	4.25613	2.07998e-05	0.000129546
Kif21b	4885.51	0.582916	0.123395	4.72397	2.31287e-06	1.74397e-05
Fbxo28	1890.62	0.582508	0.142377	4.0913	4.28961e-05	0.000244403
Dstyk	1299.2	0.581278	0.15495	3.75139	0.000175859	0.000863332
Csf1r	126100	0.581239	0.134375	4.32551	1.52181e-05	9.73734e-05
Dcaf5	2133.07	0.581177	0.132576	4.38373	1.16663e-05	7.65799e-05
Actr1b	4147.47	0.580149	0.12759	4.54699	5.44183e-06	3.80397e-05
Gigyf2	4238.62	0.57936	0.136239	4.25253	2.11369e-05	0.000131377
Sbno1	7887.64	0.579295	0.127704	4.53621	5.72729e-06	3.98976e-05
Mknk2	6683.39	0.578893	0.131376	4.4064	1.05104e-05	6.95926e-05
Rgp1	2338.46	0.578863	0.129754	4.46123	8.14894e-06	5.52802e-05
Rusc1	1175.57	0.578547	0.155063	3.73104	0.000190691	0.000927174
Tgif1	3712.43	0.576099	0.128244	4.49219	7.04931e-06	4.83052e-05
Tirap	1311.54	0.575716	0.159749	3.60388	0.000313508	0.0014322
Necap1	3590.52	0.575692	0.122699	4.69191	2.70663e-06	2.0122e-05
Fastkd3	1418.25	0.575438	0.149666	3.84481	0.000120646	0.000618215
Itsn2	5108.75	0.57511	0.133982	4.29245	1.76714e-05	0.000111353
Clec5a	13374.9	0.574955	0.165964	3.46433	0.000531556	0.0022875
Phldb3	299.401	0.574887	0.239361	2.40175	0.0163167	0.0429736
Lrrc8a	1394.74	0.574063	0.144342	3.97711	6.97581e-05	0.000379846
Asb6	1496.83	0.5734	0.137213	4.1789	2.92923e-05	0.000174578
Rab5b	5596.2	0.57297	0.128828	4.44757	8.6848e-06	5.84591e-05
Gpsm3	2947.25	0.572646	0.147502	3.8823	0.000103472	0.000540219
Smim14	2845.36	0.572019	0.166626	3.43294	0.000597065	0.00253888
Cers6	4377.32	0.571175	0.13835	4.12847	3.65186e-05	0.000212545
Vps13d	3489.07	0.571019	0.176944	3.22712	0.00125044	0.00478699
Fbxl12	315.178	0.571006	0.214647	2.66021	0.00780929	0.0230509
Ppme1	2734.04	0.570656	0.132995	4.2908	1.78029e-05	0.000112028
Zbtb34	977.737	0.570559	0.169766	3.36085	0.000777021	0.00317327
Ppap2a	1964.47	0.570423	0.152786	3.73347	0.000188857	0.000920094
Arhgef7	13584.6	0.5704	0.123306	4.62588	3.73003e-06	2.70045e-05
Zkscan5	481.432	0.57038	0.18337	3.11055	0.00186741	0.00674774
Ier2	2764.23	0.570139	0.136454	4.17826	2.93752e-05	0.000174925
Tmx4	2710.45	0.56977	0.126563	4.50186	6.7361e-06	4.62893e-05
Tmf1	2054.98	0.569625	0.134656	4.23024	2.33445e-05	0.000143269
C2cd2l	1918.84	0.569459	0.143587	3.96594	7.31072e-05	0.000396663
Rgs11	576.341	0.569202	0.21483	2.64954	0.00806003	0.0237106
Plekhb2	6532.41	0.569064	0.138322	4.11406	3.88757e-05	0.000224226
Sash1	4875.65	0.569022	0.128384	4.43218	9.32832e-06	6.24454e-05
Foxp4	2307.52	0.568843	0.130004	4.37558	1.2111e-05	7.91573e-05
Helz	1463.8	0.568698	0.165753	3.431	0.00060137	0.00255362
Chd4	20268.1	0.568554	0.123793	4.59279	4.37355e-06	3.11746e-05
Bcl10	3332.58	0.568341	0.122802	4.62811	3.69024e-06	2.67323e-05
Jak3	1029.99	0.568318	0.161306	3.52322	0.000426335	0.00188536
BC037034	1370.38	0.567717	0.154299	3.67933	0.00023385	0.00110565
Srebf2	13913.8	0.567348	0.12065	4.70242	2.57092e-06	1.91717e-05
Anxa7	6636.81	0.566184	0.116641	4.85409	1.20941e-06	9.66413e-06
Zfp655	2585.15	0.565997	0.137559	4.11457	3.879e-05	0.000223944
Rasal1	613.436	0.565742	0.17359	3.25908	0.00111775	0.0043474
Gosr2	5832.19	0.565415	0.120784	4.68122	2.85176e-06	2.11107e-05
Rlf	2008.64	0.565011	0.152198	3.71234	0.000205352	0.000987019
Fry	360.004	0.564389	0.216123	2.61142	0.00901659	0.0260584
Kpna1	5103.75	0.563397	0.129275	4.35812	1.31183e-05	8.51014e-05
Ddx6	11026.5	0.563301	0.130488	4.31687	1.58261e-05	0.000100945
Naa30	1780.72	0.562555	0.142698	3.94228	8.0711e-05	0.000433283
Pou6f1	325.423	0.562499	0.22896	2.45676	0.0140198	0.0378234
Tet2	1709.85	0.562197	0.15951	3.52453	0.000424233	0.00187811
Pigx	755.185	0.561174	0.164725	3.40673	0.000657453	0.00275714
Elk4	1200.14	0.560932	0.171223	3.27603	0.00105279	0.00413837
Crtc2	3269.29	0.560698	0.135	4.15334	3.27663e-05	0.000192362
Sec24b	4429.93	0.559975	0.137704	4.06652	4.77206e-05	0.000269745
Slc31a2	1558.77	0.559221	0.199607	2.80161	0.00508478	0.0160607
Cds1	569.331	0.5592	0.200043	2.7954	0.00518349	0.0163216
Gsap	4292.56	0.558188	0.149215	3.74084	0.000183403	0.000896031
Mllt6	5137.12	0.556841	0.128301	4.34011	1.42409e-05	9.16021e-05
Mical2	1898.49	0.556758	0.140791	3.95451	7.66929e-05	0.000413537
Dhx32	1421.31	0.555912	0.138202	4.02247	5.75913e-05	0.00031902
Hsp90b1	46769.1	0.555646	0.130366	4.26221	2.02413e-05	0.000126456
Ifi203	3271.93	0.5556	0.126987	4.37524	1.213e-05	7.92386e-05
Cramp1l	1679.12	0.555284	0.151562	3.66374	0.00024856	0.00116665
Foxo1	859.206	0.554946	0.156794	3.53934	0.000401135	0.00178557
Zcchc2	2468.04	0.554774	0.131177	4.22919	2.34529e-05	0.000143862
Vcl	2718.55	0.554732	0.166794	3.32584	0.000881516	0.00355233
Exoc5	4754.22	0.554566	0.124219	4.46442	8.02846e-06	5.44932e-05
Fbxo11	3116.69	0.554188	0.132068	4.19622	2.71405e-05	0.000163434
Atp2a2	24931.1	0.553812	0.143361	3.86307	0.000111971	0.000578884
Ncoa7	2330.8	0.553078	0.134117	4.12385	3.72599e-05	0.000216337
Nfe2l2	13878	0.552785	0.129198	4.2786	1.88073e-05	0.000117982
Anxa6	4920.84	0.552491	0.177921	3.10526	0.00190111	0.00684712
Dcp2	2810.22	0.551649	0.126803	4.35045	1.35859e-05	8.78069e-05
Ptchd1	3257.5	0.551584	0.178029	3.09829	0.00194641	0.00698342
Cuedc1	987.391	0.551512	0.153173	3.60058	0.000317504	0.00144829
Rnf41	2803.48	0.551231	0.129563	4.25453	2.09489e-05	0.000130275
Cul7	404.661	0.550329	0.195054	2.82142	0.00478115	0.0152586
Tmed4	3088.96	0.550214	0.124094	4.43386	9.25594e-06	6.19949e-05
Atg101	1390.15	0.549847	0.148151	3.71139	0.000206122	0.000989866
Lztfl1	1143.45	0.549387	0.147596	3.72223	0.000197467	0.000955537
Arl8a	5095.79	0.548772	0.121021	4.53453	5.77331e-06	4.01577e-05
Slc36a4	1720.01	0.54862	0.135226	4.05707	4.9693e-05	0.000279465
Paip2	3752.83	0.548593	0.125442	4.37329	1.22386e-05	7.99055e-05
Trim41	2782.75	0.547882	0.139358	3.93147	8.44292e-05	0.000451055
Tmem184b	6221.76	0.547493	0.126307	4.33463	1.46006e-05	9.36193e-05
Fbxw7	1768.26	0.546631	0.139204	3.92684	8.60697e-05	0.000458896
Tmem65	927.661	0.545952	0.156471	3.48917	0.000484526	0.00211048
Yipf6	2378.42	0.545472	0.133167	4.09615	4.20071e-05	0.000239864
Tut1	1677.71	0.545275	0.134812	4.0447	5.23893e-05	0.000292601
Scamp5	1570.77	0.544422	0.150651	3.61379	0.000301756	0.00138532
Lrrc58	6586.25	0.544111	0.132804	4.09708	4.18393e-05	0.000239054
Sh3pxd2a	1289.48	0.54397	0.166415	3.26875	0.00108024	0.00422311
Kantr	531.766	0.543787	0.194546	2.79515	0.00518754	0.0163301
Saraf	4701.89	0.543591	0.129038	4.21263	2.52419e-05	0.000153827
Rgl1	3285.74	0.543315	0.142882	3.80254	0.000143218	0.000718452
Trim56	1376.09	0.543181	0.162716	3.33822	0.000843158	0.00341131
Prdm2	2436.92	0.542274	0.159122	3.40791	0.000654635	0.00275006
Zfp142	1156.01	0.542148	0.17632	3.07479	0.00210649	0.00748059
Cwc25	1293.09	0.541971	0.142161	3.81238	0.000137637	0.000695039
Map4	6661.88	0.541741	0.128672	4.21025	2.55088e-05	0.000155066
Tmem127	2717.28	0.541486	0.148639	3.64295	0.000269531	0.00125294
Cnnm2	769.052	0.541413	0.159913	3.38567	0.000710043	0.00293829
Itfg3	3738.01	0.540742	0.145373	3.71969	0.000199466	0.000964442
Spg20	1479.39	0.540716	0.137204	3.94098	8.11502e-05	0.000435065
Rps6kc1	1528.21	0.540654	0.136929	3.94842	7.86673e-05	0.000423245
Ehbp1l1	8656.45	0.540562	0.136121	3.97119	7.15137e-05	0.00038871
Fyttd1	4791.17	0.540126	0.120737	4.47358	7.69203e-06	5.24144e-05
Sptlc2	3645.94	0.539875	0.131004	4.12106	3.77133e-05	0.000218766
Trip12	13617.5	0.539331	0.136915	3.93916	8.1768e-05	0.000437991
Ube2o	1902.44	0.538987	0.156089	3.45309	0.000554213	0.00237484
Oaz2	1606.67	0.538646	0.142882	3.76987	0.000163332	0.00080639
Rnf181	2681.04	0.538265	0.127891	4.20877	2.56765e-05	0.000156007
Pramef8	1248.19	0.53822	0.144478	3.72527	0.000195108	0.000944871
Natd1	561.878	0.537183	0.212925	2.52288	0.0116398	0.0323615
Zfp874b	515.112	0.537163	0.197949	2.71364	0.00665478	0.0201164
8030462N17Rik	1380.34	0.53691	0.147676	3.63572	0.000277204	0.00128468
Tmem199	2340.62	0.536893	0.130506	4.11395	3.88953e-05	0.000224233
Tnks2	7900.26	0.536786	0.12904	4.15985	3.18455e-05	0.00018768
Ero1lb	2829.41	0.535734	0.125005	4.28572	1.82152e-05	0.000114504
Arfgef1	7854.18	0.535458	0.122222	4.38104	1.18113e-05	7.73785e-05
Vps13b	4889.95	0.534415	0.13251	4.03303	5.50619e-05	0.000306543
Mgat5	671.179	0.534318	0.174399	3.06377	0.0021857	0.00771321
Litaf	12876.3	0.533338	0.164429	3.24359	0.00118035	0.00456464
Dpysl2	2054.03	0.533293	0.141336	3.77324	0.000161144	0.000796881
Pi4ka	6939.5	0.533276	0.141146	3.7782	0.000157966	0.000782756
Map7d1	8628.71	0.533099	0.117559	4.53475	5.76713e-06	4.01522e-05
Tollip	5162.31	0.532896	0.122361	4.35512	1.32991e-05	8.61824e-05
Csf2ra	6746.24	0.532817	0.134027	3.97546	7.02446e-05	0.000381982
Aamp	5754.57	0.532723	0.119802	4.44668	8.72071e-06	5.86684e-05
Anxa2	22392.6	0.532427	0.140823	3.78081	0.000156319	0.000775888
Sos1	2483.14	0.532405	0.146218	3.64117	0.000271401	0.00126019
Tbc1d25	768.635	0.531811	0.165269	3.21786	0.00129151	0.00491946
Dhcr7	3746.1	0.531402	0.163824	3.24373	0.00117976	0.0045638
Brwd1	1551.37	0.531392	0.169332	3.13817	0.00170006	0.00622189
Hyal1	589.966	0.531308	0.173881	3.05559	0.00224619	0.00788467
Shc1	9403.34	0.531045	0.142001	3.73972	0.000184224	0.000899321
Rab10	13362.4	0.531027	0.114991	4.61799	3.87478e-06	2.7903e-05
Desi2	2812.21	0.530976	0.124602	4.26137	2.03177e-05	0.000126868
Uso1	6520.04	0.530826	0.124371	4.26809	1.97154e-05	0.000123297
Kif3b	2122.83	0.530802	0.129656	4.09393	4.24118e-05	0.000241984
Bend4	3804.66	0.530761	0.147394	3.60096	0.000317046	0.00144674
Nr1h2	3105.21	0.52954	0.123484	4.28831	1.80034e-05	0.000113231
Copb1	10028.7	0.528788	0.124266	4.25528	2.0879e-05	0.000129965
Trappc9	1545.37	0.52793	0.135882	3.88521	0.000102242	0.000534717
B3gnt3	728.387	0.527767	0.177827	2.96787	0.00299867	0.0101767
Atg13	5956.89	0.526841	0.144175	3.65419	0.000257999	0.00120671
Bod1l	2608.64	0.526645	0.168272	3.12973	0.00174966	0.00638292
Slc20a1	5140.63	0.526154	0.159264	3.30365	0.000954359	0.0037956
Tusc2	765.525	0.525095	0.172949	3.03613	0.00239634	0.00834432
Gbe1	804.654	0.525068	0.163685	3.20779	0.00133757	0.00506795
Arf4	7687.35	0.524928	0.160051	3.27976	0.00103896	0.00409065
Frs2	1629.34	0.524913	0.135874	3.86324	0.000111891	0.000578712
Ube3a	4835.93	0.524289	0.128955	4.06566	4.78963e-05	0.000270487
Pomgnt1	2068.86	0.524089	0.130747	4.00843	6.11228e-05	0.00033659
Nrbp1	2893.48	0.523857	0.127779	4.0997	4.13695e-05	0.000236925
Eea1	8150.78	0.523595	0.135288	3.87023	0.000108732	0.000565016
March6	5804.72	0.523263	0.131965	3.96515	7.33498e-05	0.000397625
Pdia4	5547.87	0.523034	0.129253	4.04659	5.19689e-05	0.00029052
1110008P14Rik	747.176	0.52226	0.163639	3.19154	0.00141515	0.00531436
Zfand2a	3473.98	0.522092	0.151071	3.45594	0.000548371	0.0023532
Slfn2	8078.26	0.521838	0.16573	3.14872	0.0016399	0.00601855
Numb	4576.36	0.521484	0.146334	3.56365	0.000365737	0.00164426
Tox4	4179.79	0.521328	0.123993	4.20451	2.61652e-05	0.000158423
Nans	4516.85	0.521066	0.135417	3.84787	0.000119151	0.00061184
Phospho1	1076.26	0.520891	0.167942	3.10161	0.00192474	0.00691838
Ggps1	975.604	0.520464	0.149465	3.48217	0.000497374	0.0021618
Nrip1	542.408	0.520185	0.180892	2.87567	0.00403177	0.0131581
Pttg1ip	3163.3	0.52017	0.12254	4.24489	2.18705e-05	0.000134971
Sgsm3	2652.12	0.520126	0.142791	3.64255	0.000269946	0.00125439
S100a10	10718.5	0.520078	0.152718	3.40548	0.000660489	0.00276796
Klhl18	860.016	0.51938	0.160056	3.24499	0.00117455	0.00454653
Zbtb11	1913.29	0.518888	0.138052	3.75865	0.000170833	0.000840016
Ammecr1l	3285.42	0.518794	0.141967	3.65434	0.000257847	0.00120646
Twsg1	6903.46	0.518392	0.123568	4.19521	2.7262e-05	0.000163841
Mcemp1	1088.02	0.518133	0.19325	2.68115	0.00733689	0.0218313
Ripk3	2018.8	0.517952	0.138235	3.74688	0.000179045	0.00087718
Atox1	2530.94	0.517849	0.13127	3.9449	7.98328e-05	0.000428947
Snap23	2999.15	0.516561	0.15865	3.25598	0.00113003	0.00439378
Tulp3	1405.05	0.51646	0.15148	3.40944	0.000650966	0.00273937
Akap9	2537.43	0.516375	0.15824	3.26325	0.00110144	0.00429769
Stom	52555.4	0.516193	0.109548	4.71204	2.45255e-06	1.8379e-05
Ero1l	6447.4	0.515993	0.156206	3.30328	0.000955607	0.00379846
Mospd1	755.982	0.515979	0.174138	2.96305	0.00304605	0.0103031
Zfp592	1973.45	0.51569	0.134874	3.8235	0.000131569	0.000666608
Zfp51	510.324	0.515129	0.179456	2.8705	0.00409817	0.0133426
Epg5	1793.51	0.514853	0.140627	3.66111	0.000251122	0.0011768
Gltscr1	833.214	0.513684	0.169998	3.02171	0.00251352	0.00868526
Sh2b2	1111.18	0.513587	0.151843	3.38235	0.000718681	0.00296688
Rnf44	4382.59	0.513511	0.120958	4.24537	2.18233e-05	0.000134817
Pex16	1197.18	0.512637	0.160436	3.19528	0.00139695	0.00526181
Diap2	2348.08	0.512086	0.145899	3.50986	0.000448341	0.00196979
Zdhhc20	7509.51	0.511703	0.122144	4.18935	2.79758e-05	0.00016747
Plcb4	4452.94	0.511666	0.147151	3.47716	0.000506753	0.00219786
Ncoa6	2729.12	0.511187	0.14998	3.40837	0.000653514	0.00274727
Dennd1b	2030.84	0.511104	0.164328	3.11027	0.00186915	0.00675202
Rab22a	1879.6	0.510666	0.143014	3.57075	0.000355956	0.00160444
Zfp46	907.605	0.51058	0.160653	3.17816	0.00148214	0.00552794
Herc2	4623.62	0.510469	0.147049	3.47142	0.000517714	0.00223901
Gpatch8	2562.48	0.50999	0.133852	3.81011	0.000138904	0.000700275
Tbrg1	4826.99	0.509948	0.124754	4.08762	4.35822e-05	0.000247733
Ascc3	3489.62	0.508604	0.141634	3.59099	0.000329429	0.00149539
Papolg	889.349	0.507867	0.154358	3.29019	0.00100119	0.003956
AI597479	1824.26	0.507707	0.132217	3.83996	0.000123056	0.00062924
Fam46a	855.497	0.507219	0.187689	2.70244	0.00688317	0.0206888
Rrbp1	11045.2	0.507142	0.129566	3.91417	9.07166e-05	0.000481055
Vat1	25199.1	0.506957	0.183177	2.76758	0.00564734	0.0175596
Pnpla6	1701.7	0.506	0.146743	3.4482	0.000564346	0.00241494
Slc37a2	4132.46	0.505885	0.164688	3.07177	0.00212793	0.00754134
Setx	4012.49	0.505832	0.14556	3.47508	0.000510692	0.00221257
Itpripl2	6754.21	0.505793	0.129305	3.91162	9.16809e-05	0.000485957
Gna13	12618.2	0.505782	0.123214	4.1049	4.04493e-05	0.000232119
Cyth4	22239.7	0.505041	0.116475	4.33603	1.45082e-05	9.30758e-05
Zbtb38	1325.98	0.504882	0.149933	3.36739	0.000758835	0.00310839
Slc30a7	4366.21	0.504735	0.122602	4.11684	3.84095e-05	0.000221853
Dgkd	13707.3	0.504682	0.116124	4.34606	1.38602e-05	8.9295e-05
Golph3	6553.21	0.504577	0.129742	3.88909	0.000100622	0.000526695
Cbll1	1497.93	0.504241	0.143163	3.52215	0.000428059	0.0018916
Tpcn2	1169.58	0.504046	0.150967	3.33879	0.000841448	0.00340666
Whamm	860.323	0.504042	0.157265	3.20505	0.00135037	0.00511006
Wdr26	18378.4	0.503978	0.136632	3.68858	0.000225506	0.00107116
Mvp	6739.57	0.503928	0.131135	3.84281	0.000121631	0.000622216
Fam117a	666.03	0.503916	0.203021	2.48209	0.0130613	0.0356164
Rock1	5334.32	0.503895	0.137065	3.67634	0.000236608	0.00111696
Mtfr1l	2733.62	0.503778	0.132153	3.81207	0.00013781	0.000695623
Dennd4a	3582.54	0.503484	0.126105	3.99259	6.53558e-05	0.000357796
Fnip1	5541.92	0.503093	0.141122	3.56495	0.000363929	0.00163734
Eif1	16571.3	0.502002	0.131747	3.81035	0.000138767	0.000700165
Speg	1219.9	0.501489	0.180738	2.77467	0.00552569	0.017233
Lmbrd2	1691.56	0.501489	0.153252	3.27232	0.0010667	0.00417958
Selo	1513.82	0.501289	0.14209	3.52796	0.000418777	0.00185666
Sec23ip	3694.98	0.501112	0.13739	3.64736	0.000264951	0.00123401
Nfe2l1	15719.5	0.500997	0.132733	3.77448	0.000160343	0.000794212
Atp11a	3128.4	0.500725	0.15323	3.2678	0.00108388	0.00423597
Acsl3	3427.49	0.499975	0.145696	3.43164	0.000599949	0.00255
Gnb5	636.003	0.499974	0.199757	2.50291	0.0123178	0.0339849
Phf13	923.062	0.499922	0.213531	2.34121	0.0192211	0.0493089
Pld1	825.767	0.499592	0.164894	3.02977	0.0024474	0.00849781
Vkorc1l1	2954.57	0.499433	0.128568	3.88459	0.000102502	0.000535847
Ankrd17	8389.53	0.499426	0.139723	3.57441	0.000351022	0.00158278
Ddhd1	931.355	0.499005	0.211318	2.36139	0.0182064	0.0470628
Iqsec2	1069.98	0.498825	0.17022	2.93048	0.00338443	0.0113062
Manf	6103.18	0.498633	0.132399	3.76615	0.000165786	0.000817177
Slc38a2	35938.1	0.498369	0.132305	3.76683	0.000165337	0.000815955
Ghdc	596.168	0.497881	0.181216	2.74745	0.00600614	0.0184583
Arrdc2	632.961	0.496984	0.171154	2.90373	0.00368742	0.012178
Rfxap	766.209	0.496611	0.164126	3.02579	0.00247982	0.00859566
Hk2	5288.45	0.496555	0.137076	3.62249	0.000291781	0.00134558
Narf	1246.47	0.496466	0.161909	3.06632	0.00216709	0.00766487
Snx30	4314.95	0.496298	0.128452	3.86367	0.000111695	0.000578439
Fryl	1610.26	0.495723	0.161495	3.0696	0.00214348	0.007592
Gtf3c1	3684.69	0.495652	0.126963	3.9039	9.46567e-05	0.000498905
Nsun4	958.076	0.495509	0.160559	3.08614	0.00202772	0.007241
Pcgf3	1559.22	0.494902	0.149628	3.30755	0.000941165	0.0037468
Rufy2	1180.96	0.494493	0.15069	3.28153	0.00103245	0.00407028
Ndrg1	9548.08	0.494402	0.113976	4.33779	1.43926e-05	9.24315e-05
Als2	1306.42	0.494302	0.165248	2.99127	0.00277818	0.00950024
Usp24	5919.4	0.493855	0.132902	3.71594	0.000202448	0.000976533
Grina	3926.73	0.493805	0.183012	2.69821	0.00697143	0.0208971
Arid2	3234.12	0.493614	0.127224	3.87989	0.000104503	0.000544671
Bptf	4244.61	0.49355	0.146377	3.37178	0.000746843	0.00306339
Pcf11	3487.54	0.493152	0.153576	3.21114	0.00132211	0.00501872
Nucb2	1791.75	0.492919	0.139598	3.53099	0.000414	0.00183815
Grpel1	3229.99	0.492403	0.129359	3.80647	0.000140963	0.000708892
Pdlim5	3998.47	0.492335	0.150554	3.27017	0.00107485	0.00420472
Kdm3a	2467.04	0.491896	0.133949	3.67228	0.0002404	0.00113354
Kras	3017.07	0.49174	0.152603	3.22236	0.00127139	0.00485498
Clk3	2908.25	0.491414	0.131507	3.73677	0.000186396	0.000909194
Dok3	3205.89	0.491195	0.14683	3.34532	0.000821871	0.00333183
Sfr1	3570.88	0.490751	0.126525	3.87867	0.000105027	0.000546693
1190002N15Rik	1433.36	0.490522	0.159568	3.07407	0.00211161	0.00749448
Triobp	1225.56	0.49035	0.148123	3.31042	0.00093157	0.00371546
Cog3	2425.49	0.489777	0.131703	3.71879	0.00020018	0.000966744
Vipas39	2842.73	0.489593	0.129036	3.79422	0.000148106	0.000739722
Rai14	1469.87	0.4895	0.165816	2.95207	0.00315647	0.0106352
Snx21	401.664	0.488475	0.208904	2.33827	0.0193731	0.0496674
Gas7	45796.8	0.488442	0.157707	3.09715	0.00195389	0.00700821
Rab5a	3405.74	0.488222	0.126753	3.85176	0.000117271	0.000603462
Camk1d	3049.59	0.488005	0.124627	3.91572	9.01342e-05	0.000478383
Atp9b	4711.98	0.487981	0.12056	4.04764	5.17371e-05	0.000289357
Atp2b4	1795.4	0.48784	0.140286	3.47746	0.000506188	0.00219619
Timm8b	941.824	0.487807	0.169903	2.87109	0.00409056	0.013325
Zdhhc17	1305.18	0.487569	0.146958	3.31774	0.000907475	0.00364007
Stk3	1831.79	0.487404	0.14946	3.26109	0.00110986	0.00432223
Siah2	1440.72	0.48735	0.147491	3.30426	0.000952278	0.00378857
Arfgap1	2212.28	0.487229	0.1425	3.41915	0.000628162	0.00265996
Nemf	3320.75	0.486875	0.139637	3.48672	0.000488978	0.00212911
Deptor	1855.6	0.486855	0.166413	2.92558	0.00343814	0.0114448
Map3k11	4330.09	0.486592	0.138585	3.51116	0.000446161	0.00196162
Asl	1654.41	0.486544	0.157258	3.09393	0.00197524	0.0070827
Pkd2	1967.43	0.486517	0.140331	3.46692	0.000526459	0.00226957
Fam109a	685.348	0.486429	0.174707	2.78425	0.0053651	0.0168238
Zdhhc12	680.691	0.485387	0.171365	2.83247	0.00461903	0.0148204
Bmp2k	5221.99	0.485314	0.121884	3.98177	6.84042e-05	0.000372974
Dock2	17849.7	0.484822	0.142307	3.40687	0.000657114	0.00275666
Kdm4c	1556.14	0.484764	0.138213	3.50737	0.000452565	0.00198405
Dnajb11	6030.25	0.484261	0.126834	3.81807	0.000134498	0.000680315
Rab8b	10424.9	0.484188	0.121998	3.96882	7.223e-05	0.000392253
Vwa5a	13525.6	0.483767	0.13346	3.62482	0.000289165	0.00133402
Cdc14a	797.772	0.483462	0.176158	2.74448	0.00606065	0.0185835
Stx4a	3738.91	0.483407	0.155542	3.10789	0.00188429	0.00679258
Smg1	6635.19	0.482924	0.1512	3.19394	0.00140344	0.0052802
Arid4a	2258.54	0.482862	0.131252	3.67889	0.00023425	0.00110712
Arl10	639.46	0.482786	0.186168	2.59329	0.0095064	0.0272968
Cux1	14897.2	0.482737	0.123016	3.92418	8.70273e-05	0.000463106
Pqlc1	2017.97	0.481949	0.138613	3.47695	0.000507146	0.00219878
Ranbp2	9882.65	0.481722	0.146853	3.2803	0.00103695	0.00408404
Herpud2	2923.45	0.481559	0.124781	3.85923	0.000113745	0.000586808
Gda	3479.25	0.481353	0.170814	2.81799	0.00483254	0.0153918
Tmed8	1531.35	0.481353	0.147399	3.26565	0.00109212	0.00426542
D11Wsu47e	649.156	0.481156	0.179118	2.68625	0.00722585	0.0215533
Igf2r	10006.1	0.480962	0.115675	4.15788	3.21217e-05	0.000189034
Acbd5	3657.63	0.48087	0.128342	3.74679	0.000179112	0.00087718
Mid1ip1	5870.65	0.480777	0.134247	3.58129	0.000341902	0.00154625
Nfatc1	4185.3	0.48067	0.125593	3.82721	0.000129603	0.000658294
Cep250	3448.15	0.480655	0.141699	3.39209	0.000693623	0.00287905
Rab6a	6547.67	0.479859	0.121691	3.94327	8.03786e-05	0.000431689
Cacul1	5002.98	0.479696	0.123041	3.89868	9.6718e-05	0.000508888
Tacc1	5490.53	0.478997	0.116667	4.10568	4.03123e-05	0.000231525
Lrp11	660.144	0.478664	0.167711	2.8541	0.00431584	0.0139654
Slc25a44	2480.63	0.478448	0.131409	3.64091	0.000271676	0.00126098
Gpalpp1	2861.85	0.478083	0.132476	3.60884	0.00030757	0.00140772
Chd6	1574.71	0.478025	0.145942	3.27544	0.00105499	0.00414215
Btbd7	1227.63	0.477864	0.150527	3.17461	0.00150036	0.00558517
Lig4	515.053	0.47773	0.20187	2.36653	0.0179559	0.0464845
Pcmtd1	1738.14	0.477184	0.161014	2.96361	0.0030405	0.0102929
Kctd17	1804.62	0.476703	0.134606	3.54147	0.000397906	0.00177187
Rbm33	3619.65	0.476677	0.141921	3.35875	0.000782955	0.00319108
Zfp568	962.537	0.476597	0.17401	2.7389	0.00616448	0.0188592
Fnbp1l	9266.07	0.476517	0.116521	4.08953	4.32245e-05	0.000245929
Tsc1	1948.06	0.476293	0.140679	3.38566	0.000710065	0.00293829
Cox19	888.822	0.476137	0.172054	2.76737	0.00565109	0.0175667
Etnk1	6260.05	0.476129	0.141914	3.35505	0.000793513	0.00322762
Zwint	2512.62	0.475912	0.13698	3.47431	0.000512164	0.00221816
Pcyt2	3922.51	0.475691	0.179647	2.64791	0.00809902	0.023808
Foxo3	1452.99	0.475491	0.149213	3.18666	0.00143924	0.0053894
Tmem131	4649.3	0.475261	0.128549	3.69712	0.000218059	0.00104029
Eif1a	9123.93	0.474832	0.12208	3.88951	0.000100446	0.000526227
Gch1	1974.36	0.47431	0.143981	3.29426	0.000986808	0.00390805
Sepn1	3379.28	0.474308	0.124275	3.81659	0.000135311	0.000684144
Atxn1l	2789.15	0.474306	0.132564	3.57795	0.000346304	0.00156383
Zfp513	1420.63	0.474206	0.152395	3.11168	0.00186023	0.0067338
Zfp217	2478.92	0.474205	0.144068	3.29153	0.000996457	0.00394114
Zyg11b	3202.65	0.473982	0.124785	3.79839	0.000145636	0.000729079
Kidins220	4913.89	0.473874	0.128339	3.69236	0.000222185	0.00105707
Spire1	2313.68	0.473286	0.135485	3.49326	0.000477154	0.00208153
Birc6	6908.04	0.473188	0.167836	2.81934	0.00481218	0.0153408
Fbxw11	5815.58	0.473186	0.121161	3.90544	9.40522e-05	0.000496149
Ift20	1186.23	0.473085	0.155407	3.04417	0.00233322	0.00815019
Gdap2	1638.04	0.472235	0.140406	3.36334	0.000770043	0.00315006
Trak2	3427.64	0.471969	0.138164	3.41601	0.000635462	0.00268713
Mob1b	1382.14	0.471916	0.144087	3.27522	0.00105579	0.00414215
Prr14	2186.25	0.471739	0.130303	3.62032	0.000294241	0.00135589
Dcp1a	2299.92	0.47142	0.140055	3.36597	0.000762761	0.00312132
Brd2	16963.3	0.471319	0.146284	3.22193	0.00127328	0.00485961
Pi4k2a	6302.46	0.471147	0.115971	4.06262	4.8524e-05	0.000273777
Klf3	554.468	0.47097	0.201023	2.34287	0.019136	0.0491215
St7l	2594.35	0.470923	0.126373	3.72645	0.000194197	0.00094121
Sar1a	6996.05	0.470861	0.115293	4.08405	4.42578e-05	0.000251338
Sos2	3522.99	0.470842	0.127205	3.70145	0.000214375	0.00102432
Ankhd1	6238.6	0.470322	0.135382	3.47404	0.000512676	0.00221959
Impdh1	3622.57	0.470317	0.145081	3.24176	0.00118796	0.00459111
Arhgef3	986.34	0.469756	0.195819	2.39893	0.016443	0.0432206
Ezh1	1795.6	0.467958	0.141313	3.3115	0.000927969	0.00370396
Tpd52	10248.9	0.46775	0.126525	3.69689	0.000218253	0.0010408
Elk3	3010.18	0.467419	0.12713	3.67669	0.000236279	0.00111584
Exoc6b	2132.92	0.467341	0.139622	3.34718	0.000816377	0.00331067
Csnk1g3	2822.55	0.467283	0.137605	3.39584	0.000684182	0.00284569
Kcnk13	2077.52	0.467238	0.130347	3.58456	0.000337641	0.00152811
Serinc1	9878.86	0.467184	0.124856	3.74177	0.000182728	0.000893449
Etv5	1348.17	0.467178	0.151535	3.08298	0.00204941	0.00730504
Pnpla8	2410.74	0.467176	0.129374	3.61105	0.000304958	0.00139815
Bahd1	2091.76	0.467112	0.142786	3.27142	0.00107008	0.00419011
Vmp1	5522.23	0.466941	0.12654	3.69006	0.000224199	0.00106624
Mef2d	5175.96	0.466796	0.13802	3.3821	0.000719349	0.00296762
Dcaf6	1518.55	0.46666	0.180482	2.58563	0.00972016	0.0277751
Gzf1	2550.64	0.46614	0.153679	3.0332	0.00241978	0.00841155
Me1	1082.84	0.465949	0.155401	2.99836	0.00271438	0.00930798
Elp5	2237.94	0.46594	0.136236	3.42009	0.000625997	0.00265264
Ap3s1	2471.7	0.465371	0.14618	3.18355	0.00145482	0.0054377
Mmd	1986.61	0.465008	0.140554	3.3084	0.000938307	0.00373721
Pgm2	2061.86	0.4645	0.137409	3.38043	0.000723732	0.00297964
Jak2	2120.23	0.464454	0.137515	3.37749	0.000731507	0.0030086
Mrps6	3469.81	0.464072	0.145603	3.18725	0.00143633	0.00538017
Galnt6	3219.23	0.463969	0.135786	3.4169	0.000633379	0.00267926
Sphk2	3194.68	0.463946	0.139783	3.31903	0.000903302	0.00362692
Lnx2	1195.55	0.463098	0.145003	3.19372	0.00140451	0.00528048
Nol4l	1121.44	0.462939	0.145279	3.18655	0.00143978	0.00538978
Ginm1	1235.06	0.462739	0.144001	3.21344	0.00131156	0.00498334
Itpkb	2560.12	0.4626	0.163555	2.8284	0.00467816	0.0149731
Dda1	2592.48	0.462066	0.129859	3.55822	0.000373373	0.00167365
Mfsd12	8911.21	0.461745	0.142232	3.24641	0.00116869	0.00452674
Zcchc6	3913.29	0.461722	0.122335	3.77425	0.000160489	0.000794287
Dnajc3	4464.63	0.460854	0.124929	3.68892	0.000225204	0.00107018
Rabgap1	3382.18	0.459953	0.128114	3.5902	0.00033043	0.00149826
Stim2	2877.01	0.459514	0.135496	3.39135	0.000695494	0.00288584
Tmcc1	813.414	0.459281	0.165094	2.78193	0.00540368	0.0169186
Rps6ka3	7989.47	0.459258	0.126063	3.64309	0.000269382	0.00125273
Spata2	1574.34	0.459001	0.138021	3.32559	0.000882321	0.0035544
Crebbp	1764.66	0.458625	0.169021	2.71342	0.00665932	0.0201251
Zfp408	699.719	0.458613	0.179633	2.55306	0.0106782	0.0300264
Wrnip1	1520.82	0.458127	0.139206	3.29101	0.000998269	0.00394574
Shoc2	2521.36	0.458058	0.13545	3.38176	0.000720225	0.00297023
Lrch3	2496.49	0.45794	0.137736	3.32477	0.000884918	0.00356251
Stoml1	586.963	0.457759	0.174248	2.62705	0.00861291	0.0250524
Zc3h11a	6662.89	0.457697	0.148067	3.09116	0.00199377	0.00713863
Zfp800	1513.48	0.457503	0.14751	3.1015	0.00192543	0.00691838
Cnot4	1789.34	0.457453	0.145201	3.15047	0.00163006	0.00599511
Zfc3h1	4610.44	0.456762	0.158338	2.88473	0.00391751	0.0128542
Atxn2l	9857.03	0.456464	0.143618	3.17831	0.00148134	0.00552666
Mga	3374.95	0.456299	0.151095	3.01995	0.00252819	0.008731
Tmem30a	11363.3	0.455845	0.112525	4.05106	5.09858e-05	0.000285943
Ankib1	2606.63	0.455393	0.129785	3.50882	0.000450099	0.00197466
Sema4a	11950.8	0.455194	0.167891	2.71124	0.0067032	0.0202376
Thap7	1720.54	0.454912	0.157107	2.89556	0.00378483	0.0124625
Peak1	5502.56	0.454791	0.146578	3.10273	0.00191746	0.00689786
Txlng	691.061	0.454683	0.165824	2.74195	0.0061075	0.0187178
Mesdc1	1721.75	0.454407	0.142328	3.19268	0.00140961	0.00529636
Scyl2	2538.4	0.454041	0.129543	3.50495	0.000456696	0.00200072
Zkscan14	453.365	0.453544	0.191243	2.37156	0.0177132	0.0459244
Smg8	1855.2	0.452585	0.136483	3.31607	0.000912939	0.00365596
Nfkb2	4531.81	0.452488	0.123508	3.66363	0.000248669	0.00116665
1700025G04Rik	3740.85	0.452407	0.146916	3.07936	0.00207449	0.00738203
Aim2	3506.75	0.452187	0.121148	3.7325	0.000189587	0.000922911
Fmn1	3343.06	0.452179	0.141281	3.20056	0.00137163	0.00518246
Ankrd52	4190.24	0.451961	0.157813	2.8639	0.00418457	0.0135912
Csnk1e	3314.99	0.451951	0.123354	3.66385	0.000248454	0.00116665
Sdf2	2193.88	0.45113	0.142408	3.16787	0.00153558	0.0056993
Gxylt1	1729.41	0.451121	0.144905	3.11322	0.00185059	0.00670286
Zdhhc9	2149.6	0.450754	0.133896	3.36644	0.000761439	0.00311801
Tmem2	833.532	0.450609	0.158898	2.83584	0.00457051	0.0146699
Clasp1	2546.58	0.450494	0.136691	3.29572	0.000981701	0.00389036
Foxj3	3695.94	0.450361	0.134346	3.35225	0.000801566	0.00325711
Erich1	713.095	0.450095	0.16303	2.76081	0.00576588	0.0178506
Cxcl16	9069.02	0.449913	0.142423	3.159	0.00158311	0.00584718
Dnpep	1944.88	0.449513	0.136221	3.29989	0.000967231	0.00383883
Mast3	4865.24	0.449121	0.120508	3.7269	0.000193852	0.000940288
B4galt7	1940.71	0.448799	0.148408	3.02408	0.0024939	0.00863711
Setd1a	4329.56	0.448429	0.150662	2.97638	0.00291672	0.00993186
Sptbn1	2976.94	0.448261	0.137753	3.2541	0.00113751	0.00442144
Pgd	21528.8	0.448168	0.134876	3.32281	0.000891153	0.00358598
Klhdc3	3982.27	0.447723	0.122208	3.66363	0.000248667	0.00116665
Stk17b	3317.44	0.447113	0.13258	3.3724	0.000745158	0.00305854
Fam160b2	1068.01	0.447043	0.150754	2.96538	0.00302307	0.0102481
Zmym5	1300.5	0.446584	0.150606	2.96524	0.0030245	0.0102501
Ccnl1	3510.57	0.445332	0.137101	3.2482	0.00116136	0.00450405
Usp47	3602.92	0.445187	0.132847	3.35114	0.000804808	0.0032692
Atxn3	3809.59	0.444788	0.123438	3.60332	0.000314175	0.00143471
Herc1	4233.8	0.444743	0.173209	2.56766	0.0102386	0.0290047
Akap13	4340.01	0.444511	0.146062	3.04331	0.0023399	0.0081712
Nlk	1590.88	0.4445	0.141927	3.13188	0.00173692	0.00634403
Snx14	2529.7	0.444071	0.132343	3.35544	0.000792379	0.00322409
Ptprc	17892.7	0.444032	0.121704	3.64846	0.00026382	0.00123015
Peg13	816.753	0.443325	0.181448	2.44326	0.0145553	0.0390517
Abtb1	627.629	0.442259	0.173847	2.54396	0.0109604	0.0307132
Zxdc	1228.74	0.441452	0.15084	2.92663	0.00342652	0.0114186
Nav2	3672.22	0.44143	0.158108	2.79195	0.00523916	0.0164799
Dync1h1	12511.9	0.441274	0.137054	3.21971	0.00128322	0.00488941
Fam120b	1795.19	0.44097	0.137343	3.21072	0.00132403	0.00502446
Abhd17b	1678.24	0.440725	0.138659	3.17848	0.00148047	0.0055251
Degs1	7411.42	0.44052	0.118985	3.70232	0.000213639	0.00102121
Lrp6	3620.92	0.440354	0.141393	3.11441	0.00184316	0.00667994
Inpp5a	645.767	0.43994	0.182233	2.41417	0.0157713	0.0417889
Camsap1	1457.2	0.439833	0.150322	2.92594	0.00343417	0.0114347
Bnip3l	5000.87	0.43975	0.141124	3.11604	0.00183297	0.00664501
Abcf3	2480.53	0.439441	0.137143	3.20425	0.00135413	0.0051227
Pex5	2375.97	0.439242	0.129862	3.38238	0.000718597	0.00296688
Ptpn9	3677.3	0.439068	0.124759	3.51932	0.000432649	0.00190842
Atp6v0a2	3943.84	0.438635	0.125326	3.49994	0.000465357	0.00203476
Ikbip	808.969	0.437658	0.16012	2.73332	0.00627002	0.019134
Tnrc6b	2252.65	0.43722	0.142806	3.06163	0.00220133	0.00775403
Zfpl1	1042.87	0.437119	0.154936	2.82128	0.00478319	0.0152586
Plekha8	1146.3	0.437075	0.148352	2.9462	0.00321706	0.0108124
Lrrfip1	6580.14	0.437037	0.14253	3.06628	0.00216739	0.00766487
Cic	10677.4	0.436966	0.125956	3.4692	0.000522012	0.00225511
Gpatch2l	2037.56	0.436558	0.130381	3.34832	0.000813037	0.00329932
Akirin1	4320.25	0.436478	0.122721	3.55668	0.000375569	0.00168287
Pafah1b2	7640.06	0.436369	0.123369	3.5371	0.000404541	0.00179944
4931406P16Rik	2349.74	0.435556	0.133477	3.26315	0.00110181	0.00429775
Vhl	1376.55	0.435514	0.156345	2.78559	0.00534299	0.0167675
Psmd8	14349.1	0.43523	0.122868	3.54225	0.000396736	0.00176795
Ppap2c	2048.48	0.435144	0.150092	2.89917	0.0037415	0.0123365
Pdia6	12756.9	0.43435	0.119733	3.62765	0.000286016	0.00132049
Arhgef11	4328.17	0.433471	0.119094	3.63974	0.000272909	0.00126622
Esco1	2246.61	0.432913	0.138897	3.11679	0.00182835	0.00663021
Ntmt1	967.31	0.432229	0.169025	2.55719	0.0105521	0.0297473
Ints12	2189.24	0.432217	0.141967	3.04448	0.0023308	0.00814409
Elf4	2123.14	0.4321	0.150193	2.87697	0.00401515	0.013118
Ppm1b	3019.66	0.431859	0.126748	3.40723	0.000656252	0.002754
Mkrn1	6206.4	0.431467	0.126435	3.41257	0.000643543	0.00271483
Slc16a13	783.536	0.431336	0.164663	2.61952	0.00880545	0.0255452
Rnf6	3465.33	0.431295	0.130155	3.3137	0.00092069	0.00368094
Mia3	4295.56	0.430987	0.133266	3.23404	0.00122051	0.00469309
Zfp319	792.935	0.430986	0.161991	2.66055	0.00780132	0.023033
Tmtc3	2559.19	0.430978	0.15229	2.82998	0.00465506	0.0149124
Acot7	5159.77	0.430895	0.134291	3.20868	0.00133348	0.00505401
Myo1c	12531.2	0.430723	0.133375	3.2294	0.0012405	0.00475643
Nptn	15143.7	0.430687	0.111599	3.85924	0.00011374	0.000586808
Epn2	590.448	0.43048	0.182547	2.35818	0.0183647	0.0473914
Slc9a4	2289.35	0.430414	0.136481	3.15366	0.00161235	0.00594073
[truncated: 2,754 more rows]
