# Supplementary material for: Statin-mediated reduction in mitochondrial cholesterol primes an anti-inflammatory response in macrophages by upregulating Jmjd3
Source: eLife. 2024 Apr 11;13:e85964. doi: 10.7554/eLife.85964 (PMC11186637; doi:10.7554/eLife.85964)
Supplement: Supplementary file 2. [file elife-85964-supp2.xlsx]

## Sheet: S 1b - MCD regulated genes
Table S1a Genes regulated by MCD
Row.names	baseMean	log2FoldChange	lfcSE	stat	pvalue	padj
Il1b	128.098	4.11597	0.368732	11.1625	6.22293e-29	1.71162e-26
Cxcl2	10179.5	3.96246	0.0625455	63.3533	0	0
Egr1	21721.4	3.36591	0.141351	23.8124	2.48575e-125	2.10371e-122
Tnf	18191.9	3.30639	0.116712	28.3295	1.49772e-176	2.05974e-173
Nfkbiz	7317.77	3.25991	0.0598609	54.4581	0	0
Arc	1251.74	3.02167	0.263707	11.4584	2.13347e-30	6.17695e-28
Ier3	8067.49	2.89709	0.109908	26.3592	4.02368e-153	4.42686e-150
Zfp36	14542.6	2.85326	0.10667	26.7485	1.28679e-157	1.57303e-154
Lif	59.9132	2.74821	0.430947	6.37713	1.80439e-10	2.18152e-08
Dusp2	1290.54	2.62783	0.108805	24.1518	7.14134e-129	6.54742e-126
Tnfaip3	4003.25	2.58593	0.0724004	35.7171	2.14708e-279	7.87405e-276
Egr2	2070.68	2.32627	0.162806	14.2886	2.57864e-46	9.45672e-44
Ier2	5065.04	2.03466	0.0588071	34.5988	2.63041e-262	7.23495e-259
Dusp1	1325.12	1.9776	0.0892065	22.1688	6.87761e-109	4.45103e-106
Junb	14297.7	1.95036	0.107188	18.1956	5.58906e-74	2.79504e-71
Btg2	5377.68	1.92139	0.0630184	30.4894	3.60667e-204	7.93613e-201
Pde4b	1454.05	1.92035	0.0972377	19.749	8.18149e-87	4.50064e-84
Dusp5	358.597	1.91819	0.178579	10.7414	6.50352e-27	1.74516e-24
Maff	528.688	1.89131	0.141396	13.376	8.35685e-41	2.70418e-38
Ppp1r15a	2520.44	1.87828	0.0803218	23.3844	6.16067e-121	4.8414e-118
Ptgs2	3937.89	1.77561	0.0586152	30.2926	1.43506e-201	2.63142e-198
Phlda1	720.776	1.77506	0.239482	7.41208	1.24333e-13	1.89988e-11
Nfkbid	2807.14	1.67356	0.0747381	22.3923	4.67851e-111	3.21706e-108
Fos	3245.34	1.62925	0.0632161	25.7727	1.79402e-146	1.79435e-143
Nfkbia	13348.4	1.59506	0.0534281	29.8544	7.68963e-196	1.20859e-192
Nr4a1	738.58	1.58057	0.11612	13.6116	3.4175e-42	1.17498e-39
Socs3	1348.03	1.57187	0.09179	17.1246	9.71991e-66	4.11302e-63
Gdf15	56.0317	1.55545	0.384151	4.04905	5.1425e-05	0.00317852
Pim1	2509.86	1.54765	0.0701068	22.0756	5.42611e-108	3.31656e-105
Zc3h12a	2042.71	1.52425	0.0749861	20.3272	7.39709e-92	4.28331e-89
Egr3	2728.87	1.49416	0.163207	9.15501	5.43548e-20	1.12832e-17
Osm	446.343	1.43041	0.14614	9.78795	1.26846e-22	3.10124e-20
1810011O10Rik	63.6061	1.35756	0.366318	3.70595	0.000210603	0.0105177
Myc	210.064	1.3319	0.206395	6.45316	1.09541e-10	1.35412e-08
Gpr84	3233.47	1.31007	0.14867	8.8119	1.23037e-18	2.41724e-16
Traf1	2246.71	1.30685	0.086087	15.1805	4.759e-52	1.80547e-49
Cxcl10	419.601	1.28467	0.160064	8.02599	1.00713e-15	1.7588e-13
Hmgcs1	7145.46	1.27976	0.258492	4.95086	7.38881e-07	6.25321e-05
Errfi1	1169.62	1.25406	0.0965714	12.9858	1.47287e-38	4.62987e-36
H2-K2	385.468	1.25141	0.147017	8.51204	1.70901e-17	3.24181e-15
Ccrl2	315.092	1.21407	0.164169	7.39524	1.41157e-13	2.12741e-11
Plk3	804.142	1.16077	0.11006	10.5466	5.26522e-26	1.34716e-23
Irg1	791.195	1.122	0.124489	9.01284	2.00796e-19	4.09104e-17
Ccl4	5171.19	1.11711	0.0614404	18.182	7.16649e-74	3.42807e-71
Nlrp3	5407.39	1.10648	0.0605083	18.2864	1.06162e-74	5.56188e-72
Kdm6b	3373.81	1.09258	0.0645084	16.9371	2.39734e-64	9.76873e-62
Fosl1	205.636	1.08257	0.213024	5.0819	3.73686e-07	3.31556e-05
Cdc42ep2	169.183	1.0614	0.219332	4.83924	1.30339e-06	0.00010544
Insig1	8763.78	1.03282	0.155977	6.62165	3.55217e-11	4.49206e-09
Ccl3	18349	1.01891	0.0442791	23.0111	3.60868e-117	2.64685e-114
Marcksl1	7300.08	1.00814	0.175456	5.74582	9.14765e-09	9.67716e-07
Dusp8	433.943	0.955126	0.141464	6.75174	1.46086e-11	1.93643e-09
Plk2	7144.47	0.900291	0.0510741	17.6271	1.5248e-69	6.98993e-67
Icam1	3852.52	0.887886	0.0637069	13.9371	3.77207e-44	1.33872e-41
Id3	544.796	0.869951	0.128369	6.77693	1.22755e-11	1.66734e-09
Tnfsf9	3434.72	0.867971	0.064682	13.4191	4.67663e-41	1.55916e-38
Map3k8	866.668	0.856047	0.0993436	8.61704	6.87095e-18	1.32621e-15
Serpine1	402.386	0.846707	0.157033	5.39191	6.97108e-08	6.6692e-06
Rasgef1b	10005.1	0.829822	0.0471756	17.5901	2.93532e-69	1.29177e-66
Fosb	760.116	0.772464	0.112079	6.89216	5.49506e-12	7.65274e-10
Ccl2	600.904	0.759048	0.1213	6.25762	3.90889e-10	4.67452e-08
Csrnp1	1539.18	0.752707	0.0792449	9.4985	2.12945e-21	4.59376e-19
Plaur	1192.92	0.722888	0.110727	6.52854	6.64127e-11	8.3031e-09
Nos2	211.173	0.693646	0.193303	3.58838	0.000332739	0.0153171
Trib1	1063.85	0.690943	0.214058	3.22783	0.00124735	0.0445562
Sowahc	2145.97	0.682518	0.0712975	9.57282	1.04031e-21	2.38447e-19
Irf1	1232.82	0.672409	0.0888116	7.57118	3.6984e-14	5.81283e-12
Notch1	413.128	0.665323	0.141585	4.69912	2.61287e-06	0.000201026
Skil	2715.28	0.663526	0.0643849	10.3056	6.64718e-25	1.6621e-22
Zc3h12c	2723.18	0.652107	0.0683759	9.5371	1.46886e-21	3.23208e-19
Tmcc2	520.245	0.650389	0.126501	5.14136	2.72762e-07	2.52179e-05
Hmgcr	9489.98	0.637106	0.131809	4.83357	1.34108e-06	0.000107698
Eno2	1002.83	0.627063	0.102861	6.09624	1.08593e-09	1.271e-07
Pim3	2198.42	0.623012	0.0746913	8.34116	7.35667e-17	1.34897e-14
Hsd17b7	1633.89	0.619642	0.0934118	6.63344	3.27952e-11	4.1955e-09
Ldlr	8548.84	0.614922	0.155565	3.95284	7.72285e-05	0.00451951
Tlr2	17124.4	0.610744	0.0394939	15.4643	6.04695e-54	2.37602e-51
Il10ra	1637.55	0.601884	0.0767709	7.84	4.50559e-15	7.51069e-13
Zfp36l1	3697.83	0.5812	0.0597156	9.73279	2.18509e-22	5.11496e-20
Clec4e	7286.97	0.581129	0.0549033	10.5846	3.51368e-26	9.20416e-24
Slc20a1	6791.33	0.5804	0.0593647	9.77686	1.41532e-22	3.38508e-20
Sertad1	940.546	0.575336	0.0969786	5.93261	2.98163e-09	3.34733e-07
Bcl3	451.357	0.574503	0.145988	3.93527	8.31048e-05	0.0047374
Cflar	6734.01	0.571308	0.0507753	11.2517	2.27202e-29	6.40942e-27
Arl2bp	929.051	0.558615	0.0978392	5.70952	1.13294e-08	1.18711e-06
Ubc	1973.27	0.555471	0.0716773	7.7496	9.21801e-15	1.51368e-12
Birc3	3393.76	0.55327	0.0625909	8.83948	9.61691e-19	1.92373e-16
Tagap	879.728	0.545068	0.101008	5.39629	6.80327e-08	6.56575e-06
Vegfa	2429.41	0.542462	0.157463	3.44502	0.000571023	0.0234028
Ccnl1	4187.17	0.538667	0.0567677	9.48897	2.33318e-21	4.93647e-19
Slc25a25	2023.7	0.536921	0.0702264	7.64558	2.08008e-14	3.31668e-12
Pdxp	448.055	0.526675	0.135068	3.89934	9.64559e-05	0.00538684
Mcl1	37724.7	0.510164	0.0393805	12.9547	2.20883e-38	6.75044e-36
Klf2	1378.63	0.503151	0.0864767	5.81834	5.94357e-09	6.47437e-07
Itga5	3103.51	0.496431	0.0675681	7.34712	2.02525e-13	2.9709e-11
Dusp4	3638.84	0.48867	0.0637204	7.66897	1.73387e-14	2.80529e-12
Cd83	5973.71	0.477323	0.0500385	9.53911	1.4407e-21	3.23208e-19
Selenbp1	1756.26	0.475784	0.0760796	6.25376	4.00674e-10	4.74002e-08
Rusc2	3412.47	0.472504	0.0739651	6.3882	1.67847e-10	2.05184e-08
Tgif2	461.184	0.468172	0.147015	3.18451	0.00144999	0.0498777
Relb	1490.7	0.465603	0.0892535	5.21664	1.82201e-07	1.69879e-05
Pnrc1	5495.71	0.460001	0.0562315	8.18049	2.82699e-16	5.09878e-14
Zfp429	430.892	0.458202	0.13614	3.36568	0.000763562	0.0296845
Rnf19b	3991.19	0.445575	0.060272	7.39273	1.43843e-13	2.13859e-11
Fosl2	3373.34	0.435317	0.0737752	5.90059	3.62213e-09	4.02533e-07
Nfkb2	3160.69	0.434231	0.064591	6.72278	1.7829e-11	2.33517e-09
Ptger4	1831.6	0.433809	0.0761351	5.69788	1.21309e-08	1.2591e-06
Pmaip1	7010.61	0.432328	0.0551213	7.84321	4.39185e-15	7.43372e-13
Sdc4	14678.4	0.430978	0.0528579	8.15352	3.53496e-16	6.27285e-14
Elmsan1	4950.05	0.421834	0.0534858	7.88685	3.09908e-15	5.3275e-13
Plagl2	2788.93	0.414092	0.0610963	6.77769	1.22109e-11	1.66734e-09
Slfn2	6066.25	0.413375	0.0550285	7.51201	5.82281e-14	9.0229e-12
Gltscr1	1007.8	0.411368	0.102309	4.02083	5.79933e-05	0.0035251
Polk	978.786	0.393812	0.093449	4.2142	2.5067e-05	0.00162432
Tnip3	4471.03	0.392902	0.0681989	5.76111	8.35602e-09	8.92553e-07
Ralgds	4784.69	0.386444	0.0643866	6.00194	1.94979e-09	2.23455e-07
Slc37a1	1047.43	0.384942	0.0906254	4.24762	2.16055e-05	0.00144751
Nfkbie	740.862	0.38414	0.106337	3.61248	0.000303286	0.0141989
Pvr	1220.97	0.382088	0.0877751	4.35303	1.34266e-05	0.000934934
Irak2	3320.5	0.380657	0.0690938	5.50929	3.60293e-08	3.50792e-06
Filip1l	1220.22	0.380385	0.0918715	4.1404	3.46703e-05	0.00216728
Zfp516	1678.52	0.379334	0.0760963	4.98492	6.19882e-07	5.41265e-05
Jun	8012.08	0.379194	0.0447613	8.47148	2.42287e-17	4.51804e-15
Taf7	594.963	0.372119	0.116322	3.19904	0.00137887	0.0480072
Rel	1753.56	0.370091	0.074327	4.97923	6.3839e-07	5.51294e-05
Cdc42ep4	1918.64	0.361241	0.0733483	4.925	8.43604e-07	7.03131e-05
Cdkn1a	9274.72	0.360531	0.0493567	7.30462	2.78061e-13	4.02529e-11
Enpp4	695.64	0.356127	0.108681	3.27681	0.00104987	0.0388082
Adrb2	1725.41	0.351877	0.0770857	4.56475	5.00089e-06	0.000374284
Cbx4	846.782	0.347774	0.100844	3.44864	0.000563411	0.0232341
Idi1	1734.18	0.342601	0.0804978	4.25602	2.08094e-05	0.00140457
Lpin1	1510.98	0.341267	0.0781316	4.36785	1.25478e-05	0.000879303
Mier2	1227.49	0.335368	0.086101	3.89505	9.8179e-05	0.00545538
Rreb1	3362.82	0.335182	0.0657453	5.09819	3.42914e-07	3.06727e-05
Zfp703	903.274	0.331954	0.0974034	3.40803	0.00065434	0.0260279
Cdr2	986.727	0.330831	0.098376	3.36292	0.000771213	0.0298764
Dnajb9	1095.26	0.330671	0.0941168	3.51341	0.000442389	0.0194687
Nab2	3063.84	0.330226	0.0642597	5.13893	2.76313e-07	2.53333e-05
Lilr4b	4169.6	0.329954	0.0550199	5.997	2.00999e-09	2.27979e-07
Suco	2227.68	0.328304	0.0683541	4.80299	1.56313e-06	0.00012462
Arl5b	990.811	0.325434	0.0958082	3.39672	0.00068199	0.0268934
Tsc22d2	1775.41	0.322508	0.0775536	4.15852	3.20311e-05	0.00201375
Ets2	13411.5	0.317702	0.0545688	5.82205	5.81287e-09	6.39532e-07
Zc3h10	1453.58	0.317679	0.0792611	4.00802	6.12312e-05	0.00370146
Cited2	37876.8	0.316912	0.0469142	6.75514	1.42699e-11	1.9146e-09
C5ar1	4694.18	0.316769	0.0547588	5.7848	7.25977e-09	7.83058e-07
Asb1	1118.13	0.314444	0.0973775	3.22912	0.00124172	0.0444997
Zswim4	1468.22	0.312682	0.07954	3.93112	8.45495e-05	0.00479492
Spty2d1	2644.16	0.311175	0.0625061	4.97832	6.41389e-07	5.51294e-05
Cramp1l	1649.97	0.310787	0.0778159	3.99388	6.50019e-05	0.00390793
Slc41a1	931.725	0.31021	0.0948992	3.26884	0.00107989	0.0397355
Nt5dc3	2123.94	0.308291	0.072008	4.28135	1.85763e-05	0.00126158
Rbm47	2486.46	0.300238	0.0635097	4.72744	2.27372e-06	0.000177024
Dusp6	1239.43	0.299904	0.0875337	3.42615	0.000612198	0.0247625
Gfod1	2995.12	0.299225	0.0681136	4.39303	1.11783e-05	0.000788353
Zfp280b	1483.96	0.296487	0.0804379	3.68591	0.00022789	0.0112433
Cdk17	1960.13	0.295998	0.0700228	4.22716	2.36659e-05	0.00154984
Dnajb1	2279.65	0.294297	0.0698394	4.21391	2.50986e-05	0.00162432
Bcl10	3517.13	0.294231	0.0593833	4.95478	7.24137e-07	6.17594e-05
Fasn	14979.7	0.29358	0.0485207	6.05061	1.44295e-09	1.67108e-07
Cdc25a	1851.96	0.293344	0.085164	3.44446	0.0005722	0.0234028
Mdm2	6329.36	0.293219	0.0519056	5.64908	1.61313e-08	1.65866e-06
Gse1	2402.65	0.292538	0.064609	4.52781	5.95969e-06	0.000440057
Frmd4a	1235.09	0.29151	0.0839433	3.4727	0.000515256	0.0218345
Polr3d	1609.9	0.290891	0.0811334	3.58533	0.000336646	0.0154324
Msmo1	6061.19	0.289375	0.0628681	4.6029	4.16653e-06	0.000318334
Rnf145	2780.33	0.288596	0.060779	4.74829	2.05146e-06	0.000161216
Pramef8	1520.25	0.287747	0.0772666	3.72408	0.000196028	0.0098931
Sc5d	2237.84	0.286588	0.0745253	3.84552	0.000120298	0.00645621
Tigar	2073.53	0.283016	0.067956	4.16469	3.11775e-05	0.00197135
Nfatc2	2418.2	0.281442	0.0651965	4.31683	1.58288e-05	0.00109388
Rab11fip1	1383.59	0.280707	0.0809633	3.46709	0.000526119	0.022093
C2cd2l	2012.29	0.275087	0.069056	3.98353	6.78989e-05	0.00401626
Pank3	7867.43	0.274189	0.0537144	5.10458	3.31529e-07	2.98974e-05
Arid4a	2075.72	0.271677	0.0750991	3.61758	0.000297373	0.0139816
Rhob	1911.75	0.271278	0.0777447	3.48935	0.000484204	0.0210211
D17H6S56E-5	13709.5	0.27057	0.0529742	5.10758	3.26313e-07	2.96702e-05
Cxcl16	3727.78	0.268507	0.0553001	4.85546	1.20109e-06	9.78848e-05
Stambpl1	2075.87	0.267188	0.0732063	3.6498	0.00026245	0.0125542
Tgif1	2690.8	0.266561	0.0627879	4.24543	2.18177e-05	0.00144751
Bcl6	3611.77	0.26607	0.0626754	4.2452	2.18402e-05	0.00144751
Spata13	2762.17	0.26579	0.0687112	3.86822	0.000109631	0.00597111
Chsy1	1637.75	0.265778	0.0761816	3.48874	0.000485309	0.0210211
Sde2	3334.16	0.264993	0.0587409	4.51122	6.44571e-06	0.00047186
Cyp51	4664.48	0.264027	0.0596854	4.42365	9.70464e-06	0.000688841
Peli1	1731.24	0.262032	0.0741289	3.53482	0.000408047	0.0183238
Soga1	2050.79	0.260185	0.071782	3.62466	0.000289339	0.0136623
Rc3h1	5426.35	0.256414	0.0527896	4.85728	1.19012e-06	9.77144e-05
Plekha3	2804	0.256327	0.0610868	4.19611	2.71544e-05	0.00173693
Klf6	14787	0.255741	0.0541085	4.72645	2.28481e-06	0.000177024
Per1	2410.59	0.254346	0.0645886	3.93794	8.21833e-05	0.00470928
Pcgf3	1785.68	0.25331	0.0735697	3.44313	0.000575027	0.0234313
Lilrb4a	13696.3	0.252808	0.0451246	5.60245	2.11348e-08	2.11386e-06
Troap	1798.71	0.252599	0.0724838	3.4849	0.000492314	0.021158
Etv3	5558.77	0.251644	0.055571	4.52832	5.94534e-06	0.000440057
Prr12	1759.62	0.250155	0.0748376	3.34264	0.000829854	0.0318111
Wsb1	9717.99	0.246357	0.0459128	5.36577	8.0605e-08	7.64496e-06
Jund	5863.66	0.245362	0.0544015	4.51022	6.47618e-06	0.00047186
Cebpb	6359.26	0.245217	0.0533534	4.59609	4.30495e-06	0.000326642
Camta2	2195.14	0.244746	0.0666976	3.66949	0.000243035	0.0118839
3110043O21Rik	2425.78	0.24346	0.0701154	3.47227	0.000516076	0.0218345
Gbe1	1888.01	0.242668	0.0703706	3.44843	0.000563853	0.0232341
Shb	1951.43	0.242486	0.0756811	3.20406	0.00135506	0.0475834
Zfp36l2	11494.9	0.241498	0.0432162	5.58814	2.29516e-08	2.27489e-06
Ticrr	2466.27	0.241341	0.0647781	3.72566	0.000194807	0.00987682
Ifrd1	6857.35	0.240454	0.0487603	4.93136	8.16611e-07	6.85829e-05
Tnrc18	4582.51	0.23939	0.0554692	4.31572	1.59081e-05	0.00109388
Arhgef2	10146.2	0.238808	0.0425319	5.61479	1.96806e-08	1.98648e-06
Mafk	2830.2	0.238753	0.0621216	3.84333	0.000121378	0.00648253
Sod2	4900.93	0.236641	0.0563659	4.19829	2.68937e-05	0.00173032
Cep85	1776.15	0.235633	0.0725167	3.24937	0.00115662	0.0419973
Lss	3636.04	0.233456	0.0577664	4.04138	5.31377e-05	0.0032479
Zbtb21	2247.03	0.232703	0.0659484	3.52856	0.000417826	0.018611
Midn	2442.03	0.231722	0.0721395	3.21214	0.00131748	0.0464582
Rcsd1	3260.63	0.228938	0.0590756	3.87535	0.000106472	0.00585393
4930402H24Rik	2761.43	0.228335	0.0612275	3.72928	0.000192025	0.00982354
Traf3	3222.64	0.227263	0.0588006	3.86498	0.000111098	0.00602118
Tiparp	3355.02	0.22652	0.0573527	3.9496	7.82822e-05	0.00453295
Yrdc	2790.07	0.225472	0.0661232	3.40988	0.000649925	0.0260279
Ero1l	12988.1	0.225036	0.0446643	5.03838	4.69495e-07	4.13231e-05
Zfp710	7225.95	0.224943	0.0460684	4.8828	1.0459e-06	8.6519e-05
Sqstm1	37741.9	0.224762	0.0402978	5.57753	2.43962e-08	2.39649e-06
Ifngr2	4634.28	0.224751	0.0563415	3.98908	6.63299e-05	0.0039661
Cep170	5708.46	0.223616	0.0561098	3.98532	6.73895e-05	0.00400767
Ell2	3418.8	0.22342	0.0654793	3.41207	0.000644717	0.0259823
Rrs1	5521.35	0.222456	0.0524657	4.24002	2.23495e-05	0.00147239
Itpkb	2453.19	0.22195	0.0661055	3.35752	0.000786461	0.0303602
Stard4	2708.83	0.221474	0.0637088	3.47635	0.00050829	0.0216752
Susd6	4699.23	0.220915	0.0557732	3.96095	7.4652e-05	0.00439209
Baz2a	2952.11	0.220683	0.0604553	3.65035	0.000261879	0.0125542
Fxr2	4007.72	0.217589	0.0551647	3.94435	8.00171e-05	0.00460915
Sqle	5424.05	0.217104	0.0629225	3.45034	0.000559889	0.0232341
Med13l	3333.3	0.21334	0.0592663	3.59968	0.000318612	0.0147284
Kdm7a	3622.19	0.213133	0.0570214	3.73778	0.000185653	0.00954467
Atf4	14339.3	0.212258	0.0404339	5.2495	1.5251e-07	1.43411e-05
Hmox1	4595.63	0.211172	0.0575881	3.66694	0.000245475	0.0119501
Slc2a1	8232.15	0.209711	0.0465587	4.50423	6.66127e-06	0.000482153
Kif21b	6837.11	0.209429	0.057157	3.6641	0.000248211	0.01203
Brpf1	4206.21	0.208444	0.0527536	3.95128	7.77341e-05	0.00452503
Adnp2	3435.72	0.206914	0.0569656	3.63226	0.000280954	0.0133235
Brd1	3664.91	0.205519	0.0561628	3.65933	0.000252873	0.0122022
Zmym2	2702.33	0.204399	0.0635457	3.21656	0.00129737	0.0459547
Sdc3	3422.2	0.202363	0.0570178	3.54912	0.000386523	0.0175724
Sash1	3613.66	0.201471	0.0566153	3.55859	0.000372846	0.0170209
Mef2d	4941.38	0.2011	0.0531634	3.78267	0.000155154	0.00813082
Rela	4387.13	0.199422	0.0522863	3.81405	0.00013671	0.00726612
Nrros	9044.06	0.198285	0.0440836	4.49794	6.86151e-06	0.000493401
Secisbp2l	3775.11	0.198124	0.0560954	3.53191	0.000412572	0.0184517
N4bp1	3665.68	0.197154	0.0569502	3.46187	0.000536434	0.0224405
Bicd2	4678.41	0.197126	0.0518555	3.80145	0.00014385	0.00760886
Kbtbd2	3410.4	0.195317	0.0586082	3.3326	0.000860395	0.0326416
Tnfaip2	9942.18	0.19473	0.0451821	4.3099	1.63329e-05	0.00111611
Zfp367	3923.91	0.193815	0.0552938	3.50518	0.000456301	0.0200009
Tet3	4697.85	0.191805	0.0520659	3.68388	0.000229713	0.0112826
Atn1	3127.48	0.189494	0.0586072	3.23329	0.00122375	0.0440808
Ash1l	5590.31	0.187665	0.0496126	3.7826	0.000155196	0.00813082
Tnip1	4343.24	0.187239	0.0571466	3.27646	0.00105116	0.0388082
Gsn	11165.3	0.186449	0.0445099	4.18893	2.80277e-05	0.00178243
Arid1a	8856.04	0.18369	0.0470065	3.90775	9.31611e-05	0.00522938
Mid1ip1	3540.8	0.183511	0.0564484	3.25095	0.00115022	0.041903
Ier5	5021.34	0.17997	0.0528139	3.40762	0.000655312	0.0260279
Chd1	5457.87	0.179378	0.0505782	3.54654	0.000390329	0.0176
Mast3	4666.43	0.178613	0.0511818	3.48978	0.000483424	0.0210211
Ezr	4487.01	0.174013	0.0538279	3.23276	0.00122603	0.0440808
Btg1	21764.6	0.170841	0.0384105	4.44777	8.67654e-06	0.000619866
Cenpe	6939.33	0.168092	0.0496597	3.38488	0.000712087	0.0278804
Ncor2	6416.73	0.16738	0.047177	3.54791	0.000388301	0.0175806
Atxn2l	13076.9	0.165776	0.0448395	3.69709	0.000218083	0.0108079
Tfe3	6464.69	0.162061	0.0494557	3.27688	0.00104961	0.0388082
Plekho2	16646.7	0.160199	0.0475337	3.37022	0.000751075	0.0293026
Lcp2	12735.9	0.148389	0.0446056	3.32669	0.000878835	0.0331556
Dock8	10117.6	0.14486	0.0433276	3.34338	0.000827659	0.0318111
Dgkd	16271.7	0.14446	0.0384866	3.75351	0.000174379	0.00904959
Actg1	32919.4	0.142846	0.0420263	3.39896	0.000676417	0.0267696
Cst3	49661.4	-0.108472	0.03405	-3.18567	0.00144421	0.0498777
Rps8	56419.3	-0.115376	0.0358735	-3.21619	0.00129903	0.0459547
Rpl9	45597.5	-0.123662	0.0388342	-3.18436	0.00145072	0.0498777
Rps7	32430.5	-0.127381	0.0365363	-3.48641	0.000489545	0.0211215
Rps12	34968	-0.129355	0.0366936	-3.52527	0.000423059	0.0187681
Rps21	17103.2	-0.12997	0.0399221	-3.25557	0.00113163	0.0413628
Rps15a	31497	-0.131732	0.0365338	-3.60577	0.000311225	0.0145089
Rpl12	45141.9	-0.133696	0.0367349	-3.63947	0.000273199	0.0130118
Rpl39	16067.9	-0.135912	0.0398804	-3.408	0.000654403	0.0260279
H2afz	21314.6	-0.138466	0.0416272	-3.32633	0.000879971	0.0331556
Cd63	13469.2	-0.142202	0.0409653	-3.47128	0.000517979	0.0218345
Creg1	9427.54	-0.14469	0.0433109	-3.34072	0.000835613	0.0318111
Gmfb	7962.64	-0.145652	0.0455494	-3.19766	0.00138547	0.0480851
Hint1	9614.8	-0.146827	0.0444914	-3.30012	0.000966435	0.0361657
Rps25	31845.5	-0.146864	0.0381113	-3.85355	0.000116418	0.0062786
Psma7	8620.37	-0.151937	0.0474529	-3.20185	0.00136547	0.0476917
Rpl35a	6410.64	-0.15372	0.047699	-3.22271	0.00126984	0.0452127
Kbtbd11	13243.1	-0.156767	0.0404637	-3.87426	0.000106948	0.00585393
Ndufa4	6459.9	-0.167441	0.0464756	-3.60276	0.000314851	0.014616
Cox7b	5481.77	-0.174274	0.053338	-3.26736	0.00108557	0.0398114
Cnih1	4943.08	-0.175248	0.0517326	-3.38758	0.000705131	0.0277066
Cr1l	4122.56	-0.176838	0.0531896	-3.32467	0.000885228	0.0332399
Atf5	4702.92	-0.177107	0.0513111	-3.45163	0.000557219	0.0232217
Pnrc2	5132.12	-0.196483	0.0565147	-3.47668	0.000507664	0.0216752
Ndufs4	2531.98	-0.204454	0.0629407	-3.24836	0.00116072	0.0420073
Mafb	3704.28	-0.209947	0.062827	-3.34167	0.000832761	0.0318111
Cd300lb	9876.96	-0.217318	0.0532994	-4.07731	4.55591e-05	0.00283187
Abcg1	12712.4	-0.224127	0.0489799	-4.5759	4.74179e-06	0.000357323
Rgs2	8547.89	-0.254708	0.0453335	-5.61854	1.92572e-08	1.96174e-06
AI467606	1404.37	-0.256432	0.0800495	-3.20342	0.00135804	0.0475834
Clec7a	2136.1	-0.256887	0.0692231	-3.71101	0.000206435	0.0103708
Fam84b	1968.97	-0.261361	0.0705401	-3.70514	0.000211273	0.0105177
1500012F01Rik	1649.07	-0.280545	0.079843	-3.51371	0.000441889	0.0194687
Txnip	17933.8	-0.309852	0.0424466	-7.2998	2.88206e-13	4.11797e-11
Bmf	1226.63	-0.333606	0.0894822	-3.72819	0.000192864	0.00982354
Slc30a1	1748.31	-0.348986	0.0726849	-4.80135	1.576e-06	0.000124742
Malat1	9422.42	-0.357982	0.108581	-3.29691	0.000977533	0.036457
Hgh1	1028.27	-0.360596	0.0926212	-3.89324	9.89146e-05	0.00546863
Lhfpl2	4983.31	-0.404254	0.0568083	-7.11611	1.11015e-12	1.56589e-10
Gpr146	811.609	-0.408605	0.108969	-3.74975	0.000177008	0.00914294
Hmga2-ps1	788.8	-0.423224	0.10457	-4.04729	5.18145e-05	0.00318471
Snhg20	423.437	-0.526767	0.139397	-3.77889	0.000157531	0.00821402
Cbx8	293.763	-0.564324	0.164321	-3.43429	0.000594112	0.0241196
Neat1	9816.48	-0.625032	0.049819	-12.5461	4.17787e-36	1.2423e-33
Mylip	797.091	-0.700525	0.104883	-6.67908	2.40441e-11	3.11215e-09
Lrrc14b	152.653	-0.925433	0.23651	-3.91288	9.12029e-05	0.00514571
