# Supplementary material for: Statin-mediated reduction in mitochondrial cholesterol primes an anti-inflammatory response in macrophages by upregulating Jmjd3
Source: eLife. 2024 Apr 11;13:e85964. doi: 10.7554/eLife.85964 (PMC11186637; doi:10.7554/eLife.85964)
Supplement: Supplementary file 3. [file elife-85964-supp3.xlsx]

## Sheet: peakAnno_
SYMBOL	seqnames	start	end	Fold	p.value
Ccl4	chr11	83665641	83666041	3.238	2.24826e-46
A330076C08Rik	chr13	44321136	44321536	2.92987	6.56869e-18
Phlda1	chr10	111510066	111510466	2.90934	1.5859e-22
Cadm1	chr9	47445332	47445732	2.85267	1.12709e-29
Nfkb1	chr3	135640189	135640589	2.76284	5.93243e-26
Pim1	chr17	29496452	29496852	2.57285	5.5611e-22
Syt7	chr19	10356807	10357207	2.56018	3.47697e-13
Gm9899	chr5	30591344	30591744	2.54814	1.27434e-15
Jarid2	chr13	44704020	44704420	2.54283	3.98696e-17
Kpna3	chr14	61447935	61448335	2.52043	3.88634e-22
Snord83b	chr15	80061131	80061531	2.50765	2.65163e-21
Fndc3a	chr14	72863030	72863430	2.48173	1.05544e-15
Uckl1	chr2	181563979	181564379	2.47176	2.94497e-11
Nmt2	chr2	3218278	3218678	2.45949	6.00112e-11
Cebpd	chr16	15984192	15984592	2.45267	8.63507e-16
Ttc21a	chr9	119969276	119969676	2.41279	2.44754e-20
Rel	chr11	23754268	23754668	2.39378	1.52292e-31
Nfkb1	chr3	135670493	135670893	2.3879	2.51604e-31
Mir155hg	chr16	84627068	84627468	2.38073	6.17771e-19
Cd83	chr13	43807085	43807485	2.36866	2.00285e-14
Otos	chr1	92712344	92712744	2.35609	8.64977e-15
Syt7	chr19	10417382	10417782	2.34325	5.72049e-13
Ptges	chr2	30913072	30913472	2.33519	4.99715e-15
Crtam	chr9	40993980	40994380	2.31831	8.69558e-17
Gm29684	chr10	95085717	95086117	2.31751	6.21358e-18
Matn4	chr2	164422620	164423020	2.30983	7.57564e-23
1700020M21Rik	chr9	120854647	120855047	2.29702	1.62887e-13
Rgs20	chr1	5015377	5015777	2.29319	2.49346e-13
Twist2	chr1	91691609	91692009	2.28257	1.32035e-12
Lrrc32	chr7	98542771	98543171	2.28231	2.54457e-25
Dot1l	chr10	80758688	80759088	2.27337	9.58794e-32
Bcl9	chr3	97243667	97244067	2.27323	9.43765e-12
Wsb1	chr11	79202500	79202900	2.26523	1.31274e-13
Ercc6	chr14	32496239	32496639	2.24395	1.17855e-11
Fars2	chr13	36214125	36214525	2.23957	1.58635e-16
Rbm20	chr19	53740725	53741125	2.23729	6.02146e-14
Gm29536	chr1	79144110	79144510	2.23004	8.92475e-11
4930459C07Rik	chr10	96348993	96349393	2.22567	1.32941e-21
Spp1	chr5	104441797	104442197	2.21907	2.97436e-21
Tcp11	chr17	28104423	28104823	2.21766	7.15107e-14
Atxn1	chr13	45884936	45885336	2.20998	5.17828e-17
Mir155	chr16	84717765	84718165	2.20256	1.10898e-10
Asb7	chr7	66576240	66576640	2.19843	7.04806e-09
Cadm4	chr7	24477654	24478054	2.18666	9.69201e-16
Basp1	chr15	25271979	25272379	2.18425	6.37213e-19
Dock10	chr1	80643999	80644399	2.17943	3.6773e-14
Slc7a11	chr3	50402419	50402819	2.17373	2.58806e-13
Bcl2l11	chr2	128226505	128226905	2.16888	3.74131e-11
2610024D14Rik	chr11	21102529	21102929	2.16	8.66798e-09
Xirp1	chr9	120004032	120004432	2.15697	1.80813e-15
Lif	chr11	4308580	4308980	2.15381	9.33955e-20
Src	chr2	157402784	157403184	2.14947	1.5727e-11
Nfkbiz	chr16	55830529	55830929	2.14795	5.32378e-15
Slfn10-ps	chr11	83043884	83044284	2.14363	2.65293e-17
Ccdc148	chr2	59042649	59043049	2.14027	5.56103e-21
Lilrb4a	chr10	51416654	51417054	2.13653	1.05568e-15
Traf1	chr2	34939804	34940204	2.13643	1.48322e-19
Pate1	chr9	35686969	35687369	2.13509	8.57772e-11
Bcl2l1	chr2	152825700	152826100	2.11803	4.93177e-12
Igsf3	chr3	101379773	101380173	2.10622	1.49359e-14
Upb1	chr10	75434539	75434939	2.10248	5.02855e-15
Ptpn22	chr3	103907741	103908141	2.1015	2.62366e-15
6430710C18Rik	chr2	72838106	72838506	2.09648	2.84667e-13
Slc25a30	chr14	75763821	75764221	2.09223	4.62115e-12
Nek10	chr14	14781238	14781638	2.09155	1.53553e-10
Rasgrf1	chr9	89869498	89869898	2.08648	1.51177e-14
Rab3gap1	chr1	127861891	127862291	2.08141	5.68243e-09
Twist2	chr1	91697068	91697468	2.07805	6.94686e-08
Rbfox1	chr16	5735207	5735607	2.07792	5.34566e-08
Plat	chr8	22765642	22766042	2.07404	6.96112e-11
Dtwd1	chr2	126303250	126303650	2.07009	1.51974e-08
Ralgapa2	chr2	146522098	146522498	2.06259	2.93208e-10
Morrbid	chr2	128465570	128465970	2.06213	4.10593e-12
Gm7168	chr17	13925915	13926315	2.05438	3.16117e-10
Pus10	chr11	23734884	23735284	2.04899	6.3884e-14
4933440J02Rik	chr10	111637099	111637499	2.04481	6.84388e-16
Col23a1	chr11	51457606	51458006	2.04078	9.21993e-09
Mirg	chr12	109749724	109750124	2.04041	3.73053e-14
Peli1	chr11	21013147	21013547	2.0379	1.81832e-07
Smad3	chr9	63698750	63699150	2.03458	9.91894e-15
Fmo9	chr1	166710782	166711182	2.03434	2.14642e-12
1500015A07Rik	chr18	61744494	61744894	2.03155	1.37102e-08
Syt6	chr3	103640127	103640527	2.027	1.33378e-11
Akna	chr4	63383418	63383818	2.02496	5.62009e-11
Odc1	chr12	17507092	17507492	2.02115	6.12812e-20
Gm13710	chr2	84511586	84511986	2.01883	2.46967e-10
Ptgs2os2	chr1	150197772	150198172	2.01118	1.83736e-12
Hpcal4	chr4	123164120	123164520	2.00927	8.94849e-08
Itga11	chr9	62624648	62625048	2.00884	6.09931e-09
Frmd4a	chr2	4501602	4502002	2.00696	1.00748e-10
Hivep3	chr4	119932632	119933032	2.00678	9.05438e-26
Plac8	chr5	100587613	100588013	2.00552	2.21938e-07
A930001A20Rik	chr3	15072503	15072903	2.00235	6.58951e-08
Snord83b	chr15	80062839	80063239	1.99432	4.05136e-11
4933430M04Rik	chr11	24401433	24401833	1.99397	5.3906e-08
Chsy1	chr7	66185327	66185727	1.99336	2.01891e-09
Car2	chr3	14917306	14917706	1.99266	3.11859e-09
1700016G22Rik	chr13	5789309	5789709	1.99249	2.24299e-09
Cd44	chr2	102873308	102873708	1.99054	2.46914e-12
1700064M15Rik	chr12	99686626	99687026	1.98889	2.6425e-17
4933416M07Rik	chr8	27146288	27146688	1.97756	4.99904e-08
Dock10	chr1	80603109	80603509	1.97519	3.38656e-17
Cd101	chr3	101047721	101048121	1.97512	3.64356e-15
Zdhhc7	chr8	120065617	120066017	1.97451	3.24774e-10
Pgm5	chr19	24787190	24787590	1.97232	2.63141e-09
Prelid3b	chr2	174502783	174503183	1.96666	1.59999e-16
4930459C07Rik	chr10	96093969	96094369	1.96656	1.02523e-06
Rhob	chr12	8510967	8511367	1.96601	1.57259e-16
Ccdc88b	chr19	6876895	6877295	1.96544	9.92005e-13
Rapgef5	chr12	117516248	117516648	1.96526	1.3965e-09
Malt1	chr18	65480540	65480940	1.96416	1.49038e-14
Col6a1	chr10	76744203	76744603	1.95209	8.81398e-07
Atp10b	chr11	43093811	43094211	1.95098	1.49409e-07
Chst11	chr10	82962618	82963018	1.95028	3.23071e-13
Il36a	chr2	24214896	24215296	1.94529	3.20095e-09
Gm11541	chr11	94692491	94692891	1.94195	6.23629e-18
Dst	chr1	33989658	33990058	1.93986	4.9818e-09
Sik3	chr9	46168752	46169152	1.93431	7.96976e-14
Arhgap22	chr14	33287904	33288304	1.93428	7.0255e-11
Zyg11b	chr4	108314021	108314421	1.92507	6.06005e-08
Wsb1	chr11	79197451	79197851	1.92448	8.63875e-13
Dcbld2	chr16	58415192	58415592	1.92385	5.24422e-11
Gm14204	chr2	158578319	158578719	1.9217	3.18876e-07
Fam136a	chr6	86318837	86319237	1.91746	9.49879e-15
Cpd	chr11	76815510	76815910	1.91738	5.12504e-07
Furin	chr7	80416893	80417293	1.91508	6.50454e-09
Nenf	chr1	191283124	191283524	1.90806	1.33551e-14
Rapgef2	chr3	78899469	78899869	1.90728	1.4198e-12
Zfp746	chr6	48096613	48097013	1.90525	1.3843e-07
Akap9	chr5	4036874	4037274	1.90364	5.92155e-08
Flnc	chr6	29436572	29436972	1.90087	9.83489e-19
Igf2bp2	chr16	22124307	22124707	1.89842	5.63173e-11
Il1a	chr2	129338208	129338608	1.89357	7.08056e-22
Prrc2c	chr1	162773674	162774074	1.89354	7.93987e-11
Gm21859	chr16	10937525	10937925	1.89287	6.45144e-12
Mirt1	chr19	53433902	53434302	1.88855	1.85024e-15
Nfkbiz	chr16	55809378	55809778	1.88769	4.17758e-20
1600002D24Rik	chr16	95902213	95902613	1.8853	3.04471e-17
Mir101b	chr19	29150142	29150542	1.88334	3.64778e-11
Bvht	chr18	61622023	61622423	1.88297	8.61008e-08
Heca	chr10	17971672	17972072	1.88216	1.09135e-07
Tbata	chr10	61204007	61204407	1.88111	2.38283e-10
Mtmr7	chr8	40595203	40595603	1.87263	7.83136e-21
Fads1	chr19	10163988	10164388	1.87258	3.81033e-17
Dhcr7	chr7	143843702	143844102	1.87119	1.46327e-07
Slc11a2	chr15	100411191	100411591	1.86965	5.92195e-08
4933412E24Rik	chr15	60141662	60142062	1.86299	1.35139e-07
Ttc26	chr6	38374335	38374735	1.86069	1.43053e-15
Morrbid	chr2	128287975	128288375	1.85677	7.09095e-20
Dpp10	chr1	123580112	123580512	1.85159	3.51184e-10
Nckap1l	chr15	103476644	103477044	1.85156	5.79056e-12
Usp43	chr11	67839819	67840219	1.84905	1.47693e-08
Dnajc11	chr4	151928921	151929321	1.84785	9.76191e-12
F630040K05Rik	chr17	45798836	45799236	1.84625	3.07329e-08
Zfand3	chr17	30070638	30071038	1.84296	4.32159e-08
1600002D24Rik	chr16	95887750	95888150	1.84232	9.85623e-12
Apbb1ip	chr2	22761228	22761628	1.84071	4.05515e-14
Lpp	chr16	24778350	24778750	1.83941	7.76546e-11
Mir7213	chr15	79993422	79993822	1.83858	1.66247e-12
Bcl2l11	chr2	128229721	128230121	1.83769	8.26327e-15
Itpk1	chr12	102653004	102653404	1.83522	5.70692e-15
Ptges	chr2	30925144	30925544	1.8315	3.99509e-16
Crybg3	chr16	59529575	59529975	1.83103	6.61556e-13
Myo16	chr8	10534889	10535289	1.82936	7.26745e-13
Mir6395	chr8	34225062	34225462	1.82838	5.39425e-07
Cacna1g	chr11	94469408	94469808	1.82692	1.42868e-09
4930543N07Rik	chr7	138622416	138622816	1.82511	3.87211e-11
Alkbh3os1	chr2	93979730	93980130	1.81764	8.83012e-11
Ric8b	chr10	85038197	85038597	1.81759	6.26414e-07
Acod1	chr14	103046748	103047148	1.81345	6.49531e-20
Furin	chr7	80412232	80412632	1.81158	2.33706e-09
Ttc17	chr2	94339450	94339850	1.8104	1.22206e-07
Egr2	chr10	67524004	67524404	1.80825	5.12211e-09
Denn2b	chr7	109666776	109667176	1.80766	1.19698e-09
Thap1	chr8	26245852	26246252	1.80422	1.56289e-06
Alpk2	chr18	65328622	65329022	1.80301	5.44709e-25
Atxn1	chr13	46098561	46098961	1.80078	3.65341e-07
Adgrd1	chr5	129190149	129190549	1.79906	1.18987e-09
Tnfaip3	chr10	19026681	19027081	1.79804	4.15385e-11
Dtwd1	chr2	126310029	126310429	1.79762	1.28839e-13
Ell2	chr13	75754357	75754757	1.79754	2.58385e-09
Slc20a1	chr2	129192733	129193133	1.79681	2.77586e-12
Runx2	chr17	44718151	44718551	1.79188	7.83311e-13
Kcnk10	chr12	98577926	98578326	1.79183	1.53249e-09
Cdyl2	chr8	116735416	116735816	1.79178	4.80555e-11
Ank1	chr8	23048287	23048687	1.78938	5.74571e-08
Mt4	chr8	94134592	94134992	1.78834	3.41661e-14
4930503L19Rik	chr18	70391376	70391776	1.78732	6.27548e-14
1700065J11Rik	chr6	35426313	35426713	1.78477	9.31613e-07
Myo3b	chr2	70129682	70130082	1.78474	1.38326e-07
F630040K05Rik	chr17	45746745	45747145	1.78414	4.41509e-14
Reps1	chr10	18076946	18077346	1.78112	5.6322e-09
4933440J02Rik	chr10	111575988	111576388	1.77988	3.23892e-24
Gm10710	chr3	83185645	83186045	1.77837	3.97008e-08
Zbtb43	chr2	33498314	33498714	1.77735	9.94868e-09
Ubash3b	chr9	41048834	41049234	1.7769	3.79842e-12
Pard6b	chr2	168072762	168073162	1.77516	1.50173e-11
Atp2b1	chr10	98943824	98944224	1.77446	4.5014e-16
Tasp1	chr2	140080911	140081311	1.77382	1.67584e-12
Hilpda	chr6	29264324	29264724	1.77381	1.02528e-09
Tgds	chr14	118109716	118110116	1.77356	1.37099e-08
Arf6	chr12	69416814	69417214	1.77297	2.10092e-10
Rap2b	chr3	61340106	61340506	1.77171	9.39256e-12
Pard6b	chr2	168063618	168064018	1.77065	1.32544e-18
4933440J02Rik	chr10	111619830	111620230	1.77004	2.45434e-21
Card10	chr15	78782834	78783234	1.76773	6.48934e-08
Gm49890	chr4	88935392	88935792	1.76616	1.28667e-07
Fabp1	chr6	71193222	71193622	1.7661	2.19719e-11
Zfp811	chr17	32810672	32811072	1.76599	4.72308e-09
Fosl2	chr5	32158279	32158679	1.75984	4.14047e-08
Dusp5	chr19	53507378	53507778	1.75939	1.7614e-10
Rbfox1	chr16	6828348	6828748	1.75916	8.47261e-12
Egr3	chr14	69994824	69995224	1.75797	1.27268e-07
Or1f19	chr16	3653933	3654333	1.75733	1.02369e-07
St3gal1	chr15	67138589	67138989	1.75688	1.88273e-09
Tmem174	chr13	98651229	98651629	1.75067	8.27322e-08
Popdc2	chr16	38368264	38368664	1.74924	7.24329e-12
Vat1l	chr8	114352013	114352413	1.74754	7.48722e-09
Gramd1b	chr9	40298602	40299002	1.74639	1.1607e-07
Pxn	chr5	115496987	115497387	1.74546	3.84401e-13
Csgalnact1	chr8	68553309	68553709	1.74106	4.3813e-07
Stap1	chr5	86096644	86097044	1.73986	4.65963e-12
Cxcr2	chr1	74155369	74155769	1.73918	6.85222e-16
4930543E12Rik	chr7	113133868	113134268	1.73745	2.05441e-21
Ubiad1	chr4	148366933	148367333	1.7373	2.15412e-08
Vav3	chr3	109248856	109249256	1.73556	3.23754e-14
Ptprj	chr2	90545248	90545648	1.73449	2.27908e-22
Gipc2	chr3	152142988	152143388	1.73291	5.32206e-11
Maml3	chr3	52060905	52061305	1.73276	2.84014e-08
Pdcl3	chr1	38972976	38973376	1.73271	1.80257e-06
Dysf	chr6	84011539	84011939	1.72962	8.38876e-08
E030025P04Rik	chr11	109177812	109178212	1.7267	7.7156e-08
Hdc	chr2	126606248	126606648	1.72567	1.13914e-13
4933427D06Rik	chr6	88971754	88972154	1.72296	1.4423e-08
Stfa3	chr16	36505183	36505583	1.72193	7.73256e-09
Glis1	chr4	107602850	107603250	1.72095	1.28038e-08
Lyn	chr4	3770399	3770799	1.72021	8.91815e-11
D030018L15Rik	chr15	96045558	96045958	1.71969	2.35737e-06
Ica1	chr6	8721587	8721987	1.71938	1.39879e-06
Smad3	chr9	63839391	63839791	1.71893	1.52909e-08
Fam136a	chr6	86325672	86326072	1.71766	3.5452e-06
Or7e177	chr9	20309447	20309847	1.7175	1.03205e-06
4930545H06Rik	chr10	68301016	68301416	1.71678	2.64777e-10
Ifrd1	chr12	40262967	40263367	1.71464	5.46745e-10
B930018H19Rik	chr8	34523824	34524224	1.71303	1.52689e-18
BB123696	chr13	52703710	52704110	1.71268	5.10313e-09
4833427F10Rik	chr17	35752537	35752937	1.71179	3.59862e-22
Csf3	chr11	98701148	98701548	1.71163	1.53092e-08
Arf2	chr11	104055944	104056344	1.71128	1.73302e-06
Vwa5b1	chr4	138578228	138578628	1.7095	7.39786e-06
Cop1	chr1	159217407	159217807	1.70892	1.81236e-17
Xxylt1	chr16	30835730	30836130	1.70881	3.45175e-06
Dusp5	chr19	53500817	53501217	1.70831	2.21901e-07
Lrrtm3	chr10	64002072	64002472	1.7074	6.89645e-08
Rbfox3	chr11	118523838	118524238	1.70149	9.68135e-08
Mir221	chrX	19141180	19141580	1.70056	1.51558e-10
Hopx	chr5	77087120	77087520	1.7004	2.59645e-06
Epha2	chr4	141330014	141330414	1.69994	5.24371e-14
Gm20125	chr10	16578616	16579016	1.69849	5.42559e-10
Plbd1	chr6	136656341	136656741	1.69685	8.59394e-12
Astl	chr2	127339020	127339420	1.6966	5.26574e-17
Hsd17b12	chr2	94089918	94090318	1.6959	7.86412e-08
Slc28a3	chr13	58648808	58649208	1.69574	5.90997e-06
Kcnj12	chr11	61062291	61062691	1.69367	6.19129e-07
Aim2	chr1	173411928	173412328	1.68802	1.42423e-12
Trim66	chr7	109484091	109484491	1.68736	3.41834e-07
Mir221	chrX	19142701	19143101	1.68735	3.01436e-07
Usp47	chr7	111984472	111984872	1.68578	4.46139e-06
1700047M11Rik	chr1	182302407	182302807	1.68547	6.40419e-15
Fas	chr19	34298935	34299335	1.68513	3.15389e-07
Fabp5	chr3	9983871	9984271	1.68354	2.05687e-14
Atp6v1e2	chr17	86950199	86950599	1.67859	1.22921e-10
Ap1s3	chr1	79640219	79640619	1.67833	5.98317e-12
Dusp4	chr8	34758986	34759386	1.67699	1.74905e-13
Rplp1	chr9	61669634	61670034	1.67628	8.91987e-06
Bin3	chr14	70106762	70107162	1.67548	5.79005e-20
Gm15915	chr10	93697869	93698269	1.6733	7.24039e-07
Pcdh7	chr5	57864284	57864684	1.67324	4.74707e-10
Nfatc2	chr2	168517947	168518347	1.67246	3.58729e-14
Arid1b	chr17	5174436	5174836	1.67143	9.69691e-13
Vtcn1	chr3	100848282	100848682	1.67101	1.74136e-07
Smndc1	chr19	53413910	53414310	1.6705	6.90098e-08
Ptges	chr2	30920177	30920577	1.6695	9.3107e-13
Hsf2bp	chr17	31967347	31967747	1.66569	5.07673e-10
Pgap2	chr7	102229763	102230163	1.66441	3.28942e-13
Lamc3	chr2	31880881	31881281	1.66267	7.29848e-14
Crhr1	chr11	104083666	104084066	1.66233	1.40221e-07
Tsga13	chr6	30907985	30908385	1.66096	3.89197e-06
Slc36a3	chr11	55127875	55128275	1.65493	4.53408e-08
Mpzl1	chr1	165609739	165610139	1.65409	4.9473e-07
Pex3	chr10	13572374	13572774	1.65235	3.78435e-07
Cep120	chr18	53722811	53723211	1.65194	4.12986e-13
Gm2716	chr8	88091628	88092028	1.65092	2.43442e-13
Bcl2l11	chr2	128162641	128163041	1.64992	1.25488e-05
Prkg2	chr5	98943784	98944184	1.6477	1.37953e-07
Mapk14	chr17	28751764	28752164	1.64548	1.07036e-08
Uts2	chr4	150973231	150973631	1.64356	7.51796e-11
Cped1	chr6	21998147	21998547	1.64342	3.1275e-08
Fam170a	chr18	50398080	50398480	1.64206	1.65615e-05
Etl4	chr2	20018405	20018805	1.64105	1.05115e-06
4933428G20Rik	chr11	97505776	97506176	1.64037	2.76668e-07
Jak1	chr4	101141781	101142181	1.63925	4.71595e-08
Dnajb6	chr5	29861494	29861894	1.63798	6.54653e-14
4930554I06Rik	chr19	21077763	21078163	1.63772	1.81422e-14
4930563J15Rik	chr10	67646655	67647055	1.63771	1.17232e-08
Agap2	chr10	127086566	127086966	1.63768	2.51248e-07
Lasp1	chr11	97825237	97825637	1.63515	3.7307e-13
Pitx1	chr13	55897859	55898259	1.63307	7.33512e-08
Dcbld2	chr16	58413834	58414234	1.62987	3.09935e-08
Abhd17c	chr7	84196966	84197366	1.62868	4.42935e-11
Bckdhb	chr9	84135013	84135413	1.62673	4.49668e-16
Nron	chr2	33760520	33760920	1.62644	1.45493e-07
Manba	chr3	135556099	135556499	1.62555	1.02138e-06
Garin4	chr1	191166652	191167052	1.62298	9.35043e-10
Sh3pxd2b	chr11	32355364	32355764	1.62284	2.23989e-11
Btg1	chr10	96628318	96628718	1.6222	4.40261e-14
Tgfbr2	chr9	116152921	116153321	1.62154	1.28247e-09
Gm28729	chr9	96515761	96516161	1.62129	2.85207e-10
Apbb1ip	chr2	22781328	22781728	1.61864	1.35499e-09
Gm48957	chr15	25444224	25444624	1.61717	3.01615e-08
Txnrd1	chr10	82923493	82923893	1.61584	5.29256e-14
4930431P22Rik	chr14	76755656	76756056	1.61569	1.13951e-07
Rhobtb3	chr13	75883697	75884097	1.61436	2.22386e-06
Nfil3	chr13	52973481	52973881	1.61159	1.86013e-09
Ccdc194	chr8	71527091	71527491	1.61047	7.71873e-10
Clic6	chr16	92524604	92525004	1.61008	1.02041e-07
Sv2c	chr13	96131126	96131526	1.60957	8.64406e-08
Mir3109	chr9	69458218	69458618	1.608	3.03865e-16
Btrc	chr19	45339350	45339750	1.60748	8.03345e-08
Hivep3	chr4	119964805	119965205	1.60688	6.83705e-18
Sde2	chr1	180858699	180859099	1.60684	4.28115e-11
D330050G23Rik	chr2	116965261	116965661	1.60574	2.53034e-07
Ust	chr10	8362100	8362500	1.60489	2.58314e-06
Ddr1	chr17	35704645	35705045	1.60434	1.00602e-09
Skap2	chr6	51988040	51988440	1.60396	8.39993e-09
Ndp	chrX	16953376	16953776	1.60357	3.14321e-06
Kif20b	chr19	35127997	35128397	1.60064	2.02586e-09
Wscd2	chr5	113594473	113594873	1.59956	1.29217e-21
Flt1	chr5	147707484	147707884	1.59945	1.41843e-10
Fgf1	chr18	38939171	38939571	1.59892	1.65897e-14
Col5a3	chr9	20812775	20813175	1.59766	1.66361e-10
Fam83g	chr11	61687024	61687424	1.59759	8.50937e-07
Dpf3	chr12	83326717	83327117	1.59596	3.23363e-12
Gm20125	chr10	16524137	16524537	1.59496	1.68619e-12
Cyp46a1	chr12	108325366	108325766	1.59359	1.60902e-06
Slc36a1	chr11	55250482	55250882	1.59305	2.62273e-10
Siah3	chr14	75444583	75444983	1.59206	2.15572e-06
Rassf8	chr6	145723426	145723826	1.59087	3.49615e-11
Dnai2	chr11	114725023	114725423	1.58935	4.60164e-15
Anxa2	chr9	69467688	69468088	1.58802	2.02986e-07
Ifitm10	chr7	142363095	142363495	1.58797	1.20183e-10
Tmem98	chr11	80798136	80798536	1.58632	1.91158e-08
Runx1	chr16	92852277	92852677	1.58631	1.79967e-12
Dnai4	chr4	103095939	103096339	1.58614	1.4162e-06
Pid1	chr1	83959801	83960201	1.58607	2.213e-06
Sh2d4a	chr8	68246960	68247360	1.58566	1.87329e-08
Kcna1	chr6	126653567	126653967	1.58418	1.3486e-06
Uqcc2	chr17	27131221	27131621	1.58383	2.22742e-11
Nrxn2	chr19	6458242	6458642	1.58367	4.81139e-06
Rfx4	chr10	84726956	84727356	1.58339	2.8581e-07
Mir8120	chr3	65603438	65603838	1.58188	5.13119e-13
Cdc42bpg	chr19	6302506	6302906	1.58062	5.45385e-13
Smarca2	chr19	26414706	26415106	1.57859	3.61268e-09
Mib1	chr18	10718546	10718946	1.57721	3.31653e-06
Sipa1l2	chr8	125343889	125344289	1.57714	4.35803e-15
Gm19619	chr5	91303030	91303430	1.57563	5.22772e-08
4833427F10Rik	chr17	35771623	35772023	1.57553	3.74202e-08
Selplg	chr5	113826590	113826990	1.57538	3.28281e-07
Agpat4	chr17	12209530	12209930	1.57367	1.60925e-08
Arhgef3	chr14	27341506	27341906	1.57216	1.25151e-07
Hydin	chr8	110462778	110463178	1.57004	8.85559e-12
Rbfox1	chr16	6963539	6963939	1.56924	1.44972e-09
Nhsl2	chrX	102094434	102094834	1.56842	4.46128e-09
Cyth2	chr7	45802592	45802992	1.56808	9.50848e-10
St6galnac4	chr2	32585305	32585705	1.56716	3.1881e-15
Hand1	chr11	57906629	57907029	1.56577	4.51033e-13
5430403N17Rik	chr8	35915793	35916193	1.56337	3.26959e-08
Hivep3	chr4	120062074	120062474	1.56188	6.73406e-08
Mical2	chr7	112193060	112193460	1.56096	6.39385e-06
Mchr1	chr15	81217100	81217500	1.56084	5.01954e-07
Cd83	chr13	43777937	43778337	1.55925	1.65746e-16
Ccl4	chr11	83662272	83662672	1.55906	8.69494e-21
Hdac5	chr11	102201408	102201808	1.55795	8.90176e-10
Casz1	chr4	148820152	148820552	1.55754	1.50775e-06
Sec11c	chr18	65794754	65795154	1.5543	1.07422e-08
Pcgf5	chr19	36364752	36365152	1.55378	5.71981e-07
Podxl	chr6	31531854	31532254	1.55314	3.99239e-06
Pim1	chr17	29439942	29440342	1.5525	2.33968e-12
Batf	chr12	85666540	85666940	1.54986	2.79207e-07
Itih1	chr14	30938528	30938928	1.54807	9.82213e-07
Mir466k	chr3	85478717	85479117	1.54659	1.07231e-06
Tns3	chr11	8594398	8594798	1.54484	5.7891e-17
Zeb2	chr2	45126361	45126761	1.54182	9.70254e-12
Mcfd2	chr17	87237002	87237402	1.54015	5.68104e-08
Dlgap1	chr17	70446455	70446855	1.53754	1.724e-05
Tnc	chr4	63970833	63971233	1.53314	3.08728e-07
A330074K22Rik	chr8	120205962	120206362	1.53246	4.62035e-08
Lingo1	chr9	56712601	56713001	1.53214	6.33121e-09
Itgb7	chr15	102232796	102233196	1.53213	2.79484e-09
Mir670	chr2	94288130	94288530	1.53212	4.3366e-13
Wincr1	chr4	89038832	89039232	1.53195	2.83738e-06
Stx16	chr2	174067729	174068129	1.53163	6.39031e-06
Shoc2	chr19	53990405	53990805	1.5304	1.79692e-08
Mir6921	chr11	60192428	60192828	1.53022	1.36951e-09
Ptgs2	chr1	150108477	150108877	1.53008	1.15139e-06
Txndc2	chr17	65648351	65648751	1.52883	4.77867e-08
Hs1bp3	chr12	8386441	8386841	1.52875	3.23486e-07
Exoc4	chr6	33804813	33805213	1.5281	1.84902e-06
Bvht	chr18	61640591	61640991	1.528	3.33527e-11
Mfhas1	chr8	35614048	35614448	1.52779	5.7373e-12
Gm8633	chr10	98561964	98562364	1.52713	2.60811e-07
Zfp941	chr7	140828189	140828589	1.52674	1.02787e-08
Ppp4r2	chr6	100799224	100799624	1.52664	5.95668e-08
Odc1	chr12	17552757	17553157	1.52641	1.16316e-10
Gch1	chr14	47160295	47160695	1.52537	3.77756e-06
Tet2	chr3	133436992	133437392	1.52432	2.21246e-07
Slc6a5	chr7	49887919	49888319	1.52378	1.02722e-13
Ngef	chr1	87492337	87492737	1.52309	1.29055e-06
Slc37a1	chr17	31309505	31309905	1.52308	1.7024e-07
Gm19510	chr15	59725899	59726299	1.52277	7.23973e-11
Tmem86a	chr7	47031325	47031725	1.52235	2.96303e-08
Aass	chr6	23183337	23183737	1.52043	1.37904e-05
Or1f19	chr16	3651845	3652245	1.52039	4.78452e-08
Stk31	chr6	49586517	49586917	1.51935	1.1485e-06
Aqp9	chr9	71077352	71077752	1.51892	2.8883e-06
Mroh2b	chr15	4836394	4836794	1.51641	5.67134e-07
Gdpd4	chr7	97944020	97944420	1.51636	6.04144e-09
Fam50b	chr13	34708969	34709369	1.51629	2.97529e-07
Ssh1	chr5	113964932	113965332	1.51592	6.85935e-07
Bmper	chr9	23694458	23694858	1.51241	2.5341e-05
Bach2	chr4	32464534	32464934	1.50947	2.02505e-05
Phactr2	chr10	13301075	13301475	1.50832	4.80211e-07
Slc6a5	chr7	49907996	49908396	1.50713	9.55706e-07
Dgkh	chr14	78765059	78765459	1.5057	2.53638e-07
Arid5a	chr1	36303379	36303779	1.50367	1.01004e-12
2610318M16Rik	chr14	8356937	8357337	1.50354	4.02582e-08
Msmo1	chr8	64716011	64716411	1.5034	9.64684e-08
Cracr2a	chr6	127657173	127657573	1.50299	5.86794e-08
Vmp1	chr11	86592999	86593399	1.4999	5.04287e-12
Ezr	chr17	6808155	6808555	1.49976	1.36929e-06
Ece1	chr4	137864767	137865167	1.49924	1.25416e-07
Fblim1	chr4	141590724	141591124	1.49896	6.03139e-06
Icosl	chr10	78115121	78115521	1.49888	2.53843e-06
Lpar1	chr4	58477635	58478035	1.49825	6.05637e-12
Ranbp6	chr19	29850119	29850519	1.49705	3.31051e-13
Sik3	chr9	46046954	46047354	1.49588	1.0551e-06
Lef1	chr3	131085146	131085546	1.49542	3.70075e-12
4930431P22Rik	chr14	76787542	76787942	1.49408	2.39557e-12
Rprml	chr11	103649358	103649758	1.49375	8.79656e-08
Il20rb	chr9	100394176	100394576	1.49291	2.74228e-06
Tmprss4	chr9	45231679	45232079	1.49234	1.30661e-12
Tab2	chr10	7942993	7943393	1.49227	3.99676e-06
Agpat4	chr17	12165427	12165827	1.49211	7.63184e-08
Gipc2	chr3	152127209	152127609	1.49207	4.85049e-10
Scrg1	chr8	57401326	57401726	1.4908	8.89548e-07
Fndc3a	chr14	72835155	72835555	1.48821	1.84999e-10
Hipk2	chr6	38835318	38835718	1.48573	5.01704e-06
Gm8633	chr10	98508429	98508829	1.48431	4.8815e-07
Sash1	chr10	8875256	8875656	1.48397	1.25243e-13
Abca14	chr7	120218084	120218484	1.48353	1.01116e-05
F11	chr8	45258464	45258864	1.48348	8.34049e-09
Trim36	chr18	46149486	46149886	1.48299	8.91137e-10
Gm11548	chr3	36500948	36501348	1.48234	3.44826e-07
Alcam	chr16	52376848	52377248	1.48191	1.92682e-09
Mir155hg	chr16	84606125	84606525	1.48122	3.04812e-10
5330413P13Rik	chr2	131744080	131744480	1.48067	6.28167e-06
Myo1e	chr9	70290723	70291123	1.48044	2.47788e-09
Piezo1	chr8	122549092	122549492	1.47933	6.40579e-13
Prrc2c	chr1	162763060	162763460	1.47876	1.04117e-08
Foxa1	chr12	57532324	57532724	1.47707	1.97409e-06
Rusc2	chr4	43349566	43349966	1.47507	2.5362e-06
Tmem252	chr19	24692742	24693142	1.47416	4.75919e-05
Loxhd1	chr18	77285075	77285475	1.47347	5.77636e-06
Ptafr	chr4	132591258	132591658	1.47335	1.92512e-10
Flt3	chr5	147389945	147390345	1.47299	3.83444e-08
Runx1	chr16	93009075	93009475	1.47259	9.62445e-06
Lpp	chr16	24678958	24679358	1.47217	3.90538e-10
Thbs4	chr13	92804304	92804704	1.47205	2.06631e-06
Anxa4	chr6	86784781	86785181	1.47137	1.31717e-09
1700057H15Rik	chr4	124396927	124397327	1.47102	1.31558e-07
Serpine1	chr5	137063880	137064280	1.47081	2.48724e-10
Hand1	chr11	57911684	57912084	1.46887	8.78425e-11
Ptpdc1	chr13	48609105	48609505	1.46683	2.04762e-05
Prkaa1	chr15	5145621	5146021	1.46599	5.30774e-09
Stk40	chr4	126137760	126138160	1.46555	1.56874e-07
Ptprc	chr1	138144411	138144811	1.46344	4.08962e-08
Trpm7	chr2	126792665	126793065	1.46199	6.38076e-06
Dnttip1	chr2	164749029	164749429	1.46176	1.48833e-07
Slc28a3	chr13	58494805	58495205	1.46076	1.39176e-06
Laptm4a	chr12	8875588	8875988	1.46068	6.49635e-07
Thap1	chr8	26239543	26239943	1.45441	1.48725e-11
Fosl2	chr5	32133021	32133421	1.4541	1.7209e-14
Twist2	chr1	91722440	91722840	1.4532	6.55377e-06
Maf	chr8	115392382	115392782	1.45247	7.54034e-06
Hs3st3a1	chr11	64655163	64655563	1.45219	3.12978e-11
C330024C12Rik	chr17	87206739	87207139	1.45169	1.54831e-11
Tpm1	chr9	67045322	67045722	1.45091	1.33392e-09
Gpr142	chr11	114807753	114808153	1.44982	8.04607e-09
Pcdh7	chr5	57851311	57851711	1.44874	9.10859e-10
Asb7	chr7	66586544	66586944	1.44799	2.84955e-05
Mki67	chr7	135813559	135813959	1.44786	5.12033e-09
Pde4c	chr8	70729135	70729535	1.44702	9.29987e-07
Shisal2a	chr4	108380182	108380582	1.44691	1.423e-07
Trerf1	chr17	47156167	47156567	1.44633	4.61045e-11
4930527F14Rik	chr14	45561798	45562198	1.44447	3.49816e-09
Gm10710	chr3	83217535	83217935	1.44328	4.37984e-09
Tasp1	chr2	140101125	140101525	1.44314	1.6743e-07
Cnih3	chr1	181408043	181408443	1.44158	2.81396e-06
Lrp6	chr6	134450737	134451137	1.44073	7.64958e-06
Ccl5	chr11	83527958	83528358	1.44054	3.58657e-07
Dcbld1	chr10	52272995	52273395	1.44018	1.46763e-06
Folr2	chr7	101853913	101854313	1.43984	3.41845e-15
Flt1	chr5	147721482	147721882	1.43956	7.64219e-07
Rbpms2	chr9	65636931	65637331	1.43831	8.95358e-09
Cd9	chr6	125483438	125483838	1.43604	7.98035e-19
Siglecg	chr7	43399485	43399885	1.43532	7.10818e-15
Cd9	chr6	125443959	125444359	1.43435	1.04461e-21
5430437J10Rik	chr15	5512422	5512822	1.43372	3.67994e-06
Gramd3	chr18	56370323	56370723	1.43323	9.54783e-06
Mier2	chr10	79548563	79548963	1.4331	1.91958e-08
Jak2	chr19	29271134	29271534	1.43263	6.32081e-06
Alg10b	chr15	90124005	90124405	1.43149	1.73063e-06
Mt1	chr8	94194895	94195295	1.43139	3.70473e-12
1600020E01Rik	chr6	86513347	86513747	1.43019	7.86573e-12
Dlgap2	chr8	14680145	14680545	1.42972	5.50128e-11
Smndc1	chr19	53408347	53408747	1.42971	3.23231e-12
Il20rb	chr9	100488864	100489264	1.42969	1.4335e-08
Btg2	chr1	134082992	134083392	1.42932	4.8792e-13
Acpp	chr9	104375534	104375934	1.42931	1.33e-07
Slc5a1	chr5	33095382	33095782	1.42769	1.84329e-12
A530064D06Rik	chr17	48185203	48185603	1.42742	3.25668e-06
Tecta	chr9	42336996	42337396	1.42656	5.05524e-08
4933440J02Rik	chr10	111583609	111584009	1.42558	5.42066e-12
Rps6ka3	chrX	158937545	158937945	1.42498	2.94205e-06
Pus10	chr11	23741350	23741750	1.42487	7.18882e-08
Txnrd1	chr10	82922029	82922429	1.42402	3.22208e-06
Ube2v2	chr16	15461219	15461619	1.42315	1.09441e-05
Stx3	chr19	11813145	11813545	1.42241	6.27511e-10
Spdl1	chr11	34879714	34880114	1.42211	2.54139e-05
F630040K05Rik	chr17	45807422	45807822	1.42177	3.84739e-07
Rmdn2	chr17	79599233	79599633	1.42108	1.33755e-13
Clcn7	chr17	25129237	25129637	1.42099	2.44475e-07
Pole4	chr6	82640059	82640459	1.42087	3.61328e-09
Rbfox1	chr16	6842296	6842696	1.42066	3.1037e-13
Cd47	chr16	49896244	49896644	1.41763	4.84315e-07
Il33	chr19	29887486	29887886	1.41719	4.78693e-06
Irf4	chr13	30831404	30831804	1.41716	4.54118e-10
Nfkb1	chr3	135583351	135583751	1.41663	1.85134e-09
Mical2	chr7	112316388	112316788	1.41569	4.277e-08
Tnks	chr8	34823553	34823953	1.41388	1.44265e-06
Sdc1	chr12	8826938	8827338	1.41276	6.42815e-09
Lipg	chr18	74921625	74922025	1.41163	1.41168e-06
Gata2	chr6	88174642	88175042	1.4115	5.70019e-06
Denr	chr5	123914857	123915257	1.41127	2.43382e-11
Tmbim1	chr1	74297297	74297697	1.41107	4.65851e-11
Gtdc1	chr2	44956272	44956672	1.41033	1.53409e-09
Tnip1	chr11	54936001	54936401	1.41033	2.76631e-15
4933411E08Rik	chr10	117984809	117985209	1.41018	1.97437e-07
Odc1	chr12	17455047	17455447	1.40971	1.84003e-14
Csgalnact1	chr8	68740144	68740544	1.40958	6.54829e-06
Lipc	chr9	71015878	71016278	1.40931	6.46959e-07
Trpv3	chr11	73267256	73267656	1.40836	3.4829e-06
Smyd1	chr6	71233932	71234332	1.40762	3.73838e-09
0610040F04Rik	chr6	108665565	108665965	1.40654	2.32219e-09
Cpd	chr11	76823654	76824054	1.4055	9.45579e-06
Smg7	chr1	152921740	152922140	1.40263	5.00152e-06
Snx12	chrX	101186352	101186752	1.40256	5.37484e-05
Gfod1	chr13	43284666	43285066	1.40088	1.29855e-09
Hilpda	chr6	29270968	29271368	1.40009	1.07958e-09
Twist2	chr1	91692770	91693170	1.39695	2.79147e-07
Stap1	chr5	86109363	86109763	1.39642	4.50064e-07
A730020M07Rik	chr3	121600410	121600810	1.39624	5.4265e-08
Gfod1	chr13	43319417	43319817	1.39586	3.92166e-10
Mitf	chr6	97952831	97953231	1.39569	5.78502e-06
Tmco4	chr4	138998636	138999036	1.3948	3.59093e-05
Fhad1	chr4	141928794	141929194	1.39423	2.80969e-12
Bcl2l14	chr6	134372986	134373386	1.39302	2.13164e-06
Plek2	chr12	78940080	78940480	1.39208	7.84742e-09
Ntrk1	chr3	87783590	87783990	1.39134	1.43459e-11
Cdk17	chr10	93138728	93139128	1.391	1.8893e-09
Pla1a	chr16	38394988	38395388	1.39069	9.38621e-11
Gadd45a	chr6	67040936	67041336	1.38953	8.38575e-11
Osm	chr11	4229857	4230257	1.38943	1.34221e-07
Clmp	chr9	40747307	40747707	1.3893	5.20953e-09
Cfap46	chr7	139718843	139719243	1.38842	7.71491e-06
Irf2bp1	chr7	19010614	19011014	1.38824	4.95555e-09
Ints9	chr14	64979575	64979975	1.38653	2.35023e-06
Ubxn11	chr4	134113421	134113821	1.38623	3.95415e-07
Dusp5	chr19	53543580	53543980	1.38615	7.14629e-11
Mamld1	chrX	70883366	70883766	1.38481	1.21934e-06
Ywhaz	chr15	36762034	36762434	1.38459	1.39812e-08
4930543E12Rik	chr7	113140076	113140476	1.38451	9.4347e-11
Hipk2	chr6	38809505	38809905	1.38359	3.32558e-10
Ptpn22	chr3	103862633	103863033	1.38203	4.3559e-11
Rbp2	chr9	98499664	98500064	1.38149	3.76361e-05
Paxbp1	chr16	91056476	91056876	1.38091	3.25692e-13
Pik3r1	chr13	101879671	101880071	1.3807	6.93627e-06
Hs3st2	chr7	121296209	121296609	1.37985	1.2067e-07
Ascc3	chr10	50568208	50568608	1.37933	6.96716e-06
Frmd6	chr12	70695076	70695476	1.37848	2.5895e-07
Cwh43	chr5	73401408	73401808	1.37824	7.85065e-12
Slc13a4	chr6	35273256	35273656	1.37767	1.53288e-08
Hrk	chr5	118180762	118181162	1.37764	3.09769e-07
Rab30	chr7	92811633	92812033	1.3771	2.80634e-05
Ctnnbl1	chr2	157696215	157696615	1.37679	6.12765e-05
Arhgef37	chr18	61526769	61527169	1.37678	1.38586e-06
A330032B11Rik	chr19	37072812	37073212	1.37457	4.54307e-05
Tes	chr6	17055690	17056090	1.37353	2.58627e-07
Ttc7b	chr12	100353884	100354284	1.37233	5.56442e-09
Thbs4	chr13	92791332	92791732	1.3721	5.80675e-06
Carlr	chr2	18798731	18799131	1.3713	2.09887e-07
Kifc3	chr8	95210103	95210503	1.37061	2.4273e-09
A330074K22Rik	chr8	120225747	120226147	1.36854	2.56749e-11
Axl	chr7	25783877	25784277	1.36834	1.07589e-08
Adamts14	chr10	61272126	61272526	1.36805	2.39871e-07
Dhx34	chr7	16199156	16199556	1.36627	3.06308e-06
Gprc5a	chr6	135060696	135061096	1.36591	3.85915e-08
Akap9	chr5	4078772	4079172	1.36535	1.74647e-06
Slc4a7	chr14	14708667	14709067	1.3644	3.53402e-08
Jarid2	chr13	44715250	44715650	1.36433	3.38965e-05
Tmem182	chr1	40875027	40875427	1.36409	1.47133e-07
Plxdc1	chr11	97971269	97971669	1.36376	2.3573e-07
Marchf4	chr1	72552929	72553329	1.36357	0.000104046
Akap13	chr7	75666994	75667394	1.36182	1.32501e-12
Prkca	chr11	108038978	108039378	1.36171	8.61873e-06
Ptpn5	chr7	47108884	47109284	1.36136	2.91823e-10
Abi1	chr2	23006347	23006747	1.35951	6.61776e-09
Vps8	chr16	21510123	21510523	1.35947	3.28449e-06
A430093F15Rik	chr19	10763337	10763737	1.35937	2.10441e-05
Pold4	chr19	4230423	4230823	1.35909	1.80034e-09
Tarbp1	chr8	126522997	126523397	1.35658	1.10896e-05
Amfr	chr8	93981742	93982142	1.35581	4.23181e-07
4930543E12Rik	chr7	113164617	113165017	1.35565	7.17143e-07
Bach1	chr16	87724754	87725154	1.35562	1.9231e-11
Wt1	chr2	105178550	105178950	1.35427	2.94062e-05
Bcor	chrX	12124441	12124841	1.35423	3.87712e-07
B230208H11Rik	chr10	12936065	12936465	1.35393	8.52005e-07
Gm49890	chr4	88928467	88928867	1.35075	3.30607e-05
Hand1	chr11	57917963	57918363	1.35027	6.07924e-05
4930483K19Rik	chr10	76557374	76557774	1.34982	3.45683e-05
Ramp1	chr1	91193282	91193682	1.34966	3.27906e-07
Adcy1	chr11	7145223	7145623	1.34933	8.99727e-06
Ncald	chr15	37607542	37607942	1.34924	1.91788e-05
Scn8a	chr15	100844304	100844704	1.3472	4.30054e-05
Pgbd5	chr8	124371660	124372060	1.34631	0.000113371
Tbc1d7	chr13	43177397	43177797	1.34473	4.42882e-12
Fbxw7	chr3	84771867	84772267	1.34469	4.70247e-12
Foxl1	chr8	121178019	121178419	1.3444	3.88124e-06
Sec14l5	chr16	5165839	5166239	1.34226	1.41893e-05
Mir222	chrX	19171843	19172243	1.34148	5.39964e-10
Mir222	chrX	19168179	19168579	1.34138	1.07534e-10
4930431P22Rik	chr14	76760473	76760873	1.34118	6.26929e-08
Fam83g	chr11	61683864	61684264	1.34056	1.70045e-05
Cwc22	chr2	77919046	77919446	1.33915	2.22784e-05
Mirg	chr12	109923424	109923824	1.3383	9.32768e-06
Dpp7	chr2	25357750	25358150	1.33745	2.15062e-09
Myo3b	chr2	70170471	70170871	1.33738	2.28922e-05
Mir6244	chr9	52107387	52107787	1.33726	5.4828e-08
Stn1	chr19	47526502	47526902	1.33679	4.02906e-08
Tm9sf4	chr2	153162878	153163278	1.33645	9.64586e-10
Hmgcs1	chr13	119710298	119710698	1.33551	1.68098e-07
Gcnt2	chr13	40971234	40971634	1.33541	2.31742e-05
Mir5626	chr9	70315413	70315813	1.33534	1.74075e-10
Cry1	chr10	85266211	85266611	1.33515	2.13114e-08
Ildr1	chr16	36709431	36709831	1.3348	2.93151e-12
Efcab15	chr11	103206152	103206552	1.33434	4.1796e-06
Oxr1	chr15	41311788	41312188	1.33427	3.38227e-07
Mir7080	chr8	123137601	123138001	1.33414	3.52212e-08
Erich3	chr3	154683629	154684029	1.33325	4.42237e-05
Tbck	chr3	132791171	132791571	1.33325	4.61461e-12
Ccl3	chr11	83655640	83656040	1.33244	1.16423e-15
Phtf1	chr3	104092743	104093143	1.33214	1.81789e-07
1700029J03Rik	chr16	93516781	93517181	1.33184	3.25153e-05
Src	chr2	157407584	157407984	1.3312	1.08036e-07
Plekhf1	chr7	38230247	38230647	1.33074	1.05706e-11
Olr1	chr6	129507059	129507459	1.33055	6.20421e-10
Tnfrsf17	chr16	11285965	11286365	1.33001	1.04016e-10
A4galt	chr15	83215791	83216191	1.32913	2.75448e-06
Adra2a	chr19	54324421	54324821	1.32905	2.84243e-05
Gm10768	chr19	43825901	43826301	1.32809	7.64563e-06
Nptx2	chr5	144636998	144637398	1.32785	4.2297e-06
Acsl1	chr8	46429828	46430228	1.32689	2.55512e-08
Ptpn1	chr2	167816990	167817390	1.32688	1.06522e-07
Epb41l1	chr2	156475374	156475774	1.3268	3.30359e-08
Mir3109	chr9	69459636	69460036	1.32603	7.9891e-09
Ksr1	chr11	79071526	79071926	1.32467	3.1123e-07
Glis1	chr4	107552733	107553133	1.32456	8.63788e-07
Zglp1	chr9	21062939	21063339	1.32356	5.61657e-08
Atp8b5	chr4	43285425	43285825	1.32319	4.92422e-05
Mb21d2	chr16	28963955	28964355	1.32277	2.25954e-08
Tpst2	chr5	112295053	112295453	1.3223	1.25414e-06
Slc24a5	chr2	125015016	125015416	1.32051	6.15084e-05
Tbx4	chr11	85952954	85953354	1.32044	6.5642e-09
Rapgef5	chr12	117566275	117566675	1.32043	1.42964e-09
Il1a	chr2	129330580	129330980	1.31983	4.34176e-10
Slc28a3	chr13	58622634	58623034	1.31976	3.05384e-06
Itpripl2	chr7	118511633	118512033	1.31932	3.89338e-06
Pgm2	chr5	64112428	64112828	1.31791	1.97292e-13
Laptm4a	chr12	8854352	8854752	1.31786	1.5115e-16
Cdh4	chr2	179514005	179514405	1.31744	9.43771e-05
Ergic1	chr17	26627300	26627700	1.31705	1.35694e-06
Ppip5k1	chr2	121316217	121316617	1.31686	2.22611e-13
Alg10b	chr15	90188928	90189328	1.3162	2.83779e-10
Smarcal1	chr1	72564504	72564904	1.31596	2.6947e-10
Mir6376	chr6	88109798	88110198	1.31508	5.20714e-07
2300009A05Rik	chr9	63468741	63469141	1.31499	4.27223e-05
Rem1	chr2	152636584	152636984	1.31403	3.1983e-17
Dusp5	chr19	53545179	53545579	1.31273	1.11039e-11
Babam2	chr5	32035731	32036131	1.3126	3.18576e-09
Cemip2	chr19	21820218	21820618	1.31259	1.74566e-07
Wwc1	chr11	35844288	35844688	1.31247	3.50972e-07
4930431P22Rik	chr14	76742304	76742704	1.31196	1.19971e-06
Usp15	chr10	123201937	123202337	1.31148	5.83337e-06
Parva	chr7	112499473	112499873	1.30979	7.53695e-05
Met	chr6	17554850	17555250	1.30968	4.12215e-05
Tec	chr5	72855738	72856138	1.30941	4.63484e-08
Tnc	chr4	64092839	64093239	1.30914	1.46247e-10
Sdk2	chr11	113939090	113939490	1.30879	2.60636e-05
Hspb7	chr4	141423229	141423629	1.30866	9.59304e-13
Wnt5b	chr6	119526534	119526934	1.30866	6.08113e-05
Jarid2	chr13	44770858	44771258	1.30789	6.96034e-09
Apbb2	chr5	66642170	66642570	1.3078	8.73021e-07
Pgm5	chr19	24824590	24824990	1.30658	3.88714e-08
Or4d11	chr19	12029169	12029569	1.30595	1.03302e-06
A530013C23Rik	chr2	167731168	167731568	1.30507	1.17264e-06
Sdk2	chr11	113952100	113952500	1.3046	2.54198e-05
Tspan3	chr9	56167971	56168371	1.30326	3.06535e-07
Defb20	chr2	152480882	152481282	1.30218	1.07333e-09
Gm11981	chr11	6695214	6695614	1.30201	1.85589e-05
Jam2	chr16	84810283	84810683	1.30158	4.65005e-09
Pigt	chr2	164513370	164513770	1.3011	2.82907e-12
Fam241b	chr10	62148377	62148777	1.30054	6.97632e-05
Zg16	chr7	127066311	127066711	1.29996	1.19337e-05
Usp47	chr7	111976389	111976789	1.29944	2.84442e-06
Col5a1	chr2	27894971	27895371	1.29943	0.000103735
Prop1	chr11	50952242	50952642	1.29918	2.74655e-05
Ebf3	chr7	137283810	137284210	1.2985	1.07876e-05
Mir3095	chr4	58402126	58402526	1.29817	2.46566e-10
Foxp1	chr6	98901223	98901623	1.29724	5.59982e-05
Bcan	chr3	87982695	87983095	1.29674	3.9815e-11
Plek2	chr12	78912080	78912480	1.29657	7.81893e-09
Ttc9	chr12	81688642	81689042	1.29612	2.27148e-06
Sik3	chr9	46110589	46110989	1.29593	2.34436e-14
Tcim	chr8	24400254	24400654	1.29551	1.27986e-07
Usp20	chr2	31036772	31037172	1.29461	5.11302e-07
Tex36	chr7	133493857	133494257	1.29434	3.80761e-06
Enpp6	chr8	47032085	47032485	1.29427	1.16359e-06
Il1rl2	chr1	40358797	40359197	1.29371	9.17015e-10
Prkce	chr17	86507648	86508048	1.29336	1.87034e-06
Fndc3a	chr14	72869306	72869706	1.293	2.76944e-10
Gm4832	chr17	88195329	88195729	1.29225	7.10833e-10
Ipo5	chr14	120895726	120896126	1.29212	7.87331e-05
Slc44a3	chr3	121548035	121548435	1.291	1.43734e-14
Nfe2l2	chr2	75688892	75689292	1.29092	5.90566e-10
Gramd1b	chr9	40449867	40450267	1.29072	7.80056e-06
Dusp1	chr17	26529879	26530279	1.29047	1.81032e-10
Tet2	chr3	133625043	133625443	1.28996	1.06191e-12
H2-Aa	chr17	34293547	34293947	1.28961	1.53617e-06
Sorcs2	chr5	36414823	36415223	1.28956	2.19584e-08
Gm13090	chr4	151089040	151089440	1.28881	3.78372e-05
Cux2	chr5	121916829	121917229	1.2857	4.54493e-05
Camk2d	chr3	126827899	126828299	1.28505	2.15657e-14
Snai3	chr8	122461552	122461952	1.28435	3.13148e-08
Otulinl	chr15	27696138	27696538	1.28415	4.47635e-05
Mettl2	chr11	105120612	105121012	1.28386	2.15076e-11
Nfkb1	chr3	135648576	135648976	1.28372	3.8154e-06
Odc1	chr12	17510227	17510627	1.28343	2.72292e-18
Rbm47	chr5	66046523	66046923	1.28301	1.33953e-09
Chic2	chr5	75046928	75047328	1.2824	7.7355e-08
Itgax	chr7	128138421	128138821	1.28162	5.29181e-07
A630023P12Rik	chr5	110503343	110503743	1.28131	5.25728e-05
Adgrg6	chr10	14385662	14386062	1.28012	3.47311e-07
Rere	chr4	150459490	150459890	1.27957	5.13646e-05
Ap1s3	chr1	79631647	79632047	1.27949	5.40918e-05
Ereg	chr5	91072168	91072568	1.2791	2.23403e-05
Gpr50	chrX	71622239	71622639	1.27882	9.77328e-05
Tmem114	chr16	8362789	8363189	1.27816	7.57319e-05
Uqcrfs1	chr13	30576893	30577293	1.27793	6.43291e-06
Thsd4	chr9	60058243	60058643	1.27714	1.39969e-06
Adtrp	chr13	41748879	41749279	1.27657	3.92029e-05
Pebp4	chr14	69911722	69912122	1.27637	7.57031e-07
B930018H19Rik	chr8	34671290	34671690	1.27574	8.26356e-11
Sik1	chr17	31927899	31928299	1.27532	3.84786e-06
Pinx1	chr14	63903962	63904362	1.27528	1.56123e-08
Fetub	chr16	22919941	22920341	1.27506	1.38681e-06
4933406D12Rik	chr2	146533480	146533880	1.27445	2.79176e-12
Prr5l	chr2	101796779	101797179	1.27416	1.9832e-09
Adam23	chr1	63413844	63414244	1.27386	4.76461e-05
Gtdc1	chr2	44920385	44920785	1.27269	2.60131e-10
App	chr16	85061719	85062119	1.27238	7.09497e-06
Klhl26	chr8	70461746	70462146	1.27196	1.88425e-07
AI606473	chr3	154412133	154412533	1.27179	2.28099e-05
Fkbp5	chr17	28515961	28516361	1.27143	7.1753e-07
Itgam	chr7	128121742	128122142	1.27137	1.2482e-05
Plb1	chr5	32196000	32196400	1.27125	2.14605e-13
Gpr85	chr6	13846003	13846403	1.27098	8.52924e-06
Flrt3	chr2	140846742	140847142	1.27085	9.2528e-05
Snapc1	chr12	73956006	73956406	1.27062	1.72983e-05
Phactr2	chr10	13304683	13305083	1.27029	1.01091e-06
Slc38a9	chr13	112671617	112672017	1.2702	4.38505e-10
Itgav	chr2	83760068	83760468	1.2701	3.31307e-05
Mir181b-1	chr1	138025501	138025901	1.26972	0.00012142
Tnfaip2	chr12	111455866	111456266	1.26966	3.33548e-15
Cldn11	chr3	31129446	31129846	1.26952	4.51732e-06
Cd47	chr16	50023368	50023768	1.26863	0.000105977
C230014O12Rik	chr2	34088825	34089225	1.26778	4.80173e-06
Zfp469	chr8	122174078	122174478	1.2675	8.44878e-13
1700034J05Rik	chr6	146960045	146960445	1.26685	3.135e-05
Fscn1	chr5	142964118	142964518	1.26653	4.77609e-10
Foxl1	chr8	121248815	121249215	1.26644	2.31402e-06
Cables1	chr18	11915580	11915980	1.26616	4.52933e-06
Mmp9	chr2	164947713	164948113	1.26572	5.76472e-06
Odf1	chr15	38197322	38197722	1.26538	4.00637e-07
Foxp1	chr6	99050608	99051008	1.26532	0.000167368
Nrxn3	chr12	88738617	88739017	1.26447	9.77317e-05
Chd7	chr4	8898045	8898445	1.26433	4.65468e-08
Gjb6	chr14	57204782	57205182	1.26327	3.41007e-05
Mrm3	chr11	76285390	76285790	1.26294	2.90441e-05
Ksr1	chr11	79059902	79060302	1.26199	1.22683e-05
1700092K14Rik	chr11	114198275	114198675	1.26126	1.70572e-06
Mir7014	chr3	95725964	95726364	1.2611	1.18991e-07
Lactb	chr9	67003079	67003479	1.26081	4.2949e-08
Il2rb	chr15	78493535	78493935	1.26065	8.41381e-05
Epc1	chr18	6419566	6419966	1.25946	6.98462e-05
Ido2	chr8	24520975	24521375	1.25882	9.00009e-12
Rbfox1	chr16	6849754	6850154	1.25766	3.02074e-06
Arhgap22	chr14	33285068	33285468	1.25728	6.10838e-09
Syn1	chrX	20914978	20915378	1.2567	1.03869e-05
Tmem132b	chr5	125639263	125639663	1.25603	6.09954e-05
Eml1	chr12	108392179	108392579	1.25583	3.05161e-05
Zfp3	chr11	70747743	70748143	1.25504	2.12724e-12
Rbm47	chr5	66165717	66166117	1.25495	7.59626e-09
Zfp821	chr8	109717787	109718187	1.25461	2.95835e-06
Hc	chr2	35023446	35023846	1.25433	2.20462e-05
Elfn1	chr5	139918498	139918898	1.25422	5.35377e-07
Ncf4	chr15	78267793	78268193	1.25347	2.38178e-06
Trim72	chr7	128024987	128025387	1.25274	1.16277e-09
Tgfbr1	chr4	47427357	47427757	1.25259	1.30632e-05
1700095J12Rik	chr4	138127413	138127813	1.25223	0.000111621
Cyp8b1	chr9	121914344	121914744	1.25203	3.598e-05
Socs3	chr11	117932262	117932662	1.2512	9.97612e-06
Gripap1	chrX	7792061	7792461	1.25111	1.24195e-06
Gm5532	chr1	155510288	155510688	1.24988	2.34121e-06
Gm4251	chr14	71230337	71230737	1.24904	7.41493e-06
Gng4	chr13	13791958	13792358	1.249	2.23115e-07
Siglecf	chr7	43343154	43343554	1.24891	9.25899e-08
Cubn	chr2	13416878	13417278	1.24844	7.64437e-12
Arhgef3	chr14	27249156	27249556	1.24808	1.86883e-06
Adtrp	chr13	41803897	41804297	1.24789	4.38181e-08
Gramd1c	chr16	44002055	44002455	1.24753	3.28511e-07
Adgrg6	chr10	14416541	14416941	1.2465	1.72394e-05
Rhoc	chr3	104790322	104790722	1.2459	1.83331e-22
Slc41a2	chr10	83152300	83152700	1.24534	2.70419e-06
Csf1	chr3	107777939	107778339	1.24487	9.74242e-07
Map3k4	chr17	12275682	12276082	1.24478	3.24299e-07
Rnf24	chr2	131386363	131386763	1.24473	7.41967e-08
Efcc1	chr6	87742816	87743216	1.24379	6.28197e-06
Mad1l1	chr5	140149360	140149760	1.2436	1.58497e-10
Polr1d	chr5	147086560	147086960	1.24293	8.03603e-07
Adra2a	chr19	54059863	54060263	1.24258	7.32817e-05
Bcor	chrX	11776431	11776831	1.24167	0.000127463
Il18	chr9	50570166	50570566	1.24162	1.67118e-05
2310008N11Rik	chr8	26813149	26813549	1.24155	2.06895e-08
Trpm8	chr1	88345503	88345903	1.24053	8.42158e-05
Slc9a3r2	chr17	24645464	24645864	1.24001	1.46717e-06
Egr2	chr10	67512196	67512596	1.23948	2.34252e-05
Zfp280d	chr9	72270180	72270580	1.23947	8.13723e-09
Foxj3	chr4	119546438	119546838	1.23924	1.78997e-06
Spata13	chr14	60530275	60530675	1.23867	5.50381e-05
Il1f10	chr2	24304558	24304958	1.23863	5.76519e-08
Il1a	chr2	129320021	129320421	1.2383	8.24307e-14
Zcwpw1	chr5	137817480	137817880	1.2377	1.73004e-05
Pde6a	chr18	61324062	61324462	1.23639	2.21126e-09
Dlgap1	chr17	70799282	70799682	1.23621	1.68872e-09
Fermt2	chr14	45492036	45492436	1.23485	8.6648e-06
Dst	chr1	33926831	33927231	1.23414	2.36186e-05
Nwd1	chr8	72642901	72643301	1.23308	1.17436e-10
Olfm2	chr9	20760734	20761134	1.23278	3.5886e-07
Fgd2	chr17	29394118	29394518	1.23246	3.26183e-16
Twist2	chr1	91816651	91817051	1.2322	0.000172356
Stard10	chr7	101343122	101343522	1.23128	4.96598e-10
Pfkp	chr13	6618700	6619100	1.23073	3.95318e-05
1700011L22Rik	chr8	79243468	79243868	1.23044	2.89915e-07
Cdyl2	chr8	116619907	116620307	1.23022	1.2728e-08
Cd180	chr13	102579707	102580107	1.23021	4.67624e-05
E030018B13Rik	chr7	63916954	63917354	1.23008	5.89912e-06
Plcl2	chr17	50582700	50583100	1.22958	6.55942e-05
4930563J15Rik	chr10	67648095	67648495	1.22913	8.55708e-07
Sv2a	chr3	96190320	96190720	1.22876	2.01512e-09
1700064M15Rik	chr12	99688075	99688475	1.22826	5.14541e-08
Cotl1	chr8	119850568	119850968	1.22824	6.70391e-06
Qrfpr	chr3	36284000	36284400	1.22822	0.000115504
Snx27	chr3	94565501	94565901	1.22744	6.12318e-09
Zc3h12c	chr9	52190931	52191331	1.22723	4.83913e-06
Klf6	chr13	6193595	6193995	1.22691	4.70369e-06
Adamts17	chr7	67114036	67114436	1.22606	0.000167729
Vcam1	chr3	116189429	116189829	1.226	1.46922e-07
Otud7b	chr3	96087220	96087620	1.2254	8.58743e-10
Prrc1	chr18	57255052	57255452	1.22422	4.21464e-05
Abca4	chr3	122130754	122131154	1.2241	5.25156e-06
Mr1	chr1	155121650	155122050	1.22393	0.000124013
Scn1b	chr7	31126916	31127316	1.22381	2.54726e-09
Pnoc	chr14	65414365	65414765	1.2237	4.43293e-06
Reep3	chr10	67042158	67042558	1.22246	1.7863e-05
Gm19510	chr15	59737210	59737610	1.22209	1.6507e-08
Dennd1b	chr1	138939703	138940103	1.22129	3.86438e-06
Dbpht2	chr12	74378119	74378519	1.22112	7.5376e-05
Slc3a2	chr19	8711938	8712338	1.22027	9.39516e-10
Sirt4	chr5	115491808	115492208	1.21961	4.23031e-13
Map3k19	chr1	127860482	127860882	1.21953	2.77634e-05
D730050B12Rik	chr13	72831459	72831859	1.21948	3.58041e-05
Olfml3	chr3	103680264	103680664	1.21926	1.01116e-07
St18	chr1	6476472	6476872	1.21872	3.89453e-07
Ube2e2	chr14	18529967	18530367	1.21865	0.00012949
Zfp827	chr8	79139602	79140002	1.21686	3.34148e-10
Serinc2	chr4	130273561	130273961	1.21661	1.16347e-08
Prdx4	chrX	155378022	155378422	1.21611	5.69117e-05
Ppp2r5c	chr12	110389459	110389859	1.21555	4.84663e-07
Ablim3	chr18	61921457	61921857	1.21533	2.44355e-05
A330074K22Rik	chr8	120227198	120227598	1.2149	1.01604e-07
Gabbr2	chr4	46885837	46886237	1.2146	3.31359e-06
Gm20125	chr10	17012479	17012879	1.21457	7.19375e-06
4933411E08Rik	chr10	117976376	117976776	1.21419	2.49899e-05
Malt1	chr18	65440088	65440488	1.21351	3.32322e-06
Scara3	chr14	65900699	65901099	1.21346	2.58852e-09
Abcc1	chr16	14490684	14491084	1.2127	2.65411e-05
4933440M02Rik	chr7	125124707	125125107	1.21265	0.000100064
Trpm6	chr19	18746622	18747022	1.21259	6.07868e-09
Rmi2	chr16	10857496	10857896	1.21258	6.63689e-05
Gfod1	chr13	43268975	43269375	1.21236	1.75395e-13
Gphb5	chr12	75425868	75426268	1.21081	0.000129072
Bcr	chr10	75121043	75121443	1.21078	1.38104e-06
Dlgap4	chr2	156682973	156683373	1.21036	1.02732e-08
Daglb	chr5	143445704	143446104	1.2086	9.00758e-05
Lamc2	chr1	153129965	153130365	1.20831	2.41622e-07
Tmem130	chr5	144701744	144702144	1.20808	0.00021756
Dusp8	chr7	142088868	142089268	1.20677	4.9783e-07
Schip1	chr3	68608848	68609248	1.20533	1.78558e-06
Tmem119	chr5	113805321	113805721	1.20515	5.82581e-08
Hivep3	chr4	119991731	119992131	1.20494	5.36587e-07
Ankrd55	chr13	112318149	112318549	1.20329	3.01612e-11
Sult2b1	chr7	45742416	45742816	1.20231	5.93906e-11
Vmn2r90	chr17	17700299	17700699	1.20175	5.00873e-05
Gpalpp1	chr14	76099539	76099939	1.2011	1.17779e-09
Schip1	chr3	68508603	68509003	1.20098	4.70593e-07
Dok5	chr2	171342805	171343205	1.20093	6.99849e-06
Errfi1	chr4	150817560	150817960	1.2009	8.96526e-05
Dnm3	chr1	162165011	162165411	1.20072	3.8475e-05
Kdm7a	chr6	39226028	39226428	1.19969	2.76267e-10
Upp2	chr2	58589564	58589964	1.1995	4.46259e-09
Dip2c	chr13	9239523	9239923	1.19932	5.70475e-14
Tyw3	chr3	154573671	154574071	1.19901	1.19012e-05
Evl	chr12	108639122	108639522	1.19848	2.27098e-08
Scube3	chr17	28117545	28117945	1.19833	7.38922e-05
Cmip	chr8	117285071	117285471	1.19809	4.85436e-07
Mef2c	chr13	83539863	83540263	1.19806	1.29476e-08
Mir3089	chr2	30743229	30743629	1.19796	8.46052e-06
Apol6	chr15	77055708	77056108	1.19699	7.61229e-05
Thbs2	chr17	14718752	14719152	1.19685	3.748e-05
Cd47	chr16	50063466	50063866	1.1953	1.84659e-05
Bcl2l11	chr2	128060902	128061302	1.19502	1.6075e-08
Litaf	chr16	10957372	10957772	1.19398	5.57101e-06
Slc7a1	chr5	148342370	148342770	1.19318	6.34078e-09
Ocstamp	chr2	165396210	165396610	1.19221	2.66728e-06
Ppp2r3a	chr9	101228875	101229275	1.19213	1.04115e-06
Eml1	chr12	108396036	108396436	1.19151	0.000114322
4930488B22Rik	chr1	184650726	184651126	1.19115	4.81875e-05
Rptor	chr11	119640031	119640431	1.19033	1.44314e-05
Dspp	chr5	104177089	104177489	1.19024	2.77879e-05
Gm13710	chr2	84557204	84557604	1.18981	6.44415e-05
Nos1	chr5	117659457	117659857	1.1898	0.000141032
Nfil3	chr13	53017950	53018350	1.18956	6.49462e-05
9530059O14Rik	chr9	122603051	122603451	1.18943	2.45964e-05
Lypd2	chr15	74737925	74738325	1.18937	4.05666e-05
Tcp11	chr17	28069473	28069873	1.18901	3.98288e-05
Cd6	chr19	10831845	10832245	1.18887	6.96572e-12
Npepps	chr11	97272831	97273231	1.18832	4.63004e-05
Axl	chr7	25781527	25781927	1.18821	1.38893e-11
Cxxc5	chr18	35854438	35854838	1.18745	3.64003e-07
Cd44	chr2	102981413	102981813	1.1873	9.78938e-10
Fscb	chr12	63975591	63975991	1.18704	9.23779e-08
Mas1	chr17	12853696	12854096	1.18685	3.27302e-07
Gipc2	chr3	152032574	152032974	1.18669	5.33573e-05
Mir21a	chr11	86582363	86582763	1.18642	7.49126e-16
AI839979	chr5	31569008	31569408	1.18615	3.20447e-11
Sgce	chr6	4708974	4709374	1.18611	1.77495e-07
Kif2a	chr13	107003207	107003607	1.18569	4.04757e-07
Pla2g7	chr17	43567635	43568035	1.18544	1.12582e-07
1700086L19Rik	chr12	74238810	74239210	1.18407	2.8969e-09
Dnase2a	chr8	84909933	84910333	1.18367	6.42257e-08
4930431P22Rik	chr14	76761660	76762060	1.18316	1.41426e-07
Tnip1	chr11	54934158	54934558	1.1828	1.97808e-14
Pinx1	chr14	63905702	63906102	1.18255	5.39278e-06
A930001A20Rik	chr3	15139558	15139958	1.18213	5.0138e-08
Htra1	chr7	130955142	130955542	1.18193	0.000171211
Noct	chr3	51197149	51197549	1.18178	4.52107e-16
Cuedc1	chr11	88105831	88106231	1.1816	1.13295e-06
Btg2	chr1	134074213	134074613	1.1814	3.20043e-07
Rsbn1	chr3	103908777	103909177	1.18087	2.97217e-08
Sqstm1	chr11	50198285	50198685	1.17955	1.91356e-06
Or2c1	chr16	3807872	3808272	1.17932	0.000115779
Tshz1	chr18	83895168	83895568	1.17912	9.94189e-05
Kremen1	chr11	5272233	5272633	1.17859	1.50663e-05
Rab31	chr17	65740220	65740620	1.17823	1.22346e-12
Pde4b	chr4	102617328	102617728	1.17764	1.76658e-05
Pah	chr10	87678990	87679390	1.17759	2.08245e-09
Cacng6	chr7	3451175	3451575	1.17595	1.1382e-09
Trip11	chr12	101892777	101893177	1.17579	3.93008e-05
Il27	chr7	126603732	126604132	1.17485	1.25734e-06
Celsr1	chr15	86016074	86016474	1.17441	9.90081e-05
Ccr5	chr9	124146299	124146699	1.17356	2.92671e-13
Gm4832	chr17	88178884	88179284	1.1735	0.000233078
Camk2b	chr11	6018571	6018971	1.17349	0.000102429
Il6	chr5	29950863	29951263	1.17337	4.18968e-05
Fnbp1	chr2	31042893	31043293	1.17244	3.42499e-05
Tsc22d2	chr3	58372414	58372814	1.17118	3.73224e-07
Rbm48	chr5	3586779	3587179	1.17088	1.37384e-05
Ccl5	chr11	83534637	83535037	1.17065	1.69496e-08
Mob4	chr1	55123027	55123427	1.17046	6.12537e-05
Batf3	chr1	191102900	191103300	1.17018	2.54924e-05
4930563J15Rik	chr10	67651529	67651929	1.16992	3.85859e-07
D630003M21Rik	chr2	158233051	158233451	1.16981	1.12571e-05
Pdgfrb	chr18	61044775	61045175	1.16981	2.70072e-05
2010001A14Rik	chr11	57789822	57790222	1.16935	7.37519e-05
Alcam	chr16	52292618	52293018	1.16924	6.78901e-08
Dusp4	chr8	34760560	34760960	1.16905	1.1582e-10
Ylpm1	chr12	85051170	85051570	1.16865	4.09911e-07
Rtn4rl2	chr2	84882584	84882984	1.16784	7.38033e-09
Dlgap2	chr8	14468161	14468561	1.16764	5.92423e-08
Meis3	chr7	16168719	16169119	1.16764	0.000109642
4930534H03Rik	chr10	91325535	91325935	1.16699	4.65614e-06
Utrn	chr10	12298771	12299171	1.16694	8.3244e-06
Ccl4	chr11	83657387	83657787	1.16657	4.73368e-10
Nek2	chr1	191802339	191802739	1.16654	6.48661e-06
4930563J15Rik	chr10	67633148	67633548	1.16647	1.1925e-05
Vmp1	chr11	86624184	86624584	1.16609	4.5486e-15
Dyrk1a	chr16	94586208	94586608	1.16524	6.67699e-06
Myo10	chr15	25576026	25576426	1.16512	2.2392e-06
Laptm4a	chr12	8847984	8848384	1.16494	4.27813e-05
Ereg	chr5	91083077	91083477	1.16379	1.15913e-07
Fbxo15	chr18	84957403	84957803	1.16338	1.40665e-08
Col23a1	chr11	51404911	51405311	1.1631	3.74268e-05
Blm	chr7	80457258	80457658	1.16279	8.26085e-06
Met	chr6	17408077	17408477	1.1622	1.20321e-06
Sik3	chr9	46033003	46033403	1.1613	3.23558e-06
Polm	chr11	5835045	5835445	1.16113	1.36291e-08
Olfml3	chr3	103683077	103683477	1.16099	9.48537e-07
Aldh1a3	chr7	66477512	66477912	1.16072	4.46328e-06
Klhdc8a	chr1	132264603	132265003	1.15907	1.19713e-08
Ehd4	chr2	120116852	120117252	1.15877	7.20164e-05
Prkag2	chr5	24859812	24860212	1.15794	4.15563e-06
Acsl4	chrX	142336676	142337076	1.15775	0.000211266
Pde8a	chr7	81319702	81320102	1.1577	5.49593e-06
2410022M11Rik	chr14	56830740	56831140	1.15764	0.000179129
H2bl1	chr13	98975490	98975890	1.15531	2.10595e-05
Fnbp1l	chr3	122574940	122575340	1.15445	7.54007e-15
Acte1	chr7	143865358	143865758	1.15389	7.58182e-05
Tmem132a	chr19	10860132	10860532	1.15297	2.1586e-05
Tmem179	chr12	112516881	112517281	1.15252	2.36604e-09
Glis1	chr4	107553696	107554096	1.15224	3.05107e-07
D330050G23Rik	chr2	116942370	116942770	1.15208	6.89959e-11
Bcl2l11	chr2	128054978	128055378	1.1514	7.17393e-09
Rnf145	chr11	44504207	44504607	1.15019	1.42922e-10
Mc3r	chr2	172283361	172283761	1.14848	8.85664e-05
Scn10a	chr9	119641946	119642346	1.14839	6.17208e-05
Fndc7	chr3	108863095	108863495	1.14812	9.27335e-09
Gm12724	chr4	106195662	106196062	1.14792	1.2425e-05
Lilrb4a	chr10	51497036	51497436	1.1479	1.12768e-08
Ctsb	chr14	63148555	63148955	1.14778	4.91649e-06
Tm2d3	chr7	65714322	65714722	1.1475	1.7269e-07
Sh3bp5	chr14	31400998	31401398	1.14691	1.17478e-07
Flt1	chr5	147765860	147766260	1.14627	2.9083e-05
Rnf115	chr3	96737344	96737744	1.14539	3.92533e-07
Pou2f2	chr7	25130463	25130863	1.14515	5.30575e-07
Hs6st1	chr1	35903995	35904395	1.14451	0.000148968
Pepd	chr7	34910411	34910811	1.14445	1.40389e-05
Nfil3	chr13	52976669	52977069	1.14438	1.55444e-10
Sik3	chr9	46083482	46083882	1.14426	1.71337e-12
Atxn1	chr13	45850232	45850632	1.14367	3.95367e-07
Gm17745	chr10	93343487	93343887	1.14349	9.25994e-09
Insl6	chr19	29292470	29292870	1.14328	2.86687e-05
Atl1	chr12	69885155	69885555	1.14238	6.50665e-05
Rorc	chr3	94379960	94380360	1.14233	4.78275e-08
E230016K23Rik	chr11	83580839	83581239	1.14184	1.54275e-08
Socs2	chr10	95388884	95389284	1.14182	3.94016e-06
Flt1	chr5	147759972	147760372	1.14074	1.79639e-06
Dlgap4	chr2	156681669	156682069	1.14016	1.26265e-05
Mir684-1	chr2	80623948	80624348	1.13978	5.87371e-05
Cdk18	chr1	132135631	132136031	1.13977	6.68137e-10
Sugct	chr13	17627096	17627496	1.13943	1.32766e-05
Pou2f2	chr7	25109335	25109735	1.13912	4.29764e-06
Rgs3	chr4	62679153	62679553	1.13899	8.10589e-11
9530068E07Rik	chr11	52537168	52537568	1.13879	7.47852e-05
Il31ra	chr13	112551610	112552010	1.13873	0.000124538
Hopx	chr5	77092431	77092831	1.13828	7.83327e-05
Sulf2	chr2	166115958	166116358	1.13782	0.000132446
Pmvk	chr3	89468276	89468676	1.13781	6.51017e-07
Ipo11	chr13	106884294	106884694	1.13778	7.84415e-05
Rock2	chr12	16900760	16901160	1.13717	4.27273e-06
Gm29811	chr3	132890954	132891354	1.13643	1.6811e-09
Cacna1b	chr2	24757128	24757528	1.13626	4.52502e-07
Pde4d	chr13	109204532	109204932	1.13613	7.10332e-06
Abr	chr11	76589115	76589515	1.13457	8.48045e-10
1700109K24Rik	chr15	77068967	77069367	1.13258	1.77759e-06
Hpcal1	chr12	17688799	17689199	1.13253	3.80974e-07
Rbfox1	chr16	6827329	6827729	1.1323	8.61003e-09
Igfbp6	chr15	102145401	102145801	1.13104	1.49188e-05
Rap2b	chr3	61344072	61344472	1.13094	8.7861e-12
Ccr1	chr9	123936637	123937037	1.13051	6.53169e-06
0610040F04Rik	chr6	108672084	108672484	1.12961	6.75361e-06
4933432I03Rik	chr14	103029229	103029629	1.12961	8.84342e-10
Lyzl4os	chr9	121570038	121570438	1.12882	3.1395e-05
Smg6	chr11	74992548	74992948	1.12873	7.30414e-05
Exoc4	chr6	33866890	33867290	1.1286	4.22312e-05
Tmem241	chr18	11999603	12000003	1.12837	2.01926e-05
Clec4e	chr6	123279842	123280242	1.12822	2.48405e-05
Mettl21a	chr1	64601339	64601739	1.1281	1.01292e-06
Rhou	chr8	123692119	123692519	1.12782	7.43575e-05
Celf4	chr18	25510891	25511291	1.12746	0.000126111
Stk33	chr7	109456583	109456983	1.12723	8.94876e-07
Gm29811	chr3	132865109	132865509	1.12654	3.87767e-07
Adora2a	chr10	75318244	75318644	1.12617	4.94528e-05
Acvr1	chr2	58546310	58546710	1.12598	1.40977e-06
Tpbg	chr9	85986275	85986675	1.12558	7.09108e-05
Pik3cd	chr4	149689883	149690283	1.12537	1.17131e-07
Lclat1	chr17	73251154	73251554	1.12505	3.36528e-06
Cldn18	chr9	99720023	99720423	1.12251	4.04913e-05
Tle3	chr9	61337073	61337473	1.12241	0.000137047
Bmerb1	chr16	13969142	13969542	1.12234	0.00030489
Pibf1	chr14	99205843	99206243	1.12225	6.70636e-05
Atp8a1	chr5	67643517	67643917	1.12214	8.96715e-08
Osbpl8	chr10	111257372	111257772	1.1218	6.38747e-08
Eea1	chr10	95923839	95924239	1.12093	0.000167057
Icosl	chr10	78079860	78080260	1.12024	8.32573e-05
2810405F15Rik	chr2	116417720	116418120	1.12006	3.10713e-08
Slc16a10	chr10	40107853	40108253	1.11958	8.39024e-06
Clstn1	chr4	149632688	149633088	1.11922	8.24159e-06
Hpn	chr7	31100817	31101217	1.11856	1.06853e-06
Diras2	chr13	52445585	52445985	1.11807	8.25576e-05
Trps1	chr15	50772599	50772999	1.11776	5.48659e-05
F11	chr8	45255009	45255409	1.11758	4.9237e-08
Slc66a2	chr18	80250379	80250779	1.11666	5.69109e-06
Cadm1	chr9	47426730	47427130	1.11637	0.00027047
Fer	chr17	64093742	64094142	1.11633	6.72706e-05
Baiap2	chr11	119975874	119976274	1.11622	1.85606e-09
Asb15	chr6	24549864	24550264	1.11605	0.000262321
Dnase2b	chr3	146607261	146607661	1.11485	6.69409e-05
Pik3cg	chr12	32146617	32147017	1.11467	1.45173e-06
Smc3	chr19	53567842	53568242	1.11426	2.75701e-11
Bms1	chr6	118367478	118367878	1.11425	2.82e-05
Prkcb	chr7	122415398	122415798	1.1138	0.00012421
Msi2	chr11	88589570	88589970	1.11357	7.90454e-05
Rgs9	chr11	109264415	109264815	1.11258	2.38988e-06
Gripap1	chrX	7801989	7802389	1.11226	6.86586e-05
Sik3	chr9	46176644	46177044	1.11151	3.17551e-05
Xrcc2	chr5	25713181	25713581	1.1115	0.000188684
Haao	chr17	83821919	83822319	1.11146	0.000100597
Slc45a1	chr4	150694556	150694956	1.11084	1.19634e-06
Ubiad1	chr4	148386042	148386442	1.11081	0.000100741
Rab18	chr18	6700953	6701353	1.1105	9.04339e-05
Afap1l2	chr19	57013294	57013694	1.11005	8.83228e-07
Spp1	chr5	104392732	104393132	1.1098	8.30482e-08
Rasgef1b	chr5	99608838	99609238	1.1095	7.2647e-06
Trio	chr15	28081102	28081502	1.10869	2.58782e-05
Ikzf1	chr11	11656465	11656865	1.10818	5.06576e-05
Osm	chr11	4240160	4240560	1.10815	4.3613e-08
Cep350	chr1	155844263	155844663	1.10814	1.34552e-06
Wscd2	chr5	113591866	113592266	1.1076	3.82648e-09
Liph	chr16	21976218	21976618	1.1074	9.1136e-05
Timmdc1	chr16	38503512	38503912	1.10711	0.000120302
Myrf	chr19	10228815	10229215	1.10698	3.35815e-05
Pla1a	chr16	38403622	38404022	1.10694	7.04549e-09
Rnf157	chr11	116406333	116406733	1.1066	2.62057e-11
Stk31	chr6	49523730	49524130	1.10608	6.56454e-05
Bid	chr6	120922111	120922511	1.10559	3.1423e-05
Cd80	chr16	38458561	38458961	1.10552	5.04756e-07
Stk3	chr15	35076977	35077377	1.10537	0.00029791
Hs6st1	chr1	36073136	36073536	1.10518	6.59728e-08
Macf1	chr4	123373586	123373986	1.10495	0.000130678
Inpp5f	chr7	128672026	128672426	1.10487	1.97306e-11
Gse1	chr8	120228207	120228607	1.10477	1.42766e-07
Errfi1	chr4	150837451	150837851	1.10465	4.71779e-11
Map1a	chr2	121294123	121294523	1.10439	1.08402e-07
Vcl	chr14	20903139	20903539	1.10399	0.00015846
Efnb2	chr8	8452179	8452579	1.10372	1.45212e-05
Padi2	chr4	140947982	140948382	1.1034	6.43316e-07
2310043O21Rik	chr15	38572606	38573006	1.10292	1.37976e-06
Marchf10	chr11	105409587	105409987	1.1026	0.000340516
Mir5118	chr16	55572662	55573062	1.10225	0.000169427
Morrbid	chr2	128467340	128467740	1.09867	6.74793e-07
Hilpda	chr6	29247131	29247531	1.09861	6.76635e-05
Shank1	chr7	44311259	44311659	1.09845	2.10648e-05
Fank1	chr7	133793553	133793953	1.09826	1.16882e-07
Syt16	chr12	74093111	74093511	1.0978	9.27319e-06
Nav2	chr7	49299574	49299974	1.09673	1.34689e-05
Rab11fip1	chr8	27172439	27172839	1.09638	3.0882e-08
4930556L07Rik	chr2	151788600	151789000	1.09624	0.000327157
Vmp1	chr11	86618560	86618960	1.09581	2.33899e-05
Igf2bp2	chr16	22108115	22108515	1.09466	1.52043e-10
Commd9	chr2	101908758	101909158	1.0943	7.46913e-06
Prune2	chr19	16959522	16959922	1.09429	2.06775e-05
4933433G19Rik	chr13	67026093	67026493	1.09422	0.000358094
Hilpda	chr6	29245747	29246147	1.09408	1.29189e-05
Grap	chr11	61644531	61644931	1.0928	7.11374e-06
Mir3970	chr19	33160014	33160414	1.09259	1.41524e-05
Syt6	chr3	103600947	103601347	1.09251	9.46395e-15
Utrn	chr10	12601146	12601546	1.09193	0.000337664
Snai1	chr2	167552921	167553321	1.0919	3.64781e-06
Itga5	chr15	103378263	103378663	1.09188	6.20146e-06
Trerf1	chr17	47272886	47273286	1.0918	8.04101e-07
BB123696	chr13	52701991	52702391	1.09117	0.000163884
Usp15	chr10	123190019	123190419	1.09099	1.28208e-06
Pdzd2	chr15	12425137	12425537	1.09001	5.17871e-07
Sqstm1	chr11	50197579	50197979	1.08983	5.54404e-06
Ets2	chr16	95769760	95770160	1.08866	3.20822e-05
Med13l	chr5	118465002	118465402	1.08799	4.96389e-06
Ankrd28	chr14	31786518	31786918	1.08783	1.21453e-06
Cemip	chr7	84100684	84101084	1.08754	2.90053e-06
Maf	chr8	115529840	115530240	1.08666	3.28509e-05
Kank1	chr19	25428326	25428726	1.08635	4.82119e-05
Gm19410	chr8	35728210	35728610	1.08556	5.61866e-06
B930018H19Rik	chr8	34636327	34636727	1.08535	0.000190381
Ell2	chr13	75778102	75778502	1.08534	1.35332e-07
4930447F24Rik	chr9	108137524	108137924	1.08445	2.48799e-05
Insr	chr8	3299326	3299726	1.08441	0.000269736
Gfod1	chr13	43297729	43298129	1.0844	2.36198e-06
Gfpt2	chr11	49811161	49811561	1.0843	3.56892e-09
Qpct	chr17	79099897	79100297	1.08383	2.11853e-11
Cfap69	chr5	5648814	5649214	1.08318	9.14325e-06
Tafa2	chr10	123348850	123349250	1.08276	5.51768e-06
Trpv4	chr5	114616305	114616705	1.08259	6.85781e-05
0610038B21Rik	chr8	77481974	77482374	1.08257	7.16423e-06
Smim15	chr13	107967988	107968388	1.08158	5.34748e-05
Myo1e	chr9	70237480	70237880	1.08157	1.04772e-06
Fah	chr7	84597344	84597744	1.08142	9.47022e-05
Zfp131	chr13	119780076	119780476	1.0812	8.53285e-05
Timp3	chr10	86250950	86251350	1.08101	0.000372658
Tmcc3	chr10	94545591	94545991	1.08089	1.21191e-08
Pde4b	chr4	102608007	102608407	1.08065	7.39151e-11
Ednra	chr8	77737319	77737719	1.07992	8.65467e-06
1700063H04Rik	chr6	122387570	122387970	1.07962	3.41059e-05
Klf9	chr19	22979097	22979497	1.07881	2.82631e-05
Osbpl10	chr9	115067207	115067607	1.07857	9.43e-05
Snorc	chr1	87459920	87460320	1.07847	1.93815e-06
Glg1	chr8	111229020	111229420	1.07779	3.13138e-05
Foxn3	chr12	99380734	99381134	1.0772	1.66545e-07
Ren2	chr1	133347868	133348268	1.07711	0.000109752
St3gal3	chr4	117980216	117980616	1.07647	5.85182e-08
Pde4d	chr13	109175302	109175702	1.07635	0.000147515
Mir21c	chr8	128164928	128165328	1.07614	2.14198e-05
Tec	chr5	72844245	72844645	1.07608	1.59453e-07
Sdc4	chr2	164432987	164433387	1.07561	2.33609e-06
Mir181b-1	chr1	138009468	138009868	1.07531	7.36304e-07
Tnc	chr4	64124461	64124861	1.07519	0.000220354
Pvt1	chr15	62301060	62301460	1.07501	0.00013286
Ppl	chr16	5134748	5135148	1.07487	1.4253e-06
Plat	chr8	22742697	22743097	1.0747	0.000128441
Kdm1a	chr4	136570005	136570405	1.07421	4.09162e-06
Lims1	chr10	58370148	58370548	1.07408	8.12619e-07
Kif5b	chr18	6285902	6286302	1.07394	4.60205e-05
Abr	chr11	76562140	76562540	1.07332	1.37422e-10
Epn2	chr11	61597747	61598147	1.07315	7.59854e-05
Mroh4	chr15	74617362	74617762	1.0727	7.92723e-06
Vwa8	chr14	79141704	79142104	1.0722	1.2011e-05
Ddx1	chr12	13177611	13178011	1.07202	2.33239e-05
Zfp90	chr8	106387787	106388187	1.07158	2.26338e-08
Dusp26	chr8	31087232	31087632	1.07099	0.00033143
2610035D17Rik	chr11	113032487	113032887	1.07095	6.54348e-05
Ldlr	chr9	21729320	21729720	1.07011	5.46139e-09
Rab11fip4os1	chr11	79610984	79611384	1.06901	4.33806e-11
Oser1	chr2	163413248	163413648	1.06892	2.36547e-06
Ccdc182	chr11	88291325	88291725	1.0688	2.36612e-09
Tmco3	chr8	13293632	13294032	1.06843	3.24454e-09
Prkcq	chr2	11211949	11212349	1.06745	0.000283582
Ckap5	chr2	91508171	91508571	1.06734	9.99901e-10
Smyd1	chr6	71250895	71251295	1.06723	4.6721e-06
Hs6st1	chr1	35759664	35760064	1.06703	1.54903e-06
Mir5127	chr18	81838975	81839375	1.06688	0.000149048
Gm19510	chr15	59799372	59799772	1.06652	7.08759e-07
Hcls1	chr16	36941180	36941580	1.06631	1.10529e-08
Stum	chr1	180507386	180507786	1.06571	3.27236e-08
Plekha1	chr7	130839404	130839804	1.06542	4.12644e-05
Peak1	chr9	56370703	56371103	1.0647	7.71781e-07
Fmnl2	chr2	52938292	52938692	1.06411	0.000142471
Tnc	chr4	64083942	64084342	1.06379	2.06512e-07
Lpar1	chr4	58470058	58470458	1.06378	9.13665e-12
Uts2	chr4	150991263	150991663	1.0636	0.000118628
Il6st	chr13	112430510	112430910	1.06304	0.000310926
Mapk11	chr15	89147042	89147442	1.063	1.67802e-06
Gse1	chr8	120332743	120333143	1.06285	7.59456e-09
Nucb2	chr7	116483933	116484333	1.06282	4.98317e-05
Galnt7	chr8	57594126	57594526	1.06242	1.00321e-08
Grhl1	chr12	24593183	24593583	1.06203	2.02817e-10
Pth	chr7	113419386	113419786	1.06159	0.000230099
E230016K23Rik	chr11	83628780	83629180	1.06089	0.000162039
Spaca6	chr17	17845394	17845794	1.06084	6.93394e-09
Marcks	chr10	37145480	37145880	1.06072	0.000563824
Dact2	chr17	14115674	14116074	1.0607	6.46367e-05
Cth	chr3	157884016	157884416	1.06041	2.99506e-07
Garin1a	chr6	29299128	29299528	1.0604	7.94195e-05
Coro2b	chr9	62509238	62509638	1.06006	0.000377486
B3gntl1	chr11	121655150	121655550	1.05984	0.000122136
Pde8a	chr7	81184133	81184533	1.05975	0.000129483
Gm4832	chr17	88113328	88113728	1.0591	4.73964e-15
Aqp3	chr4	41094363	41094763	1.05902	4.91481e-05
Tdrp	chr8	13955537	13955937	1.05897	0.000190464
D430036J16Rik	chr9	81550361	81550761	1.05882	1.39648e-05
Unc80	chr1	66649650	66650050	1.05803	4.98915e-12
Plcl1	chr1	55666158	55666558	1.05788	0.000270212
Fjx1	chr2	102451570	102451970	1.05776	3.67085e-07
Hid1	chr11	115374035	115374435	1.05731	1.91298e-06
Osbpl7	chr11	97083534	97083934	1.05713	6.79712e-09
Gfod1	chr13	43286865	43287265	1.05708	2.21293e-07
Sowahd	chrX	37063870	37064270	1.05706	3.79855e-05
Mtss1	chr15	59158836	59159236	1.05706	0.00025044
Cacna1c	chr6	118839570	118839970	1.057	0.00027433
Chst1	chr2	92627590	92627990	1.05698	9.14736e-05
Med23	chr10	24884331	24884731	1.05688	0.000265151
Nrbf2	chr10	67365250	67365650	1.05679	0.000175509
Apon	chr10	128256344	128256744	1.05648	5.40924e-06
Slc6a4	chr11	77011776	77012176	1.05627	0.000101011
1700064M15Rik	chr12	99689235	99689635	1.05626	1.84193e-05
Rybp	chr6	100071991	100072391	1.05614	0.000415071
Ptprc	chr1	138180044	138180444	1.05591	2.20346e-05
1700024I08Rik	chr13	63642595	63642995	1.05539	2.38513e-06
Gtf2ird1	chr5	134437460	134437860	1.0546	2.43652e-05
Bag3	chr7	128554547	128554947	1.05457	1.11197e-10
Clca2	chr3	145072373	145072773	1.05439	0.000324213
Hipk2	chr6	38829426	38829826	1.05426	8.55636e-05
Irf4	chr13	30769202	30769602	1.05373	1.17298e-07
Rfx4	chr10	84701093	84701493	1.05337	0.000351298
Exo1	chr1	175826984	175827384	1.05333	0.000399209
Ifnk	chr4	35061011	35061411	1.05328	7.85135e-07
Map2k6	chr11	110511477	110511877	1.05303	3.69866e-07
Myo3b	chr2	70182192	70182592	1.05279	7.48909e-07
Rplp1	chr9	61892994	61893394	1.0521	0.000405037
Dars	chr1	128399064	128399464	1.05197	1.22934e-06
Rasgrf1	chr9	89872151	89872551	1.05178	1.77745e-10
Rasa1	chr13	85418663	85419063	1.05152	6.77129e-06
Mir155hg	chr16	84621327	84621727	1.0515	1.88912e-11
Slc25a26	chr6	94551568	94551968	1.05098	0.000237171
Irf2bp2	chr8	126686804	126687204	1.05098	1.23017e-05
Fhdc1	chr3	84450628	84451028	1.05047	3.22334e-05
Pvt1	chr15	62453348	62453748	1.05031	0.000141008
Bdkrb2	chr12	105543740	105544140	1.05011	2.89841e-05
Tes	chr6	17053060	17053460	1.04958	9.59637e-06
Ipo5	chr14	120926026	120926426	1.04826	7.61731e-05
Pla1a	chr16	38406774	38407174	1.04804	3.68708e-06
Stc1	chr14	69089153	69089553	1.0479	1.84173e-09
Ube2v1	chr2	167574814	167575214	1.04702	1.05351e-06
Dact1	chr12	71332107	71332507	1.04665	6.96432e-05
Mdm1	chr10	118172385	118172785	1.04635	2.67634e-07
Jade2	chr11	51843080	51843480	1.0461	8.64098e-05
Sh3bgr	chr16	96210994	96211394	1.04604	0.000223724
Camta1	chr4	151339473	151339873	1.04588	0.000196759
Rassf8	chr6	145725795	145726195	1.04495	1.34211e-07
Pmaip1	chr18	66428645	66429045	1.04489	0.000134749
Irf2bp2	chr8	126695481	126695881	1.04472	9.68443e-05
Baiap2	chr11	119989045	119989445	1.04461	1.47887e-07
Hes1	chr16	30070161	30070561	1.0442	3.44119e-07
Atxn1	chr13	45867165	45867565	1.04384	2.12293e-05
Samd13	chr3	146676198	146676598	1.0437	0.000107823
Flrt2	chr12	95748774	95749174	1.04349	4.97191e-10
Gfod1	chr13	43276124	43276524	1.04295	0.000231413
Smox	chr2	131484203	131484603	1.0429	4.01812e-05
Plbd1	chr6	136659229	136659629	1.04241	2.18503e-07
Tpm2	chr4	43522235	43522635	1.04227	6.66663e-06
Diaph1	chr18	37927835	37928235	1.04202	2.64729e-08
Pkn2	chr3	142826839	142827239	1.04192	9.93016e-06
Slc7a14	chr3	31327767	31328167	1.04154	8.31629e-07
Spon1	chr7	113739125	113739525	1.0411	0.000152734
Igf1	chr10	87731975	87732375	1.04105	0.000116325
Cdk6	chr5	3355662	3356062	1.04049	6.25504e-11
Rmdn2	chr17	79578940	79579340	1.04031	0.000223069
Ywhah	chr5	33002728	33003128	1.03889	1.68545e-09
4930565D16Rik	chr3	84388434	84388834	1.03873	7.06713e-05
Ndrg3	chr2	156973727	156974127	1.03865	2.53167e-05
Zfp950	chr19	61110899	61111299	1.03794	9.40718e-05
Trim3	chr7	105621228	105621628	1.03793	1.38341e-06
Trim29	chr9	43305839	43306239	1.03789	4.1595e-05
Slc44a3	chr3	121570670	121571070	1.03779	6.54056e-08
Gm10637	chr8	87071245	87071645	1.03762	0.000217527
Kcnk12	chr17	87763238	87763638	1.03747	3.7889e-07
Nxph3	chr11	95507237	95507637	1.03744	6.25259e-07
Zswim2	chr2	84048740	84049140	1.03726	2.98151e-10
Cebpa	chr7	35127517	35127917	1.03708	1.77119e-07
Foxp1	chr6	99188276	99188676	1.03675	2.85071e-06
Blm	chr7	80473855	80474255	1.03646	0.00047518
Ankrd45	chr1	161148328	161148728	1.0361	7.89562e-05
4933427D06Rik	chr6	88988548	88988948	1.03576	0.000437526
Fam110a	chr2	151974128	151974528	1.03525	9.53042e-06
4930515B02Rik	chr4	140859293	140859693	1.03518	6.64674e-05
Gm10646	chr9	67105901	67106301	1.03515	4.99733e-05
Gsap	chr5	21145276	21145676	1.03479	2.17606e-05
Peli1	chr11	21033984	21034384	1.0342	1.10661e-08
Cish	chr9	107306142	107306542	1.03405	0.000267944
Sema4b	chr7	80177447	80177847	1.03359	6.72246e-07
Gfod1	chr13	43243258	43243658	1.03336	3.60512e-05
Phldb1	chr9	44734234	44734634	1.03287	5.99864e-13
Fbxw11	chr11	32706607	32707007	1.03254	2.60241e-05
Cdkn2aipnl	chr11	51915774	51916174	1.03251	4.39577e-09
Nedd4l	chr18	65151305	65151705	1.03203	0.000108104
Nin	chr12	70077899	70078299	1.03184	4.41973e-05
Foxp1	chr6	99199283	99199683	1.03157	5.34547e-05
Fyb	chr15	6648960	6649360	1.03141	0.000449766
Rad54b	chr4	11536369	11536769	1.03134	0.00036875
Fkbp5	chr17	28522936	28523336	1.0305	1.0806e-08
Zbtb7a	chr10	81146329	81146729	1.03035	2.34168e-10
Lox	chr18	52535289	52535689	1.02979	0.000421069
Ktn1	chr14	47638435	47638835	1.02973	0.000478311
Rpl29	chr9	106418226	106418626	1.02973	5.67983e-07
Efcab12	chr6	115836196	115836596	1.02961	0.000236915
Kcne4	chr1	78812151	78812551	1.02807	6.01424e-05
Col6a3	chr1	90834777	90835177	1.02783	0.000207708
Mpz	chr1	171156753	171157153	1.02777	1.19236e-06
Matk	chr10	81256585	81256985	1.02733	1.92573e-07
Sipa1l2	chr8	125337877	125338277	1.02721	0.000161536
Il1rl1	chr1	40412422	40412822	1.02717	9.59737e-08
Aopep	chr13	63248045	63248445	1.0269	4.2903e-06
Utrn	chr10	12888334	12888734	1.0265	0.000236144
Trank1	chr9	111324863	111325263	1.02533	0.000260692
Ociad2	chr5	73342853	73343253	1.0253	9.00952e-07
Mapk14	chr17	28698157	28698557	1.02486	5.91405e-06
Npr1	chr3	90443929	90444329	1.02479	3.0268e-06
Carmil1	chr13	24104017	24104417	1.02449	2.21428e-05
Ccdc71l	chr12	32342022	32342422	1.02277	0.000293411
Lamc1	chr1	153300033	153300433	1.0217	2.88854e-07
Spryd7	chr14	61548553	61548953	1.02154	1.19234e-09
Lilrb4b	chr10	51480305	51480705	1.02142	1.29634e-07
Nab1	chr1	52460688	52461088	1.02057	0.000236209
Runx3	chr4	135073483	135073883	1.02046	4.67555e-06
Alas1	chr9	106257816	106258216	1.02019	7.21874e-05
Gpx3	chr11	54906529	54906929	1.01999	4.24123e-05
Nab1	chr1	52454582	52454982	1.01966	0.000310094
Epc2	chr2	49538056	49538456	1.0195	9.13599e-05
Gm28178	chr1	52597773	52598173	1.01919	3.96793e-07
Adam12	chr7	134001574	134001974	1.01865	0.000327022
Cd47	chr16	49951874	49952274	1.0183	6.11976e-06
Cmklr1	chr5	113628163	113628563	1.0178	1.7441e-08
Prdm16	chr4	154425271	154425671	1.01769	7.7108e-05
Scgb1a1	chr19	9093895	9094295	1.01763	0.000255183
Ppp1r26	chr2	28437843	28438243	1.01734	8.90798e-05
Rps6ka1	chr4	133843151	133843551	1.01729	3.31257e-13
Dlgap2	chr8	14716355	14716755	1.01655	6.07672e-05
Scn5a	chr9	119519054	119519454	1.01493	5.25582e-05
Ank	chr15	27390579	27390979	1.01389	5.72169e-06
Nsd2	chr5	33803359	33803759	1.01368	0.000223108
Rab7	chr6	88056859	88057259	1.01354	1.33906e-08
Lrrc8d	chr5	105636883	105637283	1.01283	5.94365e-07
1700065D16Rik	chr9	95859640	95860040	1.01258	1.5352e-06
St8sia1	chr6	142885335	142885735	1.01191	9.73113e-05
Gm15767	chr6	147253359	147253759	1.01119	0.000464666
Fzd5	chr1	64775081	64775481	1.01062	0.000302094
Usp47	chr7	111904049	111904449	1.01059	3.97983e-05
Maf	chr8	115742678	115743078	1.01024	0.000259434
Mir5130	chr14	102718577	102718977	1.01011	0.000313852
Rab39	chr9	53695791	53696191	1.00998	1.63892e-08
Arrdc3	chr13	80898496	80898896	1.00998	8.7818e-05
Gal	chr19	3419287	3419687	1.00985	3.8397e-05
Ctnna3	chr10	63571548	63571948	1.00958	0.000136566
Stim2	chr5	53968178	53968578	1.00949	5.13989e-06
Epg5	chr18	77946791	77947191	1.00933	7.19607e-07
Cracdl	chr1	37719809	37720209	1.00926	3.75408e-06
4933440J02Rik	chr10	111610409	111610809	1.00881	0.000239128
Hsf2bp	chr17	32023096	32023496	1.00797	3.57082e-09
Hdc	chr2	126607515	126607915	1.00771	1.41626e-08
Lysmd4	chr7	67243896	67244296	1.00755	1.28582e-06
Nfkb1	chr3	135582539	135582939	1.00754	1.37506e-06
Aig1	chr10	13832698	13833098	1.00744	4.53671e-12
C230014O12Rik	chr2	34139769	34140169	1.00741	4.41538e-07
Ldlrad4	chr18	67973727	67974127	1.00663	1.69967e-06
Hmgcr	chr13	96646832	96647232	1.00647	2.34201e-05
Gorab	chr1	163382429	163382829	1.00644	5.71759e-06
Pcdh7	chr5	57768609	57769009	1.00634	3.45025e-06
Gm9530	chr1	155074906	155075306	1.00604	6.93287e-09
Abcg3	chr5	104955209	104955609	1.00595	0.000282587
Gm4876	chr6	17143075	17143475	1.00567	6.25112e-05
Map3k5	chr10	20076983	20077383	1.00536	3.42359e-07
Tff1	chr17	31162615	31163015	1.00511	3.62431e-07
Sik3	chr9	46026409	46026809	1.00496	0.000130896
Adgrb2	chr4	130013314	130013714	1.00486	0.000367198
Irf2bp2	chr8	126580776	126581176	1.00462	1.77303e-05
1700065J11Rik	chr6	35388737	35389137	1.00446	0.000343449
Tnfrsf9	chr4	150922307	150922707	1.0039	8.01404e-06
Fam167a	chr14	63447768	63448168	1.00388	5.70816e-09
Tjp2	chr19	24146017	24146417	1.00332	8.78604e-05
Mif	chr10	75849447	75849847	1.00298	5.45351e-05
Zfand3	chr17	30052363	30052763	1.00235	0.000269001
Jak1	chr4	101202592	101202992	1.00172	0.000169345
Wnt10a	chr1	74806452	74806852	1.00107	2.28072e-06
E330017L17Rik	chr4	129894836	129895236	1.00062	0.00013216
Daglb	chr5	143471993	143472393	1.00061	1.68839e-09
Nedd4l	chr18	64972119	64972519	1.00042	2.59991e-06
Myo1e	chr9	70227579	70227979	1.00028	6.75448e-06
Xrn1	chr9	96001280	96001680	1.00026	0.000239714
Zbtb32	chr7	30594369	30594769	0.998967	1.87195e-10
Pde4d	chr13	108814248	108814648	0.998934	7.89523e-06
Gm7160	chr1	105908228	105908628	0.998807	0.000190061
Pdgfb	chr15	80034893	80035293	0.998553	1.28706e-09
Vwf	chr6	125527572	125527972	0.998083	0.000434698
Cenpf	chr1	189615288	189615688	0.997813	4.98517e-07
Tomm20	chr8	126919226	126919626	0.9978	4.44341e-06
Susd4	chr1	182839475	182839875	0.997748	0.000537034
Fhod3	chr18	24765050	24765450	0.996831	4.04124e-06
1700073E17Rik	chr6	145373772	145374172	0.996695	0.000297657
Sufu	chr19	46484463	46484863	0.996679	6.48727e-06
Sik3	chr9	46172913	46173313	0.996592	3.70147e-08
Cd200r3	chr16	44951385	44951785	0.996096	3.58317e-05
Gpa33	chr1	166169739	166170139	0.995461	8.40163e-06
Arl5c	chr11	97999199	97999599	0.995313	5.055e-06
Six5	chr7	19103731	19104131	0.994714	1.59649e-05
Ptprj	chr2	90528157	90528557	0.994257	5.53346e-08
Pvt1	chr15	62245330	62245730	0.994137	0.000129163
Hipk2	chr6	38892060	38892460	0.993794	4.94237e-05
Plet1	chr9	50497448	50497848	0.992643	3.15014e-06
Etv3l	chr3	87556188	87556588	0.992576	0.000330915
Trank1	chr9	111383776	111384176	0.992248	0.000471074
Man1a	chr10	54026708	54027108	0.992002	6.69833e-05
Vdr	chr15	97880498	97880898	0.990793	7.10634e-05
Smyd1	chr6	71223323	71223723	0.990791	1.0976e-07
Runx1	chr16	92847793	92848193	0.990558	3.99774e-06
Galnt9	chr5	110595353	110595753	0.990395	1.85901e-07
Plaur	chr7	24459795	24460195	0.99036	1.21552e-06
Fchsd2	chr7	101213696	101214096	0.989824	1.68666e-05
Atp9b	chr18	80851111	80851511	0.989528	1.91923e-05
Aqp3	chr4	41108637	41109037	0.989395	4.68919e-06
Gm16291	chr15	39821161	39821561	0.989003	7.2297e-06
Kcnip1	chr11	33882737	33883137	0.988703	4.60549e-05
Mir181a-1	chr1	137922682	137923082	0.98852	2.39187e-08
Slc4a7	chr14	14607071	14607471	0.988174	0.000314818
Cavin4	chr4	48674435	48674835	0.98766	3.32786e-06
Fam120a	chr13	48990328	48990728	0.987461	0.000647812
Bmper	chr9	23729034	23729434	0.987387	0.000738996
A030001D20Rik	chr7	45635232	45635632	0.987287	9.71788e-09
Plin2	chr4	86686600	86687000	0.986904	1.19489e-07
Lilrb4a	chr10	51521547	51521947	0.986564	1.58974e-07
Zmat4	chr8	23740607	23741007	0.986336	0.000257944
Dnajb4	chr3	152204828	152205228	0.986207	7.02e-06
Babam2	chr5	32055658	32056058	0.985941	3.5811e-05
Popdc2	chr16	38363105	38363505	0.985119	0.000126071
Chchd3	chr6	32823922	32824322	0.985087	0.000187982
Osbp2	chr11	3738815	3739215	0.984898	0.000334443
Xiap	chrX	42114101	42114501	0.984858	0.000240296
Thap6	chr5	91974027	91974427	0.984151	0.000311916
Rasgef1b	chr5	99203466	99203866	0.984099	4.27317e-10
Nsun3	chr16	62729741	62730141	0.983922	2.09041e-05
Epb41l2	chr10	25432902	25433302	0.983753	1.88641e-05
Tex35	chr1	157139357	157139757	0.983724	4.50326e-06
Vcl	chr14	20924075	20924475	0.983592	4.06396e-06
Ptgs1	chr2	36278845	36279245	0.982466	0.000118789
AU023762	chr9	113568827	113569227	0.98159	0.000106151
Adcy4	chr14	55777938	55778338	0.981356	8.50161e-05
Rnf220	chr4	117381846	117382246	0.980948	5.38282e-05
Gm19510	chr15	59836394	59836794	0.980584	4.74519e-05
Garre1	chr7	34321968	34322368	0.980474	7.35576e-05
Gabbr2	chr4	46721821	46722221	0.98037	0.000219268
Mettl15	chr2	108707839	108708239	0.980182	0.000589435
Herc3	chr6	58847754	58848154	0.980175	0.000470667
Map1b	chr13	99647909	99648309	0.980122	0.000398818
Nudt12os	chr17	59054239	59054639	0.979058	3.55346e-05
Dusp5	chr19	53552771	53553171	0.978751	1.08113e-05
Slc6a17	chr3	107534872	107535272	0.978621	2.73811e-05
Tfdp2	chr9	96184919	96185319	0.977576	0.00026238
Pglyrp2	chr17	32435009	32435409	0.977131	0.00038569
Crocc2	chr1	93173549	93173949	0.976083	0.000244381
Mbnl2	chr14	120324201	120324601	0.975743	5.36018e-07
Zfand2b	chr1	75162057	75162457	0.975471	0.000768756
Igf1	chr10	87816808	87817208	0.975334	4.23071e-10
1810014B01Rik	chr10	86612333	86612733	0.975232	0.000151686
Frmd6	chr12	70850834	70851234	0.975122	0.000286742
Mir3076	chr14	30583988	30584388	0.975071	5.36235e-07
Mir8118	chr4	33467147	33467547	0.974211	0.000135883
4930401O12Rik	chr13	31151558	31151958	0.974197	0.000233811
Mtap	chr4	89163634	89164034	0.974094	4.06476e-06
Itgav	chr2	83696266	83696666	0.973918	0.000127369
Ctbp2	chr7	133085407	133085807	0.973611	5.65664e-05
Tcf12	chr9	71942442	71942842	0.973329	7.63322e-05
Mir6361	chr18	32880426	32880826	0.973267	7.28971e-07
Dennd1a	chr2	38211454	38211854	0.973011	2.00065e-07
Blmh	chr11	76916533	76916933	0.972993	1.01414e-05
Pkp3	chr7	141078814	141079214	0.972508	0.000652846
Gm38560	chr10	82851750	82852150	0.972085	1.60594e-05
Epha6	chr16	59884040	59884440	0.971832	0.00079294
Odad2	chr18	7283797	7284197	0.971382	0.000145377
Tnfsf4	chr1	161406341	161406741	0.97116	0.000190403
Slc30a5	chr13	100846227	100846627	0.970268	5.10112e-05
Utrn	chr10	12821336	12821736	0.969867	2.77806e-08
Asap1	chr15	64221408	64221808	0.96969	0.000163153
4930447K03Rik	chr13	34096054	34096454	0.969665	0.000642366
Fyb	chr15	6638298	6638698	0.969604	0.00064044
Cecr2	chr6	120641731	120642131	0.969521	0.000363461
Slc28a3	chr13	58551925	58552325	0.96935	4.23027e-08
4930529N20Rik	chr13	35131619	35132019	0.9693	0.000117359
Gmds	chr13	32370810	32371210	0.969255	0.000463883
Lpgat1	chr1	191661039	191661439	0.968895	3.54362e-07
Gucy2g	chr19	55231162	55231562	0.968797	4.5305e-06
Myo1e	chr9	70242755	70243155	0.968505	3.40124e-05
Adgra2	chr8	27104966	27105366	0.968485	4.02601e-06
Sox5	chr6	144902572	144902972	0.968433	2.68799e-08
Igf2bp2	chr16	22116067	22116467	0.968379	8.90485e-07
Rabep1	chr11	70883071	70883471	0.968201	0.000170323
Kcnmb1	chr11	33967678	33968078	0.968002	1.48095e-10
Gm15506	chr7	98692708	98693108	0.967896	3.66242e-05
Trank1	chr9	111403137	111403537	0.967805	0.00045837
Nfatc2	chr2	168548074	168548474	0.967157	1.44695e-05
Zfand3	chr17	30228408	30228808	0.965539	0.000236264
Msra	chr14	64311684	64312084	0.965373	3.18329e-06
Tbc1d7	chr13	43202404	43202804	0.965005	6.11386e-05
Hivep3	chr4	119923020	119923420	0.964824	2.70983e-05
Nfkbiz	chr16	55776272	55776672	0.96466	1.67025e-06
Smim15	chr13	108015235	108015635	0.964496	3.73473e-06
Csnk1d	chr11	121004276	121004676	0.963599	3.41075e-05
Tln2	chr9	67565905	67566305	0.962949	1.64502e-05
Cldn5	chr16	18733284	18733684	0.962504	3.27087e-07
Parp1	chr1	180536731	180537131	0.96246	7.6976e-05
Mysm1	chr4	95001418	95001818	0.962443	3.00356e-05
Fam107b	chr2	3659491	3659891	0.962408	8.39129e-08
Spata6l	chr19	28926417	28926817	0.962306	0.000351408
Ostm1	chr10	42591655	42592055	0.962131	5.73258e-05
Cacna2d2	chr9	107505567	107505967	0.961921	0.000649083
Rin2	chr2	145843396	145843796	0.961732	0.000114526
Itprid2	chr2	79603373	79603773	0.961345	0.000352108
Kdm7a	chr6	39244062	39244462	0.961269	1.21261e-06
Gm19619	chr5	91289560	91289960	0.961184	0.000694729
Il20rb	chr9	100435139	100435539	0.960741	8.2408e-06
Il13ra1	chrX	36115095	36115495	0.960368	2.2804e-06
Pik3cb	chr9	99152806	99153206	0.960221	0.000119467
Ccdc73	chr2	104864476	104864876	0.960161	4.8087e-08
Arhgef3	chr14	27242726	27243126	0.960147	0.000771872
Rbfox1	chr16	6921156	6921556	0.960104	0.000879761
Airn	chr17	12804725	12805125	0.958102	0.000427919
Dgkz	chr2	91957053	91957453	0.957984	1.09563e-05
Nrp2	chr1	62621580	62621980	0.957521	3.22586e-05
1700016G22Rik	chr13	5345680	5346080	0.957128	5.54436e-05
Atp10d	chr5	72250173	72250573	0.956574	1.19331e-05
Slc38a2	chr15	96690845	96691245	0.955878	2.13746e-07
Zeb2	chr2	45089498	45089898	0.955837	2.61258e-07
Ccr3	chr9	124023063	124023463	0.95539	1.83574e-05
Eya1	chr1	14484502	14484902	0.954734	1.7682e-07
Gm38404	chr6	127236532	127236932	0.954588	0.00065636
Gm12295	chr11	65448470	65448870	0.954144	0.000397478
Rilpl2	chr5	124480104	124480504	0.953844	1.23882e-06
Sos2	chr12	69597440	69597840	0.953437	0.000191042
Dlgap2	chr8	14705654	14706054	0.953257	0.000256711
Zfp318	chr17	46388204	46388604	0.95308	1.28304e-06
1700029N11Rik	chr13	44328973	44329373	0.953034	0.000789929
Hsd17b12	chr2	94051935	94052335	0.952571	2.40071e-09
Jade2	chr11	51881008	51881408	0.951858	2.2949e-06
Ehd1	chr19	6299488	6299888	0.951693	3.14079e-09
Mapre2	chr18	23856470	23856870	0.950823	0.000387852
Ndufb4	chr16	37636089	37636489	0.95082	0.000574234
Mir5118	chr16	55636357	55636757	0.950605	4.0406e-05
Rragc	chr4	123940907	123941307	0.95044	2.54015e-05
Prune2	chr19	17024703	17025103	0.95039	0.000336329
Mir365-2	chr11	79761935	79762335	0.949202	0.000296192
Abcb8	chr5	24404988	24405388	0.949162	8.59221e-08
Sla	chr15	66807211	66807611	0.94891	4.49377e-07
Adora2a	chr10	75326571	75326971	0.948533	1.98879e-11
Pdcd1	chr1	94046579	94046979	0.948521	0.000120094
Mapkapk2	chr1	131092304	131092704	0.948127	9.03124e-08
Crygf	chr1	65768390	65768790	0.947812	9.88131e-05
BC051142	chr17	34392221	34392621	0.947784	0.000109543
Phyhd1	chr2	30258588	30258988	0.947538	1.4578e-05
Dusp4	chr8	34762764	34763164	0.947529	1.00032e-07
Stambpl1	chr19	34197987	34198387	0.946933	1.74166e-05
Mir100hg	chr9	41588304	41588704	0.946464	0.000813986
Iqsec3	chr6	121462814	121463214	0.946303	0.000689536
Gm20125	chr10	17082893	17083293	0.946169	0.000342328
Pola2	chr19	5953373	5953773	0.946083	6.21198e-05
Peli1	chr11	21014839	21015239	0.945168	0.000357402
Camk2d	chr3	126744420	126744820	0.945129	0.000241048
Tbck	chr3	132789444	132789844	0.944705	1.11981e-07
Rbpj	chr5	53553570	53553970	0.944544	0.000625823
Mir365-2	chr11	79793762	79794162	0.944498	2.24021e-08
Cep89	chr7	35423032	35423432	0.944226	0.000369507
1700122O11Rik	chr17	48039453	48039853	0.944086	0.000664173
Rab11fip1	chr8	27168182	27168582	0.94373	7.17919e-05
Niban1	chr1	151653487	151653887	0.943374	0.000505919
Rps6kc1	chr1	190732019	190732419	0.943181	0.000310235
Clec10a	chr11	70189286	70189686	0.943128	2.8329e-12
Ikbip	chr10	91092292	91092692	0.94272	0.000377627
Tmem158	chr9	123244052	123244452	0.942572	5.47259e-05
Hmg20a	chr9	56463777	56464177	0.942443	7.86499e-07
Smox	chr2	131426787	131427187	0.942299	1.51366e-07
Eya3	chr4	132611317	132611717	0.941361	1.05865e-08
Dnah17	chr11	118152945	118153345	0.941249	0.000290495
Tyms-ps	chr10	88008697	88009097	0.94117	2.7284e-08
Rufy1	chr11	50439831	50440231	0.940829	3.06676e-08
Pim1	chr17	29434567	29434967	0.940681	2.41144e-07
9430078K24Rik	chr12	79832641	79833041	0.940424	1.51337e-06
4930459C07Rik	chr10	96325403	96325803	0.940376	1.73483e-05
4930459C07Rik	chr10	96279075	96279475	0.939997	3.27733e-07
Serinc2	chr4	130268796	130269196	0.939649	4.09046e-06
Lrrfip1	chr1	91095217	91095617	0.939554	1.87082e-07
Pofut2	chr10	77218066	77218466	0.939481	0.000693986
Rgs3	chr4	62543764	62544164	0.93934	0.000151739
Pdlim5	chr3	142252097	142252497	0.93909	0.000700768
1500015L24Rik	chr19	20239375	20239775	0.938572	0.000407749
Cmip	chr8	117428728	117429128	0.938429	6.83874e-05
Scgb1a1	chr19	9058499	9058899	0.938294	8.40733e-10
Npm3-ps1	chr6	85086678	85087078	0.938261	0.000245013
Mir7241	chr9	67722363	67722763	0.938189	1.27393e-06
Tpsg1	chr17	25372461	25372861	0.937759	0.000566054
Chrna9	chr5	65973283	65973683	0.937705	2.9673e-09
Myl7	chr11	5895246	5895646	0.937677	0.000177369
Tnrc6a	chr7	123046595	123046995	0.937496	0.000153617
Megf10	chr18	57167527	57167927	0.937108	0.000556559
4933417E11Rik	chr1	72104031	72104431	0.93708	0.000194682
Marchf3	chr18	56934382	56934782	0.936361	0.000117103
Med13	chr11	86380452	86380852	0.934428	2.20312e-07
Adcy7	chr8	88298016	88298416	0.934267	8.23329e-12
Hmgcl	chr4	135942202	135942602	0.934124	6.97163e-09
Fbxo38	chr18	62494707	62495107	0.934083	0.000268164
Hif1a	chr12	73818832	73819232	0.933933	0.000721102
Tmem135	chr7	89155823	89156223	0.933755	0.00108862
Tsen2	chr6	115493396	115493796	0.933669	0.000325941
Nr4a3	chr4	47780984	47781384	0.933545	0.000965171
Gfra2	chr14	71082375	71082775	0.933445	9.63223e-05
AI662270	chr11	83239343	83239743	0.933436	0.000541335
Sdc4	chr2	164444402	164444802	0.933283	3.15484e-08
Med13l	chr5	118458953	118459353	0.933225	2.50044e-07
Mrpl1	chr5	96271104	96271504	0.933039	9.61198e-07
Cntnap5c	chr17	57801178	57801578	0.93292	2.14713e-06
Slc4a11	chr2	130689074	130689474	0.932871	2.51092e-05
Fam161a	chr11	23074809	23075209	0.932553	0.000100305
Foxn3	chr12	99468009	99468409	0.931919	2.0059e-05
Cdh15	chr8	122866185	122866585	0.931796	0.000114298
Arhgef3	chr14	27198791	27199191	0.931375	0.000888654
4921509O07Rik	chr13	113487061	113487461	0.931183	0.000328811
Pi4kb	chr3	94987632	94988032	0.930964	6.29113e-05
4930431P03Rik	chr14	45041103	45041503	0.930853	5.24797e-07
Dcstamp	chr15	39748576	39748976	0.929905	8.68213e-05
Adra1b	chr11	43919578	43919978	0.929373	0.000840107
4921504E06Rik	chr2	19540951	19541351	0.929301	0.000537509
Cdcp1	chr9	123237671	123238071	0.929277	0.000935838
Snhg4	chr18	35529735	35530135	0.929066	5.7097e-05
Dpys	chr15	39783819	39784219	0.92894	3.03095e-08
Tns3	chr11	8624450	8624850	0.928864	1.62657e-08
Stk38l	chr6	146717744	146718144	0.928463	3.72277e-05
4930447F24Rik	chr9	108156862	108157262	0.928458	0.000598473
2310043L19Rik	chr1	177569606	177570006	0.928282	2.16269e-05
Lamb3	chr1	193298242	193298642	0.928143	0.000486156
Il18	chr9	50546399	50546799	0.927986	0.00103464
Inpp5a	chr7	139415487	139415887	0.927782	1.85766e-06
Sel1l	chr12	91803324	91803724	0.927365	1.02855e-06
Rbfox1	chr16	6890658	6891058	0.927336	1.92163e-05
Syk	chr13	52580645	52581045	0.927262	0.000403274
Vill	chr9	119054044	119054444	0.927135	0.000709346
Hrh1	chr6	114458170	114458570	0.926796	5.45786e-05
Rab20	chr8	11487199	11487599	0.926747	1.21267e-05
Fem1b	chr9	62786763	62787163	0.926494	0.000380365
Hipk1	chr3	103759580	103759980	0.926423	0.000197456
Vgf	chr5	137015820	137016220	0.926396	0.000821617
Lyrm9	chr11	78864830	78865230	0.926366	0.000193733
Tacc1	chr8	25187445	25187845	0.926037	4.64086e-07
Btbd11	chr10	85739553	85739953	0.925555	0.000200964
Gsr	chr8	33674436	33674836	0.925363	0.000792568
Osm	chr11	4232666	4233066	0.925352	1.08312e-09
Cd44	chr2	102895188	102895588	0.925177	1.72087e-06
Tmco5	chr2	116801606	116802006	0.925134	9.01622e-07
Gtf2i	chr5	134266305	134266705	0.924791	0.000769618
Cux2	chr5	121996715	121997115	0.924548	1.07301e-05
Ceacam16	chr7	19855685	19856085	0.924295	3.09329e-05
Gprc5b	chr7	119002713	119003113	0.924145	0.000764055
1700065J11Rik	chr6	35424553	35424953	0.923373	0.000858374
Tet2	chr3	133758380	133758780	0.923232	7.05273e-08
A530013C23Rik	chr2	167715017	167715417	0.923102	6.28145e-07
Mia2	chr12	59086110	59086510	0.922142	4.06346e-05
Cav3	chr6	112465406	112465806	0.922095	0.00110787
Nt5c3	chr6	56897634	56898034	0.922005	0.000290792
AI197445	chr13	107485644	107486044	0.921616	8.23942e-05
Fam20c	chr5	138775064	138775464	0.92127	6.79445e-05
Cd47	chr16	49943685	49944085	0.921197	2.29221e-09
Cxcl2	chr5	90903297	90903697	0.920905	7.06713e-12
Slc13a1	chr6	24062263	24062663	0.920896	0.000667875
Gxylt1	chr15	93245525	93245925	0.920878	1.96949e-05
Mir3093	chr3	88209878	88210278	0.920873	0.000874031
Nepro	chr16	44734012	44734412	0.920661	0.000710224
Cpne2	chr8	94564447	94564847	0.920462	0.000183496
Sat1	chrX	155218271	155218671	0.920066	8.76903e-06
Rflna	chr5	124963774	124964174	0.920042	0.000807351
Sema7a	chr9	57954941	57955341	0.919569	0.000352235
Cdhr3	chr12	33061479	33061879	0.919383	1.32843e-05
Afp	chr5	90504713	90505113	0.919372	5.87562e-05
Mtus1	chr8	41099260	41099660	0.918586	0.000231207
Prdm1	chr10	44659554	44659954	0.917648	0.000144981
5730435O14Rik	chr10	41565213	41565613	0.917167	0.000304422
Prrg4	chr2	104856025	104856425	0.917159	0.000265245
Itga5	chr15	103382077	103382477	0.917007	8.48156e-08
4930522O17Rik	chr4	53239917	53240317	0.916755	8.71495e-05
Tent5c	chr3	100563465	100563865	0.916273	0.000304819
Cox10	chr11	64066075	64066475	0.916202	1.59212e-05
Tax1bp1	chr6	52703217	52703617	0.916032	0.000202775
Dpys	chr15	39834477	39834877	0.91603	9.64145e-06
Clec1a	chr6	129436024	129436424	0.915972	0.000136115
4930459C07Rik	chr10	96209960	96210360	0.915643	0.000166584
Hmx2	chr7	131551024	131551424	0.915242	1.89263e-06
Mir5123	chr4	40846555	40846955	0.915137	2.23675e-08
Slc66a2	chr18	80276881	80277281	0.91495	2.16235e-06
Tpbg	chr9	85820877	85821277	0.914801	2.44549e-06
Tnfsf8	chr4	63823159	63823559	0.91459	0.000949924
Gm5122	chr9	60959587	60959987	0.913982	0.000701429
Prdm1	chr10	44449733	44450133	0.913561	8.98535e-05
Smad3	chr9	63814876	63815276	0.913509	0.000739664
Efcab9	chr11	32502670	32503070	0.913404	0.000501479
Ckap2l	chr2	129263135	129263535	0.913241	2.44504e-07
Tnfaip3	chr10	18996382	18996782	0.912479	0.000256264
Has1	chr17	17866732	17867132	0.912448	5.27732e-07
Grin1	chr2	25304988	25305388	0.912329	2.53306e-06
Dglucy	chr12	100871800	100872200	0.912322	0.000453089
Nsun7	chr5	66232398	66232798	0.911953	5.37924e-05
Malat1	chr19	5822188	5822588	0.911286	3.0036e-06
Ociad2	chr5	73344319	73344719	0.911151	5.95146e-08
Gm19276	chr15	10814779	10815179	0.910844	0.000346764
Gm266	chr12	111471139	111471539	0.90999	1.83561e-05
Mirt1	chr19	53449092	53449492	0.909415	0.000125914
Anxa7	chr14	20471987	20472387	0.90936	0.000492344
Clvs1	chr4	9103973	9104373	0.909118	1.60641e-07
Abtb2	chr2	103655815	103656215	0.909107	1.43037e-05
9030616G12Rik	chr10	128972834	128973234	0.908873	0.000696699
A830052D11Rik	chr18	32343029	32343429	0.908447	0.000566401
B4galt5	chr2	167383566	167383966	0.908283	3.64639e-08
1700104L18Rik	chr12	54293191	54293591	0.90813	0.000294903
Septin7	chr9	25262112	25262512	0.907985	0.000705276
Eva1c	chr16	90885707	90886107	0.90796	2.40005e-05
Ubash3b	chr9	41051487	41051887	0.907422	9.01819e-09
Wwc1	chr11	35877585	35877985	0.907377	0.000272171
Pacsin2	chr15	83404033	83404433	0.90724	4.74785e-06
Ssh1	chr5	113975553	113975953	0.906877	4.20392e-05
Rhob	chr12	8509669	8510069	0.9065	2.69101e-07
Tlnrd1	chr7	83859703	83860103	0.906449	0.000339537
Skil	chr3	31090032	31090432	0.906341	5.36537e-07
Zfp523	chr17	28192729	28193129	0.905996	7.80237e-07
Sp2	chr11	96988286	96988686	0.905804	0.000662364
Mbnl2	chr14	120323083	120323483	0.905224	2.78204e-06
Chrna9	chr5	65951114	65951514	0.904581	3.21055e-05
Col23a1	chr11	51513014	51513414	0.904498	0.00085358
Otud4	chr8	79562058	79562458	0.904374	1.13252e-06
Slc37a3	chr6	39334258	39334658	0.904255	3.17166e-08
Syt6	chr3	103612646	103613046	0.90422	0.000299277
4930401O12Rik	chr13	31179379	31179779	0.903072	2.71522e-05
Ltbp1	chr17	75110377	75110777	0.902547	4.49526e-05
Kpna3	chr14	61452369	61452769	0.902524	1.69879e-05
Adora2b	chr11	62233923	62234323	0.902492	5.77754e-05
Morrbid	chr2	128380588	128380988	0.901997	7.90853e-06
1700031A10Rik	chr17	36920266	36920666	0.901874	0.000939091
Agap1	chr1	89601343	89601743	0.90161	0.000183171
Arhgap26	chr18	39378300	39378700	0.901587	0.000399175
Ecel1	chr1	87159427	87159827	0.901099	0.000837655
Rala	chr13	17948106	17948506	0.900347	2.96349e-05
2310020H05Rik	chr13	99055789	99056189	0.900055	3.64978e-06
Tbc1d1	chr5	64281965	64282365	0.899798	0.00117846
Myo1e	chr9	70261682	70262082	0.899708	1.27986e-08
Nrp2	chr1	62687472	62687872	0.899264	5.39364e-05
Polk	chr13	96487301	96487701	0.899113	0.000573024
Il1a	chr2	129315866	129316266	0.899111	8.83551e-05
Errfi1	chr4	150808466	150808866	0.898766	5.62828e-09
Gramd1b	chr9	40343822	40344222	0.898364	1.22606e-10
Slc16a11	chr11	70198334	70198734	0.898271	1.10114e-06
Bcas1	chr2	170253998	170254398	0.897962	1.07518e-05
Il1b	chr2	129370988	129371388	0.897748	5.47249e-05
Slc17a6	chr7	51723931	51724331	0.897463	5.94865e-08
Phc2	chr4	128707258	128707658	0.897175	3.60488e-06
Akt3	chr1	177287244	177287644	0.896918	0.00048561
Dip2c	chr13	9353816	9354216	0.896893	5.77717e-07
Epc2	chr2	49495626	49496026	0.89626	0.00138426
1700019E08Rik	chr2	46239871	46240271	0.89613	9.20963e-06
Syt6	chr3	103546174	103546574	0.896009	0.000119522
Dapp1	chr3	137973395	137973795	0.895611	0.000553235
Tmod3	chr9	75527243	75527643	0.895139	0.00125404
Rbpj	chr5	53631902	53632302	0.893986	0.000291734
Mas1	chr17	12870750	12871150	0.892798	0.000407866
Rap1b	chr10	117808236	117808636	0.89249	7.88286e-05
Pgs1	chr11	117989958	117990358	0.892452	3.67773e-09
Jag1	chr2	137006709	137007109	0.892409	7.87219e-06
Eva1c	chr16	90890748	90891148	0.891418	0.000279148
Pxdc1	chr13	34683227	34683627	0.891398	4.96847e-06
Tnfrsf9	chr4	150917489	150917889	0.891193	9.06123e-06
Ankrd46	chr15	36455416	36455816	0.891117	0.000220115
Rock2	chr12	16881752	16882152	0.891067	0.00056361
Traf5	chr1	192061629	192062029	0.891026	1.82245e-07
Pcdh7	chr5	57848494	57848894	0.89099	2.56465e-06
Nfil3	chr13	53019271	53019671	0.89089	0.000186575
Cd44	chr2	102945050	102945450	0.890609	2.16636e-05
Alkbh3os1	chr2	93976486	93976886	0.890594	3.90352e-08
Frrs1	chr3	116848958	116849358	0.890208	2.25988e-07
Prss56	chr1	87180901	87181301	0.890186	2.02433e-11
Actn4	chr7	28930708	28931108	0.890048	6.87281e-06
Chst11	chr10	82958394	82958794	0.889465	0.000298346
Sowahc	chr10	59241219	59241619	0.889054	2.26668e-05
Ldlrad4	chr18	68061969	68062369	0.888928	5.97722e-07
Gpr153	chr4	152260479	152260879	0.888841	7.31465e-05
Cc2d2a	chr5	43713058	43713458	0.888587	0.00117283
Riok3	chr18	12131332	12131732	0.888574	3.7894e-06
Il1rn	chr2	24341438	24341838	0.888559	2.80817e-07
Klf4	chr4	55778695	55779095	0.888316	2.44526e-05
Gm19410	chr8	35780822	35781222	0.887994	0.000468806
Lncppara	chr15	85648227	85648627	0.887985	0.000188252
Crk	chr11	75703748	75704148	0.887877	0.000562089
Anxa11	chr14	25861756	25862156	0.887769	3.3169e-07
Mir365-2	chr11	79741129	79741529	0.887344	0.00022266
Rbm48	chr5	3587920	3588320	0.887326	0.000265984
Paqr9	chr9	95578397	95578797	0.88705	0.000875018
Psmb6	chr11	70528600	70529000	0.886975	0.000100091
Mtmr7	chr8	40584659	40585059	0.886848	1.38828e-07
Banp	chr8	121990929	121991329	0.886678	0.00137534
Zfp267	chr3	36171427	36171827	0.886584	0.000571052
Cdk6	chr5	3367122	3367522	0.886509	0.000213151
Zfp706	chr15	36938564	36938964	0.885213	2.40264e-07
Slc39a2	chr14	51896834	51897234	0.88463	4.13048e-05
Gm38403	chr10	118981416	118981816	0.884212	7.52534e-05
Csdc2	chr15	81932922	81933322	0.884138	0.000162851
Ppp1r2-ps3	chr19	30389805	30390205	0.883894	0.000796635
Mir1192	chr19	23178522	23178922	0.883692	0.000625773
Gypc	chr18	32647527	32647927	0.88329	1.99168e-05
Spink5	chr18	43933808	43934208	0.883216	4.55712e-05
Elmo1	chr13	20433184	20433584	0.88309	4.03951e-07
Il10	chr1	131021331	131021731	0.882917	2.98721e-06
Ralgapa2	chr2	146403800	146404200	0.882453	0.00127728
Disc1	chr8	125278266	125278666	0.882	3.23743e-05
Ppara	chr15	85735279	85735679	0.881998	4.2903e-05
9030404E10Rik	chr16	30024715	30025115	0.881323	7.16535e-07
Cpne5	chr17	29169049	29169449	0.881267	0.000174642
Nectin3	chr16	46617546	46617946	0.880926	6.03286e-06
Klf6	chr13	6109245	6109645	0.880896	5.65278e-06
Zzef1	chr11	72848195	72848595	0.88089	0.000542785
Fau	chr16	76399844	76400244	0.880833	0.000318604
Lipc	chr9	70998717	70999117	0.880339	4.15341e-05
Mapk6	chr9	75402240	75402640	0.88032	0.000242335
Itgax	chr7	128129172	128129572	0.880106	8.46363e-09
Tmem182	chr1	40847538	40847938	0.879849	1.83062e-07
Ptprn	chr1	75262831	75263231	0.879112	5.12069e-06
St3gal6	chr16	58509517	58509917	0.878863	8.49059e-07
Mrps23	chr11	88215243	88215643	0.878534	2.72291e-05
Atg10	chr13	91246731	91247131	0.877863	0.000956204
Ifi203	chr1	173955055	173955455	0.877852	2.41872e-07
Nkx2-6	chr14	69135854	69136254	0.877798	6.24254e-05
Slc41a3	chr6	90639925	90640325	0.877666	0.000637916
Ptpn5	chr7	47113414	47113814	0.877419	2.59452e-05
Rab3ip	chr10	116930142	116930542	0.877293	7.88958e-05
Cd38	chr5	43865306	43865706	0.877196	5.25367e-05
Zc3h12c	chr9	52330615	52331015	0.876998	0.00105908
Ftdc1	chr16	58583799	58584199	0.876674	0.000939071
Flrt2	chr12	95466970	95467370	0.876602	4.52743e-05
Esrrb	chr12	86401936	86402336	0.876478	0.00112334
Eya4	chr10	23203609	23204009	0.876429	3.27071e-05
Prkab1	chr5	116009296	116009696	0.876179	0.000300718
Rhbdd2	chr5	135621694	135622094	0.875781	0.000199112
Ptgfrn	chr3	101141856	101142256	0.875701	0.000263507
Nudt12os	chr17	59209969	59210369	0.87542	0.000798493
Sel1l	chr12	91878772	91879172	0.875181	0.000141578
Susd3	chr13	49249564	49249964	0.874982	1.76876e-05
Hck	chr2	153122004	153122404	0.874963	5.87759e-05
Mlxip	chr5	123388462	123388862	0.874565	4.37824e-05
Gm48957	chr15	25420306	25420706	0.874178	0.00134447
Il34	chr8	110779952	110780352	0.873892	0.000416787
Lix1	chr17	17454630	17455030	0.87372	0.000720254
Fam13c	chr10	70395818	70396218	0.873572	0.00145216
Cep83os	chr10	94638212	94638612	0.873458	5.13319e-05
Ppm1h	chr10	122902777	122903177	0.873391	0.000447716
Gm16364	chr10	39570822	39571222	0.873294	1.88781e-06
Lpl	chr8	68926389	68926789	0.873109	6.61632e-07
Cpsf6	chr10	117393216	117393616	0.872438	1.25735e-05
A830052D11Rik	chr18	32335537	32335937	0.872402	0.000216869
Uck2	chr1	167242113	167242513	0.872208	1.11721e-08
Hcar2	chr5	123865398	123865798	0.872126	2.52132e-05
4930543E12Rik	chr7	113147386	113147786	0.871289	2.93714e-07
Fzd1	chr5	4530290	4530690	0.871181	4.7362e-05
Clcf1	chr19	4213381	4213781	0.870899	0.00012473
Lbh	chr17	72982179	72982579	0.87088	0.00151343
Tcf7l2	chr19	55768334	55768734	0.870841	0.000221831
Ppm1l	chr3	69519231	69519631	0.870796	1.00922e-05
Sgk2	chr2	162977253	162977653	0.870331	2.78358e-05
Optc	chr1	133856136	133856536	0.869848	9.25794e-08
5031425F14Rik	chr2	166399092	166399492	0.869695	0.00062039
Gm12724	chr4	106191862	106192262	0.869446	0.000485343
Gm11468	chr2	166289199	166289599	0.869376	0.000480561
Opa3	chr7	19221379	19221779	0.869226	1.27249e-06
Trmt61a	chr12	111686373	111686773	0.869164	5.52153e-06
Dock2	chr11	34776014	34776414	0.869003	1.5625e-06
Ranbp9	chr13	43467936	43468336	0.868863	0.000454135
Tafa5	chr15	86895112	86895512	0.868505	0.00122151
Hoxb1	chr11	96410968	96411368	0.868293	9.21643e-05
Camk2d	chr3	126848532	126848932	0.868235	9.10508e-05
Chrdl2	chr7	100046559	100046959	0.868212	2.53447e-05
Camta1	chr4	151895300	151895700	0.867672	4.16165e-06
Ccdc121rt1	chr1	181552776	181553176	0.867427	2.63658e-08
Btbd9	chr17	30530152	30530552	0.866984	0.00101814
Rapgef2	chr3	79059827	79060227	0.86696	0.000644411
Il1f10	chr2	24306660	24307060	0.866699	3.25252e-05
Il11	chr7	4779793	4780193	0.866189	5.02946e-05
E230016M11Rik	chr6	67081489	67081889	0.866119	6.93623e-07
Fnbp1l	chr3	122596494	122596894	0.86594	0.000152016
Pfkfb3	chr2	11512107	11512507	0.865437	0.000525301
Tmem266	chr9	55361971	55362371	0.865383	1.40896e-05
Nrbf2	chr10	67360802	67361202	0.865299	0.00130613
Tnni1	chr1	135793678	135794078	0.865241	0.000107405
Scarb1	chr5	125245800	125246200	0.865187	0.000647808
P2rx5	chr11	73160156	73160556	0.865185	1.64263e-06
[truncated: 61,526 more rows]
