# Supplementary material for: Statin-mediated reduction in mitochondrial cholesterol primes an anti-inflammatory response in macrophages by upregulating Jmjd3
Source: eLife. 2024 Apr 11;13:e85964. doi: 10.7554/eLife.85964 (PMC11186637; doi:10.7554/eLife.85964)
Supplement: Supplementary file 4. [file elife-85964-supp4.xlsx]

## Sheet: T
Table S 2	Genes showing chromatin opening (ATAC-Seq peak) and increased expression (RNA-Seq) after MCD treatment as well as Statin Treatment
Gene Symbol
Il1b
Cxcl2
Tnf
Nfkbiz
Arc
Ier3
Lif
Dusp2
Tnfaip3
Egr2
Dusp1
Btg2
Pde4b
Dusp5
Ptgs2
Phlda1
Nfkbid
Socs3
Pim1
Egr3
Osm
Traf1
Hmgcs1
Errfi1
Nlrp3
Kdm6b
Serpine1
Rasgef1b
Csrnp1
Plaur
Nos2
Trib1
Skil
