# Supplementary material for: Statin-mediated reduction in mitochondrial cholesterol primes an anti-inflammatory response in macrophages by upregulating Jmjd3
Source: eLife. 2024 Apr 11;13:e85964. doi: 10.7554/eLife.85964 (PMC11186637; doi:10.7554/eLife.85964)
Supplement: Supplementary file 5. [file elife-85964-supp5.xlsx]

## Sheet: outputDat
Table S2 Genes regulated by statin in LPS stimulated macrophages
gene_name	baseMean	log2FoldChange_Statin_LPS_vs_LPS	lfcSE	pvalue	padj
Cndp1	24.7062	-7.95476	2.80432	6.63176e-07	2.32789e-06
Gm18853	22.1757	-7.71645	2.81862	2.08347e-06	7.00295e-06
Ly6i	19.7242	-7.47845	2.80477	4.12005e-06	1.34681e-05
Bank1	17.0069	-7.20479	2.78151	8.10499e-06	2.57757e-05
Apol11a	16.2126	-7.10806	2.78028	1.08012e-05	3.39222e-05
Abcg1	6694.23	-6.99516	0.158365	0	0
Abca1	3412.43	-6.63298	0.145368	0	0
Dnmt3c	12.7674	-6.55288	2.81094	5.97372e-05	0.000174064
Cacna2d3	12.695	-6.52826	2.81155	6.30326e-05	0.000183233
Gm18752	12.6535	-6.48646	2.83536	7.89546e-05	0.000227073
Klrk1	196.042	-6.48444	0.575065	9.44381e-32	9.64276e-31
Flt4	34.3317	-6.4779	1.38356	1.74978e-06	5.9195e-06
Gbp9	2017.4	-6.30792	0.200076	7.78147e-219	5.82531e-217
BC023105	92.2162	-6.30361	0.779875	5.09301e-16	2.99559e-15
Fam3b	11.0639	-6.20447	2.82807	0.000136537	0.000381437
Apod	31.531	-6.19224	1.41591	4.25831e-06	1.3893e-05
Foxf1	29.8671	-6.16789	1.41672	5.56325e-06	1.79644e-05
Pax5	29.3943	-6.15824	1.45856	9.32115e-06	2.94452e-05
Apol10b	118.408	-6.14088	0.661893	1.62037e-20	1.14877e-19
Tnfsf10	3767.76	-6.00243	0.118892	0	0
Rbm11	10.0951	-5.98102	2.84693	0.000224593	0.000613049
Iigp1	4055.44	-5.93275	0.126114	0	0
Ms4a4c	2644.79	-5.85449	0.142834	0	0
Gm5970	39.319	-5.84907	1.09547	5.35287e-08	2.05499e-07
Gbp4	488.775	-5.78584	0.30583	2.37693e-80	5.48763e-79
Apol9b	761.87	-5.74929	0.237288	1.91956e-130	7.50068e-129
Pou3f1	271.471	-5.73661	0.385276	1.51181e-50	2.28387e-49
Mx1	17607.8	-5.71935	0.0915037	0	0
Gbp8	54.5553	-5.59708	0.924906	7.55667e-10	3.27897e-09
Calb2	32.626	-5.58265	1.12114	3.6106e-07	1.29598e-06
Gm4951	948.709	-5.55689	0.200562	1.00182e-169	5.46912e-168
Eif4ebp3	9.31118	-5.48025	3.08201	0.000839618	0.00214074
Ifi214	1438.48	-5.46835	0.163574	8.8813e-245	7.46128e-243
Tmprss13	19.311	-5.46701	1.4788	6.41407e-05	0.000186311
Trim30c	2198.56	-5.42236	0.135837	0	0
Sectm1a	277.347	-5.39149	0.356901	3.25594e-52	5.04989e-51
Trim30d	4322.71	-5.30608	0.0957769	0	0
Apol9a	3110.42	-5.28348	0.12752	0	0
Il6	10875.3	-5.27124	0.0692438	0	0
Ifi208	1043.85	-5.22938	0.178052	1.63123e-190	1.02781e-188
Phf11a	1091.32	-5.14889	0.176778	5.67755e-187	3.50433e-185
Tgtp1	744.556	-5.14543	0.246116	1.19696e-99	3.48086e-98
Misp	150.633	-5.11973	0.478757	1.23829e-27	1.12532e-26
Fcgr1	12454.4	-5.11037	0.0660679	0	0
Lhx2	399.542	-5.09859	0.271121	2.39299e-79	5.44982e-78
A530064D06Rik	8.13351	-5.0915	3.1609	0.00139876	0.00345623
Bmp10	33.5244	-5.07904	0.973651	5.36509e-08	2.05916e-07
BC147527	129.155	-5.07718	0.481974	1.91878e-26	1.68501e-25
Apol7a	8.18558	-5.06949	3.18265	0.00145547	0.00358756
Adap2	2981.06	-5.04172	0.115514	0	0
Kdr	237.526	-4.99963	0.378821	3.80453e-40	4.74296e-39
Gm20394	14.9835	-4.99636	1.54719	0.000251319	0.000682797
Cxcl9	1346.12	-4.95846	0.195349	5.41727e-144	2.36763e-142
Ifi209	8772.78	-4.91609	0.0679106	0	0
Ogdhl	7.20718	-4.90035	3.09971	0.00155523	0.00381914
Rhbg	22.5542	-4.8976	1.18063	8.1232e-06	2.58228e-05
Hap1	1581.99	-4.86958	0.136707	2.08306e-278	2.08609e-276
Ifi205	7676.71	-4.81717	0.101234	0	0
Mtus1	558.599	-4.77476	0.252672	2.75519e-80	6.35121e-79
Gm49392	6.88143	-4.74322	3.15167	0.00188919	0.00458561
8030451A03Rik	13.9124	-4.69801	1.58986	0.000449212	0.00118966
Cxcl11	37914.8	-4.68398	0.299349	2.10999e-56	3.51402e-55
Cldn23	232.787	-4.67461	0.352496	8.99717e-41	1.14428e-39
Dnase1l3	63.8027	-4.64064	0.618745	1.24488e-14	6.88301e-14
Spsb1	655.316	-4.63489	0.191668	7.27279e-130	2.81998e-128
Ifit1bl1	2821.64	-4.60002	0.114174	0	0
Arsi	6.77313	-4.5911	3.27192	0.00235009	0.005616
Gm50388	744.934	-4.58993	0.66264	1.96358e-13	1.02285e-12
Calhm6	2824.54	-4.58261	0.148808	1.58084e-208	1.10674e-206
Rnase6	30.501	-4.58062	1.01552	1.04555e-06	3.59747e-06
Tgtp2	4693.1	-4.57322	0.0816845	0	0
Fgf6	12.2369	-4.52707	1.64811	0.000848704	0.00216244
Phf11	144.866	-4.50754	0.413374	9.23801e-29	8.65534e-28
Cdh5	20.9468	-4.50217	1.2209	2.16116e-05	6.59158e-05
Gbp11	85.9518	-4.44999	0.542182	3.1001e-17	1.93398e-16
Slamf9	1880.48	-4.42885	0.128931	7.64496e-259	6.96428e-257
Ifi206	412.325	-4.41881	0.260241	6.52175e-66	1.24523e-64
Slfn1	2984.51	-4.40699	0.158191	2.14795e-171	1.19416e-169
Ifit3b	8735.05	-4.38335	0.0717975	0	0
Gbp6	977.681	-4.38299	0.326362	1.6828e-42	2.21474e-41
Il33	206.978	-4.36065	0.32575	1.30136e-41	1.68775e-40
Sgms2	408.944	-4.35268	0.247205	1.42841e-70	2.91898e-69
Gm18342	74.6073	-4.34822	0.542276	1.79919e-16	1.08439e-15
Ifit3	34232.1	-4.34398	0.0539585	0	0
Ms4a4b	70.8632	-4.32335	0.619383	2.38499e-13	1.23852e-12
Gm40770	19.0113	-4.31429	1.38129	0.000149207	0.00041499
Plekha4	1031.03	-4.31294	0.178396	1.8481e-129	7.12931e-128
Lipn	38.8871	-4.27793	0.776009	3.26146e-09	1.36544e-08
Dlx1	17.7068	-4.24594	1.11398	1.72217e-05	5.31375e-05
Unc80	124.385	-4.23405	0.408238	2.56158e-26	2.23521e-25
Nxpe1-ps	28.4727	-4.23018	0.868123	1.37471e-07	5.11652e-07
Gm43302	1988.22	-4.19707	0.124631	1.53108e-249	1.33832e-247
Gbp10	294.021	-4.19612	0.286828	2.93249e-49	4.32635e-48
Oasl2	14239.9	-4.16846	0.052798	0	0
Gm26797	76.0635	-4.12667	0.538732	2.31429e-15	1.32213e-14
Cyp26a1	10.4234	-4.12337	1.72883	0.00180312	0.00438867
Csf1	14870.7	-4.10801	0.0520321	0	0
Plaat3	540.682	-4.09661	0.219202	6.86565e-79	1.54959e-77
B430306N03Rik	268.677	-4.09208	0.333432	1.59953e-36	1.82689e-35
Cfb	6182.44	-4.08687	0.0715152	0	0
Gbp2b	25622.6	-4.08471	0.0460008	0	0
Gm4841	28.9915	-4.06755	0.878769	3.77591e-07	1.3537e-06
Dll1	1108.28	-4.04887	0.142687	9.56835e-178	5.48078e-176
Ddx60	11292.8	-4.04557	0.0716694	0	0
Il18bp	591.226	-4.02488	0.190976	1.53217e-99	4.43858e-98
Gm17034	53.1698	-4.02331	0.74319	7.04739e-09	2.8834e-08
Cyp26c1	9.68976	-4.01109	1.75425	0.00229874	0.00549937
Nhlh1	115.56	-4.00565	0.426823	5.32809e-22	4.01452e-21
Fbn1	95.8543	-3.98192	0.456706	2.94314e-19	1.99669e-18
Lipg	2487.81	-3.979	0.10608	0	0
Gbp2	24147.4	-3.97264	0.0551689	0	0
Phactr1	9.24362	-3.96978	1.87919	0.00267463	0.00634718
Isg20	6138.75	-3.96808	0.0870644	0	0
Gm12250	1888.25	-3.96787	0.137096	5.99751e-186	3.61332e-184
Fam171b	1596.9	-3.95287	0.164103	8.32414e-129	3.19486e-127
Nod1	1625.5	-3.94754	0.13353	8.54143e-194	5.51981e-192
Sh2d6	1036.67	-3.94104	0.141962	3.26321e-170	1.78791e-168
Pla2g4c	58.3272	-3.93028	0.615767	2.19113e-11	1.04196e-10
Gm26576	9.47309	-3.92281	1.8114	0.00281889	0.00666155
Amotl2	1002.66	-3.91979	0.14695	5.24532e-158	2.6092e-156
Trim30b	348.983	-3.89549	0.259411	1.08225e-51	1.65311e-50
Avil	37.7736	-3.89224	0.976563	2.49092e-06	8.31882e-06
Kmo	74.9614	-3.89054	0.517352	4.39735e-15	2.48029e-14
Adamts8	57.1474	-3.87299	0.630975	9.6081e-11	4.39352e-10
Acacb	48.3568	-3.83794	0.62703	7.04906e-11	3.25087e-10
Rab19	738.203	-3.83603	0.181495	8.93073e-100	2.60213e-98
Mmp28	512.738	-3.82615	0.212454	3.29901e-73	6.97729e-72
Gm15856	50.8804	-3.82498	0.602321	2.5601e-11	1.21094e-10
Gm11611	45.7604	-3.80625	0.705525	4.88752e-09	2.01993e-08
Aldh1b1	3075.03	-3.80539	0.0850472	0	0
Tlr3	4897.43	-3.79866	0.0758985	0	0
Batf2	5548.56	-3.79712	0.0910703	0	0
Gbp3	17489.4	-3.78047	0.0768954	0	0
Cdhr3	20.5965	-3.7802	1.00341	1.6459e-05	5.08465e-05
Ms4a6c	12644.3	-3.76925	0.0631809	0	0
Siglec1	5399.42	-3.73918	0.0831084	0	0
1700019D03Rik	150.532	-3.73535	0.381334	1.34341e-23	1.0726e-22
Tnfrsf17	41.7436	-3.72839	0.669858	2.37234e-09	1.0018e-08
Rnd3	538.166	-3.71354	0.213945	3.32735e-68	6.58589e-67
Trp53i11	297.613	-3.70739	0.241864	6.02236e-54	9.63705e-53
Tlr11	9.46739	-3.70489	1.84571	0.00321827	0.00753472
Gbp5	66235.5	-3.68536	0.0848497	0	0
Serpina3f	167.883	-3.66976	0.328546	6.95813e-30	6.79721e-29
Cd69	7019.09	-3.6664	0.0771396	0	0
Igsf9	245.62	-3.6512	0.544732	9.92602e-13	5.00004e-12
Tmcc3	622.471	-3.64904	0.229972	1.15972e-57	1.96166e-56
Ifnb1	3817.34	-3.64842	0.160197	9.393e-116	3.15647e-114
4930520O04Rik	139.151	-3.6451	0.437632	2.84694e-18	1.85406e-17
Phf11b	7332.83	-3.64328	0.0944503	0	0
Cnksr1	263.269	-3.63238	0.288853	2.01017e-37	2.3455e-36
Zbp1	8565.79	-3.61604	0.0782057	0	0
Gm39556	18.886	-3.60785	1.0374	4.53417e-05	0.000133761
Gpc1	237.315	-3.56867	0.284066	2.73579e-37	3.18235e-36
Apba1	71.3671	-3.56568	0.492843	4.10904e-14	2.22314e-13
Gm49708	25.603	-3.55317	1.12358	0.000114192	0.000322708
Il15ra	5075.97	-3.5522	0.0903133	0	0
Mylip	2136.55	-3.54173	0.182429	7.11114e-85	1.72885e-83
Gm6264	174.967	-3.52061	0.321239	4.28151e-29	4.0618e-28
Sgk1	4634.49	-3.51677	0.15322	1.85284e-117	6.32476e-116
Ccnd2	4548.78	-3.51608	0.119234	1.5013e-192	9.66069e-191
Ifit2	256399	-3.51478	0.0981443	6.71656e-286	6.9567e-284
Sptbn2	296.515	-3.51421	0.247021	8.42061e-47	1.19117e-45
Gbp7	17207.6	-3.50573	0.0523997	0	0
Mir100hg	248.001	-3.50475	0.573511	6.55979e-11	3.02892e-10
Gm12185	478.848	-3.48507	0.196585	1.25069e-71	2.59082e-70
A630012P03Rik	8.70237	-3.47665	1.90518	0.0043963	0.010082
Shf	74.8103	-3.47436	0.506905	6.71431e-13	3.4152e-12
Ifi44l	10917.7	-3.46807	0.0630604	0	0
Il15	10457	-3.46612	0.0995802	2.18432e-266	2.06446e-264
Fcgr4	3873.57	-3.46514	0.114428	3.23778e-202	2.16645e-200
Ctla2b	79.0196	-3.4522	0.547409	3.50045e-11	1.64289e-10
Pi16	192.51	-3.44231	0.302664	2.53604e-31	2.57037e-30
Rnasel	234.043	-3.44049	0.261465	1.19942e-40	1.52034e-39
Gm32200	73.1071	-3.43649	0.480136	9.2123e-14	4.87092e-13
Tacr2	152.978	-3.4284	0.332214	6.61594e-26	5.71366e-25
H2-T24	7075	-3.41664	0.0603835	0	0
Itpka	7.80413	-3.41401	1.95782	0.00575797	0.0129053
Gm17167	15.0562	-3.40698	1.2707	0.000498302	0.00131278
Gm7609	1421.83	-3.40521	0.114319	6.33854e-196	4.14941e-194
Nipal1	177.843	-3.40155	0.443132	4.82364e-16	2.84379e-15
Gm5831	133.672	-3.39891	0.369555	2.44017e-21	1.80046e-20
Bambi-ps1	103.522	-3.3863	0.423895	1.11118e-16	6.75099e-16
Adam33	20.6616	-3.37971	0.93831	2.8575e-05	8.62153e-05
Slco2a1	30.532	-3.36959	0.744487	5.66787e-07	2.00069e-06
Piwil4	13.3342	-3.3633	1.6716	0.00212235	0.00510404
Gm2619	725.949	-3.33972	0.15383	8.58398e-106	2.61708e-104
Rsad2	520319	-3.33469	0.0711985	0	0
Epsti1	5856.82	-3.32937	0.0686992	0	0
Tnfsf8	62.7521	-3.31406	0.562398	3.76033e-10	1.65687e-09
I830077J02Rik	2510.14	-3.3085	0.10234	4.06377e-230	3.18406e-228
Meiob	19.0273	-3.30105	0.963165	5.37863e-05	0.000157261
Gm49442	37.9015	-3.29365	0.653636	4.19984e-08	1.62347e-07
Snn	877.456	-3.2903	0.15433	6.73943e-102	2.00223e-100
Rax	7.61924	-3.28583	2.0308	0.00673785	0.0149311
Endod1	3565.46	-3.28001	0.126795	3.52413e-149	1.64481e-147
Glipr2	715.766	-3.27717	0.150704	1.09062e-105	3.31837e-104
Espn	7.26199	-3.25699	2.30268	0.00825227	0.0180099
C1rl	93.819	-3.25393	0.409208	1.62986e-16	9.8351e-16
Cmpk2	187293	-3.2533	0.057785	0	0
Srcin1	128.463	-3.25152	0.399336	3.91192e-17	2.42741e-16
Ms4a6b	3308.95	-3.2487	0.113775	6.32525e-181	3.67886e-179
Gm7582	340.592	-3.24571	0.215548	2.45197e-52	3.80685e-51
Ildr1	22.9563	-3.23766	0.952133	4.51493e-05	0.000133297
Snai2	69.9518	-3.23395	0.483346	1.68451e-12	8.40977e-12
Igtp	18899.1	-3.23365	0.0511268	0	0
Gm47507	21.2273	-3.22641	0.939258	4.41241e-05	0.000130474
Cdkl5	347.93	-3.21	0.21428	7.82945e-52	1.20078e-50
Slc28a2b	42.9324	-3.20548	0.604126	9.20231e-09	3.73677e-08
Ifi47	16839	-3.20069	0.0604396	0	0
Hsh2d	33.0897	-3.19981	0.685467	2.8149e-07	1.02324e-06
Herc6	9225.01	-3.18608	0.074302	0	0
Nectin4	60.7293	-3.18318	0.535055	2.53499e-10	1.12914e-09
Pik3ip1	156.402	-3.18051	0.34286	1.31171e-21	9.78094e-21
Irf7	36611.8	-3.17678	0.0619307	0	0
Galnt3	321.547	-3.17519	0.287346	1.18701e-29	1.14623e-28
Angptl3	17.4336	-3.17353	1.01326	0.000123482	0.000346888
Gm45418	43.0028	-3.16789	0.714426	6.84112e-07	2.39915e-06
Aldh1a2	9.81037	-3.16174	1.47262	0.00246079	0.00586571
Olfr56	457.554	-3.15318	0.18642	3.1366e-65	5.91417e-64
Nos1	13.1022	-3.15308	1.41847	0.00138018	0.00341423
Phf11d	11359.1	-3.1481	0.0681499	0	0
Ccl12	152.612	-3.14281	0.31934	6.62059e-24	5.3424e-23
Cd86	2496.75	-3.13904	0.118932	2.53506e-154	1.23662e-152
Gm4117	159.252	-3.13764	0.346454	6.06571e-21	4.37414e-20
A530040E14Rik	11483.3	-3.13557	0.237342	5.55913e-41	7.08813e-40
Gm11772	414.822	-3.13341	0.212915	6.84318e-50	1.02357e-48
Ifi211	8818.22	-3.12931	0.0649134	0	0
Fscn1	2889.38	-3.11879	0.0859477	1.23831e-289	1.30949e-287
Ccdc39	24.2725	-3.11688	1.05141	0.000168818	0.000466402
Gnb4	601.898	-3.11268	0.794831	4.41886e-06	1.44013e-05
Hsf2bp	21.4784	-3.10626	0.954178	9.21122e-05	0.000262716
Art3	36.9601	-3.10466	0.858433	1.921e-05	5.89358e-05
9930111J21Rik1	5625.5	-3.10123	0.0670809	0	0
Gdf11	9.5882	-3.0945	1.49541	0.00286169	0.00675882
Gm38575	39.5413	-3.09247	0.706137	1.00087e-06	3.45314e-06
AC167036.1	1869.95	-3.09219	0.0974199	6.13249e-222	4.66008e-220
Usp18	51660.7	-3.0806	0.0539261	0	0
Tspan33	94.7817	-3.068	0.388457	2.84005e-16	1.69417e-15
Ly6m	11.8326	-3.06392	1.39286	0.00250244	0.00596218
Tiam1	556.987	-3.06257	0.239251	1.55807e-38	1.86993e-37
Rnf152	9.54405	-3.0614	1.62891	0.00420095	0.0096604
AC147806.2	6763.4	-3.06085	0.0647526	0	0
Gm43056	42.4999	-3.05673	0.613135	5.64671e-08	2.16505e-07
Gm7592	24.0221	-3.05601	0.983578	0.000108149	0.000306432
Mir9-3hg	61.8559	-3.05492	0.476533	1.32132e-11	6.35125e-11
F830016B08Rik	14.0509	-3.04831	1.15523	0.000649632	0.00168157
Dnhd1	84.7444	-3.04668	0.861988	1.99991e-05	6.12446e-05
Gm4759	53.5245	-3.03628	0.526	7.56336e-10	3.28093e-09
Slamf8	119.971	-3.03209	0.447051	7.13192e-13	3.62639e-12
H2-T22	6283.22	-3.0307	0.0732517	0	0
A530032D15Rik	3150.29	-3.0265	0.147516	1.62068e-94	4.43182e-93
Gm35021	45.4758	-3.01989	0.585923	1.96034e-08	7.74813e-08
Hacd4	769.368	-3.01831	0.192089	1.57064e-56	2.61865e-55
Hectd2	48.9492	-3.0164	0.547814	2.77793e-09	1.16948e-08
Lgals9	15613.8	-3.01118	0.0503365	0	0
Ifi204	34034.1	-3.00434	0.0520835	0	0
Xdh	2788.55	-2.9996	0.103755	1.18078e-184	7.02983e-183
Serpinb2	534.079	-2.99292	0.203917	1.17643e-49	1.7527e-48
Rubcnl	1103.12	-2.98608	0.149822	3.3108e-89	8.42861e-88
Mmp25	131.954	-2.97329	0.330699	2.68809e-20	1.89507e-19
Kalrn	25.3607	-2.97275	0.814809	2.3441e-05	7.12082e-05
Gbgt1	125.272	-2.96589	0.337102	1.16544e-19	8.02177e-19
Upp1	159.779	-2.96463	0.368714	8.20173e-17	5.02946e-16
Gm45799	116.839	-2.96211	0.355481	4.89213e-18	3.1534e-17
Nlrc5	10073.7	-2.9598	0.0608794	0	0
Ms4a6d	11220.3	-2.95533	0.0553373	0	0
Gm16026	5147.29	-2.95262	0.093489	9.24047e-220	6.98672e-218
Cxcl10	260506	-2.95209	0.116868	6.81245e-142	2.91835e-140
Gm18445	942.291	-2.95174	0.138516	1.04294e-101	3.09241e-100
Uba7	9503.2	-2.94617	0.0665374	0	0
Olfr432	11.1752	-2.94579	1.29971	0.00172948	0.00421826
Pml	8744.21	-2.94502	0.0843514	5.63298e-269	5.39126e-267
Parp8	267.989	-2.94319	0.270072	1.01221e-28	9.46024e-28
Mfsd9	811.158	-2.94086	0.189052	1.85333e-55	3.043e-54
Gm6545	49.9942	-2.94012	0.720337	2.70446e-06	8.9982e-06
Gm4070	36780.5	-2.93967	0.0491827	0	0
Sp100	11837.7	-2.91101	0.0646244	0	0
Gm2427	57.8097	-2.9095	0.519342	1.61493e-09	6.88302e-09
Tnfsf13b	145.494	-2.90394	0.306687	2.45348e-22	1.87192e-21
Bco2	160.566	-2.88679	0.294987	1.17677e-23	9.41043e-23
Stbd1	61.7629	-2.87894	0.483489	2.43215e-10	1.08461e-09
Sox30	29.3008	-2.87636	0.746189	8.37725e-06	2.65968e-05
Triqk	25.6917	-2.87541	0.760919	1.10965e-05	3.48208e-05
Paqr8	31.0438	-2.87026	0.735596	7.02444e-06	2.24955e-05
Gm45193	1383.35	-2.86415	0.161296	1.46945e-71	3.03565e-70
Gprc5c	790.752	-2.85944	0.249096	1.44606e-31	1.47156e-30
Npr1	22.3631	-2.85477	0.9205	0.000119211	0.000335449
Ifi203-ps	2972.93	-2.85019	0.0802035	2.05131e-277	2.04079e-275
Prr5l	112.986	-2.81917	0.463651	1.10082e-10	5.02158e-10
Ifi27l2a	8122.69	-2.80908	0.0583465	0	0
Trim30a	30175.2	-2.8081	0.0421959	0	0
Insl6	765.052	-2.80658	0.155848	2.25847e-73	4.81023e-72
Phf11c	454.685	-2.80649	0.172986	3.44387e-60	6.0556e-59
AC147806.1	590.864	-2.79787	0.163086	4.41196e-67	8.57554e-66
Heatr9	239.167	-2.79775	0.244387	2.53229e-31	2.5683e-30
Gm12187	29.6054	-2.79547	0.719125	7.75604e-06	2.47145e-05
Prnp	5294.46	-2.79319	0.100483	5.26663e-171	2.91729e-169
Gm19410	15.5621	-2.79305	1.08322	0.00064307	0.00166687
Tap1	20914.8	-2.79113	0.102201	2.76447e-165	1.46169e-163
Mlkl	2951.87	-2.7849	0.087226	1.61955e-224	1.24953e-222
Tnfsf18	24.8694	-2.77741	0.782261	3.0501e-05	9.16605e-05
Psmb9	4795.25	-2.76114	0.0774269	1.60908e-279	1.63306e-277
AC147806.3	60.218	-2.75888	0.468641	3.66006e-10	1.61363e-09
Zcchc24	76.8906	-2.75759	0.417303	3.59871e-12	1.77494e-11
Il27	39419.9	-2.7567	0.0486685	0	0
Rnf213	95537.4	-2.74957	0.391716	5.19354e-14	2.79689e-13
Gm16094	252.318	-2.73598	0.230189	1.46689e-33	1.55884e-32
Slc28a2	273.832	-2.72214	0.218447	1.15424e-36	1.32532e-35
Rdh12	37.374	-2.7167	0.612255	8.09283e-07	2.81398e-06
Sfxn2	1803.81	-2.70813	0.0934606	1.13773e-185	6.82727e-184
Zfp945	2008.86	-2.70474	0.119398	1.82871e-114	6.06442e-113
Gm41442	214.96	-2.70461	0.254251	2.20232e-27	1.98471e-26
Gm10553	1792.15	-2.69895	0.204166	6.17291e-41	7.85747e-40
Gm5431	6656.15	-2.69755	0.0618642	0	0
Sirpb1c	33.2096	-2.69615	0.767472	3.49691e-05	0.000104321
Gm26543	21.5618	-2.69531	0.832891	9.85184e-05	0.000280195
Cd274	19280.4	-2.69216	0.060449	0	0
Npnt	38.083	-2.68798	0.650817	2.85045e-06	9.46937e-06
Mndal	30761.4	-2.68371	0.0560922	0	0
Samhd1	26698.1	-2.68245	0.050118	0	0
Unc45b	14.625	-2.67901	1.14075	0.00107567	0.00269801
Nat2	1708.13	-2.6788	0.100767	7.014e-157	3.4662e-155
AC115752.1	907.519	-2.67063	0.122797	6.2982e-106	1.92407e-104
1700041G16Rik	10.0264	-2.66859	1.37545	0.00343636	0.00801552
Setdb2	8434.7	-2.66719	0.0726883	1.16752e-295	1.26109e-293
Gypc	9887.5	-2.66336	0.12594	2.79882e-100	8.23419e-99
Gca	1616.07	-2.65804	0.163543	1.94887e-60	3.43883e-59
AC167036.2	235.614	-2.65762	0.239146	9.47104e-30	9.19596e-29
Nt5c3	12123.3	-2.6483	0.0558203	0	0
Slc46a3	167.809	-2.64384	0.325533	3.21501e-17	2.00237e-16
9930111J21Rik2	11749.5	-2.6412	0.0637356	0	0
Psme2b	1011.26	-2.64113	0.148016	2.31571e-72	4.85688e-71
Axl	1828	-2.63822	0.235216	2.72319e-30	2.68975e-29
Cfap43	24.6729	-2.63801	0.914609	0.00023414	0.000637842
F8	34.2357	-2.63618	1.05642	0.000429748	0.00114031
Osmr	13.0437	-2.62998	1.21415	0.00194202	0.00470177
Slfn9	13249.8	-2.62501	0.0582206	0	0
Tfcp2l1	935.448	-2.62098	0.155832	1.11675e-64	2.0823e-63
9530082P21Rik	1032.18	-2.61893	0.119122	4.64875e-108	1.44945e-106
Atp10a	51.5053	-2.61759	0.669231	6.74576e-06	2.16259e-05
Gm10134	157.233	-2.60915	0.309048	2.45097e-18	1.6024e-17
Sp110	32529.4	-2.59646	0.0859269	1.17816e-201	7.8141e-200
Sdc3	8828.11	-2.58232	0.0515094	0	0
Gm36161	84.8961	-2.58175	0.462703	1.84078e-09	7.82358e-09
Elovl4	75.9186	-2.57098	0.435359	3.54846e-10	1.56534e-09
Themis2	16183	-2.57091	0.0655508	0	0
Aftph	17349	-2.57026	0.0642864	0	0
AA467197	628.536	-2.56906	0.143586	1.27815e-72	2.69194e-71
Ctse	505.277	-2.56801	0.165712	2.86676e-55	4.68154e-54
Gm12715	57.1626	-2.56665	0.620654	3.03593e-06	1.00678e-05
Timeless	1980.67	-2.56288	0.107067	1.13665e-127	4.2651e-126
Gm15753	1851	-2.56072	0.142684	6.07919e-73	1.28214e-71
Enpp5	17.7615	-2.56013	1.04364	0.00101448	0.00255597
Ifit1	120288	-2.55579	0.0729155	4.88789e-270	4.76869e-268
Angptl6	252.965	-2.55416	0.23492	1.41068e-28	1.31276e-27
Asb13	599.836	-2.55301	0.235122	1.01009e-28	9.44626e-28
Msl3l2	156.119	-2.55228	0.302277	3.38603e-18	2.19852e-17
Gm7281	46.8749	-2.5517	0.600304	1.93432e-06	6.51464e-06
H2-T23	15250.1	-2.54955	0.0525332	0	0
Ifi203	54524	-2.54728	0.0433776	0	0
Mxd1	3565.83	-2.54415	0.129016	1.66228e-87	4.14801e-86
Scd1	6498.23	-2.54337	0.0947788	8.94201e-160	4.53762e-158
Actb	347259	-2.54335	0.0416898	0	0
Ass1	4587.63	-2.53729	0.115158	1.39238e-108	4.35934e-107
Xaf1	7662.66	-2.53698	0.0582872	0	0
Nmi	2786.31	-2.53218	0.0806849	2.31632e-217	1.72549e-215
Olfr433	36.6326	-2.52835	0.647866	7.3799e-06	2.35839e-05
Minpp1	11945.2	-2.52579	0.0645762	0	0
Elmod2	3739.41	-2.52167	0.0728523	2.37329e-263	2.20177e-261
Ddx58	31659.9	-2.51992	0.0596701	0	0
Zup1	5692.05	-2.51743	0.0604059	0	0
H2-T10	987.374	-2.51509	0.12269	2.82425e-94	7.68134e-93
Klra2	628.09	-2.51474	0.158352	8.29539e-58	1.40947e-56
Il18	2256.63	-2.51434	0.0812108	1.63649e-211	1.17284e-209
Slfn4	93399.5	-2.51098	0.100885	8.18676e-138	3.42937e-136
Fndc3a	27016.4	-2.51027	0.040178	0	0
Slc25a22	5250.64	-2.50795	0.100509	1.1329e-138	4.77207e-137
Ifi202b	44076.6	-2.49969	0.0507486	0	0
Mid1	694.997	-2.49967	0.155505	4.89922e-59	8.43804e-58
Parp12	18387.1	-2.49716	0.0559138	0	0
BE692007	26.9864	-2.49505	1.16037	0.00147618	0.00363624
Tnfsf4	16.9302	-2.49336	0.998488	0.000851351	0.00216809
Igfbp6	29.3923	-2.49021	0.678797	2.13961e-05	6.52979e-05
1600014C10Rik	2490.5	-2.48503	0.0948783	4.40565e-152	2.1083e-150
Faah	680.285	-2.48382	0.175534	2.2329e-46	3.13519e-45
C1rb	64.9168	-2.48308	0.451434	3.60165e-09	1.5037e-08
C1s1	28.2215	-2.48094	0.820578	0.000158903	0.000440097
Trim21	9375.05	-2.47995	0.0689724	5.20186e-284	5.35119e-282
Sp140	32586.7	-2.47307	0.0796108	2.9262e-213	2.1274e-211
Dck	7256.22	-2.47164	0.0734211	2.35367e-249	2.04553e-247
Shox2	169.736	-2.46738	0.298993	1.69397e-17	1.07046e-16
Fpr2	744.005	-2.46582	0.136764	1.38374e-73	2.95134e-72
Daxx	28477.6	-2.46475	0.0560896	0	0
Parp11	1943.61	-2.46457	0.0865523	2.30598e-179	1.32589e-177
Gramd1b	10015.3	-2.4637	0.050862	0	0
Socs2	25.8948	-2.46155	0.73735	7.2219e-05	0.000208574
Peak1os	263.395	-2.4611	0.227289	2.95852e-28	2.73464e-27
Casp7	2503.79	-2.45973	0.0902616	9.61382e-165	5.06551e-163
Pltp	2192.5	-2.45842	0.0845304	6.49105e-187	3.99015e-185
Hmcn2	125.315	-2.45623	0.320718	1.71035e-15	9.83795e-15
Mfsd7a	2294.83	-2.45585	0.132624	1.7418e-77	3.85644e-76
Muc1	29.8777	-2.45584	0.675673	2.26729e-05	6.90274e-05
Ifi44	52158.9	-2.45563	0.0553656	0	0
Gm6034	17.9379	-2.4556	0.929108	0.000603457	0.00157011
Parp10	6545.43	-2.45365	0.0916611	9.38624e-159	4.71557e-157
Ssc5d	107.209	-2.45247	0.342738	7.77359e-14	4.13044e-13
Ifih1	119472	-2.4511	0.0938198	4.33689e-150	2.04307e-148
Col9a3	45.0991	-2.4493	1.05853	0.000741584	0.00190459
Fgl2	201.808	-2.44548	0.551171	6.80632e-07	2.3875e-06
Kif17	8.62906	-2.43492	2.05611	0.0101965	0.0218891
Fgd2	680.254	-2.43143	0.156805	3.51293e-55	5.71824e-54
Trim34b	1746.31	-2.42794	0.0937244	4.26863e-149	1.98616e-147
Il21r	19.9713	-2.42668	0.92352	0.000628171	0.00163104
4933433H22Rik	13.1816	-2.42487	1.8657	0.00610949	0.0136366
Gm43197	2489.39	-2.42227	0.110081	3.68242e-108	1.15053e-106
Oas1a	16064.4	-2.41967	0.0485376	0	0
G530011O06Rik	155.6	-2.41881	0.306994	3.69179e-16	2.18502e-15
Sema4f	25.76	-2.41667	0.73759	8.62058e-05	0.000246755
Aoah	985.95	-2.41292	0.116956	1.93513e-95	5.37924e-94
Crem	1737.4	-2.41035	0.120193	1.2239e-90	3.17458e-89
Rnf135	1899.11	-2.39671	0.109389	1.24257e-107	3.85835e-106
Abi3bp	7.86409	-2.38916	2.69189	0.0102275	0.0219469
Ddx4	8.61889	-2.38481	2.19005	0.0108085	0.0230955
Gm21860	154.223	-2.38465	0.289118	1.771e-17	1.11821e-16
Entpd1	242.288	-2.38442	0.302339	3.26227e-16	1.93687e-15
Tdrd7	8257.18	-2.38375	0.0677262	3.01441e-272	2.96e-270
Tmem67	1562.14	-2.37841	0.107468	2.21584e-109	7.03947e-108
Mov10	8972.51	-2.37721	0.0583849	0	0
Gm44075	28.7915	-2.37504	0.790354	0.000198706	0.000545128
Cd40	29312	-2.3685	0.0557852	0	0
Gm37842	17.4443	-2.36711	0.924217	0.000752544	0.00193143
Jaml	199.221	-2.3662	0.31724	6.12477e-15	3.4316e-14
Gm29284	3699.54	-2.36548	0.0761073	5.31993e-214	3.90524e-212
Gm3448	42.35	-2.36547	0.540566	1.00236e-06	3.45749e-06
Pax4	6.21355	-2.36209	2.62673	0.015	0.0311708
Gm20559	9451.12	-2.35773	0.0696025	1.05521e-252	9.33152e-251
Serpinb9	344.886	-2.34052	0.204151	1.9475e-31	1.9805e-30
Arid5a	3065.71	-2.33594	0.139515	6.97622e-64	1.28339e-62
Irgm2	26985.9	-2.33439	0.054236	0	0
Dhx58	9145.38	-2.33322	0.0857043	3.91793e-164	2.05719e-162
Tnfsf15	4900.92	-2.33201	0.0937671	2.02945e-137	8.45437e-136
Vnn3	12.321	-2.3303	1.26077	0.00398733	0.00920555
Cox6a2	133.825	-2.32837	0.325129	8.26516e-14	4.387e-13
Ifit1bl2	2540.56	-2.32606	0.130509	4.66221e-72	9.711e-71
Kif5c	313.566	-2.32369	2.12244	0.00497031	0.011277
Dpy19l1	4071.92	-2.32239	0.0885128	1.11288e-152	5.37665e-151
Kcnab1	107.568	-2.32076	0.342801	1.25995e-12	6.31521e-12
Glrp1	285.527	-2.32074	0.207714	6.4231e-30	6.28268e-29
Psmb8	9869.06	-2.32069	0.265737	2.23147e-19	1.5207e-18
Stat1	20710.4	-2.31721	0.0452304	0	0
C3	32612.4	-2.31582	0.075674	1.21141e-206	8.32676e-205
Sass6	14182.5	-2.31308	0.0631429	1.12669e-294	1.20836e-292
Slc39a2	3496.32	-2.30893	0.112964	9.23382e-94	2.49346e-92
Ptpro	2797.37	-2.30605	0.0790726	7.58486e-188	4.72009e-186
Tmem140	2195.52	-2.30196	0.0889651	1.407e-148	6.50661e-147
Mafb	814.037	-2.30026	0.135059	6.43774e-66	1.23074e-64
Ube2l6	5156.56	-2.29465	0.0701196	7.10506e-236	5.77649e-234
Cp	2058.81	-2.29353	0.215097	1.90516e-27	1.72102e-26
Nfxl1	14850.9	-2.29304	0.0744392	2.65113e-209	1.86467e-207
Socs1	1672.04	-2.29254	0.0945861	1.1488e-130	4.51226e-129
Naip6	879.368	-2.29	0.131234	2.74939e-69	5.5141e-68
Gm38375	19.3071	-2.28935	0.86269	0.000639559	0.0016589
Resf1	15737.7	-2.28914	0.0545669	0	0
Sbk3	11.9053	-2.28588	1.38358	0.00475691	0.0108285
Arhgef37	223.719	-2.28544	0.574389	4.55552e-06	1.48116e-05
C130026I21Rik	49818.6	-2.2807	0.0845732	3.84277e-161	1.96984e-159
Rbm43	3197.71	-2.27957	0.0895969	1.15137e-143	5.01759e-142
Prdm9	398.266	-2.2771	0.221009	5.30939e-26	4.59843e-25
Oas1b	1796.07	-2.27709	0.154481	4.0283e-50	6.04325e-49
Aqp9	572.564	-2.2695	0.15686	2.20001e-48	3.17751e-47
Kif19a	19.2355	-2.2679	1.06334	0.0019873	0.00480371
Stat2	24934.8	-2.2672	0.0781037	3.29152e-186	2.00703e-184
Gm21188	92.994	-2.26202	0.443269	3.26721e-08	1.27501e-07
Tnfrsf11a	5171.64	-2.25857	0.110998	5.86242e-93	1.56905e-91
Mppe1	1848.07	-2.25585	0.109825	1.16121e-94	3.1927e-93
Ttc39c	186.627	-2.25512	0.25432	8.34954e-20	5.79448e-19
Fam129a	34052.8	-2.25381	0.0677006	4.61303e-244	3.85404e-242
Bst2	19406	-2.2526	0.0460924	0	0
Trim34a	1568.21	-2.25241	0.0921195	5.08175e-133	2.02761e-131
Pilrb1	86.0875	-2.2499	0.375527	2.19536e-10	9.81616e-10
Lag3	206.414	-2.24828	0.26046	7.12951e-19	4.77046e-18
Oas1g	10415.2	-2.24626	0.0968544	6.04417e-120	2.10599e-118
Slfn8	23911	-2.24514	0.0418454	0	0
Slc9a9	185.94	-2.24186	0.289167	1.03988e-15	6.03883e-15
Gm35154	7.79137	-2.23693	2.07245	0.0123282	0.0260665
Trim12c	4699.54	-2.23669	0.061799	1.19465e-287	1.25455e-285
Gm44958	36.9105	-2.23652	0.597663	1.59534e-05	4.93751e-05
Gja6	9.81402	-2.23626	1.88513	0.00979927	0.0211059
Naip5	665.284	-2.23214	0.15736	1.52961e-46	2.1537e-45
Akr1b7	21.8842	-2.22664	0.780291	0.000356975	0.00095543
Nupr1	21665.1	-2.2258	0.0866517	2.37853e-146	1.0673e-144
Gm9895	25.587	-2.2239	0.8451	0.00057758	0.00150641
Zfp365	54.6448	-2.2236	0.618559	2.46191e-05	7.47119e-05
Stard5	3157.54	-2.21811	0.0811323	1.68703e-165	8.98284e-164
C1ra	1673.68	-2.21537	0.104477	1.2108e-100	3.56915e-99
Casp1	7169.57	-2.21436	0.0571443	0	0
Mir155hg	2024.47	-2.21364	0.141282	3.11982e-56	5.18439e-55
Irgm1	37679.3	-2.21317	0.0383568	0	0
Pcgf5	4319.76	-2.20784	0.0911504	9.73157e-131	3.84232e-129
Arel1	9669.99	-2.20738	0.0779516	1.38702e-177	7.9149e-176
Ugt1a6a	168.61	-2.20687	0.289221	2.46095e-15	1.4022e-14
Ffar4	36.0902	-2.20312	0.630779	3.96014e-05	0.00011756
Parp14	77294.3	-2.20269	0.0370023	0	0
Eif2ak2	20510	-2.20137	0.0574727	0	0
Dusp28	176.111	-2.19996	0.269724	3.44023e-17	2.14087e-16
Gm12764	198.676	-2.19926	0.241111	8.00992e-21	5.75421e-20
Gm37145	13.3285	-2.19607	1.09035	0.00292756	0.00689895
Fam161a	41.6399	-2.19491	0.590425	1.72817e-05	5.33118e-05
Lmo2	7043.97	-2.19123	0.0851916	8.83739e-147	4.01318e-145
Lysmd2	16.2735	-2.19049	0.96932	0.00169055	0.00412996
Yipf7	136.897	-2.19029	0.346873	2.28189e-11	1.0838e-10
Enpp4	9735.03	-2.18764	0.0651807	7.04363e-248	6.05192e-246
Il13ra1	11339.4	-2.18545	0.0634991	2.0402e-260	1.86981e-258
Aif1	341.782	-2.18481	0.198629	4.8239e-29	4.56775e-28
Otud1	996.547	-2.18047	0.13081	2.48307e-63	4.54038e-62
Casp4	8301.61	-2.17307	0.0567087	0	0
Gm15787	22.0917	-2.17223	0.828731	0.000613274	0.00159456
Mx2	16136.1	-2.17155	0.0881598	5.3179e-135	2.16758e-133
Oas2	10063.1	-2.16892	0.0843733	1.25075e-146	5.62913e-145
D16Ertd472e	3145.42	-2.15595	0.111522	3.27715e-84	7.90385e-83
Zbtb8a	240.62	-2.15152	0.225421	1.6365e-22	1.25556e-21
Pde7b	14.742	-2.14986	1.08005	0.00321795	0.00753472
Tbc1d13	6471.85	-2.14929	0.0736228	3.03866e-188	1.89879e-186
Samd9l	33316.6	-2.14702	0.0458045	0	0
Tmem243	2061.63	-2.14647	0.106668	6.69727e-91	1.74314e-89
Enc1	1274.69	-2.14646	0.118942	1.19123e-73	2.54432e-72
4833419F23Rik	47.1092	-2.143	0.537094	6.00966e-06	1.93481e-05
Ccdc40	9.97429	-2.14013	1.54973	0.00519875	0.0117494
Asah2	1311.42	-2.13939	0.102577	1.432e-97	4.10128e-96
Adamts6	13.2143	-2.13432	1.09565	0.00357313	0.00831275
Actg1	159167	-2.13399	0.0475283	0	0
Scimp	1626.92	-2.12657	0.0942844	1.57248e-113	5.18063e-112
Ppp1r15a	33586.1	-2.12514	0.0715334	2.37351e-194	1.54708e-192
Nectin2	13675.9	-2.12412	0.0825178	5.55869e-147	2.53953e-145
Trim26	9698.33	-2.1207	0.0529893	0	0
Atm	3913.93	-2.11874	0.0704607	9.27444e-200	6.12437e-198
Irf8	14299	-2.11772	0.0823214	8.54239e-147	3.8909e-145
Gm42851	97.2794	-2.11534	0.357302	3.3881e-10	1.49809e-09
Fam20a	65.0414	-2.10924	0.493187	1.84903e-06	6.24132e-06
9330159M07Rik	258.498	-2.10909	0.212639	3.89079e-24	3.16666e-23
Tlr8	721.94	-2.10666	0.155555	1.11665e-42	1.47605e-41
Gm13822	128.059	-2.10382	0.306586	7.95751e-13	4.03127e-12
Xkr8	3202.89	-2.09905	0.156862	8.7376e-42	1.13709e-40
Ccl5	88240.3	-2.09856	0.0394583	0	0
Hoxb5	197.909	-2.09673	0.349645	2.33478e-10	1.0421e-09
Rem2	49.303	-2.09297	0.516223	5.2052e-06	1.68406e-05
Gm20125	52.5415	-2.09204	0.579036	2.5902e-05	7.84951e-05
Gm43684	27.2454	-2.08957	0.754625	0.000496832	0.00130936
Rab39	108.342	-2.08901	0.362955	8.37221e-10	3.62245e-09
4933412E12Rik	422.433	-2.08739	0.182102	2.32428e-31	2.3605e-30
H2aw	380.146	-2.08392	0.175904	2.78841e-33	2.94047e-32
Slc30a1	2659.22	-2.08204	0.104877	1.44919e-88	3.66465e-87
Tifa	3390.64	-2.08029	0.0933329	6.22543e-111	2.003e-109
Nsmaf	2376.86	-2.0799	0.136772	3.80228e-53	6.00817e-52
5830408C22Rik	104.142	-2.07885	0.421094	6.13841e-08	2.34644e-07
Ifi35	6491.44	-2.07229	0.0660123	3.60705e-217	2.67382e-215
Casz1	393.047	-2.06632	0.176775	1.82859e-32	1.90966e-31
Gm17435	596.427	-2.06405	0.14072	1.25098e-49	1.86195e-48
Serpine1	26243	-2.05551	0.0591008	5.48904e-266	5.15561e-264
Svbp	934.286	-2.05466	0.129009	3.73292e-58	6.37124e-57
Rab30	80.0469	-2.05456	0.405653	4.41209e-08	1.70203e-07
Ppm1l	4783.21	-2.05288	0.0717994	5.00924e-182	2.93603e-180
Slc4a11	39.159	-2.05259	0.570825	3.26966e-05	9.7928e-05
Itgb7	725.682	-2.04589	0.141916	5.83674e-48	8.38206e-47
E130102H24Rik	109.808	-2.04546	0.350577	6.45787e-10	2.81186e-09
Stx11	6063.23	-2.04443	0.075173	1.08858e-163	5.67638e-162
Pdcd1	340.042	-2.04348	0.192048	2.12718e-27	1.91814e-26
Capn5	1510.75	-2.04096	0.0970433	4.63723e-99	1.34081e-97
Pdlim4	21.1106	-2.03659	0.800031	0.000948903	0.00240116
Cbr2	416.159	-2.03531	0.194931	2.1162e-26	1.85622e-25
Irf1	45092.6	-2.03017	0.075232	3.289e-162	1.7033e-160
Gm18852	365.615	-2.03013	0.212498	1.24453e-22	9.61668e-22
Slc7a7	1715.67	-2.02552	0.0869837	7.50038e-121	2.63769e-119
Neu3	278.801	-2.01531	0.205018	1.05098e-23	8.44022e-23
A530072M11Rik	51.7652	-2.014	0.483313	3.33179e-06	1.1008e-05
Slfn5	43331.2	-2.01186	0.0418817	0	0
Pnp2	359.848	-2.01156	0.230911	3.67883e-19	2.48687e-18
Ikzf1	22822.8	-2.00892	0.0437755	0	0
Ift172	1438.58	-2.00813	0.109801	1.44921e-75	3.16232e-74
Gm8369	28.9259	-2.00647	0.752343	0.000651458	0.00168601
Vrk2	2313.24	-2.00623	0.0887188	3.15633e-114	1.04214e-112
Gm6375	12.4823	-2.00446	1.27985	0.00705544	0.0155596
Tpst1	4934.57	-2.00109	0.0834053	4.81376e-128	1.8244e-126
Hdc	7425.33	-1.99947	0.0655822	5.37196e-205	3.65923e-203
Nos2	26001.3	-1.99796	0.100002	1.00507e-89	2.57605e-88
Tmem229b	11379.9	-1.99773	0.0480679	0	0
Etnk1	24124.5	-1.99743	0.0460564	0	0
Trafd1	15944.4	-1.9946	0.0465398	0	0
Soat2	841.033	-1.99319	0.150835	9.95418e-41	1.26493e-39
Synpo2	29.2892	-1.98819	0.796379	0.000972525	0.00245723
Gm38289	17.2207	-1.98793	0.961064	0.00291165	0.00686467
Gm28651	6.33362	-1.98619	3.94627	0.0158703	0.032826
Mark1	11.0048	-1.97892	1.52604	0.00893668	0.0193889
Cyp27a1	1103.5	-1.97608	0.129814	3.58905e-53	5.67716e-52
Fsd2	8.03039	-1.97406	1.5941	0.0116459	0.0247135
Asph	10372.1	-1.96955	0.0515668	0	0
Gm43815	30.298	-1.96944	0.641754	0.000214617	0.000587409
Marchf5	14711.4	-1.96903	0.048245	0	0
Slc39a8	279.19	-1.9647	0.203976	7.72217e-23	6.00693e-22
Gm45351	380.359	-1.95888	0.181961	6.18964e-28	5.6865e-27
Tap2	8063.31	-1.95824	0.0537749	3.30075e-291	3.51506e-289
Cnp	1131.37	-1.95273	0.11403	1.44903e-66	2.79137e-65
Gm16675	50.6195	-1.95161	0.530169	2.41863e-05	7.34135e-05
Selenow	2962.49	-1.94994	0.0943466	1.01711e-95	2.83777e-94
Oas3	18030.6	-1.9496	0.0571881	1.19036e-255	1.07788e-253
Ap3m2	837.349	-1.94777	0.132153	3.80698e-50	5.7169e-49
Helz2	39078.5	-1.94599	0.080486	5.32244e-130	2.06905e-128
Irf2	10173.2	-1.94587	0.0547725	3.87169e-277	3.82664e-275
2210412B16Rik	17.7248	-1.93932	0.922022	0.0028645	0.00676404
A730011C13Rik	60.5616	-1.93896	0.448133	1.74696e-06	5.91128e-06
Gm36976	76.1666	-1.93853	0.389239	7.13552e-08	2.7125e-07
Mgat4a	6774.35	-1.93581	0.0582449	8.02095e-243	6.66444e-241
Hoxb8	214.375	-1.9348	0.334354	8.8727e-10	3.83461e-09
S1pr2	3764.86	-1.932	0.0709082	2.40724e-165	1.27727e-163
Tmtc4	408.461	-1.93166	0.185317	2.61285e-26	2.27863e-25
Gm20627	25.3657	-1.93095	0.697542	0.000539629	0.0014123
2010110E17Rik	7.09447	-1.93076	2.06934	0.01458	0.0304109
P2rx5	183.359	-1.92747	0.293842	7.01395e-12	3.41374e-11
Txk	61.0742	-1.92746	0.439943	1.31554e-06	4.49166e-06
Aida	9395.23	-1.92398	0.125535	6.20903e-54	9.92526e-53
Tyro3	34.9371	-1.92392	0.588983	0.000113579	0.000321097
Gpat3	2028.7	-1.92372	0.130711	6.79207e-50	1.01693e-48
Khnyn	4888.96	-1.92368	0.0933786	3.89129e-95	1.07576e-93
M1ap	160.635	-1.92234	0.328851	5.2132e-10	2.28042e-09
AW011738	1374.95	-1.92101	0.0960728	8.40008e-90	2.16031e-88
Psd4	56.123	-1.91847	0.494953	1.08726e-05	3.41393e-05
Parp9	17274.3	-1.91614	0.0455378	0	0
Alpk1	8003.79	-1.91233	0.0774174	1.4893e-135	6.1033e-134
Fas	5223.04	-1.91007	0.0576346	9.96036e-242	8.1859e-240
1810019N24Rik	11.0717	-1.9077	1.28444	0.00809222	0.0176887
Isoc1	5806.07	-1.90719	0.0603977	1.02115e-219	7.68248e-218
Tspo	10745.4	-1.90583	0.0598187	9.9316e-225	7.70183e-223
Hhex	4143.95	-1.89909	0.0646259	1.16162e-190	7.38065e-189
Brdt	214.359	-1.89767	0.242882	6.37223e-16	3.73202e-15
AU020206	1083.39	-1.89739	0.149544	7.00926e-38	8.31326e-37
Lacc1	8305.94	-1.89485	0.056282	3.47138e-249	2.99967e-247
2310043P16Rik	2232.13	-1.89424	0.0804479	1.50654e-123	5.3858e-122
F730043M19Rik	533.866	-1.89353	0.233418	6.62211e-17	4.07403e-16
Tcf4	7815.22	-1.89338	0.0638499	4.67322e-194	3.03298e-192
Flt3l	374.66	-1.89281	0.242193	5.8987e-16	3.46005e-15
Omp	12.9556	-1.89017	1.12557	0.00649841	0.0144513
Dtx3l	25747.4	-1.88988	0.0460907	0	0
Ly86	3997.64	-1.88576	0.0655929	1.37735e-182	8.16797e-181
Psmb10	6881.65	-1.88485	0.0817483	1.63036e-118	5.59055e-117
Gm17193	18.5266	-1.88304	0.893139	0.00295651	0.00695959
Gcnt2	34.7529	-1.8795	0.582883	0.000135755	0.000379603
Clec2d	1357.02	-1.87938	0.123255	1.95842e-53	3.10107e-52
Cyp4v3	2776.17	-1.87464	0.0753427	1.34396e-137	5.61417e-136
Dusp6	1474.33	-1.87056	0.140994	5.26098e-41	6.72498e-40
9130230L23Rik	146.189	-1.86779	0.422197	9.60757e-07	3.32082e-06
Lck	889.038	-1.8676	0.120584	5.39081e-55	8.76557e-54
Slc6a4	128.475	-1.86686	0.297752	4.38634e-11	2.04723e-10
9630013D21Rik	7.1583	-1.86324	1.6675	0.0119051	0.0252107
Cysltr1	644.868	-1.86286	0.384259	1.2596e-07	4.7066e-07
Kif9	36.6638	-1.86279	0.586293	0.000153313	0.00042555
Hebp2	33.1654	-1.86117	0.690071	0.000641742	0.00166371
Calcrl	26290.4	-1.85955	0.0436574	0	0
Tcp11x2	11.7545	-1.85945	1.29171	0.00931363	0.0201115
Cdyl	3331.53	-1.85741	0.0961381	5.84927e-84	1.40624e-82
Pla1a	1728.35	-1.8535	0.0893324	1.91765e-96	5.39009e-95
Sema5a	253.954	-1.85099	0.21939	4.42312e-18	2.85962e-17
Plek2	78.1547	-1.85077	0.389914	2.41729e-07	8.84021e-07
Slc12a9	3347.52	-1.85019	0.0760763	1.44836e-131	5.7486e-130
Klf8	1756.18	-1.84297	0.178195	5.29769e-26	4.59092e-25
H2-Q5	2167.04	-1.84242	0.0834295	5.15282e-109	1.62335e-107
Ank2	216.124	-1.84141	0.234207	5.3152e-16	3.12263e-15
Tapbpl	1359.99	-1.84086	0.112546	4.98561e-61	8.88014e-60
Eng	1450.31	-1.83326	0.106475	2.85341e-67	5.58205e-66
H2-T-ps	738.559	-1.83108	0.147152	2.05496e-36	2.34176e-35
Acer3	5439.94	-1.8281	0.0906165	2.10343e-91	5.53185e-90
Dner	997.901	-1.82765	0.110618	3.81487e-62	6.86767e-61
Tmem219	2593.88	-1.82533	0.0912915	9.67761e-90	2.48463e-88
Gm43429	19.4411	-1.824	0.975666	0.00440156	0.0100926
Ggct	621.263	-1.82364	0.295009	6.96412e-11	3.21366e-10
Rap2c	15116.6	-1.82353	0.054539	6.71268e-246	5.70276e-244
Myd88	11481.9	-1.82223	0.0562065	1.67023e-231	1.32237e-229
Tapbp	49195.4	-1.81966	0.0489995	9.02893e-303	9.96609e-301
Serpinb6b	15.6056	-1.81874	0.973383	0.00495153	0.0112377
Gm20005	59.5617	-1.81834	0.448528	6.07155e-06	1.95307e-05
Marcks	5441.83	-1.81747	0.0560656	2.23306e-231	1.75876e-229
Tmem106a	7707.61	-1.81674	0.0533382	4.05736e-255	3.65211e-253
2310001H17Rik	53.9406	-1.81512	1.03629	0.00409486	0.00943668
Fgf2	15.673	-1.81215	1.09131	0.00683658	0.0151286
Gm43196	184.779	-1.81067	0.274801	6.21384e-12	3.03115e-11
Mertk	174.429	-1.80953	0.323156	2.77006e-09	1.16649e-08
Stambpl1	6014.77	-1.80825	0.0765799	3.52702e-124	1.2699e-122
Slc29a3	1328.44	-1.80624	0.128757	1.20161e-45	1.66247e-44
Ankrd66	17.0085	-1.80521	0.88717	0.00362443	0.00841914
Gm11131	259.473	-1.80457	0.277859	9.73214e-12	4.70641e-11
B230307C23Rik	458.372	-1.7993	0.169788	4.1652e-27	3.7292e-26
Bst1	6298	-1.79827	0.0788353	5.55234e-116	1.86999e-114
Tnc	21180.2	-1.7964	0.09662	2.98194e-78	6.69035e-77
H2-Ab1	88.5289	-1.79626	0.497988	3.46978e-05	0.000103561
Fam102b	29440.7	-1.79589	0.0599645	2.51582e-198	1.6541e-196
Rgs14	400.902	-1.79411	0.166733	7.23726e-28	6.62882e-27
Apobec3	2862.02	-1.79328	0.0712776	1.36217e-140	5.78615e-139
Pik3cd	6241.48	-1.79253	0.0548035	1.23922e-235	9.96779e-234
Sting1	2853.53	-1.79139	0.074743	9.16064e-128	3.45454e-126
Phyhd1	591.813	-1.78993	0.185609	7.62652e-23	5.93828e-22
Gm9694	18.1213	-1.78914	0.938574	0.00442779	0.0101496
H2-Q7	1812.66	-1.78729	0.0930991	6.25476e-83	1.48484e-81
Usb1	6453.95	-1.78723	0.0549995	1.2727e-232	1.01294e-230
1700055D18Rik	40.6625	-1.78461	0.531703	9.19386e-05	0.00026227
Plod2	120.63	-1.78242	0.419759	2.75969e-06	9.17388e-06
Asb11	193.082	-1.78064	0.239818	1.49138e-14	8.20395e-14
A330074K22Rik	15.6398	-1.78052	1.40023	0.0107037	0.0228942
Pnpt1	8471.35	-1.77808	0.052651	7.93186e-251	6.97358e-249
H2-Q6	13061.7	-1.7753	0.557869	0.00013619	0.000380678
Nudt13	943.989	-1.77404	0.182835	4.13609e-23	3.24409e-22
Gm43272	8.36627	-1.77354	1.72214	0.0139007	0.0291105
Gm26510	17.4559	-1.77354	0.893671	0.00354624	0.00825527
Evl	3419.65	-1.77285	0.329244	8.91463e-09	3.62287e-08
Gvin1	245.27	-1.77115	0.561086	0.000164295	0.000454616
Tent5d	13.5144	-1.76957	1.29054	0.0100864	0.0216719
Creb5	3610.79	-1.76627	0.0684522	1.0395e-147	4.77792e-146
Pik3r6	2963.85	-1.7661	0.101445	1.11672e-68	2.22491e-67
Lrp4	582.51	-1.76579	0.158907	1.41112e-29	1.35831e-28
Lgals3bp	30962.7	-1.76351	0.0495334	1.51865e-278	1.531e-276
AB124611	5719.06	-1.76343	0.0644106	7.63086e-166	4.10654e-164
Whamm	3261.25	-1.76256	0.0787975	1.32733e-111	4.31655e-110
Sertad3	577.287	-1.76029	0.145714	2.08776e-34	2.27294e-33
Tnfaip3	47069.6	-1.75966	0.0375679	0	0
Ifi207	48615.8	-1.75803	0.0486926	2.81099e-286	2.93157e-284
Birc2	5001.24	-1.75401	0.0613423	1.3208e-180	7.65256e-179
Hoxb3	486.413	-1.75068	0.163228	1.22859e-27	1.11718e-26
Mthfr	8933.61	-1.74724	0.0487246	1.80253e-282	1.84175e-280
Maf	700.456	-1.74531	0.20525	2.67204e-18	1.74241e-17
Gm8979	795.92	-1.74025	0.146786	3.1917e-33	3.36106e-32
Cox18	2112.84	-1.74007	0.106464	7.66054e-61	1.35806e-59
Bcl2a1a	1883.85	-1.7398	0.112033	2.66412e-55	4.36477e-54
Tut7	11599.3	-1.73963	0.0742918	4.51942e-122	1.60429e-120
9330175E14Rik	364.084	-1.73294	0.312527	4.12147e-09	1.71222e-08
Isg15	42047.4	-1.73233	0.072137	1.58702e-128	6.06035e-127
Dock8	9092.94	-1.73223	0.068155	2.66284e-143	1.15711e-141
Fbxw17	2217.64	-1.73218	0.172514	1.44179e-24	1.19402e-23
Rasip1	173.787	-1.72972	0.252716	1.0481e-12	5.27431e-12
Icam2	50.5003	-1.725	0.52955	0.000131708	0.000368926
Zbtb5	1936.4	-1.72419	0.0999474	1.68467e-67	3.30422e-66
Ccdc173	112.565	-1.72072	0.322559	1.35652e-08	5.42967e-08
Zfp800	4325.55	-1.72023	0.0625156	1.4729e-167	7.95469e-166
Gm13230	69.8674	-1.71516	0.515037	0.000103674	0.00029436
Aim2	12652.6	-1.71511	0.143098	5.7241e-34	6.15646e-33
Slc8a1	271.932	-1.71431	0.200289	1.68291e-18	1.10937e-17
Inpp1	2554.48	-1.71259	0.0939602	3.88894e-75	8.44951e-74
Kctd6	484.664	-1.71254	0.152299	3.68658e-30	3.62946e-29
Xrn1	7355.47	-1.7111	0.0765839	2.45554e-111	7.93433e-110
Lgals8	13144.2	-1.70981	0.0705345	1.28455e-130	5.03237e-129
Gm19710	8.39389	-1.70925	1.52803	0.0146821	0.0306021
Cst7	962.752	-1.70494	0.129092	1.31835e-40	1.66829e-39
Ogfrl1	2738.26	-1.7033	0.0775136	6.14727e-108	1.91274e-106
Hpse	111.048	-1.70093	0.444861	1.58102e-05	4.89521e-05
Rin2	5726.74	-1.70013	0.0613736	1.11951e-169	6.08967e-168
Serpina3g	36.7407	-1.7	0.735675	0.00203861	0.00491517
Casp8	5580.27	-1.69844	0.0590979	1.8688e-182	1.10391e-180
D1Ertd622e	17018.1	-1.69829	0.0490456	1.62363e-263	1.51559e-261
Rbms2	2849.79	-1.69767	0.0966113	6.84758e-70	1.3862e-68
Usp25	19723.5	-1.69617	0.0414247	0	0
Leprotl1	9964.89	-1.69481	0.0660132	2.87592e-146	1.28668e-144
Parp3	2388.44	-1.69426	0.0747971	1.84915e-114	6.11878e-113
Frmd4a	5646.8	-1.69375	0.0558635	7.64923e-203	5.16392e-201
Sec24b	17653.8	-1.69306	0.0547173	1.45694e-210	1.02953e-208
Ighm	736.706	-1.69291	0.156831	4.7573e-28	4.37857e-27
Keap1	5476.68	-1.69252	0.0683489	3.91658e-136	1.62264e-134
Mb21d2	1233.75	-1.6914	0.104896	2.65384e-59	4.59169e-58
Rtp4	16300	-1.68979	0.0550217	6.46429e-208	4.48408e-206
Zc3h7a	9619.65	-1.68625	0.0927327	1.09291e-74	2.36438e-73
Fst	66.9902	-1.68591	0.453261	2.30245e-05	7.00274e-05
Mfsd4a	16.0257	-1.68503	1.04246	0.00788124	0.01727
5430427O19Rik	3143.41	-1.68266	0.0722331	6.83564e-121	2.40952e-119
Car13	5918.64	-1.68183	0.071992	1.85459e-121	6.56793e-120
Herc3	1246.09	-1.67934	0.187358	4.70987e-20	3.30346e-19
N4bp1	15120.2	-1.67745	0.057794	5.16085e-186	3.1217e-184
Cacna1d	170.265	-1.6747	0.25524	7.68506e-12	3.73317e-11
Oas1c	375.966	-1.6745	0.176458	3.86149e-22	2.92553e-21
Crybg1	8832.51	-1.67449	0.0546203	2.70525e-207	1.86798e-205
Gm38050	24.2552	-1.67287	0.872821	0.00459121	0.0104829
Ly6e	45627.4	-1.67226	0.044606	0	0
Dennd1b	3443.3	-1.67146	0.0659944	2.29071e-142	9.84096e-141
Rgs18	9.76658	-1.66997	1.31451	0.0132203	0.027801
Gna15	1282.9	-1.66977	0.10014	3.47143e-63	6.33233e-62
Adm	249.113	-1.66957	0.514202	0.000140023	0.00039067
4931414P19Rik	430.76	-1.66394	0.176604	6.41346e-22	4.82029e-21
Zfp39	181.912	-1.65736	0.283873	8.12971e-10	3.52054e-09
Zfas1	3656.86	-1.65647	0.0806096	1.42402e-94	3.90819e-93
Jak2	36036.9	-1.65576	0.0415811	0	0
Serhl	1216.01	-1.6541	0.111069	5.69089e-51	8.623e-50
Adh7	160.834	-1.65375	0.418003	8.73937e-06	2.76942e-05
Slc7a8	4167.97	-1.64664	0.0645577	2.40623e-144	1.0547e-142
Il1rap	3944.32	-1.64351	0.0658258	1.88208e-138	7.90577e-137
Zbtb32	10450.6	-1.64278	0.0689909	4.10608e-126	1.51444e-124
Mitd1	2868.28	-1.64193	0.0829481	6.00701e-88	1.50894e-86
BC028528	2173.55	-1.63682	0.112964	1.91305e-48	2.771e-47
Tnfrsf14	442.433	-1.63385	0.178166	8.02266e-21	5.76062e-20
Gm8399	77.0077	-1.63133	0.371368	1.60816e-06	5.45872e-06
Atp10d	7029.44	-1.63018	0.0702875	9.12492e-120	3.17212e-118
Aff1	15115.3	-1.62788	0.0480273	8.91248e-253	7.92791e-251
Naip1	20.5515	-1.62592	0.781183	0.00379498	0.008791
Rnd1	13698.1	-1.62551	0.114877	2.94911e-46	4.13313e-45
Nmral1	499.403	-1.62471	0.170486	2.26962e-22	1.7334e-21
Trim14	3631.4	-1.62196	0.0689128	3.25435e-123	1.16067e-121
Tor3a	35627.6	-1.62183	0.102633	4.70148e-57	7.89076e-56
Ogfr	11229.2	-1.62135	0.0581048	4.19721e-172	2.34208e-170
Kitl	391.517	-1.62044	0.169515	1.9469e-22	1.48842e-21
Trp53cor1	84.308	-1.61935	0.384668	3.47558e-06	1.14505e-05
Dpf3	9.39183	-1.61911	1.39757	0.0156829	0.0324739
Snx10	17563.3	-1.61853	0.061372	3.99733e-154	1.94365e-152
Slc16a9	15.957	-1.61668	0.960365	0.00818974	0.0178786
Kyat3	126.694	-1.61624	0.320059	6.5923e-08	2.51326e-07
Pttg1	1169.08	-1.61614	0.101674	1.14509e-57	1.93909e-56
Pigv	1384.53	-1.61433	0.0947368	6.72014e-66	1.27987e-64
Fut10	574.522	-1.61359	0.162591	5.47033e-24	4.42839e-23
Lap3	7940.49	-1.61234	0.0524255	1.8713e-208	1.30405e-206
Il7	48.7837	-1.61194	0.505265	0.000178677	0.000492248
Pilra	284.709	-1.60673	0.305382	1.9027e-08	7.52815e-08
Gm8995	66448.6	-1.60586	0.0380133	0	0
Csf3r	386.559	-1.6012	0.213043	7.67923e-15	4.28981e-14
Cdyl2	1848.56	-1.59934	0.100273	4.29956e-58	7.33009e-57
Tasor2	6191.1	-1.59893	0.0709189	2.61109e-113	8.56506e-112
Hlx	379.71	-1.59576	0.168777	5.16511e-22	3.89366e-21
Gm16385	21.6769	-1.59456	0.7817	0.0041811	0.00962499
Gm3912	81.2373	-1.59453	0.892869	0.00574364	0.012877
Atxn7l1	2293.13	-1.59436	0.0811375	9.64224e-87	2.38251e-85
Cth	2538.75	-1.59298	0.0747914	1.95966e-101	5.7992e-100
Naip2	3282.92	-1.59268	0.0664757	1.16213e-127	4.34993e-126
Adar	29257.2	-1.59159	0.0621909	2.82713e-145	1.25372e-143
Eda2r	3438.4	-1.58744	0.0832917	9.57569e-82	2.24154e-80
Rnaset2a	13615.9	-1.58668	0.0847772	6.8219e-79	1.54201e-77
Vopp1	795.644	-1.57898	0.160733	1.54831e-23	1.23229e-22
Tent5a	6862.32	-1.57764	0.0828825	1.77348e-81	4.13866e-80
Ppm1k	7713.65	-1.57676	0.0721403	9.72333e-107	2.99463e-105
Cd46	17.779	-1.57279	0.803212	0.00500374	0.011346
Ppfia4	189.5	-1.57197	0.412752	1.75776e-05	5.41803e-05
Itga4	72615.4	-1.57177	0.0479587	2.40334e-236	1.9645e-234
Gtpbp2	17625.7	-1.57061	0.0896123	1.21995e-69	2.46633e-68
Gpr162	176.272	-1.57051	0.251919	7.065e-11	3.25723e-10
Gm15990	5.62753	-1.57001	4.03108	0.0188625	0.0383911
Hopx	24.919	-1.56874	0.678514	0.00242944	0.00579465
Gm16712	75.0279	-1.56743	0.375514	4.50987e-06	1.46758e-05
Ccnj	1968.01	-1.56341	0.0923604	5.26527e-65	9.90316e-64
Cd300c	11.6356	-1.56165	1.37161	0.0148479	0.0308886
Nudt17	223.869	-1.5607	0.221831	3.40917e-13	1.7577e-12
Mpp1	10409.7	-1.56015	0.0476799	1.16526e-235	9.42303e-234
Lrrc63	48.3042	-1.56009	0.51355	0.000312739	0.000842401
Ktn1	15743.6	-1.55929	0.0629685	4.10895e-136	1.69769e-134
Acsl1	4772.51	-1.55558	0.0615929	1.89206e-141	8.08243e-140
Plxnc1	2635.9	-1.55431	0.0796619	1.35743e-85	3.31616e-84
Rab43	6182.49	-1.55259	0.0603597	1.08331e-146	4.8901e-145
Sfi1	3865.04	-1.55227	0.121039	2.10933e-38	2.52752e-37
Acot1	265.109	-1.55224	0.312925	1.08041e-07	4.05208e-07
Prpf38a	4636.03	-1.55149	0.0642854	2.82354e-130	1.10045e-128
Sgcb	1486.92	-1.54998	0.103781	2.92092e-51	4.43922e-50
Icos	38.4125	-1.54657	0.56185	0.000769069	0.00197116
Fam241a	8400.65	-1.54516	0.0560899	7.47882e-168	4.05357e-166
Mtmr14	12210.3	-1.54358	0.070586	8.97562e-107	2.76999e-105
Cd164	7862.04	-1.54101	0.0528411	1.05681e-187	6.54965e-186
Ppp2r5a	20012.5	-1.53914	0.0523704	1.34805e-190	8.52938e-189
Rmdn3	3683.47	-1.53855	0.0664854	2.83731e-119	9.81825e-118
Snx2	10387.8	-1.53766	0.0578955	4.02026e-156	1.98027e-154
Adamts4	3526.99	-1.53677	0.111082	2.89483e-44	3.91904e-43
Adgb	57.5035	-1.53266	0.483524	0.000222631	0.000608243
Ctso	2167.63	-1.53102	0.0921313	7.90157e-63	1.43961e-61
Wdr66	85.1955	-1.5295	0.379711	8.33423e-06	2.64769e-05
Aldh5a1	55.4197	-1.5289	0.464666	0.00014962	0.000415911
Rnpep	4876.91	-1.52845	0.0615121	5.18937e-137	2.15587e-135
Ncoa7	3364	-1.52428	0.0721075	5.59931e-100	1.63777e-98
Fbxo15	641.579	-1.52382	0.134767	2.1954e-30	2.1784e-29
Gm44710	46.4741	-1.52362	0.536598	0.00059316	0.00154465
Rbl1	2686.79	-1.52147	0.0728628	1.42368e-97	4.08519e-96
H2-Q4	18560.6	-1.52005	0.043394	1.39951e-269	1.35663e-267
Itgb8	42.8039	-1.51915	0.587969	0.00124706	0.00310421
Tagap	4006.98	-1.51832	0.0788434	2.1521e-83	5.14124e-82
Rfx5	3462.87	-1.51621	0.0683249	8.41086e-110	2.68331e-108
Cyp2c55	6.36018	-1.51615	2.1147	0.0205311	0.0415124
Sele	19.5229	-1.51493	1.27083	0.0138006	0.0289128
Asb10	20.1785	-1.51297	0.894369	0.00890265	0.0193206
Cptp	2087.48	-1.51256	0.147892	2.39641e-25	2.03017e-24
Cdkl3	144.768	-1.51121	0.291398	3.63661e-08	1.41297e-07
Txnip	22705.6	-1.51102	0.0692382	2.5506e-106	7.80773e-105
Gsg1	21.468	-1.51093	0.911728	0.00883896	0.0191906
Peli1	38127.7	-1.51076	0.0430757	1.50943e-269	1.45386e-267
Jmjd7	203.666	-1.50955	0.228372	6.81005e-12	3.31557e-11
Letm2	109.465	-1.50799	0.314703	2.80152e-07	1.01887e-06
Gm7967	158.683	-1.50782	0.537089	0.000643288	0.00166715
Nsd3	10268.7	-1.50477	0.0473303	1.35452e-222	1.0345e-220
9130208D14Rik	5025.35	-1.50219	0.0656614	1.35232e-116	4.57489e-115
Ttc7	1596.53	-1.50082	0.0880709	7.83812e-66	1.48905e-64
Dse	7114.79	-1.5004	0.053044	8.54304e-177	4.85669e-175
Rgl1	13143.4	-1.49896	0.061479	4.70541e-132	1.87251e-130
Gm11706	9.40041	-1.49895	3.33559	0.0137165	0.0287525
Cc2d2a	436.699	-1.49844	0.168877	1.18378e-19	8.14056e-19
2500002B13Rik	1694.22	-1.49475	0.0923161	1.09515e-59	1.90794e-58
Zfhx4	4879.67	-1.49348	0.0851577	1.35946e-69	2.74103e-68
Sbds	7113.16	-1.49239	0.071778	9.90192e-97	2.80932e-95
4930518I15Rik	25.5645	-1.49175	0.799159	0.00648055	0.0144158
Tiparp	14679	-1.48847	0.0689747	5.33655e-104	1.59801e-102
Slc43a3	671.69	-1.48763	0.203523	4.72634e-14	2.55165e-13
Cx3cl1	153.781	-1.48625	0.279437	1.84422e-08	7.30635e-08
Zfp455	204.592	-1.48595	0.226056	8.87457e-12	4.3027e-11
Tra2a	8506.75	-1.48334	0.0641876	6.19921e-119	2.13541e-117
Iglon5	12.471	-1.48275	1.06873	0.0139983	0.0292987
Gm14379	25.0377	-1.48229	0.777549	0.00604935	0.0135123
Kat2b	2182.16	-1.48049	0.0915873	1.4416e-59	2.50286e-58
4930458D05Rik	9.99551	-1.47834	2.11184	0.0182534	0.0372708
Filip1l	9830.46	-1.47687	0.0477025	3.59196e-211	2.56215e-209
Vps54	5651.04	-1.47414	0.060053	9.46277e-134	3.81589e-132
Polr2g	5306.06	-1.47316	0.0658014	1.04697e-111	3.41212e-110
Tpbg	623.965	-1.4731	0.14393	2.55724e-25	2.164e-24
Cenpj	1003.03	-1.47187	0.120813	7.4824e-35	8.247e-34
Cpeb3	532.85	-1.47149	0.19713	1.54922e-14	8.51899e-14
Tex14	20.1884	-1.4711	0.774381	0.00654803	0.0145488
Ccdc25	3050.71	-1.46965	0.0765263	7.10594e-83	1.68426e-81
Man2a1	5113.71	-1.4682	0.0585278	1.23129e-139	5.20101e-138
H2-DMb2	63.506	-1.46735	0.42899	9.55406e-05	0.000272135
4930471E19Rik	74.1872	-1.46728	0.380871	1.92352e-05	5.90009e-05
Actg-ps1	44.655	-1.46702	0.497029	0.000474714	0.00125479
AI504432	206.281	-1.46346	0.27312	1.54097e-08	6.13386e-08
Dclre1c	1703.57	-1.46283	0.084382	4.91534e-68	9.66577e-67
Plscr1	2168.29	-1.46067	0.0843999	8.33554e-68	1.63701e-66
Phc2	9140.88	-1.45553	0.0531548	8.39251e-166	4.50041e-164
Zfp493	91.4304	-1.4554	0.393334	3.43077e-05	0.000102489
Pnp	19340.2	-1.45492	0.800053	0.00679864	0.0150482
Slc52a3	26.1341	-1.45403	0.676721	0.00407094	0.0093857
Ttc39b	7700.45	-1.45374	0.0755493	2.7945e-83	6.65488e-82
Trib3	5982.76	-1.45176	0.0629208	1.52066e-118	5.22624e-117
Gm42462	45.8194	-1.45052	0.497609	0.000531999	0.00139354
Tspan13	364.197	-1.44914	0.20643	3.74503e-13	1.92758e-12
Bambi	11.523	-1.44823	1.56358	0.0175916	0.0360559
Trex1	18190.8	-1.44494	0.0561501	1.05484e-146	4.77585e-145
Creb3l4	87.9917	-1.44476	0.42744	0.00012067	0.000339303
Atp8a1	1740.2	-1.44124	0.142363	8.25883e-25	6.881e-24
Mex3b	19.8846	-1.43914	0.781821	0.00765783	0.0168121
Azi2	8604.74	-1.43876	0.0745412	1.05749e-83	2.53832e-82
Psme1	10492.3	-1.43605	0.0462712	3.29261e-212	2.37099e-210
Arl4a	624.986	-1.43334	0.146706	2.96376e-23	2.3367e-22
Klf3	3240.88	-1.42873	0.0996886	2.80544e-47	4.00225e-46
Icam1	79406.7	-1.42843	0.0459734	9.0381e-213	6.53943e-211
Rnaset2b	8732.21	-1.42773	0.0906922	1.53465e-56	2.56148e-55
Tlr9	1752.3	-1.42545	0.0904567	1.23868e-56	2.06976e-55
Cutc	435.07	-1.42487	0.159772	9.25143e-20	6.39983e-19
Tmem200b	9.01316	-1.42435	1.36433	0.0202864	0.0410397
Znfx1	43581.9	-1.42394	0.220004	1.76517e-11	8.42578e-11
Stk40	21322.6	-1.42354	0.0532051	2.0253e-158	1.01078e-156
Casp2	2570.54	-1.42271	0.0899014	4.04973e-57	6.80444e-56
Tbc1d1	8715.71	-1.42023	0.0485993	1.52302e-188	9.55648e-187
Gm17745	19.3357	-1.41768	0.780081	0.00830407	0.0181073
Gipc3	16.479	-1.41612	0.880061	0.0117917	0.0249845
Bckdhb	943.777	-1.41398	0.119795	8.03964e-33	8.43688e-32
Arsg	63.9382	-1.41118	0.514712	0.000953075	0.00241131
Sppl2a	30147.7	-1.40925	0.0407417	8.92576e-263	8.23021e-261
Tmem71	103.496	-1.40793	0.329961	3.5422e-06	1.16624e-05
Carmil1	101.39	-1.40623	0.495899	0.000709386	0.0018278
H2-Q10	1015.44	-1.40494	0.172628	7.42116e-17	4.56005e-16
Cab39l	3905.53	-1.40479	0.0814863	2.33224e-67	4.56842e-66
Ripk2	16530.2	-1.40387	0.0420299	2.67291e-245	2.25809e-243
Tor1aip2	21399.5	-1.40293	0.0541466	1.13026e-148	5.24288e-147
Fut8	668.428	-1.40258	0.151711	4.27353e-21	3.10544e-20
Uaca	1176.19	-1.40193	0.0998762	1.83521e-45	2.5275e-44
Gm43633	9.65899	-1.39917	1.38185	0.0202444	0.0409657
Slfn10-ps	4228.69	-1.39893	0.0684713	1.73335e-93	4.664e-92
Gm48278	14.9076	-1.3967	1.92853	0.0182563	0.0372718
2610002M06Rik	2067.87	-1.39597	0.0826913	1.19762e-64	2.22761e-63
Arrdc4	506.659	-1.3948	0.166943	1.35568e-17	8.59608e-17
1110002J07Rik	767.038	-1.39461	0.201065	7.27867e-13	3.69852e-12
Stoml1	1040.24	-1.39446	0.141893	1.8125e-23	1.43953e-22
H2-Bl	1345.17	-1.39322	0.104627	3.99529e-41	5.11573e-40
Actr3	40855.9	-1.39282	0.0376803	8.28074e-300	9.07401e-298
H2-K1	48005.3	-1.39273	0.312318	1.46544e-06	4.98545e-06
Tslp	844.412	-1.39215	0.11539	3.43542e-34	3.71872e-33
Tor1aip1	13758.8	-1.39203	0.0478727	1.00783e-186	6.17019e-185
Flrt2	5788.08	-1.3894	0.0746008	4.43919e-78	9.93038e-77
Wdyhv1	453.008	-1.3886	0.206917	3.45077e-12	1.70475e-11
Apobec1	17509.2	-1.3884	0.0479738	7.83204e-185	4.68127e-183
Gm41611	22.7049	-1.38737	0.737002	0.00777197	0.0170478
Selplg	907.124	-1.38536	0.128519	8.95044e-28	8.17322e-27
Cped1	30.3	-1.38507	0.763361	0.00780524	0.0171159
Slc4a3	39.8381	-1.38435	0.55513	0.00184052	0.00447394
Frmd4b	5454.14	-1.38403	0.0728689	4.60685e-81	1.07177e-79
Grn	65998.7	-1.38212	0.0513003	1.30739e-160	6.65668e-159
Ehd4	10356.5	-1.38088	0.0544079	9.96028e-143	4.29115e-141
B2m	74483.4	-1.38025	0.0427479	2.06894e-229	1.61271e-227
Srgap2	9364.23	-1.37999	0.0522036	1.07884e-154	5.2797e-153
Cemip2	4517.48	-1.37755	0.0672072	5.13127e-94	1.39059e-92
Hps3	2971.89	-1.37712	0.0860751	2.92918e-58	5.01642e-57
Cds1	829.023	-1.3765	0.124794	5.1686e-29	4.88192e-28
Gm38345	515.805	-1.37463	0.176002	1.22533e-15	7.09397e-15
Plxnb3	23.0957	-1.3732	0.688848	0.00624226	0.0139165
Dennd6b	381.28	-1.36912	0.207335	8.1703e-12	3.96761e-11
Gm44672	24.2259	-1.36852	0.679089	0.00611872	0.0136544
Csrp1	1647.04	-1.36814	0.087961	3.22743e-55	5.26485e-54
Morrbid	793.562	-1.3656	0.153615	1.13117e-19	7.79295e-19
Cdk5r1	1397.02	-1.36524	0.0992243	1.01412e-43	1.35833e-42
Gm38250	8.89123	-1.36439	1.42138	0.022727	0.0454697
Mcm10	958.343	-1.36219	0.14	4.44041e-23	3.47736e-22
Fam53c	10003.5	-1.36123	0.0552103	7.5825e-135	3.08233e-133
Mob3c	2732.03	-1.36114	0.0703508	4.69855e-84	1.13139e-82
Gm16589	6.19741	-1.36091	2.07253	0.0227596	0.045524
Smg7	9578.75	-1.36046	0.073886	2.25068e-76	4.95411e-75
Ccnd3	3925.27	-1.36042	0.0652443	3.11861e-97	8.88128e-96
Cd47	22355.7	-1.36034	0.0446532	1.8271e-204	1.23898e-202
0610038B21Rik	59.8701	-1.35817	0.416341	0.000197633	0.000542593
Gm4673	102.942	-1.35773	0.326518	6.17137e-06	1.9835e-05
Zhx2	248.526	-1.35752	0.209349	1.85935e-11	8.86974e-11
Lipe	3254.1	-1.3568	0.11685	6.98568e-32	7.15701e-31
Vamp1	938.646	-1.35641	0.149986	2.94035e-20	2.07098e-19
Gm8810	1145.1	-1.3559	0.124927	3.97346e-28	3.66382e-27
Mafk	11828.4	-1.35547	0.0563644	1.32707e-128	5.08051e-127
Zfp654	2895.34	-1.35542	0.0757363	2.44598e-72	5.12301e-71
Ebi3	4858.8	-1.3552	0.0679645	3.64515e-89	9.26418e-88
Scarb2	4918.59	-1.35471	0.0618769	6.81113e-107	2.1063e-105
Gm1966	148.885	-1.35433	0.273959	1.48076e-07	5.49633e-07
Pde7a	1628.49	-1.35278	0.131863	2.36654e-25	2.00599e-24
Rnf139	4630.66	-1.35247	0.0607448	1.62429e-110	5.20394e-109
Usp21	3903.55	-1.35188	0.0846355	4.45366e-58	7.58426e-57
Clca3a1	30.2476	-1.35131	0.686032	0.00678429	0.0150186
Itm2b	18693.4	-1.35074	0.048325	1.63207e-172	9.14077e-171
4932438A13Rik	5386.6	-1.3496	0.0569343	7.20039e-125	2.62372e-123
Gm45838	48.4142	-1.34916	0.722071	0.0081317	0.0177622
Gm42457	15.2486	-1.34863	0.962222	0.0168285	0.034628
Abcc2	11.4918	-1.34847	1.7594	0.0187705	0.0382235
Ak1	35.8189	-1.34562	0.564497	0.00275157	0.0065106
Cerkl	94.3864	-1.34553	0.381938	7.88769e-05	0.000226936
Gm49579	11.3242	-1.34466	1.17083	0.0204461	0.0413517
Ikzf5	3918.61	-1.34418	0.0810081	1.71129e-62	3.09917e-61
Tm4sf5	35.8504	-1.34211	0.598514	0.00369712	0.00858008
Loxl3	489.313	-1.34082	0.299974	1.52781e-06	5.19066e-06
C5ar2	39.5846	-1.33964	0.577	0.0031232	0.0073246
Tmem209	2601.36	-1.33857	0.0952535	1.41746e-45	1.95751e-44
Dcp2	11782.8	-1.33773	0.0719596	9.05656e-78	2.01106e-76
Rab8b	27052.1	-1.33665	0.0501673	4.32003e-157	2.14188e-155
H2-M3	2381.66	-1.33419	0.0878123	9.16004e-53	1.43245e-51
Trmt61b	487.528	-1.3327	0.183646	8.77328e-14	4.64692e-13
H2-D1	110904	-1.3309	0.0355147	5.05449e-308	5.66178e-306
Ppm1e	34.0419	-1.33025	0.560938	0.00287233	0.00677831
Gm14010	12.3701	-1.33001	1.02466	0.0191389	0.0389056
Sdc4	234361	-1.3295	0.0779391	6.57819e-66	1.25442e-64
Htra4	136.055	-1.3291	0.285611	6.72664e-07	2.3601e-06
Gm2396	31.7	-1.32895	0.579938	0.00344929	0.00804443
Gm8909	1278.69	-1.32782	0.0941014	7.01121e-46	9.7448e-45
Tcea1	14529.6	-1.32752	0.0495924	1.66998e-158	8.36206e-157
Bend6	81.4562	-1.32665	0.352969	3.30067e-05	9.87784e-05
Bfar	3242.11	-1.32376	0.0729106	2.69383e-74	5.80286e-73
Gm20703	42.8867	-1.32174	0.497682	0.00136515	0.00338091
Flnb	42560.4	-1.32064	0.0414061	6.0211e-224	4.62188e-222
Washc4	13531.3	-1.31931	0.0481929	1.0618e-165	5.67367e-164
Prrx2	10.4713	-1.31913	1.18119	0.0223489	0.0447867
Nod2	6449.63	-1.31762	0.071919	1.29312e-75	2.82988e-74
Il12b	91.715	-1.3168	0.655694	0.00632449	0.0140936
Tmco4	432.189	-1.31655	0.163408	1.69132e-16	1.02019e-15
Tmem86b	157.761	-1.31609	0.256965	6.40484e-08	2.44457e-07
Slamf7	1333.69	-1.31251	0.15271	1.77469e-18	1.16631e-17
Trim5	15.9677	-1.31135	1.11291	0.0199399	0.0403928
Gm33370	124.794	-1.31104	0.296931	2.11353e-06	7.09453e-06
Capza2	23797.7	-1.30979	0.0482977	1.35953e-162	7.06486e-161
Fmr1	4529.33	-1.30797	0.0773802	9.00943e-65	1.68406e-63
Igsf3	3242.24	-1.30556	0.0741967	6.72476e-70	1.36316e-68
Lnpk	2633.47	-1.30455	0.1509	1.10856e-18	7.35248e-18
Ccng2	7152.52	-1.3018	0.0904677	1.40483e-47	2.01173e-46
Actr3-ps	37.0817	-1.30119	0.600796	0.00490452	0.0111377
Rpl17-ps8	43.3176	-1.30032	0.575794	0.00396677	0.00916229
Zfp658	400.597	-1.30003	0.163275	3.82735e-16	2.26348e-15
Gm11425	429.339	-1.30001	0.161587	1.91661e-16	1.1524e-15
Tmem191c	64.7164	-1.29936	0.435532	0.000517697	0.00135984
Gpr65	769.405	-1.29804	0.122484	7.27917e-27	6.48266e-26
Il5ra	6.73018	-1.29718	2.42679	0.021906	0.0439888
H2-K2	4823.91	-1.29711	0.0770861	3.73384e-64	6.90258e-63
Npc2	44988	-1.2962	0.054686	1.59297e-124	5.77672e-123
Nrp1	389.303	-1.29593	0.162621	3.63612e-16	2.15292e-15
Prkx	10755.9	-1.2957	0.0504205	2.88923e-146	1.28882e-144
Nampt	26478.9	-1.29409	0.0453325	7.25877e-180	4.18959e-178
Gyg	2672.82	-1.29158	0.0823217	4.44636e-56	7.36449e-55
Smox	14767.8	-1.28907	0.0476952	1.54155e-161	7.92901e-160
Aopep	3026.78	-1.288	0.102885	1.43337e-36	1.64084e-35
Pxk	3236.51	-1.28601	0.071804	2.72039e-72	5.68987e-71
Cd74	45441.6	-1.28486	0.0542921	2.01157e-124	7.27726e-123
Extl1	127.477	-1.28368	0.289094	1.87365e-06	6.32017e-06
Cox15	3200.21	-1.27898	0.0834234	1.00309e-53	1.59671e-52
Sgk3	6608.33	-1.27869	0.0539821	1.13506e-124	4.12606e-123
1700123M08Rik	23.5048	-1.27808	0.682505	0.00913898	0.0197852
9430037G07Rik	45.7268	-1.27733	0.500357	0.00188962	0.00458592
Agrn	15619.9	-1.27732	0.114096	1.05979e-29	1.026e-28
Kcna3	52.9398	-1.27706	0.462833	0.0010825	0.00271469
Actr3b	59.9332	-1.27606	0.460069	0.00103145	0.00259699
Cmtr1	9831.86	-1.27603	0.293217	2.9739e-06	9.86861e-06
Ids	2987.41	-1.2758	0.0767886	1.17151e-62	2.12673e-61
Tlk2	8640.38	-1.27558	0.0498999	9.58876e-145	4.22744e-143
Msrb3	16.9088	-1.27337	0.843082	0.0164213	0.0338638
Slc37a1	1306.26	-1.27111	0.100286	1.77842e-37	2.08153e-36
Cdkn1a	62905.3	-1.27094	0.0388599	1.27148e-234	1.01732e-232
Rnf31	5372.89	-1.2707	0.101289	3.12304e-36	3.5482e-35
Rnase4	562.323	-1.27029	0.144013	2.76889e-19	1.88185e-18
Dnaaf3	311.588	-1.26986	0.193259	1.14586e-11	5.52363e-11
Pts	612.636	-1.26955	0.147002	1.2814e-18	8.48021e-18
Pld1	1016.76	-1.26862	0.108259	2.41565e-32	2.51062e-31
Naaa	561.025	-1.26786	0.179577	3.75002e-13	1.92949e-12
Tnfrsf13b	18.4208	-1.26702	0.858673	0.0170703	0.0350729
2310015A10Rik	43.3099	-1.26695	0.543499	0.00346954	0.00808793
Actr2	55848.5	-1.26415	0.0371287	1.20377e-254	1.07713e-252
Gm28404	18.8788	-1.26375	0.972142	0.0212187	0.0427313
Usp42	2559.81	-1.26368	0.0727438	3.36085e-68	6.64351e-67
2700069I18Rik	21.4748	-1.26265	0.919069	0.0186009	0.0379036
Hoxb7	738.331	-1.26206	0.12168	8.02124e-26	6.89581e-25
Ttc39a	27.1718	-1.26117	0.664825	0.00900089	0.0195142
Sap30	19174.2	-1.25886	0.0526263	4.61786e-127	1.71998e-125
Pagr1a	9.11259	-1.25782	1.36052	0.0273647	0.0538367
Txlnb	33.1244	-1.25774	0.575689	0.00499611	0.0113304
Calml4	22.741	-1.25678	0.751082	0.0133012	0.0279557
Adhfe1	653.082	-1.25602	0.135636	4.68942e-21	3.40112e-20
Xiap	16336	-1.25582	0.0436821	2.20311e-182	1.29632e-180
Lyn	20622.8	-1.25544	0.0426353	3.49915e-191	2.24213e-189
Rnf114	13261.8	-1.25538	0.0557655	8.25557e-113	2.70218e-111
Aldh1l1	155.7	-1.25537	0.257914	2.535e-07	9.24608e-07
Tmem116	69.3582	-1.25327	0.489596	0.00182423	0.00443577
Fez2	1611.24	-1.25311	0.0934632	1.33357e-41	1.72804e-40
Rps18-ps3	1555.48	-1.25064	0.236745	2.88955e-08	1.13231e-07
Evi2	429.184	-1.25038	0.157884	5.65685e-16	3.32076e-15
Herpud2	6316.25	-1.25034	0.0569275	1.47129e-107	4.55918e-106
Ptpn18	863.91	-1.25017	0.171424	6.69082e-14	3.57774e-13
AI606473	30.6154	-1.24929	0.617173	0.00717982	0.0158178
2410006H16Rik	3570.16	-1.24553	0.0979585	1.25043e-37	1.4681e-36
Gm12655	38.6099	-1.24544	0.544918	0.00389727	0.00901139
Pycr1	551.603	-1.24512	0.145354	2.52476e-18	1.64993e-17
Ddx19b	3705.8	-1.24385	0.183009	2.43999e-12	1.21294e-11
Katna1	4072.81	-1.24233	0.0713057	1.27475e-68	2.53641e-67
Pstpip1	8219.29	-1.2423	0.0753706	1.2596e-61	2.25683e-60
Esyt1	9983.66	-1.24158	0.0601605	3.73996e-95	1.03582e-93
Ccr9	48.0659	-1.24152	0.483414	0.00196237	0.00474875
Clic4	203675	-1.24047	0.0410014	8.41546e-202	5.6061e-200
Oasl1	66013.3	-1.23961	0.0607718	2.8013e-93	7.52419e-92
Itga6	90.6559	-1.23949	0.363363	0.000135781	0.000379605
Nemp1	1235.16	-1.23929	0.119188	6.38318e-26	5.5158e-25
2810403D21Rik	63.1761	-1.23629	0.441813	0.000993378	0.00250699
Rnf14	7429.95	-1.23565	0.0814348	1.201e-52	1.87425e-51
Shisa5	13759.7	-1.23464	0.0511867	3.6189e-129	1.39249e-127
Pdgfrl	20.2639	-1.23283	0.83712	0.018863	0.0383911
Idnk	831.851	-1.23253	0.138574	1.36915e-19	9.38544e-19
Cfap126	21.5906	-1.23233	0.760389	0.0147701	0.0307479
Gm10499	4568.53	-1.23207	0.087044	2.7021e-45	3.70119e-44
Gda	3224.84	-1.2315	0.147821	1.95705e-17	1.23311e-16
Plekhh1	280.3	-1.23108	0.198004	1.22774e-10	5.58538e-10
Zeb2os	267.792	-1.23074	0.220029	5.13106e-09	2.11595e-08
H2-Q2	3707.48	-1.2291	0.0623402	3.82253e-87	9.50728e-86
Pyroxd2	213.702	-1.22832	0.299292	9.24243e-06	2.92149e-05
BC051226	126.632	-1.22733	0.286403	4.12722e-06	1.34886e-05
Chmp4b	16846.7	-1.22615	0.0475029	1.74997e-147	8.0191e-146
Ppa1	3980.22	-1.22578	0.0694624	2.9224e-70	5.94785e-69
Gm8989	524.474	-1.22363	0.186864	1.43118e-11	6.87056e-11
Tmem51	568.499	-1.2231	0.163483	1.87676e-14	1.02939e-13
Stx16	4000.27	-1.22269	0.0748212	1.23476e-60	2.18387e-59
Vgf	292.691	-1.22223	0.204732	5.48701e-10	2.39534e-09
Hfe	475.39	-1.22155	0.320454	2.96338e-05	8.91608e-05
Gk5	726.415	-1.22019	0.12824	4.82152e-22	3.64009e-21
Fbxo7	996.351	-1.21839	0.175198	8.44802e-13	4.26975e-12
3830406C13Rik	902.294	-1.21785	0.113925	2.73323e-27	2.45731e-26
Tgfb3	16.2974	-1.21615	0.890273	0.0211871	0.0426733
Crlf3	13626.7	-1.21419	0.0466241	3.16646e-150	1.49635e-148
4930440I19Rik	183.131	-1.21418	0.265804	1.17322e-06	4.01844e-06
Irf5	17295.9	-1.2139	0.0531293	4.91743e-116	1.65985e-114
Trim46	314.647	-1.21364	0.196596	1.64867e-10	7.43326e-10
Maml2	560.079	-1.21346	0.18807	2.44919e-11	1.15993e-10
Stard3nl	3298.22	-1.2128	0.0676575	1.84965e-72	3.89018e-71
Rab29	721.672	-1.21181	0.124301	4.66584e-23	3.65201e-22
Ccdc159	93.8181	-1.21161	0.383258	0.000345594	0.000925787
Phyh	2039.06	-1.21098	0.0780567	7.10574e-55	1.15293e-53
Fos	1655.06	-1.21078	0.0964731	1.05047e-36	1.20709e-35
Mtmr7	433.135	-1.21046	0.1601	9.86164e-15	5.4766e-14
Gm11127	4999.06	-1.21032	0.0645337	4.13755e-79	9.38051e-78
Cln3	13063.4	-1.21003	0.125669	1.48059e-22	1.13883e-21
Phlpp1	1987.16	-1.20997	0.0786752	5.57597e-54	8.93218e-53
Rdh9	30.7262	-1.20927	0.612113	0.00848756	0.0184861
Col4a5	3908.52	-1.2077	0.0656497	3.38145e-76	7.42151e-75
Dusp10	298.958	-1.20667	0.188395	3.73402e-11	1.75088e-10
Junos	14.9404	-1.20599	0.933883	0.0233267	0.0465795
Selenbp1	157.905	-1.20508	0.298609	1.28736e-05	4.01805e-05
Cggbp1	16204	-1.20453	0.059279	2.2336e-92	5.9257e-91
Triobp	3798.4	-1.20336	0.0663192	3.72929e-74	7.99919e-73
Fgfbp3	124.686	-1.20211	0.312763	2.87185e-05	8.65619e-05
Gadd45b	17349	-1.20017	0.0714623	7.4135e-64	1.36217e-62
Cd300e	935.091	-1.20013	0.112743	4.62498e-27	4.1384e-26
Naa20	9741.98	-1.19973	0.0468107	1.75316e-145	7.79743e-144
Abtb2	3212.68	-1.19931	0.0892586	9.51772e-42	1.23755e-40
Usp11	222.189	-1.19806	0.225736	2.66533e-08	1.04689e-07
C3ar1	13570.1	-1.1973	0.0451551	8.38529e-156	4.11696e-154
Gcc1	1328.41	-1.19683	0.0988108	2.17256e-34	2.36356e-33
Nphp1	390.994	-1.19512	0.178079	4.65843e-12	2.28568e-11
Pdk3	1299.18	-1.1948	0.0943113	2.30338e-37	2.68556e-36
Fhit	25.9064	-1.1932	0.656856	0.0117472	0.0249075
Col7a1	47.1602	-1.19252	1.00447	0.0231575	0.0462843
Lrrc8c	1847.9	-1.19185	0.0924984	1.46215e-38	1.7562e-37
Gm49356	22.4389	-1.18955	0.965272	0.0253164	0.0502459
Ppip5k2	7235.29	-1.18874	0.0934298	1.0911e-37	1.28402e-36
Gm12258	105.816	-1.1886	0.435497	0.00133063	0.00330027
Plcl2	3692.13	-1.18827	0.0620855	3.21376e-82	7.54635e-81
Ankfy1	14946.9	-1.18686	0.0815767	1.50486e-48	2.19023e-47
Bcl2a1b	25848	-1.18657	0.0391218	1.21419e-202	8.16043e-201
Tmod3	11902.1	-1.18596	0.0499437	3.8234e-125	1.39656e-123
Zfp119b	367.05	-1.18585	0.177135	5.63778e-12	2.75637e-11
Shfl	2048.21	-1.18491	0.159816	3.1995e-14	1.74164e-13
Scarf1	2398.2	-1.18306	0.0765124	1.61007e-54	2.59846e-53
Stard3	6638.59	-1.18072	0.0594872	3.17821e-88	8.01015e-87
Aldh1l2	4300.68	-1.17837	0.0684767	6.3265e-67	1.2281e-65
Parp4	5536.19	-1.17821	0.0561195	1.55668e-97	4.44992e-96
Cacnb3	59.8564	-1.17714	0.484195	0.00307634	0.00722366
Ppp6r1	14914.1	-1.17416	0.0642175	3.07546e-75	6.69167e-74
Acot2	509.57	-1.17361	0.167607	6.33053e-13	3.22324e-12
Lrch1	3660.43	-1.17213	0.0738025	2.11924e-57	3.57271e-56
Vcpip1	15679.1	-1.17111	0.0489243	2.64257e-127	9.86691e-126
Hoxb6	286.124	-1.16919	0.198805	1.012e-09	4.36368e-09
H2-Q1	834.259	-1.16859	0.199099	1.103e-09	4.74659e-09
Laptm4b	79.1025	-1.16577	0.381812	0.000509826	0.0013408
Tigd2	1305.09	-1.16443	0.113957	4.65116e-25	3.90749e-24
H2-Eb1	24.7273	-1.16321	0.962827	0.0265393	0.052422
Nbas	1465.29	-1.16281	0.0990255	1.98255e-32	2.06474e-31
1300002E11Rik	80.0972	-1.16269	0.66387	0.0133831	0.0281082
Chst1	48.6837	-1.16251	0.534123	0.00597775	0.0133642
Lpcat3	3436.49	-1.1617	0.0774119	1.88804e-51	2.87811e-50
Cpne8	5736.64	-1.16133	0.0591743	2.53064e-86	6.2225e-85
Nova1	178.099	-1.15779	0.304319	3.41996e-05	0.000102187
Slc25a28	1906.98	-1.15595	0.0873666	1.59776e-40	2.0168e-39
Msh3	562.072	-1.15573	0.185346	1.29063e-10	5.85742e-10
Mfsd6l	21.7715	-1.15542	0.797412	0.0216889	0.043591
Syne2	353.79	-1.15496	0.278966	8.33349e-06	2.64769e-05
Mrpl13	2998.86	-1.15449	0.072548	1.50803e-57	2.54514e-56
Esr1	60.5814	-1.15443	0.40182	0.000929106	0.0023554
H3f3b	93113.8	-1.1525	0.0515017	4.1791e-109	1.3221e-107
Caml	2336.41	-1.15245	0.0729834	1.01645e-56	1.70031e-55
Gm28035	66.854	-1.15215	0.553625	0.00719058	0.0158392
Phkg1	38.1777	-1.1511	0.549144	0.00724374	0.015947
Tefm	959.243	-1.14798	0.106021	7.03283e-28	6.44939e-27
Rbms1	14786.5	-1.14676	0.0541725	5.35374e-100	1.56898e-98
Dync1i2	12999.5	-1.14615	0.0499066	3.16649e-117	1.07604e-115
Cflar	64134.5	-1.14565	0.0466986	1.42403e-133	5.72717e-132
Pdcd2	1715.03	-1.14557	0.106007	9.30093e-28	8.48303e-27
Clec4a3	163.133	-1.14351	0.262207	3.25777e-06	1.07752e-05
Clec4a1	217.096	-1.14256	0.336843	0.000170785	0.000471624
Gm6485	9.31701	-1.14144	1.31257	0.0316827	0.0612903
Rufy3	3060.02	-1.14137	0.0893895	7.15818e-38	8.47658e-37
Gm28177	5.43127	-1.14053	2.52361	0.0213065	0.0428852
Nudt19	1292.97	-1.13974	0.243548	7.26876e-07	2.54323e-06
Cgas	4397.35	-1.13924	0.0631952	3.28141e-73	6.94979e-72
Hipk3	8223.42	-1.13826	0.0575051	9.02576e-88	2.25973e-86
Ctnnal1	267.988	-1.13755	0.216671	4.00908e-08	1.5529e-07
Itpr1	2325.02	-1.13588	0.0856893	1.24788e-40	1.58044e-39
Akt3	6664.5	-1.13362	0.0949512	2.05918e-33	2.18366e-32
Nr3c1	8672.41	-1.13311	0.0563744	2.2448e-90	5.80271e-89
Rapgef2	20769.1	-1.13193	0.0792925	8.77516e-47	1.24017e-45
Zfp791	20.438	-1.13134	0.747688	0.0210465	0.0424128
Crnde	88.6617	-1.13087	0.401805	0.001176	0.00293858
Gm42653	14.0919	-1.13062	0.95024	0.0302488	0.0588551
Anxa7	27072.4	-1.12946	0.0434774	3.51783e-149	1.64481e-147
Mcm9	884.91	-1.1285	0.207292	1.37423e-08	5.49908e-08
Grik5	41.3712	-1.12673	0.540796	0.00769976	0.0169017
Tnfrsf1a	9815.97	-1.12663	0.0594753	1.36301e-80	3.1516e-79
Rps13-ps1	296.02	-1.126	0.390417	0.000931102	0.00236
Snhg6	941.277	-1.12599	0.106993	1.90624e-26	1.67497e-25
Rasa4	10219.5	-1.12547	0.0655165	1.00108e-66	1.93585e-65
Ctss	42997.6	-1.12472	0.050511	2.27056e-110	7.25906e-109
Ctsh	87.1429	-1.12464	0.392135	0.00100726	0.00253906
Polr3c	5563.81	-1.12437	0.0596754	9.23077e-80	2.11177e-78
Hid1	99.7506	-1.12427	0.357634	0.000418984	0.00111371
Psme2	15734.5	-1.12381	0.0488066	6.38092e-118	2.18308e-116
Cd80	6929.22	-1.12316	0.0757907	3.23093e-50	4.8615e-49
Gm43071	173.856	-1.12275	0.290223	2.92807e-05	8.81511e-05
Lrch3	5021.58	-1.12176	0.0849005	2.21343e-40	2.78234e-39
Pilrb2	38.4885	-1.11977	0.545167	0.00834387	0.0181888
AI427809	9.22752	-1.11931	1.78639	0.0252078	0.0500777
Sp3os	83.01	-1.11919	0.376993	0.000720439	0.00185466
Pdlim5	8005.62	-1.11914	0.0539148	4.05349e-95	1.11856e-93
Rbbp8	2698.95	-1.11787	0.173137	2.85577e-11	1.34742e-10
Dhh	7.5558	-1.11781	1.3736	0.0320613	0.0619512
Arhgap10	4067.98	-1.11711	0.0663841	4.59146e-64	8.47767e-63
Nlrp1b	866.628	-1.11559	0.145121	4.09641e-15	2.31228e-14
Zswim5	9.27111	-1.11558	1.38763	0.0305501	0.0593726
Rdm1	189.093	-1.11496	0.269947	9.82596e-06	3.09752e-05
Mapkbp1	2315.99	-1.11333	0.101156	1.03345e-28	9.65278e-28
Pag1	1756.76	-1.11249	0.0844776	3.83618e-40	4.77848e-39
Hdac1	5381.57	-1.11238	0.0567572	4.78753e-86	1.17528e-84
Gk	8839.65	-1.10985	0.0570178	6.88119e-85	1.67564e-83
Gm6218	16.6726	-1.10979	0.824269	0.0267301	0.0527624
5430416N02Rik	360.212	-1.10826	0.186806	8.70512e-10	3.76434e-09
Map2k1	13861.6	-1.1081	0.0589943	3.02567e-79	6.871e-78
Gm38253	62.5716	-1.10768	0.428214	0.00233974	0.00559303
Zcchc2	9535.39	-1.10689	0.0588328	1.82693e-79	4.17323e-78
A630089N07Rik	304.284	-1.10645	0.183754	4.99169e-10	2.18542e-09
Tnfaip6	21.994	-1.10573	0.758547	0.0232505	0.0464335
Tpk1	435.641	-1.10508	0.179569	2.15242e-10	9.63272e-10
Cyb5r1	8684.38	-1.10457	0.0516584	5.84134e-102	1.73883e-100
Tmem17	52.0445	-1.10452	0.511663	0.00677335	0.0149966
Gm10335	87.8308	-1.10193	0.36303	0.000602167	0.00156702
Zfp229	269.811	-1.10076	0.238097	1.03203e-06	3.55256e-06
Akap3	85.8674	-1.10057	0.40045	0.00144593	0.00356579
Plod3	13269.8	-1.10056	0.0472973	2.43357e-120	8.51863e-119
Cebpe	131.48	-1.09977	0.282033	2.59175e-05	7.85262e-05
Sertad1	1984.64	-1.09782	0.105711	8.13617e-26	6.99063e-25
Foxred1	2097.84	-1.0961	0.104994	5.00384e-26	4.34624e-25
Zfr2	82.1955	-1.09557	0.348141	0.000427411	0.00113471
B3gnt2	10604.4	-1.09516	0.122365	1.02851e-19	7.10515e-19
Slc2a6	34374.6	-1.09356	0.0537898	3.32186e-92	8.7667e-91
Papss2	19.7304	-1.09303	0.848851	0.0293726	0.0573495
Itprid2	10757.7	-1.09137	0.0493211	4.53154e-109	1.43061e-107
Notch1	2365.54	-1.08762	0.108269	2.94374e-24	2.41144e-23
Dclre1a	820.909	-1.08695	0.148758	7.68534e-14	4.08786e-13
Gm48194	44.2996	-1.08643	0.509911	0.00752516	0.0165304
Lrrk1	1881.6	-1.08616	0.146897	4.05771e-14	2.19694e-13
Gsdmd	7128.16	-1.08538	0.0533688	1.85089e-92	4.91901e-91
Gm6548	1111.23	-1.08467	0.136334	5.07044e-16	2.98347e-15
Gm4285	29.746	-1.08335	0.632344	0.01688	0.0347243
Klf6	38815.1	-1.08321	0.0397823	6.51875e-164	3.41095e-162
Dusp2	6896.6	-1.08304	0.0580893	4.70708e-78	1.05141e-76
Dync1h1	23594.1	-1.08207	0.0464051	9.35087e-121	3.28083e-119
B4galt6	3977.54	-1.08141	0.0669734	3.48735e-59	6.02693e-58
Gch1	11802.8	-1.08085	0.0556977	2.1312e-84	5.14826e-83
Sema4d	14606.8	-1.0799	0.0543697	2.56016e-88	6.46324e-87
Xrn2	13983.5	-1.07869	0.0453783	1.78948e-125	6.5681e-124
Cd83	61880.4	-1.07847	0.0535886	1.06595e-90	2.76964e-89
Rab9	2734.89	-1.07822	0.0720255	3.55271e-51	5.39398e-50
Cnot6l	6591.25	-1.07796	0.0778919	4.45052e-44	5.99829e-43
Gm7160	184.597	-1.07779	0.246738	3.65638e-06	1.20147e-05
Rfc3	922.405	-1.0777	0.111695	1.5264e-22	1.17228e-21
Naa25	16582.4	-1.07689	0.0656362	7.68702e-61	1.36116e-59
Slc37a3	3128.16	-1.07478	0.0685035	5.38978e-56	8.91731e-55
Tent4a	11851	-1.073	0.05961	5.98596e-73	1.26424e-71
Evi2a	13582.2	-1.07278	0.0496071	3.07571e-104	9.22836e-103
Lpxn	3749.61	-1.07244	0.0651895	2.54256e-61	4.53402e-60
Apaf1	4264.61	-1.07188	0.0611132	2.1441e-69	4.31731e-68
As3mt	799.244	-1.07173	0.119859	1.18885e-19	8.17172e-19
Dram2	6544.27	-1.071	0.129978	5.18317e-17	3.20704e-16
Hoxb4	1405.49	-1.07052	0.104287	3.18851e-25	2.69216e-24
Gpsm2	1602.11	-1.06838	0.129931	5.88744e-17	3.63536e-16
Gm12606	1238.65	-1.06825	0.0942943	2.92837e-30	2.89052e-29
Gm16230	15.8448	-1.06556	0.943151	0.0342353	0.0658158
Abcc3	213.188	-1.06517	0.306968	0.000148222	0.000412708
Zc3hav1	27725.5	-1.06482	0.0447178	8.10983e-126	2.98387e-124
Shcbp1l	57.3375	-1.06436	0.583915	0.0144195	0.030101
Gcnt1	521.291	-1.06356	0.144006	4.81394e-14	2.59709e-13
Marcksl1	264369	-1.06206	0.0595718	1.44033e-71	2.97958e-70
Xcr1	11.4949	-1.06203	0.989646	0.0363841	0.0695223
Traf1	36920.4	-1.06194	0.0478968	2.02428e-109	6.44445e-108
Elf1	5875.96	-1.06036	0.0607032	7.73097e-69	1.54232e-67
Plekhn1	6397.05	-1.05951	0.11365	3.57723e-21	2.61454e-20
Gm2420	21.73	-1.05949	0.734712	0.0272164	0.0535963
Gm10812	17.3065	-1.05931	0.806115	0.0313409	0.0607145
Vmn2r53	12.1888	-1.05821	0.950806	0.0362858	0.0693784
Apip	275.973	-1.05738	0.200219	3.95978e-08	1.53553e-07
Nrg4	5.2364	-1.05722	2.32584	0.0185228	0.0377699
Cep350	5802.9	-1.05655	0.0582927	6.0654e-74	1.29916e-72
Acpp	30.6054	-1.05649	0.782332	0.0293185	0.0572513
Gm6329	199.917	-1.05611	0.227418	1.02796e-06	3.54017e-06
C130023A14Rik	18.0533	-1.056	0.785231	0.0300818	0.0585905
Fam187b	9.28237	-1.05531	1.6738	0.0271623	0.0535107
Tnni3	21.5335	-1.05494	0.682741	0.0236975	0.0472636
Gm34643	708.28	-1.05412	0.143047	5.58808e-14	3.00401e-13
Il10ra	11338.5	-1.05401	0.0774273	1.12333e-42	1.48359e-41
Slc25a35	66.7767	-1.05225	0.399037	0.00221659	0.00531968
Ncstn	7343.98	-1.05204	0.0665451	8.50476e-57	1.42582e-55
Rpe	5103.83	-1.05198	0.0857363	3.9863e-35	4.42266e-34
Lst1	1649.92	-1.05193	0.122779	3.41917e-18	2.21908e-17
Mxra8	17.4121	-1.05089	0.865058	0.0346144	0.0664769
Gm43420	6.75948	-1.05082	1.53251	0.0318149	0.0615145
Notch2	29127.4	-1.05055	0.0509806	1.44043e-94	3.94605e-93
Egr1	17417.5	-1.04989	0.295311	0.000106721	0.000302555
Mpst	1488.5	-1.04936	0.122407	3.32968e-18	2.16286e-17
Eloa	8793.44	-1.04897	0.0574368	5.05193e-75	1.09606e-73
Amer1	899.331	-1.0475	0.112866	5.41786e-21	3.91817e-20
Gm5824	142.572	-1.04734	0.286241	7.22413e-05	0.000208599
Tatdn3	127.462	-1.04693	0.313949	0.000247891	0.000673726
Rpl36a	16400.3	-1.0468	0.0682035	1.06952e-53	1.70066e-52
A630001G21Rik	1798.22	-1.0432	0.0914455	1.20878e-30	1.20416e-29
Ascc3	8071.67	-1.04231	0.0744436	4.72236e-45	6.45091e-44
Akr1c19	26.2463	-1.04073	0.700875	0.0267432	0.0527704
Rnf115	7588.77	-1.04027	0.0539287	2.16918e-83	5.17387e-82
Plscr4	38.503	-1.03918	0.527902	0.0114528	0.0243552
Gm614	23.4774	-1.0378	0.676219	0.0250543	0.0498046
Hook2	1509.46	-1.0377	0.101769	6.89276e-25	5.76187e-24
Tyk2	8729.71	-1.03444	0.111987	1.17764e-20	8.39617e-20
Lyrm1	291.303	-1.03327	0.19278	2.56793e-08	1.00968e-07
Gm48271	103.028	-1.03258	0.351074	0.00092271	0.00233997
Usp12	6758.79	-1.03043	0.0536408	1.55694e-82	3.67876e-81
Lrrc51	40.3888	-1.0301	0.538902	0.0128622	0.0270782
Pou6f1	586.536	-1.02892	0.161412	6.10964e-11	2.82797e-10
Slc44a1	27253.2	-1.02886	0.0447895	1.97737e-117	6.73462e-116
Ccdc71l	3510.31	-1.02849	0.087293	1.50732e-32	1.57524e-31
Fam72a	452.956	-1.02706	0.158063	2.59411e-11	1.22588e-10
Tmed8	2625.57	-1.02684	0.0708905	4.87665e-48	7.00995e-47
Gm20257	27.8517	-1.02591	0.607071	0.0201964	0.040874
Morn2	90.4794	-1.02579	0.327171	0.000501206	0.00131951
Nup93	6419.68	-1.0255	0.0519967	4.55224e-87	1.13036e-85
Ythdf1	7181.51	-1.02471	0.0671447	4.71006e-53	7.43482e-52
Atad2b	4590.22	-1.02432	0.0659309	7.12942e-55	1.15553e-53
Porcn	61.7983	-1.02418	0.459051	0.00672924	0.0149207
Cpne3	7198.38	-1.02329	0.0497995	2.46544e-94	6.72967e-93
Rdh5	43.4403	-1.02316	0.495552	0.00981392	0.0211345
Gm9776	166.853	-1.02231	0.252894	1.62722e-05	5.03103e-05
Sav1	11338.6	-1.02187	0.0788468	6.96935e-39	8.45152e-38
Hexb	7385.5	-1.02171	0.0497919	5.70635e-94	1.54367e-92
Cd109	1369.02	-1.02158	0.0977773	5.01385e-26	4.35244e-25
Cxcr5	37.1437	-1.02138	0.535669	0.0133004	0.0279557
Alox5ap	2188.97	-1.02055	0.11032	7.02193e-21	5.04924e-20
Cep83os	383.786	-1.02025	0.170045	6.44285e-10	2.80613e-09
Gm35558	21.1646	-1.01949	0.722177	0.0304849	0.0592687
Smpdl3a	2059.73	-1.01946	0.0824438	1.28668e-35	1.43807e-34
Snhg12	820.186	-1.01904	0.136847	3.04112e-14	1.65662e-13
Dmrt2	242.297	-1.01879	0.241291	7.59708e-06	2.4242e-05
Dapp1	745.404	-1.01847	0.255068	1.95102e-05	5.98044e-05
Gm20008	35.1906	-1.01763	0.536777	0.0140249	0.0293462
Ankrd17	17182.4	-1.01759	0.0490016	2.9528e-96	8.28428e-95
Rnf214	2637.98	-1.01676	0.09712	3.97586e-26	3.45733e-25
Gm6377	1675.92	-1.01335	0.116537	1.22645e-18	8.12366e-18
Naga	3003.15	-1.01281	0.0659336	9.98661e-54	1.59133e-52
Zc2hc1a	1682.55	-1.01273	0.0844732	1.35785e-33	1.44398e-32
Lsp1	8766.65	-1.01226	0.0702487	1.62086e-47	2.3167e-46
Platr16	13.8924	-1.01064	0.975434	0.0408377	0.0772039
Dsel	1126.71	-1.00985	0.124657	1.86666e-16	1.12327e-15
Chd5	208.092	-1.00914	0.222262	1.79603e-06	6.06918e-06
Dnm1	214.617	-1.00756	0.258506	3.10212e-05	9.31128e-05
Plekha2	13490.2	-1.00734	0.0734702	3.51508e-43	4.67914e-42
Gm20337	20.3453	-1.00401	0.694379	0.0301052	0.0586286
Slc38a1	20264.9	-1.00296	0.0617541	1.03401e-59	1.8035e-58
Camk2a	8.27316	-1.0027	1.27315	0.0374954	0.0714383
Zfp28	408.227	-1.00215	0.245814	1.46511e-05	4.54656e-05
Gm44013	34.4737	-1.00209	0.579784	0.0195492	0.0396542
Rasgrp4	1461.34	-1.00185	0.121032	4.30153e-17	2.66589e-16
Zfp964	204.506	-0.999364	0.222712	2.37406e-06	7.94786e-06
Trim25	49436.8	-0.998297	0.0640186	2.83251e-55	4.63061e-54
Mpzl3	108.297	-0.998233	0.331852	0.000779199	0.00199476
Atg10	163.121	-0.99719	0.321971	0.000586038	0.00152742
Mre11a	2759.11	-0.996962	0.0971351	3.37966e-25	2.85196e-24
Stat3	9798.2	-0.996357	0.0541855	5.59655e-76	1.22654e-74
Magohb	661.741	-0.996256	0.139931	3.68935e-13	1.89957e-12
Plekhf2	4499.4	-0.996144	0.0636659	1.24277e-55	2.04496e-54
Mttp	112.984	-0.995848	0.314281	0.000475624	0.00125653
9930017N22Rik	74.7141	-0.99463	0.362612	0.00181238	0.00440946
Rgs20	31.7109	-0.994361	0.584258	0.0206605	0.0417351
Yju2	1468.18	-0.994313	0.0897071	5.371e-29	5.06045e-28
Nfkbie	13318	-0.992999	0.0487612	1.37398e-92	3.65799e-91
Lratd2	4701.59	-0.992944	0.0586651	1.0219e-64	1.90779e-63
Cav2	374.04	-0.992758	0.170676	2.07726e-09	8.79406e-09
Nid2	21.4781	-0.992371	0.693863	0.0310993	0.0603237
Gm49338	257.116	-0.992188	0.225429	3.59159e-06	1.18147e-05
Ssc4d	104.744	-0.992068	0.323307	0.000646749	0.00167526
Gm48754	45.9626	-0.992023	0.551596	0.0176629	0.0361824
Plat	123.434	-0.991794	0.322868	0.000663848	0.00171573
Mylpf	36.2764	-0.991444	0.55308	0.017964	0.0367345
Slc7a2	4438.87	-0.99139	0.0670996	7.86119e-50	1.17351e-48
Snhg5	557.111	-0.991211	0.156816	8.89501e-11	4.07483e-10
Evi2b	7681.51	-0.989886	0.0569654	4.38377e-68	8.64294e-67
Tle3	3564.08	-0.989409	0.154637	5.358e-11	2.48844e-10
Dtd1	717.481	-0.987853	0.122186	2.20512e-16	1.32325e-15
Smap2	4933.35	-0.987455	0.0571973	3.25585e-67	6.36111e-66
Casp3	1372.29	-0.986308	0.130371	1.34064e-14	7.39895e-14
Tmem131	8596.97	-0.984651	0.0514963	1.01573e-82	2.40374e-81
Gm826	8.56951	-0.984509	1.16522	0.0423502	0.0796839
Gm42047	11283.9	-0.984422	0.124611	9.47193e-16	5.51326e-15
Prdm13	43.989	-0.98407	0.476174	0.0104071	0.0222944
Catsperg1	35.7951	-0.982793	0.553088	0.018575	0.037856
Gm38372	22.9865	-0.982144	0.650105	0.029188	0.0570555
Il18rap	2012.92	-0.982112	0.08859	5.33187e-29	5.02672e-28
Gm35551	5.85724	-0.980653	1.89313	0.0206454	0.0417127
Fabp7	10.8575	-0.980616	1.58225	0.0276491	0.0543423
Ptpn2	3436.82	-0.979737	0.0634966	3.68445e-54	5.90841e-53
Bcl9	3651.4	-0.975901	0.0790808	2.02849e-35	2.26049e-34
Ppp1r3d	38.0266	-0.975518	0.51377	0.0151697	0.0314715
Gm19076	7.14453	-0.975163	1.26351	0.0399098	0.0756381
Tfb1m	726.209	-0.975081	0.142451	2.69851e-12	1.33837e-11
Carhsp1	7664.12	-0.974592	0.0549305	7.37404e-71	1.50893e-69
Tmem184b	11294	-0.973931	0.0800177	1.5793e-34	1.72684e-33
Abracl	3317.91	-0.972883	0.0687964	7.78665e-46	1.08027e-44
Gm42553	60.8051	-0.971985	0.397405	0.0042889	0.00984917
Homer1	4511.01	-0.970965	0.0724201	1.97543e-41	2.5532e-40
Dram1	13460.2	-0.970469	0.0480957	5.58134e-91	1.45519e-89
Rcbtb1	1600.9	-0.970087	0.09216	2.29881e-26	2.01405e-25
Golga3	8922.17	-0.969998	0.069319	6.27048e-45	8.54254e-44
D130040H23Rik	42.6023	-0.969538	0.497962	0.013844	0.0289957
Gm47484	16.3485	-0.969158	0.850828	0.0430132	0.0807606
Cmtm6	7118.9	-0.969117	0.0547708	1.66044e-70	3.38856e-69
Gata3	99.4363	-0.967902	0.314519	0.00067704	0.00174889
Arf6	13610.6	-0.967866	0.0481994	4.01349e-90	1.0357e-88
Cfp	3371.31	-0.967613	0.0687676	2.01711e-45	2.77298e-44
4930599N23Rik	24.1302	-0.967209	0.629	0.0289581	0.0566851
Vcl	3331.71	-0.965225	0.0918885	3.06121e-26	2.66503e-25
Eif4e3	1344.56	-0.964527	0.0916789	2.50004e-26	2.1853e-25
Tns4	25.7214	-0.963251	0.771768	0.0389719	0.074046
Sh3bp2	5242.41	-0.962927	0.0634755	2.37325e-52	3.69221e-51
Ccl22	17782.4	-0.962362	0.0689105	9.52441e-45	1.29522e-43
Mfsd4b4	582.168	-0.961631	0.149353	4.29671e-11	2.00787e-10
Tmem123	13140.8	-0.961438	0.0458792	5.67438e-98	1.63756e-96
Adgrl2	294.529	-0.961425	0.285497	0.000247791	0.000673574
Tmco3	3798.54	-0.961393	0.195923	3.17931e-07	1.14798e-06
Mag	342.701	-0.959872	0.193463	2.52786e-07	9.22227e-07
Rasgef1b	64751.4	-0.959823	0.0661104	3.60103e-48	5.18123e-47
Nfu1	904.841	-0.958833	0.112472	5.68688e-18	3.65789e-17
Capn1	1402.26	-0.95835	0.103228	5.95687e-21	4.29975e-20
Trim17	8.7759	-0.958246	1.10093	0.0452149	0.0844122
Ddhd1	2776.26	-0.957834	0.117081	1.03473e-16	6.30938e-16
Eml6	15.3852	-0.957732	0.927617	0.046397	0.0863208
Ankle2	4862.78	-0.95763	0.0673482	2.53008e-46	3.54916e-45
Gm8199	17.7457	-0.956333	0.829052	0.0450463	0.0841183
Cyp4f16	462.903	-0.954108	0.198909	5.65853e-07	1.99786e-06
Gm21817	31.7286	-0.953656	0.881279	0.0455629	0.0849885
Prune2	1248.53	-0.953364	0.143781	1.16016e-11	5.59079e-11
Ppfibp1	13748.6	-0.952028	0.0460242	1.67622e-95	4.66809e-94
Dbnl	7665.83	-0.951826	0.0527153	2.48944e-73	5.27986e-72
Slc12a7	5723.61	-0.950528	0.0911972	7.2705e-26	6.25751e-25
Akr1b10	852.579	-0.950488	0.11452	3.89078e-17	2.41628e-16
2810025M15Rik	1180.22	-0.950164	0.0960952	1.74142e-23	1.38453e-22
AC123856.1	298.67	-0.949542	0.836378	0.0422918	0.0796038
Wars	12402.6	-0.949334	0.0646567	3.16813e-49	4.66944e-48
Pfkm	552.362	-0.947903	0.140545	5.71805e-12	2.79381e-11
Rdh10	517.986	-0.94788	0.177613	3.31983e-08	1.29455e-07
Gpx1	6379.1	-0.947092	0.0741816	7.44757e-38	8.81237e-37
Sh3glb1	14943.2	-0.946189	0.148479	7.46764e-11	3.43552e-10
Tnfaip2	220684	-0.945328	0.0433828	1.19116e-105	3.617e-104
Slc23a2	24947.5	-0.945248	0.043415	1.51652e-105	4.58656e-104
Has1	42.5545	-0.944793	0.48911	0.0150713	0.0312888
Card19	10903.1	-0.943792	0.0503503	8.34447e-79	1.88055e-77
Atg13	11811.1	-0.942907	0.0534432	4.39065e-70	8.91213e-69
Rpl30-ps1	31.3288	-0.942395	0.550589	0.0228601	0.0457095
Ube2e1	6262.08	-0.941983	0.0724284	1.26384e-38	1.51922e-37
Cd44	92126.7	-0.941213	0.0359344	4.27626e-152	2.05288e-150
Slc2a9	611.14	-0.941152	0.12888	1.05691e-13	5.57188e-13
Emp2	364.392	-0.94102	0.180569	6.7917e-08	2.587e-07
Intu	190.584	-0.940608	0.233934	2.08079e-05	6.35926e-05
Prkce	315.859	-0.939732	0.23265	1.82479e-05	5.60977e-05
Tmed1	601.332	-0.939339	0.142369	1.52862e-11	7.32438e-11
Gm14461	17.4644	-0.939152	0.818446	0.0456808	0.085156
Rab3ip	1383.54	-0.938055	0.0911886	3.10945e-25	2.62688e-24
Syt8	15.7973	-0.937232	0.879702	0.0465972	0.0866294
Gm19391	36.5211	-0.936532	0.696792	0.0391826	0.0743716
1700052K11Rik	240.489	-0.935996	0.203009	1.47403e-06	5.01019e-06
Snw1	7558.62	-0.935239	0.0551884	8.68944e-65	1.62827e-63
5430414B19Rik	25.7416	-0.935051	0.780429	0.0436151	0.0817284
Zmynd15	742.607	-0.934497	0.161953	2.82302e-09	1.18747e-08
Cryz	683.25	-0.934257	0.136628	3.10529e-12	1.53609e-11
Ddit3	2890.93	-0.932577	0.0704499	2.06246e-40	2.59472e-39
Zfp160	954.167	-0.93188	0.119762	2.79888e-15	1.59115e-14
Rbfox1	2224.5	-0.930324	0.0826423	7.85325e-30	7.65186e-29
Osbpl1a	410.889	-0.929881	0.1842	1.59576e-07	5.91303e-07
Smim3	2115.35	-0.929848	0.0897647	1.42396e-25	1.21519e-24
Apmap	2014.77	-0.929083	0.0773896	1.29374e-33	1.37678e-32
Gm37893	92.8257	-0.928489	0.428548	0.00929873	0.020085
Grina	6917.12	-0.928459	0.0776426	4.93862e-33	5.19345e-32
Rps18	3317.94	-0.928409	0.123232	1.89559e-14	1.03934e-13
4931428F04Rik	187.701	-0.928366	0.297242	0.000620572	0.00161242
4930509G22Rik	11.4647	-0.927967	1.09086	0.0465531	0.0865579
Swap70	15111.9	-0.927723	0.0571467	9.82547e-60	1.71571e-58
Ugt1a7c	3972.11	-0.927368	0.0755453	4.58601e-35	5.08056e-34
Znrd1as	209.982	-0.927013	0.257367	0.000114382	0.000323124
Hscb	559.49	-0.926967	0.149593	2.24286e-10	1.00167e-09
Spire2	52.4924	-0.926243	0.450572	0.0118507	0.0251011
Gemin7	1457.97	-0.925462	0.141944	2.55463e-11	1.20911e-10
Gm16025	23.2206	-0.925326	0.633399	0.0354032	0.067811
Gm42547	782.842	-0.924859	0.148208	1.6409e-10	7.40264e-10
Pgap3	347.288	-0.924279	0.191716	5.19769e-07	1.84074e-06
Krtcap3	29.4288	-0.923739	0.58157	0.0291811	0.0570494
Wdr31	23.4894	-0.923442	0.731802	0.0443261	0.0829475
Mrpl30	2910.04	-0.922427	0.0844382	3.45228e-28	3.18909e-27
Tceanc	185.183	-0.922416	0.237473	3.68851e-05	0.000109734
9130230N09Rik	24.3994	-0.921882	0.615618	0.0337897	0.0650251
Etv6	8607.63	-0.921868	0.0596106	2.26651e-54	3.64619e-53
Cdkn3	191.849	-0.921857	0.264081	0.000174113	0.000480463
Phactr4	1695.87	-0.920452	0.0984669	3.46234e-21	2.53547e-20
Ccne1	258.652	-0.919555	0.197869	1.24572e-06	4.25809e-06
Jpt1	6650.03	-0.918772	0.0516028	2.52363e-71	5.20632e-70
Zfp952	766.04	-0.918217	0.159346	3.20792e-09	1.34489e-08
Serpinb8	551.083	-0.917847	0.153121	7.59718e-10	3.29465e-09
Ptges3l	180.145	-0.917714	0.253856	0.00010905	0.000308813
Syt7	425.617	-0.917663	0.164767	9.675e-09	3.92029e-08
Nlgn2	1375.44	-0.916174	0.192954	7.73078e-07	2.69739e-06
Zbtb3	223.251	-0.916127	0.232281	3.00756e-05	9.04362e-05
3110001I22Rik	387.621	-0.915924	0.168869	2.23019e-08	8.79626e-08
Gm14137	42.1751	-0.915722	0.482687	0.0170934	0.0351061
Anks1	2556.76	-0.914032	0.0922265	1.51644e-23	1.20756e-22
Wdr1	21811.9	-0.912752	0.0457693	7.14633e-89	1.8132e-87
Zfp763	135.682	-0.912592	0.297468	0.000750328	0.00192607
Med13l	7815.37	-0.911602	0.075304	3.97303e-34	4.29451e-33
Tlr7	11435.1	-0.909929	0.0649168	5.09197e-45	6.94952e-44
Tbk1	8414.15	-0.909648	0.0558837	5.51827e-60	9.68066e-59
Lsm10	1274.96	-0.909194	0.104858	1.72677e-18	1.13581e-17
Optn	58.7653	-0.908739	0.429457	0.0107645	0.0230127
Zfp184	5.99674	-0.907774	1.38529	0.0342487	0.0658331
Nme4	113.839	-0.907745	0.341319	0.00271737	0.00643773
Coq2	1290.97	-0.907565	0.092877	5.86788e-23	4.58337e-22
Amn1	908.296	-0.907441	0.128376	5.95182e-13	3.03451e-12
Cfh	3298.51	-0.907115	0.0743332	1.18936e-34	1.30424e-33
Ghitm	39029.5	-0.905487	0.0396596	9.58699e-116	3.21451e-114
B3gnt3	1011.05	-0.903267	0.116968	4.43593e-15	2.50112e-14
Ryr1	470.872	-0.902649	0.152431	1.27024e-09	5.45232e-09
Cept1	11397.7	-0.902504	0.0525907	2.06396e-66	3.97088e-65
Gm33869	13.827	-0.902363	0.827399	0.0526725	0.0966995
Drc3	25.6998	-0.902326	0.714306	0.0449691	0.0839845
AI837181	2296.08	-0.901548	0.103987	1.74534e-18	1.14752e-17
Pcmtd1	2014.96	-0.900795	0.0913334	2.48373e-23	1.96438e-22
Rab13	421.093	-0.900294	0.168121	3.3975e-08	1.32381e-07
Vma21	11731.9	-0.899988	0.0742999	3.64294e-34	3.94052e-33
Mdfic	16566.9	-0.899943	0.052243	6.87813e-67	1.33347e-65
Map3k8	2951.87	-0.898146	0.0736962	1.42507e-34	1.56159e-33
Rpl10a	38828.2	-0.896922	0.318185	0.00168746	0.00412309
Arsb	1602.55	-0.895663	0.111969	4.85037e-16	2.85843e-15
Pparg	31.1153	-0.895481	0.611193	0.0369368	0.0704717
Ifi213	1836.26	-0.894999	0.12385	2.06711e-13	1.07566e-12
Kremen1	2356.97	-0.894526	0.0796411	1.16947e-29	1.13001e-28
Rgs16	8776.74	-0.893351	0.105647	1.03307e-17	6.59161e-17
B230220B15Rik	16.3329	-0.892794	0.930632	0.0545712	0.0997651
4833418N02Rik	12.9786	-0.892753	0.850387	0.0545733	0.0997651
Sfxn5	65.4482	-0.89272	0.488413	0.0205705	0.0415865
Bcas1	7.05824	-0.89252	1.48095	0.0265403	0.052422
Zdhhc2	654.598	-0.891727	0.197362	2.35394e-06	7.88573e-06
Fgd6	4490.54	-0.891693	0.0767057	1.25143e-31	1.27435e-30
Dgkg	36.5739	-0.890629	0.611222	0.0384254	0.073072
Mier3	1432.13	-0.890294	0.108892	1.12615e-16	6.8392e-16
Tmem231	88.5668	-0.889961	0.341482	0.00320663	0.00750979
Cib2	57.3429	-0.889488	0.404876	0.00932119	0.0201249
Ptpn13	9.42483	-0.889103	1.00694	0.0562358	0.102482
Irf9	8141.55	-0.888712	0.06417	5.33172e-44	7.16678e-43
Cpt1c	10.6851	-0.888229	1.04315	0.0501691	0.0925531
Ctbs	806.966	-0.887942	0.113124	1.71343e-15	9.8519e-15
Lrmda	377.901	-0.88731	0.214295	1.37094e-05	4.26835e-05
Sf3b1	27215.3	-0.887166	0.052985	2.63692e-63	4.81588e-62
Igsf6	7894.4	-0.887148	0.060158	1.29436e-49	1.92461e-48
2210406H18Rik	281.26	-0.886928	0.191192	1.36533e-06	4.65221e-06
Dock6	593.748	-0.886852	0.266244	0.000317272	0.000854003
Gm3654	13.4398	-0.886757	0.848425	0.0544957	0.0996476
Rab12	6437.62	-0.885982	0.0554049	6.45685e-58	1.09832e-56
Ada	183.94	-0.885471	0.246898	0.000129002	0.000361986
Hdac1-ps	220.767	-0.885211	0.288085	0.000773492	0.00198149
Slc1a4	2311.4	-0.885015	0.0935133	1.21976e-21	9.09975e-21
Pde4c	15.6861	-0.884888	0.814221	0.0544456	0.0995799
Ube2r2	5271.41	-0.884758	0.129127	2.94829e-12	1.46081e-11
Slirp	1669.81	-0.884645	0.108123	1.10069e-16	6.68994e-16
Pmepa1	693.393	-0.884573	0.150092	1.56401e-09	6.67163e-09
Pi4k2a	10941.9	-0.884295	0.052591	8.54043e-64	1.56544e-62
Akap7	420.123	-0.884176	0.206039	7.07305e-06	2.26415e-05
Gm9320	12.8497	-0.881749	0.867215	0.0565108	0.102959
Tstd3	1270.25	-0.88148	0.0940752	3.06848e-21	2.25032e-20
Dynlt1f	1201.62	-0.88095	0.11803	3.55818e-14	1.93202e-13
Bphl	468.629	-0.880689	0.154626	5.00906e-09	2.06733e-08
Flna	57110	-0.880203	0.0466123	6.55607e-80	1.50441e-78
Clec10a	218.389	-0.880182	0.212707	1.39207e-05	4.33147e-05
Qpct	841.712	-0.880094	0.119082	5.90771e-14	3.16796e-13
Armc2	51.2135	-0.879721	0.460829	0.0177421	0.0363298
Txndc16	1266.09	-0.879412	0.106622	6.84918e-17	4.21201e-16
4933430I17Rik	72.7705	-0.879157	0.365733	0.00567496	0.0127325
Nfkb2	52559.2	-0.879014	0.0414988	6.3608e-100	1.85691e-98
Gm28809	61.227	-0.878608	0.514929	0.0260056	0.0514802
Ikbke	20556.7	-0.878534	0.0907484	1.48769e-22	1.14371e-21
Lamp2	28336.6	-0.876542	0.0405036	3.043e-104	9.14835e-103
Gm12059	6.1701	-0.875943	1.26738	0.0429466	0.0806655
Zfp90	432.96	-0.875535	0.153458	4.70598e-09	1.94703e-08
Pced1b	154.555	-0.875368	0.276828	0.000587194	0.0015299
Lpin2	1979.3	-0.87531	0.0994592	5.83e-19	3.91654e-18
Hebp1	266.626	-0.875145	0.194468	2.73597e-06	9.09904e-06
Phf6	3936.74	-0.874271	0.0611866	1.0864e-46	1.53251e-45
Pf4	118.035	-0.87396	0.361277	0.00553437	0.0124428
Scd2	4710.96	-0.873464	0.0563972	1.76312e-54	2.84242e-53
Calhm2	345.437	-0.873055	0.178902	4.37767e-07	1.56093e-06
Tank	10441	-0.872481	0.0461318	3.29519e-80	7.58445e-79
Vcan	55.4679	-0.871307	0.942657	0.0536646	0.0982704
Zfp773	103.957	-0.870908	0.326122	0.00283075	0.00668749
Gm47567	7.48028	-0.87083	1.09309	0.0529059	0.0970572
Socs7	4920.6	-0.870257	0.0710082	6.63546e-35	7.31885e-34
Sirt1	2090.33	-0.869708	0.110989	1.90665e-15	1.09379e-14
Unc13d	130.191	-0.869644	0.298587	0.00137188	0.00339591
Shank1	8.16124	-0.869252	1.37208	0.0291338	0.0569715
Cytip	15.1344	-0.868722	0.775485	0.0565604	0.103024
Arhgap15	660.551	-0.868682	0.167686	1.05505e-07	3.95894e-07
Cfap70	5.76569	-0.86854	1.8995	0.00448146	0.0102571
Prkra	738.166	-0.868458	0.117863	7.29927e-14	3.89208e-13
Gm42634	39.1894	-0.867959	0.733869	0.0540711	0.0989188
Fuz	526.207	-0.86778	0.145513	1.00182e-09	4.32104e-09
Trmt1l	3012.08	-0.867605	0.0668917	7.52734e-39	9.10628e-38
Slc35d1	1108.36	-0.865661	0.117215	6.29997e-14	3.37352e-13
Fzd5	2078.79	-0.864811	0.0981558	5.23127e-19	3.52057e-18
Larp1	34476.8	-0.864344	0.041235	6.32042e-98	1.81706e-96
4921511C10Rik	10.9102	-0.863836	1.00733	0.0573885	0.104394
Coro6	24.3285	-0.863553	0.641867	0.0457507	0.0852653
Olfml3	51.6257	-0.863013	0.44263	0.0170615	0.0350597
4833438C02Rik	560.139	-0.861411	0.160647	3.33765e-08	1.30082e-07
Naip3-ps1	8.68664	-0.861407	1.12482	0.0517109	0.0951189
Zdhhc4	617.497	-0.861292	0.18031	7.40796e-07	2.58913e-06
Hspb11	688.614	-0.860968	0.126457	4.22692e-12	2.07936e-11
Laptm4a	11269.8	-0.860723	0.0476264	2.29629e-73	4.8839e-72
1110038B12Rik	2894.08	-0.860447	0.0712334	6.0179e-34	6.45867e-33
Traf2	3048.99	-0.860017	0.0729965	2.04402e-32	2.12584e-31
Ppdpf	1072.04	-0.859648	0.122428	9.54035e-13	4.81058e-12
Gm43379	25.9824	-0.857394	0.647972	0.0488504	0.0903629
Gm38220	13.5499	-0.857391	0.881657	0.0611892	0.11051
Mdp1	565.1	-0.856865	0.145117	1.52802e-09	6.5218e-09
Gm49359	488.958	-0.855816	0.155124	1.49594e-08	5.96247e-08
Gm39469	64.5955	-0.854573	0.38762	0.00983741	0.0211708
G3bp2	10472.9	-0.854506	0.0545399	9.13543e-56	1.50486e-54
Zfp213	145.689	-0.854363	0.266053	0.000517931	0.00136022
Ptgr1	356.903	-0.853997	0.169022	1.82363e-07	6.72444e-07
Nxf1	8653.22	-0.853421	0.0817559	7.21185e-26	6.21057e-25
Kyat1	73.6765	-0.852296	0.366689	0.00740806	0.0162874
Apool	1083.3	-0.852292	0.104357	1.34638e-16	8.15377e-16
Cmbl	10.2618	-0.852282	0.916335	0.0614623	0.110965
Ccr2	322.79	-0.852034	0.234829	0.000113109	0.000319826
Hmgb1-ps3	16.8248	-0.851447	0.747347	0.0589416	0.106911
Trim36	2427.97	-0.851268	0.0747922	2.23865e-30	2.21986e-29
Arhgap17	4652.65	-0.851126	0.0666511	1.07332e-37	1.26407e-36
Zfp319	1570.23	-0.851015	0.0844384	3.00239e-24	2.45815e-23
Mastl	310.287	-0.850884	0.220782	4.71688e-05	0.000138826
Klhl20	2297.89	-0.849935	0.0898653	1.33269e-21	9.93242e-21
Acyp1	239.001	-0.849514	0.212458	2.65352e-05	8.03495e-05
Paxx	201.898	-0.848542	0.219227	4.45198e-05	0.000131567
Llgl1	3297.79	-0.848525	0.0967699	7.77385e-19	5.19012e-18
Gm2000	4713.16	-0.84833	0.0602962	2.53593e-45	3.47989e-44
Zmat1	86.7157	-0.84814	0.336494	0.00445857	0.0102109
Sp4	1131.42	-0.847907	0.141874	9.52254e-10	4.11193e-09
Map2k4	4773.79	-0.847402	0.081293	8.36143e-26	7.1801e-25
Cyp4f17	38.0855	-0.847299	0.491957	0.0277229	0.0544731
Gm47761	902.198	-0.846422	0.187459	2.69094e-06	8.95914e-06
2310010J17Rik	17.9217	-0.84638	0.753818	0.0590884	0.107164
E330011M16Rik	13.5432	-0.844751	0.914905	0.0599625	0.108541
Lrp11	1219.75	-0.844645	0.0941193	1.26238e-19	8.66534e-19
Trdmt1	391.38	-0.844473	0.161674	7.55638e-08	2.86385e-07
Lca5	1556.46	-0.842854	0.0867702	1.15452e-22	8.93485e-22
Cep192	2543.65	-0.842343	0.099512	1.15604e-17	7.35758e-17
Tstd2	3318.33	-0.842225	0.067852	1.01927e-35	1.14427e-34
Bloc1s6	4449.81	-0.841931	0.0806247	6.89251e-26	5.94573e-25
Aebp2	22080.3	-0.841669	0.0496125	8.8728e-65	1.66058e-63
Gm47486	45.5134	-0.841161	0.470644	0.0250852	0.049854
4930453N24Rik	2991.91	-0.840869	0.781462	0.0587648	0.106629
Arpc5l	4200.78	-0.839881	0.0617247	1.67725e-42	2.20935e-41
Gm45684	5.27688	-0.839677	1.29871	0.0404802	0.0766038
Elac1	1418.01	-0.839557	0.0893026	2.40385e-21	1.77582e-20
Ppargc1b	360.79	-0.839153	0.247179	0.000285241	0.000771907
Gm42918	26.9738	-0.838968	0.718539	0.0575827	0.104722
Clec7a	2777.41	-0.838778	0.0747037	1.30357e-29	1.25718e-28
Gm5451	9.88645	-0.838384	0.979376	0.0604697	0.109341
Ecm1	2265.27	-0.83618	0.095838	1.14819e-18	7.61196e-18
Nfix	1419.53	-0.835732	0.114912	1.51683e-13	7.94509e-13
Ranbp2	18814.2	-0.835581	0.0444091	2.39132e-79	5.44982e-78
Tspyl4	10.9042	-0.835312	0.893659	0.0651669	0.116774
mt-Nd4l	4034.14	-0.835	0.338619	0.00519787	0.0117492
Krcc1	2745.48	-0.834784	0.101603	9.08285e-17	5.55627e-16
Fgr	20998.3	-0.834702	0.0503295	4.09411e-62	7.35286e-61
Metap1d	1273.71	-0.834397	0.152053	1.80939e-08	7.17401e-08
Gm4864	629.521	-0.834318	0.176995	1.02941e-06	3.54434e-06
1500002F19Rik	18.4719	-0.834068	0.699333	0.0595024	0.107837
Ttc28	57.0538	-0.833909	0.521803	0.0349392	0.0670411
Pigbos1	204.674	-0.833629	0.223363	7.96293e-05	0.000228927
Scaper	1000.01	-0.83352	0.105791	1.44476e-15	8.33878e-15
Cers6	25925.4	-0.833491	0.0431057	2.11442e-83	5.05923e-82
Vezt	2204.27	-0.832766	0.385036	0.0111543	0.0237907
Timm10b	1809.92	-0.83242	0.0898678	8.96838e-21	6.42139e-20
Zfand1	652.102	-0.831889	0.136794	5.38119e-10	2.35254e-09
Gm20939	531.195	-0.831556	0.140164	1.32328e-09	5.67519e-09
Rpl31-ps9	38.1313	-0.830718	0.600943	0.0482292	0.0893448
Gm46224	146.354	-0.830668	0.255279	0.000475078	0.00125553
Slfn14	5.88959	-0.829995	1.74223	0.00446053	0.0102138
Olfr784	18.0872	-0.82968	0.687947	0.0592931	0.10751
C330018D20Rik	457.038	-0.829329	0.151132	1.79146e-08	7.10661e-08
Tcn2	1351.06	-0.828805	0.111968	6.12327e-14	3.28238e-13
Washc1	1715.25	-0.827627	0.106118	2.90974e-15	1.65293e-14
Stx3	5866.65	-0.827195	0.0667936	1.4681e-35	1.63963e-34
Pcdhga7	83.4932	-0.827128	0.33333	0.00515512	0.011663
Arhgap18	427.409	-0.825892	0.17465	1.00616e-06	3.46983e-06
Gm11843	17.5737	-0.825524	0.970077	0.058857	0.10677
Zfp467	199.01	-0.825212	0.263751	0.000724455	0.00186408
Ccnl1	9486.21	-0.823998	0.061018	7.38125e-42	9.63066e-41
Tab2	20016.6	-0.823837	0.0407509	3.18765e-91	8.33973e-90
Arl6ip1	5459.94	-0.823469	0.0939702	7.41383e-19	4.95413e-18
Slc45a3	993.386	-0.823405	0.122283	7.46026e-12	3.62863e-11
4632415L05Rik	1424.73	-0.822262	0.18682	4.56726e-06	1.48465e-05
Dqx1	59.8021	-0.82225	0.396954	0.0143937	0.0300588
F3	1219.59	-0.822098	0.721408	0.0606372	0.109592
Gm20707	135.793	-0.821658	0.272384	0.00106549	0.00267602
Arid4a	2800.74	-0.821632	0.0872008	2.01205e-21	1.49075e-20
Rpl17	56475.5	-0.821439	0.0563899	2.14378e-48	3.09926e-47
Gm48362	121.984	-0.821254	0.295358	0.00222991	0.00534909
Cyth1	1548.09	-0.820698	0.0960133	5.51365e-18	3.54949e-17
Gm46349	54.9304	-0.820668	0.433377	0.0208972	0.0421462
Gm16536	225.962	-0.820354	0.210519	4.25446e-05	0.000125976
Tet2	9801.71	-0.819401	0.0716321	1.22959e-30	1.22409e-29
Treml2	12.7902	-0.818773	1.19383	0.039161	0.0743494
Rcbtb2	611.883	-0.818702	0.191072	8.00448e-06	2.54668e-05
Sumo1	6904.96	-0.818642	0.0569144	3.01379e-47	4.29139e-46
Crbn	4003.17	-0.818612	0.061365	6.1051e-41	7.77771e-40
Ilrun	10609.8	-0.818402	0.0549543	1.73468e-50	2.61795e-49
Chpt1	709.19	-0.817044	0.12294	1.34428e-11	6.45957e-11
Cav1	62.569	-0.817042	0.454945	0.0258693	0.0512304
Bcl2a1d	23099.2	-0.816944	0.0438553	8.40046e-78	1.87086e-76
Dgkh	2251.73	-0.816561	0.190803	8.12168e-06	2.58228e-05
Tmem18	949.229	-0.816267	0.121622	8.87785e-12	4.30291e-11
Zic5	22.4835	-0.815802	0.708434	0.0644214	0.115602
Cntln	454.13	-0.815744	0.155805	7.38039e-08	2.80066e-07
Gm21596	687.286	-0.815615	0.124535	2.60377e-11	1.23006e-10
Gm49662	5.04554	-0.81559	1.44208	0.0281774	0.05528
Brd8dc	118.881	-0.815566	0.353226	0.00806724	0.0176367
Itgav	28802	-0.815489	0.0811319	4.1813e-24	3.39397e-23
Gstt1	50.3682	-0.815298	0.427727	0.020719	0.041842
Cacng8	174.033	-0.813697	0.299697	0.00267495	0.00634718
Tut4	2977.18	-0.813579	0.146358	1.22618e-08	4.9223e-08
Map1b	387.114	-0.812953	0.175897	1.67747e-06	5.68632e-06
Ccdc18	47.7803	-0.812873	0.561348	0.0459976	0.085662
Pacsin1	48.867	-0.812489	0.511838	0.0371578	0.0708665
Clcn5	3581.53	-0.812276	0.0966955	2.13514e-17	1.34141e-16
Olfr1372-ps1	11.3634	-0.812065	1.03285	0.0602432	0.108997
Sdsl	149.88	-0.811643	0.268312	0.00103386	0.00260177
Armc3	12.6016	-0.810852	1.04665	0.0550362	0.100526
Arf5	5742.82	-0.809417	0.055059	2.8091e-49	4.14836e-48
Ankrd44	813.315	-0.808975	0.119331	5.67131e-12	2.77187e-11
Taf15	11086.1	-0.808357	0.0758292	7.41802e-27	6.60243e-26
Gas5	7675.38	-0.808074	0.0537819	2.41624e-51	3.67959e-50
Klhl41	137.98	-0.807264	0.286571	0.00200859	0.00484741
Cyp4f13	667.943	-0.806921	0.122771	2.2798e-11	1.08344e-10
Abhd6	481.77	-0.806912	0.150099	3.45747e-08	1.34614e-07
Rpl37	24145.9	-0.806605	0.0398888	2.65038e-91	6.94611e-90
Gm10036	93.1053	-0.806469	0.345279	0.00772888	0.0169558
Icosl	4374.26	-0.806066	0.06856	2.85075e-32	2.96078e-31
Ccdc50	20563.8	-0.804759	0.0837601	3.40207e-22	2.58264e-21
Ptprc	47556.5	-0.804031	0.0408756	1.84482e-86	4.54354e-85
Pla2g2d	6.96914	-0.803645	1.06028	0.0591244	0.107217
Brwd3	2249.59	-0.802713	0.0989003	2.19226e-16	1.31605e-15
Tmem171	2458.94	-0.801971	0.121986	2.28198e-11	1.0838e-10
5430405H02Rik	119.356	-0.800651	0.432532	0.0239715	0.047785
Nostrin	762.506	-0.800589	0.11806	5.51014e-12	2.69571e-11
Ptms	12444.6	-0.800408	0.119109	8.41759e-12	4.08376e-11
Acvr1	1631.19	-0.799301	0.0926872	2.95476e-18	1.9218e-17
Gm28437	63387.8	-0.798606	0.109071	1.05314e-13	5.55481e-13
Edil3	621.316	-0.798503	0.154341	1.05912e-07	3.97321e-07
Abhd15	26.3908	-0.797764	0.576634	0.0527117	0.0967597
Mycl	21.9175	-0.797282	1.21096	0.0310391	0.0602147
Diaph2	3599.01	-0.797061	0.0815601	6.9325e-23	5.40935e-22
Rnf24	2052.11	-0.796664	0.0856339	6.54898e-21	4.71365e-20
Lta	180.571	-0.796181	0.238426	0.000368394	0.000985294
Znf41-ps	28.589	-0.795994	0.575189	0.0531777	0.0975203
Wdr37	6876.57	-0.795978	0.0601144	2.37882e-40	2.98279e-39
Rpl29	447.209	-0.795604	0.154854	1.26767e-07	4.73327e-07
Cabin1	3945.7	-0.79535	0.0603239	5.07667e-40	6.30809e-39
Synj1	6441.77	-0.79522	0.0871958	2.28615e-20	1.61623e-19
Tmem192	1464.98	-0.794773	0.0964579	8.31928e-17	5.09948e-16
Tram2	890.665	-0.794366	0.11251	7.79199e-13	3.95272e-12
Zc3h7b	2329.19	-0.794109	0.0882086	1.01615e-19	7.02294e-19
Il2rg	14622	-0.79179	0.0476109	2.06589e-62	3.73688e-61
Chmp1b	6252.91	-0.791193	0.061301	1.99275e-38	2.38972e-37
Prrg4	1236.26	-0.790855	0.128818	3.98934e-10	1.75522e-09
Tfg	6390.72	-0.790123	0.0551531	5.02702e-47	7.11785e-46
Gm2774	18.9576	-0.790099	0.679346	0.067483	0.120368
Gm4610	13.0882	-0.788749	0.971328	0.0664743	0.118905
Gm28417	20.7542	-0.787277	0.683863	0.0692319	0.12311
Sco1	1050.72	-0.786116	0.102638	8.87135e-15	4.94298e-14
Zfp97	477.885	-0.784453	0.195142	2.71057e-05	8.19784e-05
Dok1	5022.87	-0.784097	0.0730617	3.59733e-27	3.22267e-26
Gm4750	5.71969	-0.783995	1.19153	0.0435609	0.081657
Arf3	18934.5	-0.783952	0.0477004	5.20785e-61	9.25418e-60
Rps27rt	36339.1	-0.783379	0.0636947	8.33688e-35	9.1821e-34
Synj2bp	3239.86	-0.783317	0.0725234	1.67733e-27	1.51884e-26
Asap3	87.7092	-0.782885	0.406187	0.0208411	0.0420549
Nrros	9012.75	-0.782883	0.0737887	1.0563e-26	9.35209e-26
Slc49a4	1194.93	-0.782877	0.547262	0.0499624	0.0922167
Mthfd2	24128.7	-0.782601	0.0444597	1.22831e-69	2.4799e-68
Nrm	403.785	-0.78236	0.203136	5.32393e-05	0.000155786
Napsa	4711.56	-0.782326	0.0697185	1.58302e-29	1.5228e-28
Acot9	7674.07	-0.782073	0.0516629	4.51e-52	6.9592e-51
Hmga1	8120.13	-0.781341	0.0583606	3.59803e-41	4.61488e-40
Gm8983	9.56174	-0.779961	0.916001	0.0717975	0.126985
Smim8	283.272	-0.779323	0.186948	1.42635e-05	4.43356e-05
Ifnar2	5235.98	-0.779271	0.0663379	3.50608e-32	3.62399e-31
Alox12	5.96934	-0.778388	1.13289	0.0532735	0.0976606
Ascc1	871.669	-0.778309	0.10922	4.98358e-13	2.5529e-12
Gm10388	5.64397	-0.778035	1.39562	0.0248334	0.0493859
Rab21	7670.81	-0.777718	0.0550732	1.73722e-45	2.39693e-44
Gm42732	40.4692	-0.777567	0.571799	0.0574344	0.104465
E130311K13Rik	234.069	-0.777487	0.210588	0.000102425	0.000290923
Fbh1	3729.37	-0.777131	0.0609512	1.5142e-37	1.77365e-36
Tnks1bp1	3611.1	-0.776876	0.0922888	1.84992e-17	1.16658e-16
Pigl	292.291	-0.776764	0.194764	3.11573e-05	9.35028e-05
Gm49378	5.60101	-0.776694	1.53971	0.00513443	0.011618
Klf4	1689.64	-0.776612	0.118921	3.22382e-11	1.51729e-10
Gm47445	5.60181	-0.776484	1.5391	0.00513411	0.011618
mt-Atp6	68250.2	-0.776299	0.216194	0.00014908	0.000414791
Them4	454.597	-0.776026	0.167648	1.74078e-06	5.89171e-06
Phip	5424.56	-0.775987	0.0640583	4.49021e-34	4.84315e-33
Smpdl3b	5386.93	-0.775376	0.0594986	4.2697e-39	5.20277e-38
Rab3d	626.764	-0.775144	0.160551	6.69844e-07	2.35075e-06
Csgalnact2	2771.54	-0.774959	0.0695628	3.85669e-29	3.67029e-28
Kctd10	6327.25	-0.774946	0.0663776	8.23562e-32	8.42049e-31
Kat6a	6779.68	-0.774752	0.0620899	4.82052e-36	5.43999e-35
Gng5	5142.06	-0.774614	0.0578353	3.03491e-41	3.89923e-40
Sugct	14.371	-0.774386	0.823213	0.0748222	0.131627
Pdlim2	1239.16	-0.77437	0.0956993	2.85044e-16	1.6997e-15
Mocs2	1784.25	-0.774195	0.0857964	9.13514e-20	6.32227e-19
Gm10275	46460.6	-0.772196	0.0521498	6.04525e-50	9.06009e-49
Fbxl5	4818.78	-0.77193	0.0657975	4.45123e-32	4.59151e-31
Gm9903	12.4574	-0.771681	0.808113	0.0771972	0.135223
Atp13a1	4766.72	-0.771658	0.0685421	1.01931e-29	9.88074e-29
Gm9887	20.1314	-0.771406	0.649581	0.070644	0.125311
Ascc2	3719.18	-0.771031	0.0651406	1.26154e-32	1.3193e-31
Rgs2	6376.41	-0.770828	0.0879825	9.10068e-19	6.04659e-18
Gm4204	31.2479	-0.770743	0.652106	0.0709371	0.125684
Gm6061	135.322	-0.770374	0.650488	0.0690585	0.122888
Mier1	5467.36	-0.769965	0.0791295	1.11459e-22	8.63019e-22
Nkiras2	2995.75	-0.769727	0.079956	2.98036e-22	2.26819e-21
Ccdc180	6.04643	-0.768868	1.14928	0.0504524	0.0930302
Gm6789	94.4855	-0.768083	0.388777	0.0198615	0.04025
Efhb	6.16993	-0.767623	1.37545	0.0259239	0.051325
Psmg4	680.357	-0.767387	0.121352	1.25693e-10	5.71306e-10
Rps18-ps6	39173	-0.76717	0.0488895	8.68624e-56	1.43242e-54
H2-Oa	51.6388	-0.767056	0.483209	0.0421722	0.0794082
Klf7	13664.1	-0.766936	0.0540956	6.25201e-46	8.7056e-45
Rnf2	5701.99	-0.76556	0.0932344	2.13162e-16	1.28118e-15
Wdfy4	6726	-0.76444	0.0810048	1.7986e-21	1.33522e-20
Zfp324	221.691	-0.764338	0.23942	0.000660911	0.00170872
Kif21a	358.121	-0.76407	0.25859	0.0014333	0.0035375
Cd2ap	8312.57	-0.76403	0.0503363	2.44597e-52	3.80144e-51
Nqo2	699.667	-0.76298	0.169385	3.23892e-06	1.07151e-05
Arhgdib	13387.2	-0.762973	0.0531477	4.86345e-47	6.89269e-46
Coq10b	2586.45	-0.762824	0.0716407	8.95799e-27	7.94503e-26
Wls	3410.78	-0.762759	0.0722212	2.23588e-26	1.96006e-25
Polb	1588.74	-0.761962	0.0841605	6.90592e-20	4.80586e-19
Nxpe3	1248.54	-0.761416	0.0940923	2.9675e-16	1.76811e-15
Gbx1	19.6476	-0.761259	0.945781	0.0712614	0.126184
Gm48780	12.4901	-0.760988	0.797935	0.0811684	0.141246
Hsdl2	566.073	-0.760864	0.136103	1.10748e-08	4.46505e-08
Fbxo42	5137.28	-0.760624	0.0562584	5.79805e-42	7.57806e-41
Pigh	359.318	-0.759997	0.211395	0.000154249	0.000428069
Atad1	9899.6	-0.759899	0.158885	9.86046e-07	3.40356e-06
Nlrp1c-ps	22.802	-0.759773	0.70363	0.0766457	0.134365
A930024E05Rik	20.2398	-0.759772	0.658177	0.074618	0.131359
Cradd	133.827	-0.758708	0.29766	0.00478184	0.0108771
Rybp	3477.25	-0.758267	0.0685401	9.35287e-29	8.75753e-28
Rab32	8770.18	-0.758064	0.0496309	5.59612e-53	8.77848e-52
Rnf19b	23386.3	-0.757926	0.0406688	8.77004e-78	1.9503e-76
Abhd14b	78.0415	-0.757525	0.371892	0.0177359	0.0363229
Atf5	7527.47	-0.756303	0.0654045	3.12323e-31	3.16128e-30
Gm42783	31.8947	-0.755891	0.521179	0.0535743	0.0981287
Gm50221	7.79712	-0.755435	0.968093	0.0717374	0.126908
Psma3	7656.75	-0.754651	0.14679	1.35446e-07	5.04487e-07
Hmga1b	24107.5	-0.754204	0.065397	4.58995e-31	4.61497e-30
Chmp5	4772.85	-0.753465	0.055809	7.92256e-42	1.0328e-40
Birc3	18077.1	-0.752883	0.0438771	2.1343e-66	4.10101e-65
Fbxl12	555.747	-0.752688	0.161916	1.65929e-06	5.62847e-06
Zbtb20	750.935	-0.752653	0.21646	0.000238058	0.000647933
Mgat1	2952.05	-0.75174	0.0799657	2.82081e-21	2.07573e-20
Pdzd11	1291.05	-0.751489	0.0946288	1.02841e-15	5.97682e-15
Gm43138	9.89184	-0.751392	0.91183	0.0778847	0.136269
Paqr3	277.918	-0.751088	0.229317	0.000502855	0.00132338
Il1rn	62480.9	-0.750131	0.0513697	1.4586e-48	2.12494e-47
Slc25a12	4650.27	-0.75002	0.699304	0.0770247	0.134983
Lgmn	16736.9	-0.749574	0.0435706	1.27931e-66	2.46758e-65
Ehbp1	468.717	-0.749548	0.144792	1.1185e-07	4.19075e-07
BC005537	24615	-0.749434	0.0462179	2.11758e-59	3.66804e-58
Map3k5	2988.23	-0.749209	0.0668039	1.7595e-29	1.69041e-28
Rps3	76060.9	-0.749096	0.381829	0.0208269	0.0420357
Ddr2	16.4063	-0.748593	0.966815	0.0614739	0.110972
Cwf19l2	3102.4	-0.748459	0.0673203	5.25928e-29	4.96138e-28
Nubpl	231.665	-0.748386	0.209764	0.000176068	0.000485326
Erlin1	2387.99	-0.747442	0.0749907	1.07488e-23	8.62755e-23
Epb41l4aos	342.489	-0.747317	0.221767	0.000363893	0.0009736
Taf1b	1617.48	-0.745585	0.0878873	1.13088e-17	7.20659e-17
Gm50255	7.81016	-0.745217	0.955089	0.0730763	0.1289
Cd2bp2	6093.99	-0.745136	0.0639244	1.03613e-31	1.05582e-30
Gm5149	5.35734	-0.745096	1.28285	0.0279631	0.0549167
mt-Cytb	61511.1	-0.744646	0.351501	0.0147957	0.0307971
Mbd2	6506.77	-0.744509	0.0625604	6.16857e-33	6.48236e-32
Hdac11	9.76425	-0.74447	0.934751	0.0756086	0.13284
Lin9	833.495	-0.744169	0.113903	3.30502e-11	1.55406e-10
Mmp14	4489.82	-0.743492	0.0631851	3.01136e-32	3.11903e-31
Cox20	236.284	-0.743441	0.221354	0.000385068	0.00102662
Pkig	1165.41	-0.742496	0.100661	8.41695e-14	4.466e-13
Itpkb	7256.8	-0.742323	0.0532971	2.0501e-44	2.78042e-43
Rras2	3517.6	-0.742221	0.0680936	6.02412e-28	5.5378e-27
Cd300ld3	500.662	-0.742093	0.14111	7.4016e-08	2.808e-07
Sesn3	22.8092	-0.740886	1.05376	0.0526465	0.0966634
Ap1g2	2059.64	-0.740505	0.0871407	9.9714e-18	6.36503e-17
Spint2	75.9367	-0.739888	0.35268	0.0158329	0.032762
Pikfyve	5033.33	-0.739454	0.0567803	4.73535e-39	5.75165e-38
Bbip1	1224.17	-0.739317	0.103556	4.90665e-13	2.51435e-12
Susd3	924.516	-0.739312	0.114099	4.82727e-11	2.24817e-10
Eef1akmt2	780.994	-0.738631	0.118498	2.37213e-10	1.05846e-09
Mindy3	2434.1	-0.738532	0.0910899	2.61128e-16	1.55893e-15
P2rx4	2399.59	-0.738434	0.0920574	5.3029e-16	3.11662e-15
Pld4	15667.4	-0.738336	0.0496568	2.63537e-50	3.96933e-49
Cpq	120.181	-0.738297	0.279826	0.00392922	0.00908109
Dcxr	477.035	-0.738238	0.152312	6.33973e-07	2.22848e-06
Erbin	13192.7	-0.737639	0.0445781	8.73425e-62	1.56678e-60
Tomm40l	1059.17	-0.737206	0.100737	1.31702e-13	6.91525e-13
Ccdc17	60.5065	-0.736999	0.39055	0.0252813	0.0501974
C230037L18Rik	15.025	-0.736813	0.818993	0.08365	0.144997
Gm49539	6.01867	-0.736366	1.43396	0.00477947	0.0108734
Tbx15	1238.38	-0.736255	0.0960467	9.212e-15	5.12712e-14
Jak3	1338.79	-0.736245	0.0996242	7.69078e-14	4.08931e-13
Reps2	163.954	-0.736197	0.257054	0.00199648	0.00482356
Adora2a	2321.5	-0.736093	0.0908911	2.90467e-16	1.73135e-15
Kctd18	529.811	-0.736079	0.145908	2.36892e-07	8.6738e-07
Gm38377	7.98417	-0.735672	0.951383	0.0745897	0.131324
Zfp955a	574.076	-0.735563	0.148903	4.04296e-07	1.44534e-06
Cd180	5342.41	-0.735309	0.0578645	2.88775e-37	3.35396e-36
Tbxas1	60.8037	-0.734831	0.622687	0.0746977	0.131471
Commd1	1036.62	-0.73471	0.144005	1.675e-07	6.193e-07
Top3a	834.275	-0.734709	0.131789	1.30348e-08	5.22291e-08
H1f0	7910.2	-0.734625	0.0496398	7.66478e-50	1.14532e-48
Seh1l	5848.29	-0.734401	0.07085	1.88185e-25	1.60233e-24
Timmdc1	1088.14	-0.733486	0.0987312	5.74061e-14	3.08163e-13
Rps12	40779	-0.732871	0.0930954	1.32355e-15	7.65088e-15
Gm6451	88.526	-0.731781	0.343891	0.0150582	0.031266
Rps16	41548.6	-0.729536	0.386406	0.0270702	0.0533501
[truncated: 13,423 more rows]
