# Supplementary figures and images for: Statin-mediated reduction in mitochondrial cholesterol primes an anti-inflammatory response in macrophages by upregulating Jmjd3
Source: eLife journal article supplement (doi:10.7554/elife.85964), 2024-04-11

## Supplementary

Figure 5-figure supplement 1

A

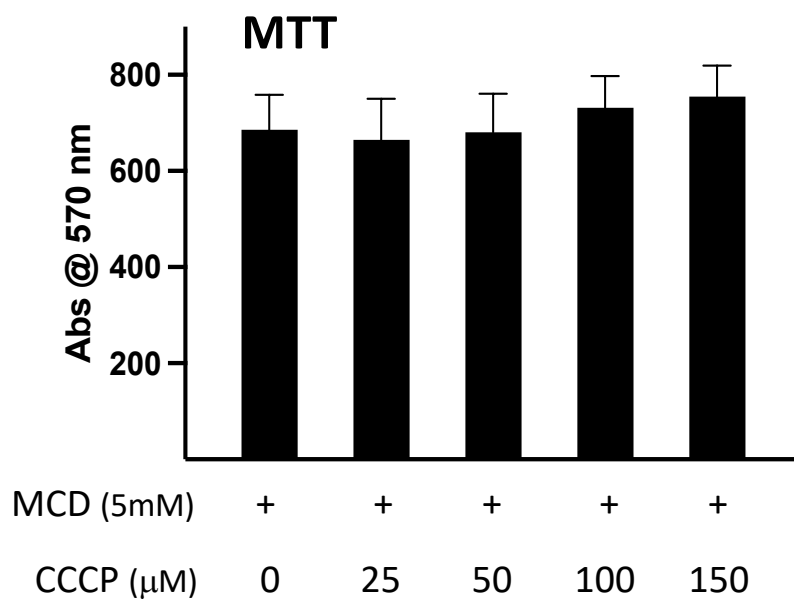

B

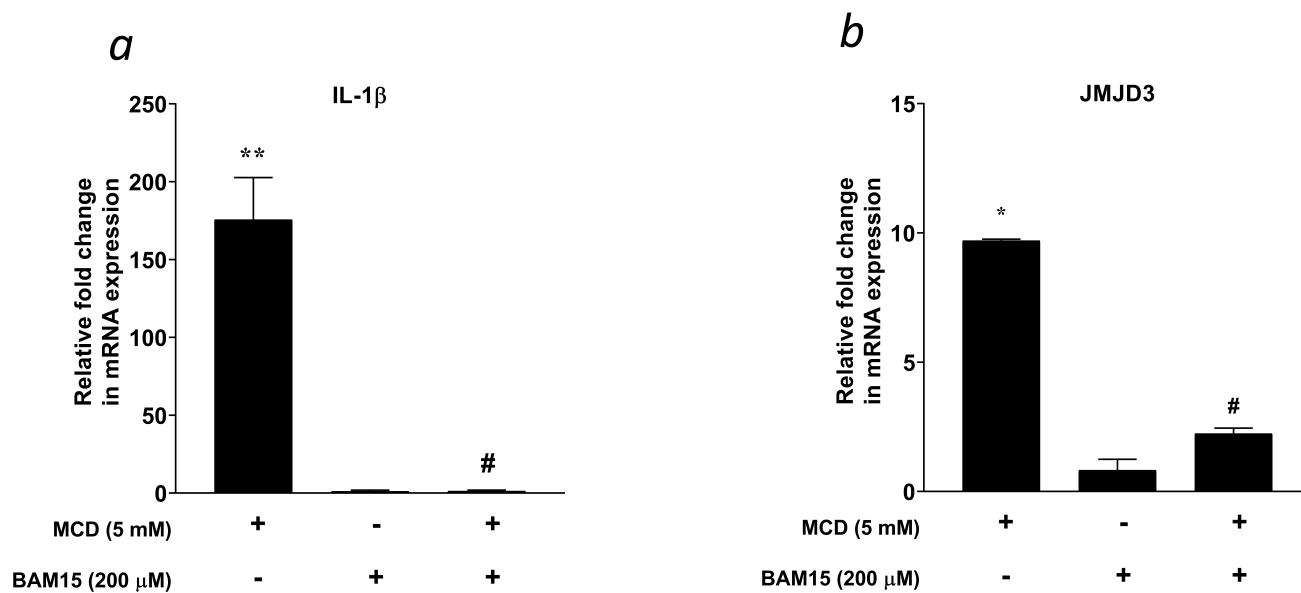

Supplement: supp [file elife-85964-supp-v1.zip]

Figure 1-figure supplement 1

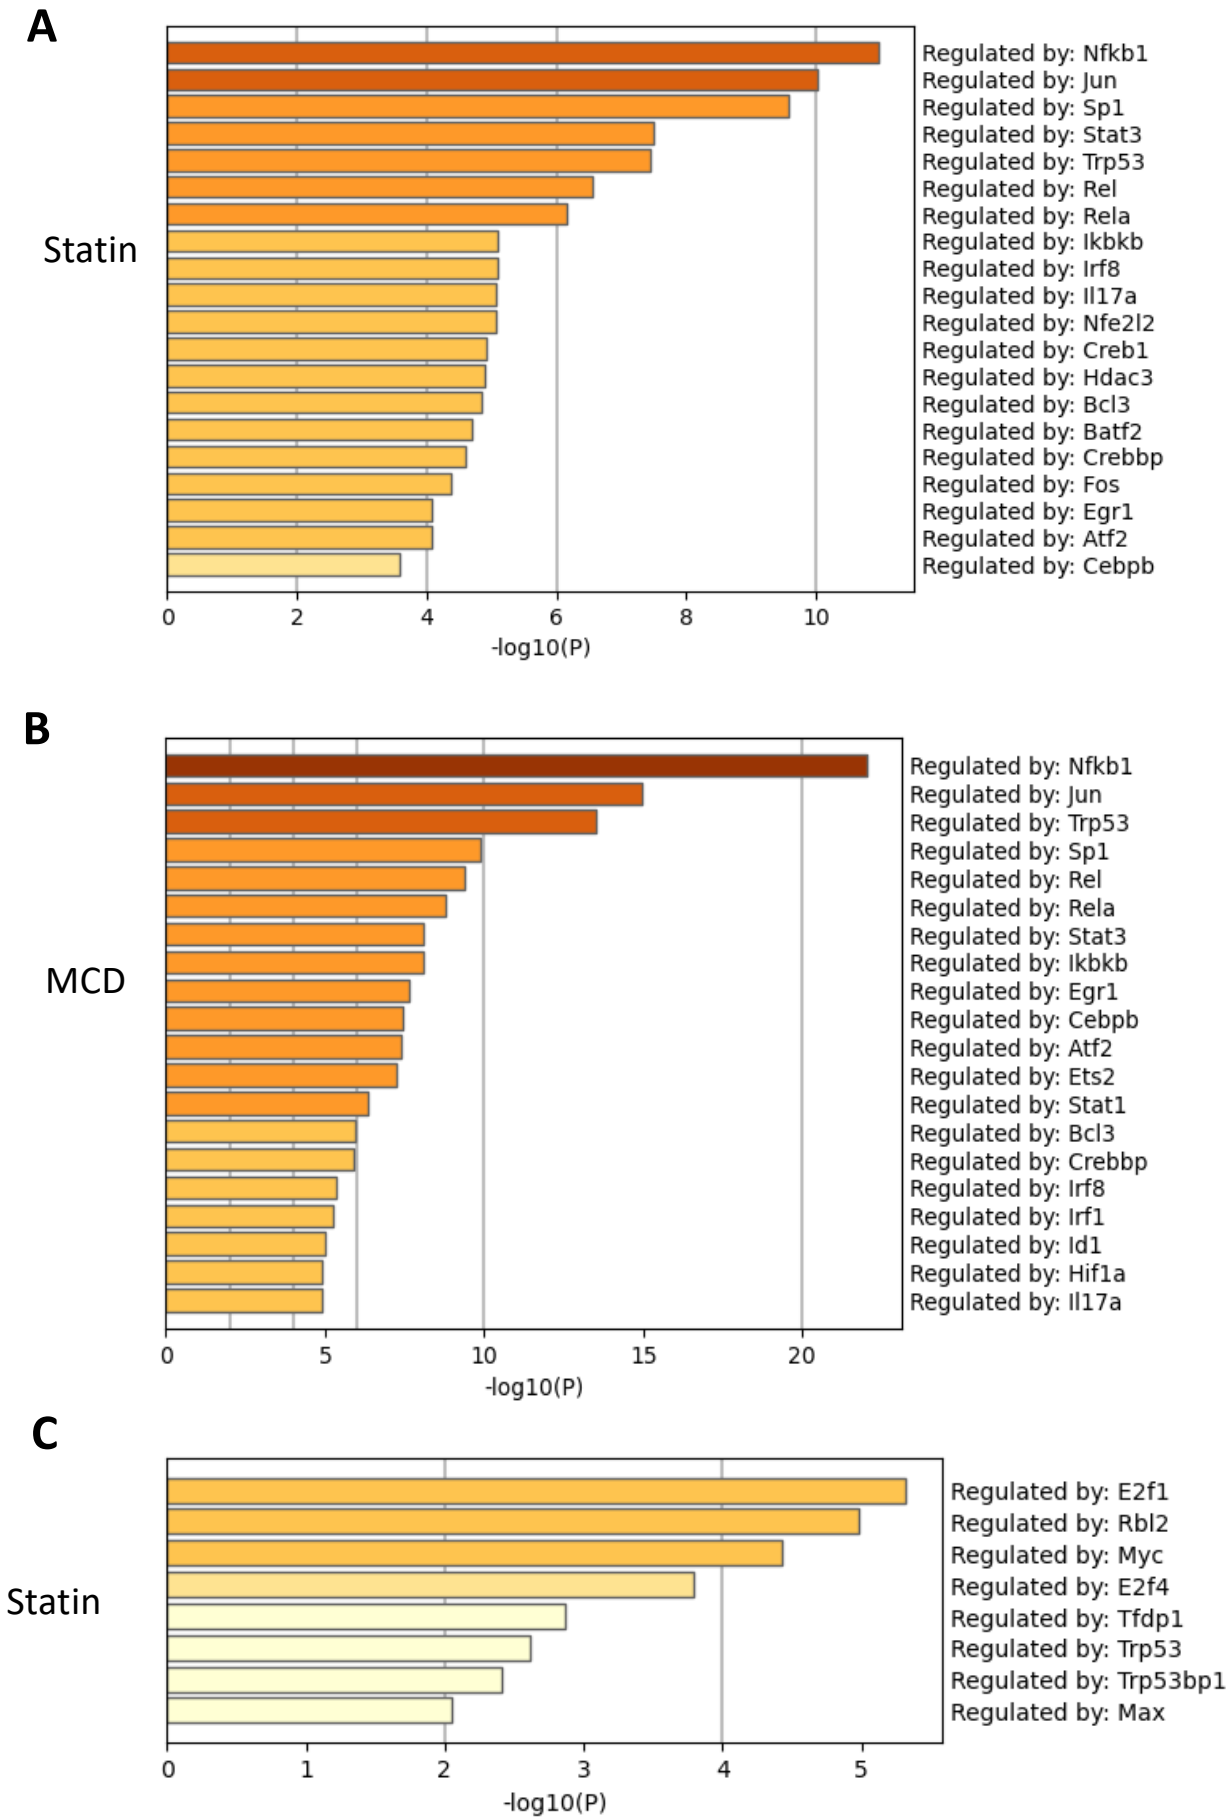

Supplement: supp [file elife-85964-supp-v1.zip]

## Supplementary

Figure 6-Figure Supplement 1

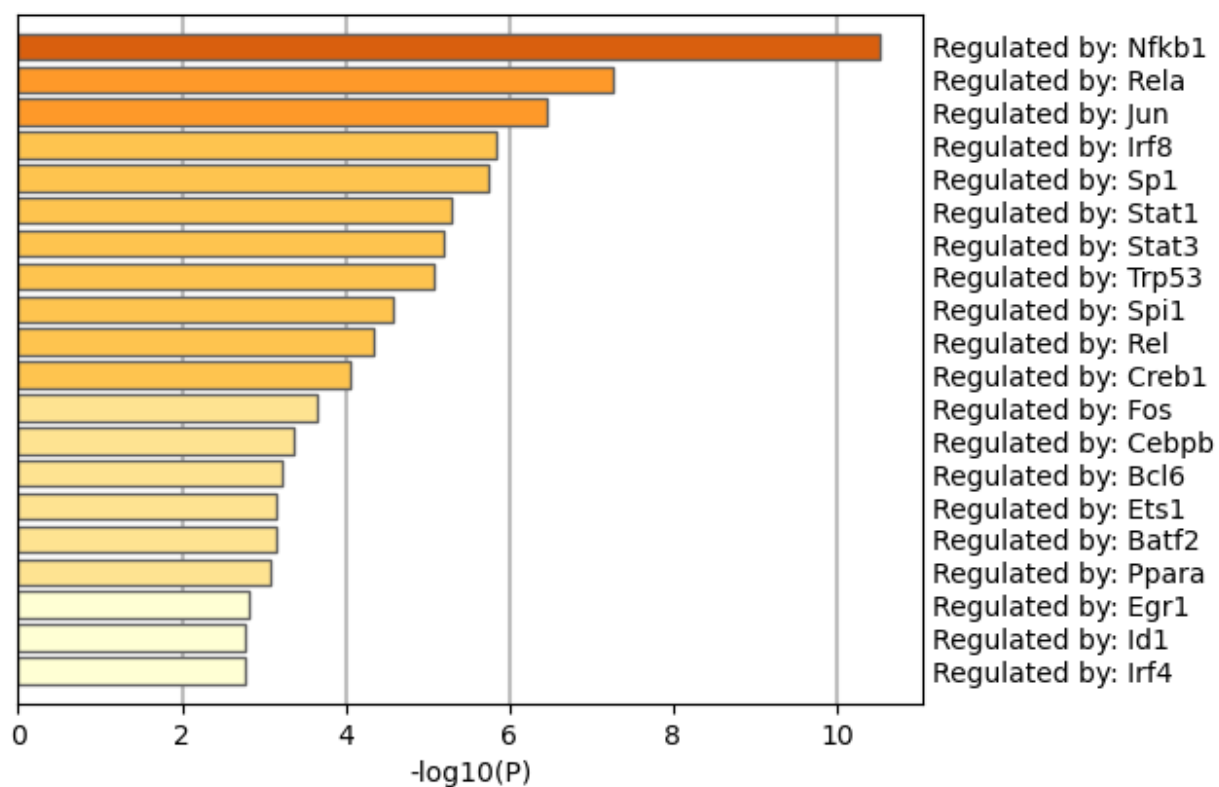

Supplement: supp [file elife-85964-supp-v1.zip]

## Supplementary

Figure 4-figure supplement 1

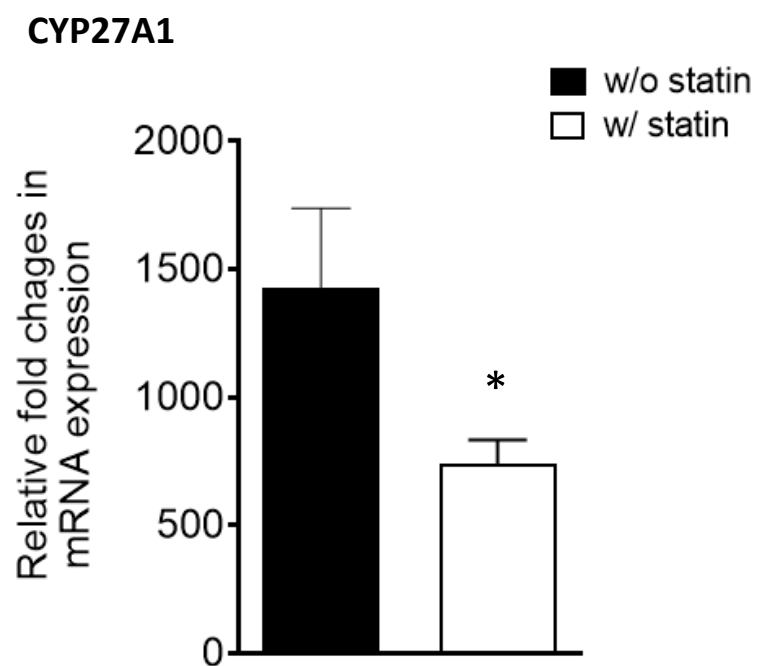

Supplement: supp [file elife-85964-supp-v1.zip]

## Supplementary

Figure 1-figure supplement 4

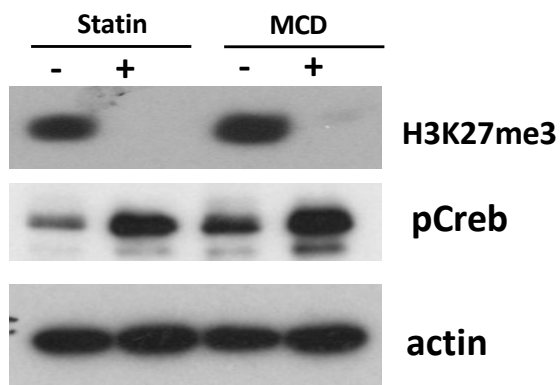

Supplement: supp [file elife-85964-supp-v1.zip]

Supplementary

Figure 1-figure supplement 3

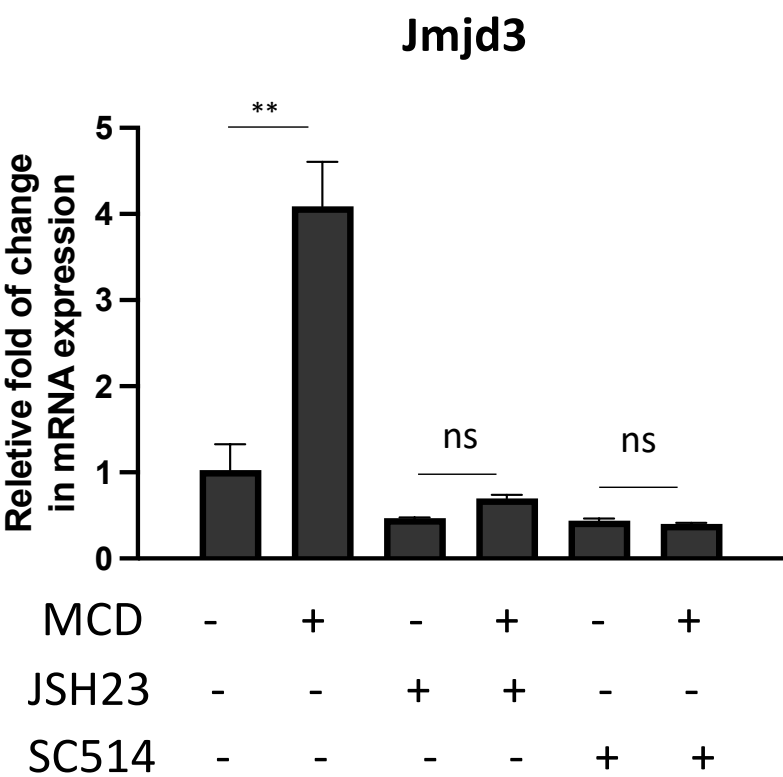

Supplement: supp [file elife-85964-supp-v1.zip]

## Supplementary

Figure 8-figure supplement 1

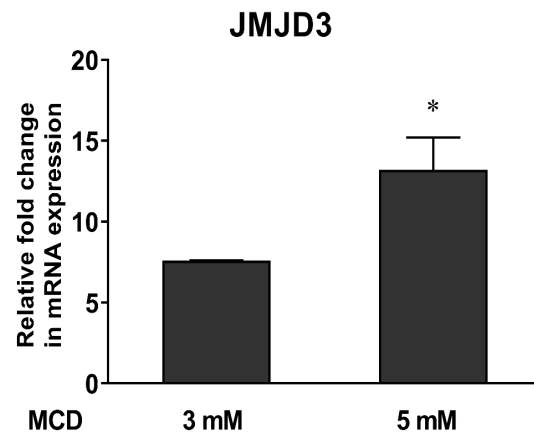

Supplement: supp [file elife-85964-supp-v1.zip]

## Supplementary

Figure 8-figure supplement 2

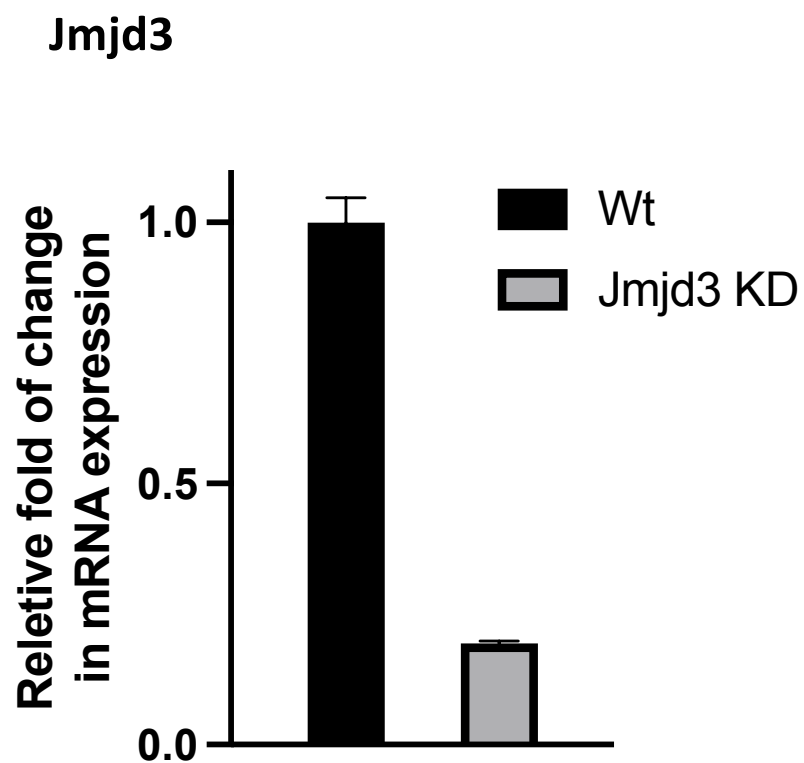

Supplement: supp [file elife-85964-supp-v1.zip]
